# Supplementary material for: Human Blood Serum Can Diminish EGFR-Targeted Inhibition of Squamous Carcinoma Cell Growth through Reactivation of MAPK and EGFR Pathways
Source: Cells. 2023 Aug 8;12(16):2022. doi: 10.3390/cells12162022 (PMC10453612; doi:10.3390/cells12162022)
Supplement: Supplementary file 1 [file cells-12-02022-s001.zip › Supporting Tables S2-S4.xlsx]

## Sheet: Table S2 RNAseq_full
log2FoldChange	cetuximab_egf_vs_cetuximab	cetuximab_egf_vs_egf	cetuximab_sd_vs_cetuximab	cetuximab_sd_vs_sd	cetuximab_egf_vs_no	cetuximab_sd_vs_no	cetuximab_vs_no	erlotinib_vs_no	egf_erlotinib_vs_no	sd_erlotinib_vs_no	egf_erlotinib_vs_egf	egf_erlotinib_vs_erlotinib	sd_erlotinib_vs_erlotinib	sd_erlotinib_vs_sd	sd_vs_no	egf_vs_no		Cetuximab core Gene Group	Erlotinib core gene group														sdf
AATBC	2.50996	NA	NA	-3.41156	NA	-3.15415	-4.21498	-3.18291	-4.1103	NA	-3.13109	NA	NA	-2.60653	NA	NA			Erlotinib core gene group
ABCA2	1.62596	NA	NA	-1.39293	NA	NA	-1.62193	-1.24794	-1.25611	NA	-1.01518	NA	NA	NA	NA	NA		Cetuximab core Gene Group	Erlotinib core gene group
ABCA5	1.02091	NA	NA	NA	NA	NA	NA	-1.00283	-1.01894	NA	NA	NA	NA	NA	NA	NA			Erlotinib core gene group
ABHD4	1.84402	NA	NA	NA	NA	NA	-1.32865	-2.18697	-1.63165	-1.38925	-2.1453	NA	NA	-1.63238	NA	NA		Cetuximab core Gene Group
ABI3BP	2.74765	NA	2.35923	NA	NA	NA	-3.54015	-3.04281	-3.46114	NA	NA	NA	NA	NA	NA	NA		Cetuximab core Gene Group	Erlotinib core gene group
ABL2	-1.24828	NA	NA	NA	NA	NA	NA	NA	1.00194	NA	1.91456	NA	NA	NA	NA	NA
ABLIM2	2.53422	NA	NA	-1.86529	NA	NA	-2.05692	-1.74036	-1.40747	NA	-1.71525	NA	NA	-1.60462	NA	NA		Cetuximab core Gene Group	Erlotinib core gene group
ABLIM3	-1.21831	NA	NA	NA	NA	NA	NA	NA	NA	NA	NA	NA	NA	NA	NA	NA
ABO	1.11128	NA	NA	NA	NA	NA	NA	NA	NA	NA	NA	NA	NA	NA	NA	NA
ACCS	1.07401	NA	NA	-1.04297	NA	-1.18815	-1.46868	NA	-1.39679	NA	NA	NA	NA	NA	NA	NA
ACE2	2.87799	NA	NA	-3.4816	NA	-2.80497	-3.78648	-3.64919	-3.24188	NA	NA	NA	2.47799	NA	NA	NA			Erlotinib core gene group
ACER2	1.44588	NA	NA	NA	NA	NA	NA	-1.13712	NA	NA	NA	NA	NA	NA	NA	NA			Erlotinib core gene group
ACKR3	2.12068	NA	NA	-2.43388	NA	-1.09076	-1.59553	-1.98746	-1.56025	NA	-2.12559	NA	1.21338	-2.10665	1.34174	NA			Erlotinib core gene group
ACOT7	-1.51474	NA	NA	NA	NA	NA	1.13618	1.23961	1.25949	NA	1.80243	NA	NA	NA	NA	NA		Cetuximab core Gene Group	Erlotinib core gene group
ACP5	2.86326	NA	1.13703	-2.15774	NA	NA	-1.91528	-2.49054	-1.97138	NA	-2.48757	NA	1.96255	-1.90868	1.361	NA		Cetuximab core Gene Group	Erlotinib core gene group
ACTN1	-1.31064	NA	NA	NA	NA	NA	1.11256	1.20472	NA	NA	1.26672	NA	NA	NA	NA	NA		Cetuximab core Gene Group	Erlotinib core gene group
ACTR3C	2.32788	NA	NA	-1.32312	NA	NA	-1.9965	-1.7892	-1.7102	NA	-1.40925	NA	NA	NA	NA	NA		Cetuximab core Gene Group	Erlotinib core gene group
ACYP2	1.15887	NA	NA	NA	NA	NA	NA	-1.07416	NA	NA	NA	NA	NA	NA	NA	NA			Erlotinib core gene group
ADAM28	1.37057	NA	NA	NA	NA	NA	NA	NA	NA	NA	NA	NA	NA	NA	NA	NA
ADAM8	-2.41213	NA	NA	NA	NA	NA	NA	NA	NA	NA	NA	NA	NA	1.77324	NA	-2.02072
ADAMTS6	-2.2171	NA	NA	NA	NA	NA	NA	1.42385	NA	NA	2.49711	NA	NA	1.3634	NA	NA			Erlotinib core gene group
ADAMTS7	3.05073	NA	NA	NA	NA	NA	-2.36385	NA	NA	NA	NA	NA	NA	NA	NA	NA		Cetuximab core Gene Group
ADAMTSL5	1.01395	NA	NA	NA	NA	NA	NA	NA	NA	NA	NA	NA	NA	NA	NA	NA
ADAP1	-2.38155	NA	NA	1.80277	NA	1.44299	2.10972	3.91537	2.79454	1.57961	2.79334	NA	-2.34224	1.95298	NA	NA
ADD3	1.40758	NA	NA	NA	NA	NA	-1.46881	-1.27288	-1.22656	NA	-1.28782	NA	NA	NA	NA	NA		Cetuximab core Gene Group	Erlotinib core gene group
ADGRF1	2.52369	NA	NA	-1.54454	NA	NA	-2.80007	NA	-2.41527	NA	NA	NA	NA	NA	NA	NA		Cetuximab core Gene Group
ADGRV1	1.53031	NA	NA	NA	NA	NA	-1.56345	-1.25061	NA	NA	NA	NA	NA	NA	NA	NA		Cetuximab core Gene Group	Erlotinib core gene group
ADIRF-AS1	-1.5113	NA	NA	1.2511	NA	1.12679	1.18355	1.48173	NA	NA	NA	NA	NA	1.12393	NA	NA			Erlotinib core gene group
ADORA2B	-1.09689	NA	NA	NA	NA	NA	1.41239	1.59064	1.55263	NA	NA	NA	NA	1.03471	NA	NA		Cetuximab core Gene Group	Erlotinib core gene group
ADRB2	-2.3178	NA	NA	1.13835	NA	NA	1.06859	1.56699	1.22199	NA	2.95706	NA	-1.24952	1.2243	NA	-1.72999		Cetuximab core Gene Group	Erlotinib core gene group
ADSSL1	1.84224	NA	NA	-2.07952	NA	NA	-1.90299	-1.82985	-1.74727	NA	-1.96127	NA	1.48471	NA	NA	NA		Cetuximab core Gene Group	Erlotinib core gene group
ADTRP	-2.34435	NA	NA	1.53146	NA	1.54058	2.28517	1.56386	NA	NA	NA	NA	-1.16994	NA	NA	NA			Erlotinib core gene group
AEN	-1.58405	NA	NA	NA	NA	NA	1.46863	2.06181	1.81641	NA	1.89058	NA	-1.09515	1.03008	NA	NA		Cetuximab core Gene Group	Erlotinib core gene group
AFAP1L1	-1.34123	NA	NA	NA	NA	NA	NA	1.42993	1.55758	NA	2.05755	NA	-1.1019	NA	NA	NA			Erlotinib core gene group
AKR1B10	5.24994	NA	NA	-3.32791	NA	-2.73645	-3.90284	-2.68002	NA	NA	NA	NA	NA	NA	NA	NA			Erlotinib core gene group
AKR1C2	3.93183	NA	2.93467	NA	NA	NA	NA	NA	NA	NA	-2.27117	NA	NA	NA	NA	NA
AKR1C3	3.50237	NA	NA	NA	NA	NA	NA	NA	NA	NA	-2.2939	NA	NA	NA	NA	NA
ALDH1A1	3.74711	NA	NA	NA	NA	NA	-5.64698	-3.58387	NA	NA	NA	NA	NA	NA	NA	NA		Cetuximab core Gene Group	Erlotinib core gene group
ALDH3A1	4.19671	NA	NA	-2.43295	NA	NA	-2.89736	-3.36115	-2.77771	NA	-4.42553	NA	2.34556	-2.44562	1.43695	NA		Cetuximab core Gene Group	Erlotinib core gene group
ALDH3B2	3.56046	NA	NA	-3.5523	NA	NA	-3.49689	-3.26407	-3.13375	NA	NA	NA	1.70351	NA	NA	NA		Cetuximab core Gene Group	Erlotinib core gene group
ALDOC	1.27173	NA	NA	-1.72177	NA	-1.34566	-1.67426	-1.59744	-1.45878	NA	NA	NA	NA	-1.02733	NA	NA			Erlotinib core gene group
ALOXE3	-2.24055	NA	NA	2.29839	NA	2.13336	2.26012	2.12075	2.59647	NA	2.37283	NA	NA	1.34431	NA	NA			Erlotinib core gene group
ALPK3	1.71271	NA	NA	NA	NA	NA	-1.60332	NA	NA	NA	NA	NA	NA	NA	NA	NA		Cetuximab core Gene Group
AMOTL2	-1.51293	NA	NA	NA	NA	NA	NA	NA	NA	NA	NA	NA	NA	NA	NA	NA
ANK3	1.74289	NA	NA	NA	NA	NA	-1.47157	-1.42081	-1.56645	NA	-1.98689	NA	NA	NA	NA	NA		Cetuximab core Gene Group	Erlotinib core gene group
ANKRD13B	-1.01102	NA	NA	NA	NA	NA	1.17595	1.37156	1.4542	NA	1.27709	NA	NA	NA	NA	NA		Cetuximab core Gene Group	Erlotinib core gene group
ANKRD62	3.72435	NA	NA	-4.49159	NA	-3.79242	-4.5816	-3.56262	-4.30028	NA	-4.4452	NA	NA	-3.11989	NA	NA			Erlotinib core gene group
ANXA2	-1.11006	NA	NA	NA	NA	NA	NA	NA	NA	NA	NA	NA	NA	NA	NA	NA
ANXA3	-1.5384	NA	NA	NA	NA	NA	NA	NA	NA	NA	2.28857	NA	-1.0754	NA	NA	-1.85139
ANXA9	2.37146	NA	NA	-2.34853	NA	-1.88776	-3.07946	-2.24596	-2.50725	NA	-2.4036	NA	NA	NA	NA	NA			Erlotinib core gene group
AOX1	-2.35331	NA	NA	NA	NA	NA	NA	NA	NA	NA	3.45483	NA	NA	1.82269	NA	NA
APOBEC3B	-1.61502	NA	NA	NA	NA	NA	NA	1.07567	NA	NA	NA	NA	-1.54829	NA	NA	NA			Erlotinib core gene group
ARG2	-2.98815	NA	NA	NA	NA	NA	NA	NA	NA	NA	NA	NA	NA	NA	NA	NA
ARHGAP24	2.0258	NA	NA	-1.6379	NA	NA	-1.36125	-1.37717	-1.295	NA	NA	NA	NA	NA	NA	NA		Cetuximab core Gene Group	Erlotinib core gene group
ARHGAP25	-2.23576	NA	NA	NA	NA	NA	2.09758	3.96411	3.32608	2.19204	3.81067	NA	NA	2.13143	NA	NA		Cetuximab core Gene Group
ARHGAP29	-1.28915	NA	NA	NA	NA	NA	NA	NA	NA	NA	1.43781	NA	NA	NA	NA	-1.43521
ARHGEF16	-1.1027	NA	NA	NA	NA	NA	NA	2.11749	1.34681	NA	2.52097	NA	NA	1.34399	NA	NA			Erlotinib core gene group
ARHGEF2	-1.41691	NA	NA	1.11057	NA	NA	NA	NA	NA	NA	NA	NA	NA	1.3087	NA	NA
ARHGEF37	1.28016	NA	NA	NA	NA	NA	-1.33543	-1.26312	NA	NA	NA	NA	NA	NA	NA	NA		Cetuximab core Gene Group	Erlotinib core gene group
ARID3A	-3.38265	NA	NA	2.19236	NA	NA	NA	3.32606	2.88853	NA	5.6328	NA	NA	2.39462	NA	NA			Erlotinib core gene group
ARID3B	-2.23282	NA	NA	NA	NA	NA	1.39735	1.9369	1.8212	1.09681	3.2454	NA	NA	1.13445	NA	NA		Cetuximab core Gene Group
ARID5B	1.49936	NA	1.11101	-1.06256	NA	NA	-1.74294	-1.14575	NA	NA	NA	NA	NA	NA	NA	NA		Cetuximab core Gene Group	Erlotinib core gene group
ARL4C	-1.16993	NA	NA	NA	NA	NA	1.34996	1.93959	1.58594	1.27272	1.77451	NA	NA	NA	NA	NA		Cetuximab core Gene Group
ARRDC3	2.10106	NA	1.31434	NA	NA	NA	NA	NA	NA	NA	-2.06649	NA	NA	NA	NA	NA
ASAH1	1.0551	NA	NA	NA	NA	NA	NA	-1.34358	NA	NA	NA	NA	NA	NA	NA	NA			Erlotinib core gene group
ASAP3	3.63281	NA	NA	-2.50691	NA	-3.02721	-4.02757	-3.39514	-3.34194	NA	-2.67956	NA	NA	NA	NA	NA			Erlotinib core gene group
ASNS	-2.71864	NA	-1.56796	1.86718	NA	NA	2.55512	2.25514	2.42515	NA	1.66752	NA	NA	NA	NA	NA		Cetuximab core Gene Group	Erlotinib core gene group
ATAD3A	-1.13521	NA	NA	NA	NA	NA	1.11507	1.68534	1.31359	NA	1.08535	NA	NA	NA	NA	NA		Cetuximab core Gene Group	Erlotinib core gene group
ATAD3B	-1.41868	NA	NA	NA	NA	NA	1.28833	1.86832	1.30988	1.05951	1.44022	NA	NA	NA	NA	NA		Cetuximab core Gene Group
ATF4	-1.0199	NA	NA	NA	NA	NA	1.0322	NA	NA	NA	NA	NA	NA	NA	NA	NA		Cetuximab core Gene Group
ATP2B4	3.13572	NA	NA	-2.60732	NA	NA	-3.22453	-3.22332	-2.53483	-1.11459	NA	NA	2.09992	-1.65726	NA	NA		Cetuximab core Gene Group
ATP6V1C2	2.25898	NA	NA	-2.05668	NA	NA	-2.35404	NA	NA	NA	NA	NA	NA	NA	NA	NA		Cetuximab core Gene Group
AXL	-2.25718	NA	-1.14359	1.01468	NA	NA	1.74241	1.97452	1.48476	NA	1.60164	NA	-1.62569	NA	NA	NA		Cetuximab core Gene Group	Erlotinib core gene group
B3GALT4	2.44788	NA	NA	-2.48005	NA	NA	-2.99969	-2.8622	-2.42279	NA	NA	NA	NA	NA	NA	NA		Cetuximab core Gene Group	Erlotinib core gene group
B3GNT3	-1.96211	NA	NA	1.38827	NA	NA	1.1719	3.2177	1.74481	1.38055	3.11293	NA	-1.842	2.02417	NA	NA		Cetuximab core Gene Group
B3GNT7	3.71583	NA	NA	-3.45864	NA	-3.79573	-4.47082	-3.81808	-4.61507	-2.86543	-3.04226	NA	NA	NA	NA	NA
BAALC-AS1	1.06041	NA	NA	NA	NA	NA	NA	NA	NA	NA	NA	NA	NA	NA	NA	NA
BAIAP2-AS1	1.15992	NA	NA	NA	NA	NA	-1.27706	NA	-1.42821	NA	-1.35352	NA	NA	NA	NA	NA		Cetuximab core Gene Group
BAZ2B	1.00308	NA	NA	NA	NA	NA	-1.03959	NA	NA	NA	NA	NA	NA	NA	NA	NA		Cetuximab core Gene Group
BCAR1	-1.09215	NA	NA	NA	NA	NA	NA	NA	NA	NA	1.37231	NA	NA	NA	NA	NA
BCL2L1	-1.41601	NA	NA	1.14117	NA	NA	NA	NA	NA	NA	1.81907	NA	NA	1.2138	NA	NA
BCL2L11	1.51588	NA	NA	-1.11993	NA	-1.01662	-1.49118	-1.61962	-1.37209	NA	-1.58033	NA	NA	-1.002	NA	NA			Erlotinib core gene group
BCL6	1.37899	NA	NA	-1.06517	NA	-1.0102	-1.35921	-1.5108	-1.32893	-1.04024	-1.40314	NA	NA	-1.09566	NA	NA
BDH2	1.35427	NA	NA	-1.11609	NA	NA	-1.275	-1.30404	-1.24333	NA	-1.22768	NA	NA	NA	NA	NA		Cetuximab core Gene Group	Erlotinib core gene group
BEST1	1.68196	NA	NA	NA	NA	NA	NA	NA	NA	NA	NA	NA	NA	NA	NA	NA
BHLHE41	2.6581	NA	1.20124	-1.47959	NA	-1.17349	-2.35648	-1.90081	-1.92593	-1.02349	-2.61584	NA	NA	-1.32453	NA	NA
BIK	-1.39305	NA	NA	NA	NA	NA	1.1932	1.4575	1.47156	NA	1.8821	NA	NA	NA	NA	NA		Cetuximab core Gene Group	Erlotinib core gene group
BIRC3	-2.58796	NA	NA	NA	NA	NA	NA	1.54087	NA	NA	3.17096	NA	-2.40469	NA	-1.6386	-2.28738			Erlotinib core gene group
BMF	4.63324	NA	NA	-3.83878	NA	-3.30567	-4.94881	-5.50326	-5.64968	-3.84865	-4.33893	NA	1.69368	-4.4068	NA	NA
BMP7	1.49335	NA	NA	NA	NA	NA	NA	-1.07111	NA	NA	-1.60828	NA	1.1208	NA	NA	NA			Erlotinib core gene group
BMT2	1.00701	NA	NA	NA	NA	NA	NA	-1.32301	NA	NA	NA	NA	NA	NA	NA	NA			Erlotinib core gene group
BNIP3	-1.92579	NA	NA	NA	NA	NA	NA	NA	NA	NA	2.43562	NA	NA	NA	NA	-1.87749
BOC	1.50594	NA	NA	NA	NA	NA	NA	-1.39742	NA	NA	NA	NA	1.24772	NA	NA	NA			Erlotinib core gene group
BOP1	-1.31973	NA	NA	NA	NA	NA	1.37264	2.22828	1.7746	1.06878	NA	NA	-1.16761	NA	NA	NA		Cetuximab core Gene Group
BPHL	1.33843	NA	NA	NA	NA	NA	-1.12359	-1.03815	-1.11507	NA	-1.25685	NA	NA	NA	NA	NA		Cetuximab core Gene Group	Erlotinib core gene group
BTG2	1.56595	NA	NA	NA	NA	NA	-1.7849	-2.07959	-1.44378	-1.07006	NA	NA	NA	NA	NA	NA		Cetuximab core Gene Group
BTN2A3P	1.00161	NA	NA	NA	NA	NA	-1.00413	NA	-1.0927	NA	NA	NA	NA	NA	NA	NA		Cetuximab core Gene Group
BTN3A1	1.043	NA	NA	-1.38697	NA	-1.10466	-1.65989	-1.67454	-1.72014	NA	NA	NA	NA	-1.01566	NA	NA			Erlotinib core gene group
BTN3A2	1.16331	NA	NA	-1.2022	NA	NA	-1.47891	-1.61079	-1.61046	NA	NA	NA	NA	NA	NA	NA		Cetuximab core Gene Group	Erlotinib core gene group
BTN3A3	1.73042	NA	NA	-2.09583	NA	-2.04494	-2.56716	-2.54216	-2.64986	-1.26967	NA	NA	1.26459	-1.31731	NA	-1.52317
BYSL	-1.0165	NA	NA	NA	NA	NA	NA	1.29192	1.22624	NA	1.13736	NA	NA	NA	NA	NA			Erlotinib core gene group
C10orf10	2.02261	NA	NA	NA	NA	NA	-2.72315	-1.91848	-2.12169	NA	NA	NA	NA	NA	NA	NA		Cetuximab core Gene Group	Erlotinib core gene group
C15orf39	-1.61204	NA	NA	NA	NA	NA	1.12444	1.00208	NA	NA	NA	NA	NA	NA	NA	NA		Cetuximab core Gene Group	Erlotinib core gene group
C16orf74	-1.21664	NA	NA	1.07649	NA	NA	NA	1.35291	NA	1.03091	1.13823	NA	NA	1.33589	NA	NA
C19orf48	-1.15166	NA	NA	NA	NA	NA	NA	1.28609	1.15614	NA	NA	NA	NA	NA	NA	NA			Erlotinib core gene group
C1QBP	-1.04652	NA	NA	NA	NA	NA	1.08958	1.06707	1.27522	NA	NA	NA	NA	NA	NA	NA		Cetuximab core Gene Group	Erlotinib core gene group
C1R	2.00186	NA	NA	-3.79351	NA	-3.02889	-3.15134	-2.94229	-3.13017	-1.84038	NA	NA	1.10108	-2.65567	NA	NA
C1RL	1.35818	NA	NA	-1.00166	NA	NA	-1.47838	-1.32044	-1.54845	NA	NA	NA	NA	NA	NA	NA		Cetuximab core Gene Group	Erlotinib core gene group
C2CD2L	-1.42127	NA	NA	NA	NA	NA	1.11632	1.2929	NA	NA	1.18067	NA	NA	NA	NA	NA		Cetuximab core Gene Group	Erlotinib core gene group
C2orf48	-1.76611	NA	NA	NA	NA	NA	NA	NA	NA	NA	NA	NA	NA	NA	NA	NA
C5	1.52893	NA	NA	NA	NA	NA	-1.06385	NA	NA	NA	-1.63865	NA	NA	NA	NA	NA		Cetuximab core Gene Group
C9orf3	1.80939	NA	NA	-1.30797	NA	NA	-1.84919	-1.50917	-1.30045	NA	-1.26442	NA	NA	-1.0201	NA	NA		Cetuximab core Gene Group	Erlotinib core gene group
CA11	1.70019	NA	NA	NA	NA	NA	NA	NA	NA	NA	NA	NA	NA	NA	NA	NA
CACFD1	2.16733	NA	NA	NA	NA	NA	-2.72468	-2.28719	-2.09579	NA	NA	NA	NA	NA	NA	NA		Cetuximab core Gene Group	Erlotinib core gene group
CALML3	1.69996	NA	NA	NA	NA	NA	NA	-1.08309	NA	NA	-1.71211	NA	NA	-1.05228	NA	NA			Erlotinib core gene group
CALML5	6.35446	NA	NA	-3.73778	NA	-4.16715	-5.59075	-4.81074	-4.1393	NA	NA	NA	1.81716	NA	NA	NA			Erlotinib core gene group
CAMK2N1	1.23353	NA	NA	NA	NA	NA	-1.19121	-1.13133	NA	NA	NA	NA	1.68145	NA	NA	NA		Cetuximab core Gene Group	Erlotinib core gene group
CAPN15	-1.09749	NA	NA	NA	NA	NA	1.02533	1.68471	1.19017	NA	1.23013	NA	NA	NA	NA	NA		Cetuximab core Gene Group	Erlotinib core gene group
CAPN2	-1.20558	NA	NA	NA	NA	NA	NA	1.1155	NA	NA	1.34653	NA	NA	NA	NA	NA			Erlotinib core gene group
CAPN5	1.82512	NA	NA	NA	NA	NA	-1.97739	-1.64592	-1.92243	NA	-1.99692	NA	NA	NA	NA	NA		Cetuximab core Gene Group	Erlotinib core gene group
CAPS	1.72678	NA	NA	NA	NA	NA	-1.61265	-1.54905	-1.8033	NA	NA	NA	NA	NA	NA	NA		Cetuximab core Gene Group	Erlotinib core gene group
CAPS2	1.08768	NA	NA	NA	NA	NA	-1.31458	-1.05448	-1.34789	NA	-1.37369	NA	NA	NA	NA	NA		Cetuximab core Gene Group	Erlotinib core gene group
CARD10	-1.12615	NA	NA	NA	NA	NA	1.18161	1.85586	1.17098	1.11908	1.21232	NA	NA	NA	NA	NA		Cetuximab core Gene Group
CARD16	1.76332	NA	NA	-1.0627	NA	NA	-1.58631	-1.807	-1.32325	NA	NA	NA	NA	NA	NA	NA		Cetuximab core Gene Group	Erlotinib core gene group
CARF	1.54482	NA	1.00733	NA	NA	NA	-1.33069	-1.23304	-1.39748	NA	-1.76491	NA	NA	NA	NA	NA		Cetuximab core Gene Group	Erlotinib core gene group
CARS	-1.05581	NA	NA	NA	NA	NA	NA	NA	NA	NA	NA	NA	NA	NA	NA	NA
CASC1	1.81721	NA	NA	NA	NA	NA	-1.71254	-1.75258	-1.88001	NA	-2.35226	NA	NA	NA	NA	NA		Cetuximab core Gene Group	Erlotinib core gene group
CASC19	-4.5332	NA	NA	NA	NA	NA	3.61393	5.57427	5.67623	3.67315	7.06125	NA	NA	3.74736	NA	NA		Cetuximab core Gene Group
CASC9	1.08781	NA	NA	NA	NA	NA	NA	-1.0535	NA	NA	NA	NA	NA	NA	NA	NA			Erlotinib core gene group
CAT	1.78021	NA	NA	-1.32762	NA	-1.06277	-1.75493	-1.46408	-1.21481	NA	-1.63079	NA	NA	NA	NA	NA			Erlotinib core gene group
CATSPERE	2.07188	NA	NA	NA	NA	NA	-2.32984	-2.32631	-2.03559	NA	NA	NA	NA	NA	NA	NA		Cetuximab core Gene Group	Erlotinib core gene group
CBLB	1.07137	NA	1.00022	NA	NA	NA	-1.01366	-1.00495	NA	NA	NA	NA	NA	NA	NA	NA		Cetuximab core Gene Group	Erlotinib core gene group
CBR3	1.35133	NA	NA	NA	NA	NA	NA	NA	NA	NA	NA	NA	NA	NA	NA	NA
CBR3-AS1	1.37359	NA	NA	NA	NA	NA	-1.41131	NA	NA	NA	NA	NA	NA	NA	NA	NA		Cetuximab core Gene Group
CCAT1	-3.80729	NA	-1.7341	NA	NA	NA	2.79407	4.80435	5.02717	2.87959	6.51659	NA	-1.93994	3.10135	NA	NA		Cetuximab core Gene Group
CCDC146	2.11969	NA	NA	NA	NA	NA	-1.79767	-1.94024	-1.80954	NA	NA	NA	NA	NA	NA	NA		Cetuximab core Gene Group	Erlotinib core gene group
CCDC148	1.55532	NA	NA	NA	NA	NA	-1.13957	NA	NA	NA	NA	NA	NA	NA	NA	NA		Cetuximab core Gene Group
CCDC162P	1.10277	NA	NA	NA	NA	NA	-1.15206	NA	-1.1151	NA	NA	NA	NA	NA	NA	NA		Cetuximab core Gene Group
CCDC18-AS1	1.01567	NA	NA	NA	NA	NA	NA	NA	NA	NA	NA	NA	NA	NA	NA	NA
CCDC191	1.21785	NA	NA	NA	NA	NA	-1.06192	NA	-1.069	NA	NA	NA	NA	NA	NA	NA		Cetuximab core Gene Group
CCDC69	-1.25438	NA	NA	NA	NA	NA	NA	NA	NA	NA	NA	NA	NA	NA	NA	NA
CCDC80	2.75607	NA	NA	-2.81863	NA	-2.91282	-3.62057	-2.39851	-2.43079	-1.58457	-1.68437	NA	NA	-1.48522	NA	NA
CCDC86	-1.31303	NA	NA	NA	NA	NA	1.20168	1.30996	1.41489	NA	1.28674	NA	NA	NA	NA	NA		Cetuximab core Gene Group	Erlotinib core gene group
CCND1	-1.49752	NA	NA	NA	NA	NA	1.353	1.39257	1.51939	NA	1.91187	NA	NA	NA	NA	NA		Cetuximab core Gene Group	Erlotinib core gene group
CD24	1.7194	NA	NA	-1.86028	NA	-2.16113	-2.1621	-1.76141	-1.43119	-1.79178	-1.17123	NA	NA	-1.48733	NA	NA
CD302	1.39138	NA	NA	NA	NA	NA	NA	-1.10454	NA	NA	NA	NA	NA	NA	NA	NA			Erlotinib core gene group
CD320	-1.25404	NA	NA	NA	NA	NA	1.32659	1.62872	1.82066	NA	NA	NA	NA	NA	NA	NA		Cetuximab core Gene Group	Erlotinib core gene group
CD3EAP	-1.26828	NA	-1.00231	NA	NA	NA	1.50021	1.76923	1.55278	NA	1.21575	NA	-1.04061	NA	NA	NA		Cetuximab core Gene Group	Erlotinib core gene group
CD55	-1.06287	NA	NA	1.13328	NA	NA	NA	NA	NA	NA	NA	NA	NA	NA	NA	NA
CD83	-1.17423	NA	NA	NA	NA	NA	NA	NA	NA	NA	1.24589	NA	NA	NA	NA	NA
CDC42EP1	-2.0434	NA	NA	1.29532	NA	1.20083	2.20014	2.83573	2.7061	1.74955	2.41739	NA	NA	1.84451	NA	NA
CDC42EP2	-1.9332	NA	NA	NA	NA	NA	1.48738	1.95816	1.5108	1.18593	2.02256	NA	NA	1.02164	NA	NA		Cetuximab core Gene Group
CDC45	-1.01247	NA	NA	NA	NA	NA	NA	1.00521	1.02126	NA	NA	NA	NA	NA	NA	NA			Erlotinib core gene group
CDH12	1.10701	NA	NA	NA	NA	NA	NA	NA	NA	NA	-1.37822	NA	NA	NA	NA	NA
CDH13	-1.25924	NA	NA	NA	NA	NA	NA	1.1373	1.12291	NA	1.79403	NA	NA	1.30674	NA	NA			Erlotinib core gene group
CDH23	3.04146	NA	NA	-2.94689	NA	-1.83454	-2.72104	-3.58686	-3.6114	NA	-4.73473	NA	NA	-2.97934	NA	NA			Erlotinib core gene group
CDH5	3.32131	NA	NA	NA	NA	-4.54273	NA	NA	NA	NA	NA	NA	NA	NA	NA	NA
CDK19	1.15844	NA	NA	NA	NA	NA	NA	NA	NA	NA	-1.31447	NA	NA	NA	NA	NA
CDK5R1	-1.00246	NA	NA	NA	NA	NA	NA	NA	NA	NA	NA	NA	NA	NA	NA	NA
CDK6	-1.07806	NA	NA	NA	NA	NA	NA	NA	1.02739	NA	1.27769	NA	NA	NA	NA	NA
CEBPA	1.49124	NA	NA	-1.11871	NA	NA	-1.17816	-1.36668	NA	NA	-1.3937	NA	NA	-1.3796	NA	NA		Cetuximab core Gene Group	Erlotinib core gene group
CEBPD	1.28134	NA	NA	NA	NA	NA	NA	-1.2326	NA	-1.19215	NA	NA	NA	-1.16741	NA	NA
CENPV	-1.17204	NA	NA	NA	NA	NA	1.13231	1.39486	1.40989	NA	NA	NA	NA	NA	NA	NA		Cetuximab core Gene Group	Erlotinib core gene group
CEP112	1.06793	NA	NA	NA	NA	NA	NA	NA	NA	NA	NA	NA	NA	NA	NA	NA
CEP126	1.27219	NA	NA	NA	NA	NA	NA	-1.13033	NA	NA	-1.58753	NA	NA	NA	NA	NA			Erlotinib core gene group
CEP68	1.16213	NA	NA	NA	NA	NA	NA	-1.14119	NA	NA	-1.4322	NA	NA	NA	NA	NA			Erlotinib core gene group
CERCAM	1.3349	NA	NA	-1.09745	NA	NA	-1.16163	-1.27216	-1.39103	NA	NA	NA	NA	NA	NA	NA		Cetuximab core Gene Group	Erlotinib core gene group
CFAP43	1.70015	NA	1.39261	NA	NA	NA	-1.50692	-1.11427	-1.34393	NA	-1.72917	NA	NA	NA	NA	NA		Cetuximab core Gene Group	Erlotinib core gene group
CFAP54	1.19534	NA	1.24478	NA	NA	NA	NA	NA	NA	NA	NA	NA	1.22062	NA	NA	NA
CFAP57	2.11369	NA	NA	NA	NA	NA	-2.18287	-1.32306	-1.79983	NA	NA	NA	NA	NA	NA	NA		Cetuximab core Gene Group	Erlotinib core gene group
CFAP70	2.27151	NA	NA	NA	NA	NA	-2.13259	-2.01883	-2.11809	NA	-1.85035	NA	1.65074	NA	NA	NA		Cetuximab core Gene Group	Erlotinib core gene group
CFI	4.8744	NA	NA	NA	NA	-5.96878	-6.93402	-5.09636	-6.23095	NA	-4.09409	NA	NA	NA	NA	NA			Erlotinib core gene group
CHD6	1.00617	NA	NA	NA	NA	NA	NA	NA	NA	NA	NA	NA	NA	NA	NA	NA
CHTF18	-1.06232	NA	NA	NA	NA	NA	NA	1.4587	NA	NA	NA	NA	NA	NA	NA	NA			Erlotinib core gene group
CKB	1.83427	NA	NA	-1.74083	NA	NA	-1.68854	-1.62867	NA	NA	NA	NA	NA	-1.33168	NA	NA		Cetuximab core Gene Group	Erlotinib core gene group
CLCA2	4.29997	NA	1.6704	-3.16933	NA	-1.54411	-3.19418	-1.58845	-1.11739	NA	-1.63818	NA	1.64308	-1.5598	1.62782	NA			Erlotinib core gene group
CLCF1	-1.30471	NA	NA	NA	NA	NA	1.33177	1.10892	NA	NA	NA	NA	NA	NA	NA	NA		Cetuximab core Gene Group	Erlotinib core gene group
CLDN1	3.64527	NA	NA	-3.02152	NA	-4.81406	-5.6113	-3.80207	-3.60088	-2.84357	NA	NA	NA	NA	NA	-2.00206
CLDN16	3.39887	NA	NA	-3.27904	NA	-4.32294	-5.49111	-3.65782	-3.75336	-2.83897	NA	NA	NA	NA	NA	NA
CLEC12A	1.53213	NA	NA	-1.27038	NA	NA	-1.86908	-1.64707	-1.52221	NA	NA	NA	NA	NA	NA	NA		Cetuximab core Gene Group	Erlotinib core gene group
CLEC2B	1.47856	NA	NA	-1.11757	NA	NA	-1.26994	-1.57553	-1.26835	NA	NA	NA	NA	NA	NA	NA		Cetuximab core Gene Group	Erlotinib core gene group
CLIC3	4.28197	NA	NA	-4.18838	NA	-5.61985	-6.57931	-4.70317	-5.14322	-3.96177	NA	NA	NA	NA	NA	NA
CLU	3.25658	NA	1.67149	-1.59457	NA	-1.33263	-2.97206	-1.93706	-1.97033	NA	-3.01379	NA	1.16433	-1.01293	NA	NA			Erlotinib core gene group
CNOT6LP1	1.50125	NA	NA	NA	NA	NA	-1.91357	-2.11658	-1.7186	NA	NA	NA	1.27983	NA	NA	NA		Cetuximab core Gene Group	Erlotinib core gene group
COBLL1	1.10901	NA	NA	NA	NA	NA	-1.11828	NA	NA	NA	NA	NA	NA	NA	NA	NA		Cetuximab core Gene Group
COL4A5	1.32283	NA	NA	NA	NA	NA	-1.45814	-1.19362	-1.1865	NA	NA	NA	NA	NA	NA	NA		Cetuximab core Gene Group	Erlotinib core gene group
COL5A2	1.93892	NA	NA	-1.69479	NA	-1.2061	-1.50879	-1.24868	-1.5866	NA	-2.38405	NA	NA	-1.15988	NA	NA			Erlotinib core gene group
COLCA1	4.17693	NA	NA	NA	NA	NA	-3.76518	-3.83692	-3.24023	NA	-5.22318	NA	2.76437	NA	NA	NA		Cetuximab core Gene Group	Erlotinib core gene group
COPZ2	1.24399	NA	NA	NA	NA	NA	NA	-1.06463	NA	NA	-1.32993	NA	NA	NA	NA	NA			Erlotinib core gene group
COTL1	-1.78163	NA	-1.10674	NA	NA	NA	1.55943	1.95474	1.68384	NA	1.4064	NA	-1.57287	NA	NA	NA		Cetuximab core Gene Group	Erlotinib core gene group
CPE	2.36922	NA	NA	NA	NA	NA	-1.6329	-1.52727	-1.5427	NA	-2.971	NA	NA	NA	NA	NA		Cetuximab core Gene Group	Erlotinib core gene group
CPLX1	-1.0398	NA	NA	NA	NA	NA	NA	1.29449	1.03005	NA	NA	NA	NA	NA	NA	NA			Erlotinib core gene group
CREG1	1.73284	NA	NA	-1.13099	NA	-1.12025	-1.68528	-1.83769	-1.63983	NA	-1.88054	NA	NA	NA	NA	NA			Erlotinib core gene group
CRIP2	1.00008	NA	NA	NA	NA	NA	NA	NA	NA	NA	-1.61075	NA	NA	NA	NA	1.0917
CRISPLD1	1.13452	NA	NA	NA	NA	NA	-1.05799	-1.31304	-1.06334	NA	-1.07944	NA	NA	NA	NA	NA		Cetuximab core Gene Group	Erlotinib core gene group
CROT	1.21271	NA	NA	NA	NA	NA	-1.06615	-1.01225	NA	NA	-1.05459	NA	NA	NA	NA	NA		Cetuximab core Gene Group	Erlotinib core gene group
CSF1	1.03467	NA	NA	-1.64033	NA	-1.54668	-1.43479	-1.14696	-1.34464	NA	-1.41109	NA	NA	-1.05093	NA	NA			Erlotinib core gene group
CSF2	-5.34988	NA	NA	3.16601	NA	2.16596	3.42255	4.5799	4.17955	NA	6.89669	NA	-3.40374	2.17194	NA	NA			Erlotinib core gene group
CSNK1E	-1.10339	NA	NA	NA	NA	NA	NA	NA	NA	NA	NA	NA	NA	NA	NA	NA
CSRNP1	-2.09939	NA	NA	NA	NA	NA	1.22455	NA	NA	NA	NA	NA	NA	NA	NA	NA		Cetuximab core Gene Group
CSTA	-1.36484	NA	NA	1.11377	NA	NA	1.19054	NA	1.28208	NA	1.48735	NA	NA	NA	NA	NA		Cetuximab core Gene Group
CTH	-1.95653	NA	-1.01187	NA	NA	NA	NA	2.27946	NA	NA	NA	NA	-2.05428	NA	NA	NA			Erlotinib core gene group
CTNNAL1	-1.07419	NA	NA	NA	NA	NA	NA	1.22394	1.16492	NA	NA	NA	-1.10951	NA	NA	NA			Erlotinib core gene group
CTSD	1.8935	NA	NA	-1.38153	NA	NA	-1.51933	-1.78266	-1.77826	NA	-2.28715	NA	1.07504	-1.1118	NA	NA		Cetuximab core Gene Group	Erlotinib core gene group
CTSO	3.08654	NA	NA	NA	NA	NA	-2.85065	-3.6554	-3.35164	-1.54241	NA	NA	2.1284	-2.11601	NA	NA		Cetuximab core Gene Group
CXXC5	1.67872	NA	NA	-1.41186	NA	NA	-1.04663	-1.43913	-1.20754	NA	-2.41595	NA	NA	-1.40808	NA	1.20511		Cetuximab core Gene Group	Erlotinib core gene group
CYBRD1	1.24539	NA	NA	NA	NA	NA	-1.12076	-1.45425	NA	NA	NA	NA	NA	NA	NA	NA		Cetuximab core Gene Group	Erlotinib core gene group
CYSRT1	-1.45594	NA	NA	NA	NA	1.10317	1.67647	1.69773	NA	NA	NA	NA	NA	NA	NA	NA			Erlotinib core gene group
DAPK2	1.60435	NA	NA	NA	NA	NA	-1.1734	-1.14319	-1.7434	NA	-1.3649	NA	NA	NA	NA	NA		Cetuximab core Gene Group	Erlotinib core gene group
DBP	2.09904	NA	2.14552	NA	NA	NA	-2.63553	-2.31646	-2.86395	NA	-2.98551	NA	1.47877	NA	NA	NA		Cetuximab core Gene Group	Erlotinib core gene group
DDAH1	-1.23728	NA	NA	NA	NA	NA	1.01643	NA	NA	NA	NA	NA	NA	NA	NA	NA		Cetuximab core Gene Group
DDO	1.85556	NA	NA	NA	NA	-2.09111	-3.00445	-2.92493	-2.87765	-1.91717	NA	NA	NA	NA	NA	NA
DDX39A	-1.03867	NA	NA	NA	NA	NA	1.01852	1.00324	NA	NA	NA	NA	NA	NA	NA	NA		Cetuximab core Gene Group	Erlotinib core gene group
DKC1	-1.0052	NA	NA	NA	NA	NA	1.10453	1.50016	1.29748	NA	NA	NA	-1.02134	NA	NA	NA		Cetuximab core Gene Group	Erlotinib core gene group
DLK2	1.66756	NA	NA	-2.13567	NA	-1.61474	-2.05692	-2.71748	-2.43598	-1.21193	-3.46798	NA	1.49438	-1.71595	NA	NA
DNAH1	1.61265	NA	NA	NA	NA	NA	-2.00143	-1.95434	-2.25442	NA	-2.00785	NA	NA	NA	NA	NA		Cetuximab core Gene Group	Erlotinib core gene group
DNAH7	1.61528	NA	1.43361	NA	NA	NA	NA	-1.01764	-1.15521	NA	-1.94637	NA	NA	NA	NA	NA			Erlotinib core gene group
DNMBP	-1.36383	NA	NA	NA	NA	NA	NA	1.11442	1.07701	1.17996	1.57027	NA	NA	1.29024	NA	NA
DOK3	-1.59104	NA	NA	NA	NA	NA	1.27629	1.94395	1.33158	NA	1.79438	NA	NA	NA	NA	NA		Cetuximab core Gene Group	Erlotinib core gene group
DOK7	-3.44613	NA	NA	NA	NA	NA	2.66619	3.4811	3.45408	2.02485	4.39308	NA	NA	2.38953	NA	NA		Cetuximab core Gene Group
DPY19L1P1	1.26421	NA	NA	NA	NA	NA	-1.2032	NA	NA	NA	NA	NA	NA	NA	NA	NA		Cetuximab core Gene Group
DPYD	1.34198	NA	NA	NA	NA	NA	-1.16147	-1.28851	-1.30446	NA	NA	NA	NA	NA	NA	NA		Cetuximab core Gene Group	Erlotinib core gene group
DRAP1	-1.12038	NA	NA	NA	NA	NA	1.23432	1.2212	1.11394	NA	NA	NA	NA	NA	NA	NA		Cetuximab core Gene Group	Erlotinib core gene group
DSG3	1.20453	NA	NA	NA	NA	NA	-1.02517	-1.24338	NA	NA	NA	NA	NA	NA	NA	NA		Cetuximab core Gene Group	Erlotinib core gene group
DTX4	2.09062	NA	NA	-2.01964	NA	-1.62291	-2.21111	-2.39207	-2.25267	-1.25288	-2.39618	NA	1.13	-1.64653	NA	NA
DUOX2	1.39444	NA	NA	-1.63286	NA	-1.3021	-1.88672	-1.21403	-1.44437	NA	NA	NA	NA	NA	NA	NA			Erlotinib core gene group
DUOXA1	1.18607	NA	NA	NA	NA	NA	-1.06292	NA	NA	NA	NA	NA	NA	NA	NA	NA		Cetuximab core Gene Group
DUSP10	1.11867	NA	NA	NA	NA	NA	-1.33829	-1.7531	-1.30507	-1.04536	NA	NA	NA	NA	NA	NA		Cetuximab core Gene Group
DUSP19	1.31214	NA	NA	NA	NA	NA	-1.28897	-1.58565	-1.81102	NA	-2.2806	NA	NA	-1.22241	NA	NA		Cetuximab core Gene Group	Erlotinib core gene group
DUSP4	-2.70013	NA	NA	1.61848	NA	1.61718	1.8811	2.78775	2.62616	1.76209	3.73639	NA	-1.03913	1.76484	NA	NA
DUSP6	-3.04406	NA	NA	1.93406	NA	1.97651	3.03745	3.36572	3.40828	2.85009	4.26161	NA	NA	2.80868	NA	NA
DUSP7	-1.78239	NA	NA	NA	NA	1.11856	1.50792	1.46877	1.83438	1.09848	2.76648	NA	NA	NA	NA	NA
DUSP9	3.29481	NA	NA	-2.57051	NA	-2.23832	-3.30774	-1.78082	-1.57631	NA	-2.35809	NA	NA	NA	NA	NA			Erlotinib core gene group
DVL1	-1.56124	NA	NA	NA	NA	NA	1.47233	1.94667	1.58348	1.2251	1.76647	NA	NA	1.2748	NA	NA		Cetuximab core Gene Group
EBNA1BP2	-1.06863	NA	NA	NA	NA	NA	1.08024	1.11155	1.0538	NA	NA	NA	NA	NA	NA	NA		Cetuximab core Gene Group	Erlotinib core gene group
ECE2	-1.01032	NA	NA	NA	NA	NA	1.31787	1.35476	1.57937	NA	1.39995	NA	NA	NA	NA	NA		Cetuximab core Gene Group	Erlotinib core gene group
ECH1	1.52555	NA	NA	-1.31471	NA	-1.54993	-1.64522	-1.51404	-1.22717	NA	-1.41096	NA	NA	NA	NA	NA			Erlotinib core gene group
ECHDC2	1.75974	NA	NA	-1.94258	NA	-1.68446	-2.03276	NA	-1.77968	NA	-1.8096	NA	NA	NA	NA	NA
ECM2	-2.44406	NA	-1.78733	NA	NA	NA	NA	NA	NA	NA	NA	NA	-2.92817	NA	NA	NA
EDAR	6.8755	NA	3.18779	NA	NA	NA	-6.69019	-5.07841	-5.0767	NA	-4.65494	NA	3.69456	NA	NA	NA		Cetuximab core Gene Group	Erlotinib core gene group
EDIL3	6.52286	NA	2.06545	-5.81638	NA	-3.73091	-5.78425	-5.91951	-5.21638	-3.42878	-7.12114	NA	2.48609	-5.52012	2.0551	NA
EFHD2	-1.0849	NA	NA	NA	NA	NA	NA	1.41696	1.03989	NA	1.02404	NA	NA	NA	NA	NA			Erlotinib core gene group
EGR2	1.8652	NA	NA	NA	2.90089	NA	NA	NA	NA	NA	-2.52786	NA	NA	NA	NA	1.97288
EHD1	-1.05345	NA	NA	NA	NA	NA	NA	NA	NA	NA	NA	NA	NA	NA	NA	NA
EIF1B-AS1	1.37109	NA	NA	NA	NA	NA	-1.29384	-1.37963	-1.44706	NA	NA	NA	NA	NA	NA	NA		Cetuximab core Gene Group	Erlotinib core gene group
EIF4EBP1	-1.67976	NA	NA	1.03922	NA	NA	1.4851	1.84298	1.54831	NA	1.10147	NA	-1.45242	NA	NA	NA		Cetuximab core Gene Group	Erlotinib core gene group
EIF5A	-1.19066	NA	NA	NA	NA	NA	1.09708	1.00616	1.11838	NA	NA	NA	NA	NA	NA	NA		Cetuximab core Gene Group	Erlotinib core gene group
ELF3	1.80263	NA	NA	-2.18556	NA	-1.85321	-2.37759	-2.59856	-2.83853	NA	-2.25321	NA	NA	-2.03535	NA	NA			Erlotinib core gene group
ELF3-AS1	1.97555	NA	NA	NA	NA	NA	-2.54097	-2.19465	-2.42694	NA	NA	NA	NA	NA	NA	NA		Cetuximab core Gene Group	Erlotinib core gene group
EMP1	-2.05008	NA	NA	1.13538	NA	1.19617	2.35475	2.1878	2.27113	1.28738	2.45406	NA	NA	1.22853	NA	NA
ENO1	-1.04149	NA	NA	NA	NA	NA	NA	NA	NA	NA	NA	NA	NA	NA	NA	NA
EPB41L1	2.07125	NA	NA	-1.54986	NA	-1.12754	-1.97254	-1.60068	-1.75846	NA	-2.24464	NA	NA	NA	NA	NA			Erlotinib core gene group
EPB41L4A	2.85337	NA	NA	NA	NA	NA	-3.96309	-3.20887	-3.6987	NA	-4.78107	NA	NA	NA	NA	NA		Cetuximab core Gene Group	Erlotinib core gene group
EPHA2	-1.93562	NA	NA	NA	NA	NA	1.46741	2.17815	1.6426	NA	2.43517	NA	-1.28051	1.16628	NA	NA		Cetuximab core Gene Group	Erlotinib core gene group
EPHA4	2.43009	NA	1.63513	NA	NA	NA	-2.44459	-2.26015	-1.8472	NA	-2.46971	NA	1.83831	NA	NA	NA		Cetuximab core Gene Group	Erlotinib core gene group
EPHB3	2.11443	NA	NA	-1.93532	NA	-1.44257	-2.34064	-2.08091	-1.98421	-1.00606	NA	NA	1.06899	-1.50196	NA	NA
EPHX1	1.4046	NA	NA	NA	NA	NA	NA	NA	NA	NA	-1.81289	NA	NA	NA	NA	NA
EREG	-1.32798	NA	NA	1.40265	NA	1.39064	2.14618	2.37641	2.46439	1.43445	2.30074	NA	NA	1.44697	NA	NA
ERMAP	1.39064	NA	NA	NA	NA	NA	-1.22085	-1.19815	-1.2477	NA	-1.24643	NA	NA	NA	NA	NA		Cetuximab core Gene Group	Erlotinib core gene group
ETS1	-2.23317	NA	NA	1.43549	NA	NA	1.5514	1.68834	1.40408	NA	2.44009	NA	-1.16778	1.06233	NA	NA		Cetuximab core Gene Group	Erlotinib core gene group
ETV4	-3.14479	NA	-1.47721	1.7842	NA	1.77853	3.23812	4.0776	4.13742	2.22921	3.90898	NA	-1.8612	2.2377	NA	NA
ETV5	-2.61613	NA	-1.14664	1.89521	NA	1.583	2.73014	3.49393	3.4137	1.81679	3.05821	NA	-1.69229	2.13068	NA	NA
EXOSC4	-1.24755	NA	NA	NA	NA	NA	1.12895	1.35114	NA	NA	NA	NA	NA	NA	NA	NA		Cetuximab core Gene Group	Erlotinib core gene group
F3	-1.53712	NA	-1.10119	NA	NA	NA	1.5512	1.68637	1.71154	NA	2.0987	NA	-1.32121	NA	NA	NA		Cetuximab core Gene Group	Erlotinib core gene group
F8	1.74322	NA	1.33895	NA	NA	NA	-1.57945	-1.26075	-1.2379	NA	-1.59011	NA	NA	NA	NA	NA		Cetuximab core Gene Group	Erlotinib core gene group
FAM102B	1.11643	NA	NA	NA	NA	NA	NA	-1.14636	NA	NA	-1.52664	NA	NA	NA	NA	NA			Erlotinib core gene group
FAM107B	-2.21024	NA	-1.07086	1.5997	NA	1.13196	2.19874	2.37297	2.04101	NA	1.93636	NA	-1.49865	1.35631	NA	NA			Erlotinib core gene group
FAM122C	1.65732	NA	NA	-1.30233	NA	NA	-1.66693	-1.18763	-1.17777	NA	NA	NA	NA	-1.13762	NA	NA		Cetuximab core Gene Group	Erlotinib core gene group
FAM129B	-1.66193	NA	NA	NA	NA	NA	1.29695	2.26979	1.7521	1.0971	2.46414	NA	-1.18369	1.17523	NA	NA		Cetuximab core Gene Group
FAM167A	-2.0775	NA	NA	1.40535	NA	NA	1.5815	NA	NA	NA	NA	NA	-1.17475	NA	NA	NA		Cetuximab core Gene Group
FAM183A	1.65843	NA	NA	NA	NA	NA	-1.87203	NA	NA	NA	NA	NA	NA	NA	NA	NA		Cetuximab core Gene Group
FAM207A	-1.00881	NA	NA	NA	NA	NA	1.10416	1.3975	1.13143	NA	NA	NA	NA	NA	NA	NA		Cetuximab core Gene Group	Erlotinib core gene group
FAM212B	1.34203	NA	NA	NA	NA	NA	-1.10142	-1.05127	NA	NA	-1.14001	NA	NA	NA	NA	NA		Cetuximab core Gene Group	Erlotinib core gene group
FAM214A	1.45505	NA	1.15994	NA	NA	NA	-1.64563	-1.50796	-1.61538	NA	NA	NA	NA	NA	NA	NA		Cetuximab core Gene Group	Erlotinib core gene group
FAM216A	-1.16171	NA	NA	NA	NA	NA	1.12234	1.61157	1.66359	NA	NA	NA	NA	NA	NA	NA		Cetuximab core Gene Group	Erlotinib core gene group
FAM228B	1.25587	NA	NA	NA	NA	NA	-1.56062	-1.53582	-1.63762	NA	NA	NA	NA	NA	NA	NA		Cetuximab core Gene Group	Erlotinib core gene group
FAM46C	1.68661	NA	NA	NA	NA	NA	-1.4167	-1.22135	-1.44926	NA	NA	NA	NA	NA	NA	NA		Cetuximab core Gene Group	Erlotinib core gene group
FAM49A	2.63924	NA	NA	-1.57187	NA	NA	-1.84132	-2.92479	-2.30721	-1.32805	-3.95929	NA	1.58758	-2.21242	NA	NA		Cetuximab core Gene Group
FAM83F	1.08551	NA	NA	NA	NA	NA	NA	NA	NA	NA	NA	NA	NA	NA	NA	NA
FAM84B	-1.51657	NA	NA	1.07826	NA	NA	1.27256	1.1367	1.16196	NA	1.42998	NA	NA	NA	NA	NA		Cetuximab core Gene Group	Erlotinib core gene group
FAM86DP	-1.17454	NA	NA	NA	NA	NA	1.37575	1.86586	1.31717	1.11566	NA	NA	NA	1.15829	NA	NA		Cetuximab core Gene Group
FANK1	1.49305	NA	NA	NA	NA	NA	-1.26107	-1.31487	-1.49028	NA	-1.81057	NA	NA	NA	NA	NA		Cetuximab core Gene Group	Erlotinib core gene group
FAR2P1	1.20666	NA	NA	NA	NA	NA	-1.5697	NA	NA	NA	NA	NA	NA	NA	NA	NA		Cetuximab core Gene Group
FAXDC2	4.1561	NA	NA	-2.69238	NA	-2.1811	-4.79062	-4.89538	-4.95966	-2.27936	-3.74677	NA	2.57424	-2.8035	NA	NA
FBXL6	-1.32766	NA	NA	NA	NA	NA	NA	1.00945	NA	NA	NA	NA	NA	NA	NA	NA			Erlotinib core gene group
FBXO32	2.48324	NA	NA	-2.35449	NA	-1.66197	-1.97394	-2.61796	-2.35279	-1.84332	-2.35586	NA	NA	-2.53338	NA	NA
FLG-AS1	2.97919	NA	NA	NA	NA	NA	-2.67654	-4.08617	NA	NA	NA	NA	2.36918	NA	NA	NA		Cetuximab core Gene Group	Erlotinib core gene group
FLNA	-1.18013	NA	NA	NA	NA	NA	NA	1.09016	NA	NA	1.01069	NA	NA	NA	NA	NA			Erlotinib core gene group
FLVCR2	1.94876	NA	NA	NA	NA	NA	NA	-1.13479	NA	NA	NA	NA	NA	NA	NA	NA			Erlotinib core gene group
FNBP1L	1.28389	NA	NA	NA	NA	NA	-1.26726	-1.29703	-1.1323	NA	NA	NA	NA	NA	NA	NA		Cetuximab core Gene Group	Erlotinib core gene group
FOLR1	2.99186	NA	NA	-3.39524	NA	NA	-3.40711	-3.03764	-3.64025	NA	-4.23221	NA	NA	NA	NA	NA		Cetuximab core Gene Group	Erlotinib core gene group
FOS	2.26325	NA	NA	NA	2.33237	NA	NA	NA	NA	NA	-3.49465	NA	NA	NA	NA	1.90333
FOSL1	-3.35548	NA	-1.35315	2.32709	NA	2.1524	3.5053	3.67746	3.56469	1.83709	3.75824	NA	-1.85626	2.01534	NA	NA
FOXC1	1.13327	NA	NA	NA	NA	NA	-1.12382	-1.17662	-1.08862	NA	-1.06805	NA	NA	NA	NA	NA		Cetuximab core Gene Group	Erlotinib core gene group
FOXL1	-1.83462	NA	NA	1.577	NA	1.54664	1.69786	1.72494	1.85548	1.26872	1.94798	NA	NA	1.30001	NA	NA
FOXN1	4.88811	NA	NA	NA	NA	NA	-4.40908	NA	NA	NA	NA	NA	NA	NA	NA	NA		Cetuximab core Gene Group
FOXO1	1.103	NA	NA	NA	NA	NA	-1.15476	-1.533	-1.11925	NA	NA	NA	1.29081	NA	NA	NA		Cetuximab core Gene Group	Erlotinib core gene group
FOXO6	2.39031	NA	NA	NA	NA	NA	-2.47503	NA	NA	NA	NA	NA	NA	NA	NA	NA		Cetuximab core Gene Group
FOXQ1	3.38001	NA	1.6211	-2.83801	NA	NA	-2.71785	-2.87821	-2.23923	NA	-3.03067	NA	2.42846	-2.1698	1.72325	NA		Cetuximab core Gene Group	Erlotinib core gene group
FRK	1.78481	NA	NA	-1.33357	NA	-1.00102	-1.49712	-1.63296	-1.44582	-1.04755	-1.5023	NA	NA	-1.37551	NA	NA
FSCN1	-1.67794	NA	NA	NA	NA	1.02901	1.74943	1.99843	1.86398	1.07538	1.72735	NA	NA	NA	NA	NA
FSIP2	2.18405	NA	1.5089	NA	NA	NA	-1.99636	-1.56945	-2.486	NA	-1.85723	NA	NA	NA	NA	NA		Cetuximab core Gene Group	Erlotinib core gene group
FTH1	1.23737	NA	NA	NA	NA	NA	NA	NA	NA	NA	-1.51076	NA	NA	NA	NA	NA
FTH1P8	1.26349	NA	NA	NA	NA	NA	NA	NA	NA	NA	-1.5545	NA	NA	NA	NA	NA
FXYD3	2.43729	NA	1.00317	-1.83589	NA	-1.31252	-2.2971	-2.48072	-1.89609	NA	-1.63285	NA	1.62824	-1.37028	NA	NA			Erlotinib core gene group
FXYD5	-1.13512	NA	NA	NA	NA	NA	NA	NA	NA	NA	1.60108	NA	NA	NA	NA	NA
FYB1	3.27379	NA	1.27854	-2.64139	NA	NA	-2.18181	-2.41035	-2.00558	NA	-3.02254	NA	2.1892	-1.94588	1.73158	NA		Cetuximab core Gene Group	Erlotinib core gene group
FZD10-AS1	1.33556	NA	1.16993	NA	NA	NA	-1.76667	-1.77335	-1.759	NA	-1.50662	NA	1.39671	NA	NA	NA		Cetuximab core Gene Group	Erlotinib core gene group
GABARAPL1	1.46856	NA	NA	NA	NA	-1.08505	-1.73072	-2.1306	-1.95619	-1.34091	NA	NA	NA	-1.16288	NA	NA
GABRE	1.14747	NA	NA	-1.4015	NA	NA	-1.62086	NA	-1.37717	NA	NA	NA	NA	NA	NA	NA		Cetuximab core Gene Group
GAL3ST4	2.60244	NA	NA	NA	NA	NA	-2.49594	-2.21964	-2.25501	NA	-3.53209	NA	NA	NA	NA	NA		Cetuximab core Gene Group	Erlotinib core gene group
GALNS	1.32625	NA	NA	NA	NA	NA	-1.05255	-1.01306	-1.13314	NA	NA	NA	NA	NA	NA	NA		Cetuximab core Gene Group	Erlotinib core gene group
GALNT13	3.52413	NA	NA	NA	NA	NA	-2.76804	-3.14333	-2.56721	NA	NA	NA	NA	NA	NA	NA		Cetuximab core Gene Group	Erlotinib core gene group
GALNT18	-1.22401	NA	-1.03396	NA	NA	NA	1.1818	NA	NA	NA	NA	NA	NA	NA	NA	NA		Cetuximab core Gene Group
GARS	-1.45641	NA	NA	1.1198	NA	NA	1.4324	1.31361	1.42079	NA	1.16199	NA	NA	NA	NA	NA		Cetuximab core Gene Group	Erlotinib core gene group
GATS	3.20144	NA	1.32083	-1.46041	NA	-1.39824	-2.69645	-2.4189	-2.24272	-1.06104	-2.29556	NA	1.353	-1.11699	NA	NA
GBP6	1.74437	NA	NA	-1.12158	NA	NA	-1.24743	-1.32399	NA	NA	-1.56287	NA	NA	-1.2061	NA	NA		Cetuximab core Gene Group	Erlotinib core gene group
GGT6	3.28638	NA	NA	-2.46165	NA	-2.15991	-3.37356	-2.52137	-2.68489	-1.88023	NA	NA	NA	-2.17191	NA	NA
GJB3	-1.87456	NA	NA	1.02419	NA	1.11689	1.62948	1.88397	1.8093	1.10633	2.3281	NA	NA	1.01355	NA	NA
GJB4	-3.10003	NA	NA	NA	NA	NA	NA	2.73012	NA	NA	4.22851	NA	NA	NA	NA	NA			Erlotinib core gene group
GJB5	-1.48238	NA	NA	NA	NA	NA	NA	1.55994	1.56553	NA	2.54678	NA	NA	NA	NA	NA			Erlotinib core gene group
GK	-1.27379	NA	NA	NA	NA	NA	NA	NA	NA	NA	NA	NA	NA	NA	NA	NA
GLB1L2	-1.02374	NA	NA	NA	NA	NA	NA	1.14527	NA	NA	NA	NA	NA	NA	NA	NA			Erlotinib core gene group
GLCCI1	1.28701	NA	NA	NA	NA	NA	-1.00077	-1.20868	-1.02599	NA	NA	NA	NA	NA	NA	NA		Cetuximab core Gene Group	Erlotinib core gene group
GLIS2	-1.0413	NA	NA	NA	NA	NA	1.12344	1.3015	NA	NA	NA	NA	NA	NA	NA	NA		Cetuximab core Gene Group	Erlotinib core gene group
GLRX	1.25749	NA	NA	-1.53384	NA	NA	-1.37633	-1.44012	-1.08369	NA	NA	NA	NA	-1.3968	NA	NA		Cetuximab core Gene Group	Erlotinib core gene group
GNA15	-1.22647	NA	NA	NA	NA	NA	NA	1.17049	NA	NA	1.71886	NA	NA	NA	NA	NA			Erlotinib core gene group
GNAO1	6.97124	NA	NA	NA	NA	NA	-7.02054	-7.00067	-6.77436	-4.7171	-9.22836	NA	2.38103	-5.42936	NA	NA		Cetuximab core Gene Group
GNB1L	-1.16767	NA	NA	NA	NA	NA	1.32059	1.38476	NA	NA	NA	NA	NA	NA	NA	NA		Cetuximab core Gene Group	Erlotinib core gene group
GNG2	1.27323	NA	NA	-1.36497	NA	NA	NA	-1.22789	-1.12021	NA	-2.13757	NA	NA	-1.48945	1.131	NA			Erlotinib core gene group
GOLGA7B	-2.26883	NA	NA	NA	NA	NA	NA	2.0515	NA	NA	NA	NA	-2.00169	NA	NA	NA			Erlotinib core gene group
GPAT3	-2.1647	NA	NA	1.38231	NA	1.65475	2.39763	3.2504	3.45772	1.8241	3.59244	NA	NA	1.55378	NA	NA
GPC1	1.11782	NA	NA	NA	NA	NA	NA	-1.10411	NA	NA	-1.53287	NA	NA	-1.01007	NA	NA			Erlotinib core gene group
GPM6A	2.80893	NA	NA	NA	NA	NA	-2.62183	-2.78831	-2.70436	NA	NA	NA	NA	NA	NA	NA		Cetuximab core Gene Group	Erlotinib core gene group
GPNMB	2.84431	NA	NA	-1.37246	NA	NA	-1.71113	-2.23158	NA	NA	-2.52461	NA	1.85813	-1.35057	NA	NA		Cetuximab core Gene Group	Erlotinib core gene group
GPR153	-3.25056	NA	NA	2.43069	NA	2.73777	3.28102	3.77112	4.10197	3.10203	5.15518	NA	NA	2.78463	NA	NA
GPR176	-1.26011	NA	NA	NA	NA	NA	NA	NA	NA	NA	NA	NA	NA	NA	NA	NA
GPR37L1	2.79306	NA	NA	-4.19172	NA	NA	-2.62529	NA	NA	NA	NA	NA	NA	NA	NA	NA		Cetuximab core Gene Group
GPT2	-1.16722	NA	NA	NA	NA	NA	NA	1.35355	NA	NA	NA	NA	NA	NA	NA	NA			Erlotinib core gene group
GPX2	1.20568	NA	NA	NA	NA	NA	NA	NA	NA	NA	NA	NA	NA	NA	NA	NA
GRAMD2A	2.21655	NA	NA	NA	NA	NA	-1.73055	-1.91875	-1.55383	NA	-2.27154	NA	1.23866	NA	NA	NA		Cetuximab core Gene Group	Erlotinib core gene group
GRB7	-2.31987	NA	NA	1.4206	NA	1.04762	1.50045	1.67423	NA	NA	2.18772	NA	NA	1.34606	NA	NA			Erlotinib core gene group
GREB1	2.36961	NA	NA	NA	NA	NA	NA	NA	NA	NA	NA	NA	NA	NA	NA	NA
GRIP1	1.33385	NA	NA	NA	NA	NA	NA	NA	NA	NA	NA	NA	NA	NA	NA	NA
GSN	1.38908	NA	NA	NA	NA	NA	-1.6144	-1.59435	-1.70932	NA	NA	NA	1.04782	NA	NA	NA		Cetuximab core Gene Group	Erlotinib core gene group
GSTA4	2.10617	NA	NA	NA	NA	NA	-1.93984	-2.06247	-2.06095	NA	-2.3599	NA	1.70099	NA	NA	NA		Cetuximab core Gene Group	Erlotinib core gene group
GSTM4	1.17537	NA	NA	NA	NA	NA	-1.10529	-1.13226	-1.04652	NA	-1.52067	NA	NA	NA	NA	NA		Cetuximab core Gene Group	Erlotinib core gene group
H19	5.61262	NA	NA	-3.58789	NA	NA	-4.08436	-2.28048	NA	NA	-3.90562	NA	2.22892	NA	NA	NA		Cetuximab core Gene Group	Erlotinib core gene group
HACD4	1.36628	NA	NA	NA	NA	NA	-1.23338	-1.51175	-1.30131	NA	-1.24061	NA	NA	NA	NA	NA		Cetuximab core Gene Group	Erlotinib core gene group
HBEGF	-4.68571	NA	NA	3.92712	NA	NA	NA	NA	4.34812	NA	5.99783	NA	-1.47107	3.43461	NA	NA
HBP1	1.15133	NA	NA	NA	NA	NA	-1.25068	-1.65166	-1.35373	NA	NA	NA	NA	NA	NA	NA		Cetuximab core Gene Group	Erlotinib core gene group
HCFC1R1	2.14726	NA	NA	-1.72742	NA	-2.08953	-2.94237	-3.15859	-2.96248	NA	-2.86628	NA	1.96998	NA	NA	NA			Erlotinib core gene group
HDAC11	1.04842	NA	NA	NA	NA	NA	-1.13987	NA	-1.04245	NA	NA	NA	NA	NA	NA	NA		Cetuximab core Gene Group
HDAC9	-2.19808	NA	NA	1.51023	NA	NA	1.4946	1.77116	1.05413	NA	2.69586	NA	-1.63115	NA	NA	-1.64703		Cetuximab core Gene Group	Erlotinib core gene group
HECW1	1.39707	NA	NA	NA	NA	NA	-1.08094	-1.11226	-1.3239	NA	-2.3481	NA	NA	-1.22249	NA	NA		Cetuximab core Gene Group	Erlotinib core gene group
HEG1	2.59725	NA	NA	-2.50366	NA	-2.03865	-2.46891	-2.51176	-2.48775	-1.70322	-3.44251	NA	NA	-2.16462	NA	NA
HES2	3.07438	NA	2.13317	NA	NA	NA	-3.31834	-4.45232	-3.42979	NA	NA	NA	3.5379	NA	NA	NA		Cetuximab core Gene Group	Erlotinib core gene group
HID1	1.39088	NA	NA	NA	NA	NA	-1.99201	-1.88433	-1.99229	NA	NA	NA	NA	NA	NA	NA		Cetuximab core Gene Group	Erlotinib core gene group
HK2	-1.18259	NA	NA	NA	NA	NA	1.00248	1.01786	1.38588	NA	1.75226	NA	NA	NA	NA	NA		Cetuximab core Gene Group	Erlotinib core gene group
HLA-DMA	1.85749	NA	NA	NA	NA	NA	-1.78031	NA	NA	NA	NA	NA	NA	NA	NA	NA		Cetuximab core Gene Group
HMCN1	2.14165	NA	NA	NA	NA	NA	-2.00008	NA	NA	NA	-2.4643	NA	NA	NA	NA	NA		Cetuximab core Gene Group
HMGA1	-2.30077	NA	-1.00198	1.37767	NA	1.17483	2.17312	2.40382	2.081	1.07406	1.87667	NA	-1.34406	1.27907	NA	NA
HMGA2	-1.64207	NA	NA	1.16298	NA	1.03682	1.62717	2.62437	2.33871	1.77418	3.23749	NA	NA	1.90319	NA	NA
HOXA5	1.38611	NA	NA	-1.09833	NA	NA	-1.31255	-1.38253	-1.62106	NA	-2.00221	NA	NA	-1.22409	NA	NA		Cetuximab core Gene Group	Erlotinib core gene group
HOXB3	1.30595	NA	NA	-1.4252	NA	NA	-1.48983	NA	-1.51365	NA	-1.37192	NA	NA	NA	NA	NA		Cetuximab core Gene Group
HPCAL1	-1.58114	NA	NA	1.96818	NA	2.0145	1.87451	2.45332	2.22313	2.26969	2.10899	NA	NA	2.21761	NA	NA
HR	1.19056	NA	NA	NA	1.30178	NA	NA	NA	NA	NA	NA	NA	NA	NA	1.18715	NA
HS1BP3-IT1	-2.39488	NA	NA	NA	NA	1.64044	2.3322	4.30362	1.96032	1.99706	2.37953	NA	NA	1.46508	NA	NA
HS6ST1	1.67145	NA	NA	-1.60559	NA	-1.51757	-1.81936	-1.85653	-1.52401	NA	-1.76746	NA	NA	-1.02292	NA	NA			Erlotinib core gene group
HSD11B2	-1.49435	NA	NA	NA	NA	NA	1.35843	1.55833	NA	NA	NA	NA	NA	NA	NA	NA		Cetuximab core Gene Group	Erlotinib core gene group
HSPA12A	1.45395	NA	NA	NA	NA	NA	NA	NA	NA	NA	-1.42628	NA	NA	NA	NA	NA
HSPB8	2.77008	NA	NA	-2.36721	NA	NA	-2.09955	NA	NA	NA	NA	NA	NA	NA	NA	NA		Cetuximab core Gene Group
HSPBP1	-1.06393	NA	NA	NA	NA	NA	1.02312	NA	1.04314	NA	NA	NA	NA	NA	NA	NA		Cetuximab core Gene Group
HYAL1	1.03866	NA	NA	NA	NA	NA	-1.24417	-1.04777	-1.30098	NA	NA	NA	NA	NA	NA	NA		Cetuximab core Gene Group	Erlotinib core gene group
ID1	1.71499	NA	NA	-2.15571	NA	-1.53597	-2.00232	-2.21278	-2.28413	-1.1836	-2.63118	NA	1.01887	-1.79864	NA	NA
ID2	3.86083	NA	2.42079	NA	NA	NA	-3.45881	-3.7934	-2.87972	NA	-3.2842	NA	2.81011	NA	NA	NA		Cetuximab core Gene Group	Erlotinib core gene group
IDH1	2.04863	NA	NA	-1.59781	NA	-1.4517	-2.06913	-1.95055	-1.72503	-1.28896	-2.26279	NA	NA	-1.43332	NA	NA
IDNK	1.1544	NA	NA	NA	NA	NA	NA	NA	NA	NA	NA	NA	NA	NA	NA	NA
IER3	-2.15328	NA	NA	1.76077	NA	1.67263	1.95711	2.41494	2.04598	1.46176	2.67976	NA	NA	1.55271	NA	NA
IER5	-1.49869	NA	NA	NA	NA	NA	NA	NA	1.07026	NA	2.07212	NA	NA	NA	NA	NA
IFI44	1.13691	NA	NA	-2.03509	NA	-1.12602	-1.04512	NA	-1.18085	NA	NA	NA	NA	NA	NA	NA
IFIT1	1.74049	NA	NA	-3.80037	NA	-2.64413	-1.90532	-1.49637	-1.80631	NA	NA	NA	1.03773	-1.57913	1.14264	-1.9801			Erlotinib core gene group
IFIT2	1.93402	NA	NA	-2.48725	NA	-1.79208	-2.08114	-1.6489	-2.05289	NA	NA	NA	NA	-1.23453	NA	NA			Erlotinib core gene group
IFRD2	-1.1876	NA	NA	NA	NA	NA	1.15944	1.48614	1.42664	NA	1.12289	NA	NA	NA	NA	NA		Cetuximab core Gene Group	Erlotinib core gene group
IFT140	1.0231	NA	NA	NA	NA	NA	NA	NA	-1.01159	NA	-1.38617	NA	NA	NA	NA	NA
IGF2BP2-AS1	-4.4737	NA	NA	3.51923	NA	NA	NA	2.51058	NA	NA	NA	NA	NA	2.94954	NA	NA			Erlotinib core gene group
IGFBP3	3.39521	NA	NA	NA	NA	-4.70207	-4.48804	-3.25104	-3.219	-2.3932	NA	NA	NA	-1.77525	NA	NA
IGFBP6	1.83973	NA	NA	-1.67724	NA	-1.27723	-2.07269	NA	-1.62667	NA	NA	NA	NA	NA	NA	NA
IGFL2-AS1	1.9312	NA	1.04966	-1.3384	NA	NA	-1.38355	-1.5216	-1.55445	NA	-1.9721	NA	1.43236	NA	NA	NA		Cetuximab core Gene Group	Erlotinib core gene group
IKZF2	2.45192	NA	1.38394	-1.849	NA	-1.58739	-2.95792	-2.58071	-2.61354	-1.33675	NA	NA	1.23223	-1.58914	NA	NA
IL17RE	1.69075	NA	NA	-2.18196	NA	-2.05875	-2.88004	-2.33434	-2.55755	NA	-2.74006	NA	NA	NA	NA	NA			Erlotinib core gene group
IL1A	-3.28482	NA	NA	1.94316	NA	NA	1.66688	1.21355	NA	NA	3.36509	NA	NA	1.40665	NA	NA		Cetuximab core Gene Group	Erlotinib core gene group
IL23A	-3.66641	NA	NA	2.3342	NA	NA	2.42223	1.89194	NA	NA	NA	NA	NA	1.66796	NA	NA		Cetuximab core Gene Group	Erlotinib core gene group
IMPA2	1.26582	NA	NA	NA	NA	NA	NA	-1.02824	NA	NA	-1.93442	NA	NA	NA	NA	1.12331			Erlotinib core gene group
IP6K3	5.79227	NA	NA	-7.942	NA	-5.10558	-5.6983	-5.2825	-5.70879	-3.71611	-6.36217	NA	NA	-6.49084	NA	NA
IQSEC2	1.42539	NA	NA	NA	NA	NA	-1.69577	-1.61938	-1.58942	NA	-1.34712	NA	NA	NA	NA	NA		Cetuximab core Gene Group	Erlotinib core gene group
ITFG1	1.03255	NA	NA	NA	NA	NA	NA	NA	NA	NA	NA	NA	NA	NA	NA	NA
ITGA5	-1.44213	NA	NA	NA	NA	NA	NA	1.16319	NA	NA	2.0187	NA	NA	NA	NA	NA			Erlotinib core gene group
ITGA9-AS1	1.47825	NA	NA	NA	NA	NA	-1.10849	NA	NA	NA	NA	NA	NA	NA	NA	NA		Cetuximab core Gene Group
ITGB5	-1.5222	NA	NA	1.0631	NA	NA	1.65803	1.86843	1.60301	NA	1.31264	NA	-1.01703	NA	NA	NA		Cetuximab core Gene Group	Erlotinib core gene group
ITGB8	1.55299	NA	NA	NA	NA	NA	NA	-1.49875	NA	NA	NA	NA	NA	NA	NA	NA			Erlotinib core gene group
ITM2B	1.2272	NA	NA	NA	NA	NA	-1.10363	-1.3471	NA	NA	-1.03757	NA	NA	NA	NA	NA		Cetuximab core Gene Group	Erlotinib core gene group
ITPR3	-1.02736	NA	NA	NA	NA	NA	NA	1.16166	NA	NA	1.2619	NA	NA	NA	NA	NA			Erlotinib core gene group
JMJD1C-AS1	2.01728	NA	NA	NA	NA	NA	-1.80211	-1.73673	-1.8739	NA	-3.06847	NA	NA	NA	NA	NA		Cetuximab core Gene Group	Erlotinib core gene group
KAT2B	1.10105	NA	NA	NA	NA	NA	-1.111	-1.15246	NA	NA	NA	NA	NA	NA	NA	NA		Cetuximab core Gene Group	Erlotinib core gene group
KCNJ15	1.15541	NA	NA	NA	NA	NA	NA	NA	NA	NA	NA	NA	NA	NA	NA	NA
KCNJ5	1.95805	NA	NA	NA	NA	NA	-1.93629	-1.53392	-1.81797	NA	-2.16037	NA	NA	NA	NA	NA		Cetuximab core Gene Group	Erlotinib core gene group
KCP	1.76759	NA	1.2744	NA	NA	NA	-1.87842	-1.79759	-1.95869	NA	-1.59679	NA	NA	NA	NA	NA		Cetuximab core Gene Group	Erlotinib core gene group
KCTD15	-1.2404	NA	NA	NA	NA	NA	1.41176	1.78174	1.84203	NA	1.52274	NA	NA	1.00045	NA	NA		Cetuximab core Gene Group	Erlotinib core gene group
KDELC2	1.04523	NA	NA	NA	NA	NA	NA	NA	NA	NA	NA	NA	NA	NA	NA	NA
KDM1A	1.02151	NA	NA	NA	NA	NA	NA	NA	NA	NA	NA	NA	NA	NA	NA	NA
KIAA0513	1.21199	NA	NA	NA	NA	NA	-1.23278	-1.15881	NA	NA	-1.0241	NA	1.01489	NA	NA	NA		Cetuximab core Gene Group	Erlotinib core gene group
KIAA1211L	3.73505	NA	NA	NA	NA	NA	-2.11867	-2.38873	NA	NA	-5.49072	NA	NA	NA	NA	NA		Cetuximab core Gene Group	Erlotinib core gene group
KIAA1217	1.11539	NA	NA	NA	NA	NA	-1.17861	NA	NA	NA	NA	NA	NA	NA	NA	NA		Cetuximab core Gene Group
KIAA1683	2.62272	NA	2.11024	NA	NA	NA	-3.52149	-2.99747	-3.40314	NA	-2.86947	NA	NA	NA	NA	NA		Cetuximab core Gene Group	Erlotinib core gene group
KIAA1841	1.24742	NA	NA	NA	NA	NA	-1.04243	-1.05374	NA	NA	-1.02433	NA	NA	NA	NA	NA		Cetuximab core Gene Group	Erlotinib core gene group
KIF21B	-2.29937	NA	NA	NA	NA	NA	NA	NA	NA	NA	NA	NA	NA	NA	NA	NA
KIFC3	-2.02254	NA	NA	NA	NA	NA	1.62729	2.44243	1.6619	1.5056	2.42123	NA	NA	1.60325	NA	NA		Cetuximab core Gene Group
KLHL24	1.62703	NA	1.43171	NA	NA	NA	-1.6483	-2.34201	-1.85507	-1.09783	NA	NA	1.23152	NA	NA	NA		Cetuximab core Gene Group
KLHL29	1.23929	NA	NA	NA	NA	NA	-1.27276	-1.41419	-1.20127	NA	-1.13796	NA	NA	NA	NA	NA		Cetuximab core Gene Group	Erlotinib core gene group
KLHL3	1.29583	NA	NA	NA	NA	NA	-1.30306	-1.14745	-1.48752	NA	-1.2011	NA	NA	NA	NA	NA		Cetuximab core Gene Group	Erlotinib core gene group
KLK10	2.02682	NA	NA	-3.15974	NA	NA	-2.32734	-1.67057	-1.66794	NA	NA	NA	1.15885	-2.14001	NA	NA		Cetuximab core Gene Group	Erlotinib core gene group
KMT2E	1.0209	NA	NA	NA	NA	NA	NA	NA	NA	NA	NA	NA	NA	NA	NA	NA
KRCC1	1.29948	NA	NA	NA	NA	NA	NA	-1.21638	NA	NA	NA	NA	NA	NA	NA	NA			Erlotinib core gene group
KRT13	4.08714	NA	NA	-4.35959	NA	-3.03675	-4.34452	-4.5253	-4.12466	-2.44807	-3.13308	NA	2.07334	-3.77194	NA	NA
KRT15	4.6681	NA	NA	-3.51792	NA	NA	-4.6397	-4.46616	-3.8976	-1.57611	NA	NA	2.88662	-2.76596	1.19228	NA		Cetuximab core Gene Group
KRT18	-2.4113	NA	-1.01485	NA	NA	NA	1.51259	2.14373	1.83834	NA	2.7831	NA	-1.36672	1.08624	NA	NA		Cetuximab core Gene Group	Erlotinib core gene group
KRT19	3.4504	NA	NA	-3.5888	NA	-2.0809	-3.58949	-3.01653	-2.88206	NA	NA	NA	2.02358	-2.5038	NA	NA			Erlotinib core gene group
KRT5	2.73884	NA	NA	-2.21331	NA	-1.74213	-2.27528	-1.80234	-1.32582	-1.26026	-1.95282	NA	NA	-1.7291	NA	NA
KRT8	-1.85924	NA	NA	NA	NA	NA	NA	1.06079	NA	NA	2.10227	NA	NA	NA	NA	-1.42609			Erlotinib core gene group
KRT80	-1.42739	NA	-1.39408	NA	NA	NA	NA	1.91795	NA	NA	1.18093	NA	-2.05522	NA	NA	NA			Erlotinib core gene group
KRT81	-1.48324	NA	-1.05181	NA	NA	NA	1.06002	1.24728	NA	NA	1.21265	NA	-1.32789	NA	NA	NA		Cetuximab core Gene Group	Erlotinib core gene group
KRT83	-1.67397	NA	NA	NA	NA	NA	NA	NA	NA	NA	NA	NA	NA	NA	NA	NA
KRT8P36	-1.55552	NA	NA	NA	NA	NA	NA	NA	NA	NA	NA	NA	NA	NA	NA	NA
LAMA5	2.92449	NA	NA	-3.52774	NA	-2.95906	-3.50993	-3.2437	-3.17328	-1.98472	NA	NA	1.2516	-2.55011	NA	NA
LAMB2	1.21972	NA	NA	-1.1694	NA	-1.0261	-1.50508	-1.47597	-1.54106	NA	-1.1105	NA	NA	NA	NA	NA			Erlotinib core gene group
LAMC2	-3.48659	NA	NA	1.48045	NA	NA	1.91486	1.81733	1.76588	NA	4.40679	NA	NA	1.28728	NA	NA		Cetuximab core Gene Group	Erlotinib core gene group
LAPTM5	-1.53494	NA	NA	NA	NA	NA	2.25135	5.44858	3.46564	3.65182	3.194	NA	NA	3.52431	NA	NA		Cetuximab core Gene Group
LAT2	-3.7603	NA	NA	NA	NA	NA	NA	2.24512	NA	NA	NA	NA	NA	2.4108	NA	NA			Erlotinib core gene group
LCAT	-1.87025	NA	NA	NA	NA	NA	NA	1.80375	NA	NA	1.93594	NA	NA	NA	NA	NA			Erlotinib core gene group
LETM2	-1.34357	NA	NA	1.4757	NA	1.3187	1.17672	1.77669	1.49585	NA	1.30549	NA	NA	1.08156	NA	NA			Erlotinib core gene group
LHX6	2.07289	NA	1.13952	-1.18658	NA	NA	-1.56102	-1.74036	-1.34291	NA	-2.31277	NA	1.39833	-1.08976	NA	NA		Cetuximab core Gene Group	Erlotinib core gene group
LIF	-1.70926	NA	NA	1.10327	NA	1.06333	2.006	2.73012	2.0444	1.34929	1.65295	NA	-1.3907	1.39153	NA	NA
LINC00271	1.82817	NA	NA	NA	NA	NA	-2.22212	-1.87313	-2.21688	NA	-2.41869	NA	NA	NA	NA	NA		Cetuximab core Gene Group	Erlotinib core gene group
LINC00342	1.38925	NA	NA	NA	NA	NA	-1.16012	NA	-1.27061	NA	NA	NA	NA	NA	NA	NA		Cetuximab core Gene Group
LINC00511	1.64877	NA	NA	NA	NA	NA	-1.46669	-1.28284	-1.3458	NA	-1.38871	NA	NA	NA	NA	NA		Cetuximab core Gene Group	Erlotinib core gene group
LINC00649	1.43689	NA	NA	NA	NA	NA	-1.51338	-1.51102	-1.54988	NA	NA	NA	NA	NA	NA	NA		Cetuximab core Gene Group	Erlotinib core gene group
LINC00704	-3.3354	NA	NA	1.46935	NA	2.00021	3.33298	3.48387	3.35676	2.30339	4.16281	NA	NA	1.79913	NA	NA
LINC00863	1.44707	NA	NA	NA	NA	NA	-1.17332	-1.49432	-1.45943	NA	-1.9489	NA	NA	-1.09508	NA	NA		Cetuximab core Gene Group	Erlotinib core gene group
LINC00941	-2.68406	NA	NA	2.04862	NA	1.72691	3.04225	3.41991	3.1754	2.14368	2.95924	NA	-1.29446	2.46493	NA	NA
LINC00958	-1.06113	NA	NA	NA	NA	NA	NA	NA	NA	NA	1.39144	NA	NA	NA	NA	NA
LINC00964	4.27529	NA	NA	-3.02011	NA	-2.53939	-3.60342	-3.69133	-3.80916	-2.66465	-2.77734	NA	NA	-3.13683	NA	NA
LINC01004	1.31879	NA	1.46586	NA	NA	NA	-1.28979	NA	NA	NA	NA	NA	NA	NA	NA	NA		Cetuximab core Gene Group
LINC01021	1.30799	NA	NA	NA	NA	NA	-1.20522	NA	NA	NA	NA	NA	NA	NA	NA	NA		Cetuximab core Gene Group
LINC01204	-2.34825	NA	NA	1.14467	NA	NA	NA	1.48373	NA	NA	2.55876	NA	NA	1.63925	NA	NA			Erlotinib core gene group
LINC01225	1.58809	NA	NA	-1.90035	NA	NA	-2.07653	-1.75763	-2.50372	NA	NA	NA	NA	NA	NA	NA		Cetuximab core Gene Group	Erlotinib core gene group
LINC01226	1.57955	NA	NA	-1.78869	NA	NA	-1.73079	-1.40378	-1.91504	NA	-1.1656	NA	NA	NA	NA	NA		Cetuximab core Gene Group	Erlotinib core gene group
LINC01232	1.01741	NA	NA	NA	NA	NA	-1.40969	-1.25794	-1.37654	NA	-1.17904	NA	NA	NA	NA	NA		Cetuximab core Gene Group	Erlotinib core gene group
LINC01271	2.23917	NA	NA	NA	NA	NA	-1.9544	NA	NA	NA	NA	NA	NA	NA	NA	NA		Cetuximab core Gene Group
LINC01605	-1.9255	NA	NA	NA	NA	1.11637	2.60126	2.38025	1.85101	1.30393	NA	NA	NA	1.00255	NA	NA
LINC01655	2.66377	NA	NA	NA	NA	NA	-1.80349	-2.32365	-2.55175	NA	-2.03588	NA	NA	NA	NA	NA		Cetuximab core Gene Group	Erlotinib core gene group
LINC01679	2.83897	NA	2.11773	NA	NA	NA	-2.72493	-3.05057	-2.63727	NA	NA	NA	2.38036	NA	NA	NA		Cetuximab core Gene Group	Erlotinib core gene group
LINC01876	1.4226	NA	NA	NA	NA	NA	NA	NA	NA	NA	NA	NA	NA	NA	NA	NA
LINC02028	2.78987	NA	NA	-2.92501	NA	-2.64822	-3.48395	-3.34359	-4.15593	-3.08045	-4.30504	NA	NA	-3.35228	NA	NA
LINC02043	-1.94437	NA	NA	NA	NA	NA	1.785	1.9301	1.57961	NA	NA	NA	NA	NA	NA	NA		Cetuximab core Gene Group	Erlotinib core gene group
LINC02257	2.0682	NA	NA	NA	NA	NA	-1.62731	-1.6057	-1.86813	NA	-2.06712	NA	NA	NA	NA	NA		Cetuximab core Gene Group	Erlotinib core gene group
LINC02518	7.18319	NA	NA	-5.58791	NA	-4.99424	-7.43087	-7.48976	-6.95594	NA	-7.5565	NA	3.75636	NA	NA	NA			Erlotinib core gene group
LINC02535	-5.73842	NA	NA	3.09718	NA	NA	4.52733	4.96516	3.46911	NA	4.66986	NA	NA	2.73616	NA	NA		Cetuximab core Gene Group	Erlotinib core gene group
LINC02541	2.56579	NA	NA	-2.72582	NA	-1.8285	-2.46846	-2.70379	-2.42755	-1.33442	-3.53336	NA	1.36567	-2.23808	NA	NA
LONP1	-1.26482	NA	NA	NA	NA	NA	1.13461	1.40708	1.03228	NA	NA	NA	NA	NA	NA	NA		Cetuximab core Gene Group	Erlotinib core gene group
LONRF3	-1.62109	NA	NA	1.00231	NA	NA	1.50988	2.14474	1.7821	1.14571	1.8861	NA	NA	1.42085	NA	NA		Cetuximab core Gene Group
LPP-AS2	1.34124	NA	NA	NA	NA	NA	NA	NA	-1.05807	NA	-1.49339	NA	NA	NA	NA	NA
LRP1	1.93651	NA	NA	-1.78786	NA	NA	-1.87365	-1.52831	-1.76916	NA	-1.8593	NA	1.23451	-1.07531	NA	NA		Cetuximab core Gene Group	Erlotinib core gene group
LRP11	1.25361	NA	NA	NA	NA	NA	NA	-1.38805	NA	NA	-1.13136	NA	NA	NA	NA	NA			Erlotinib core gene group
LRRC37A3	1.39835	NA	NA	NA	NA	NA	NA	NA	-1.22124	NA	NA	NA	NA	NA	NA	NA
LRRC59	-1.15167	NA	NA	NA	NA	NA	1.06284	1.20965	1.21923	NA	1.03715	NA	NA	NA	NA	NA		Cetuximab core Gene Group	Erlotinib core gene group
LRRC8C	-1.52371	NA	NA	1.30053	NA	1.20549	1.3557	NA	1.09038	NA	1.80186	NA	NA	NA	NA	NA
LSP1	3.03844	NA	NA	-4.08974	NA	NA	-3.49429	NA	NA	NA	NA	NA	NA	NA	NA	NA		Cetuximab core Gene Group
LTBP2	-1.67422	NA	-1.1232	NA	NA	NA	1.57844	2.40851	1.77365	1.78673	2.20496	NA	NA	1.36265	NA	NA		Cetuximab core Gene Group
LTBP3	-1.57417	NA	NA	NA	NA	NA	NA	3.31116	NA	2.7405	NA	NA	NA	2.39703	NA	NA
LUM	1.99422	NA	NA	-3.12264	NA	-3.06791	-2.84145	-2.32862	-2.35519	-1.93889	NA	NA	NA	-1.97678	NA	NA
LY6D	4.29601	NA	NA	-3.46386	NA	-2.7876	-4.56679	-4.40189	-3.28447	NA	-3.45138	NA	3.22657	-1.85486	NA	NA			Erlotinib core gene group
LY6K	-1.18433	NA	NA	NA	NA	NA	NA	1.06061	1.08052	NA	1.65313	NA	NA	1.05174	NA	NA			Erlotinib core gene group
LYAR	-1.19435	NA	NA	NA	NA	NA	1.32553	1.90365	1.58897	NA	1.50993	NA	-1.2762	NA	NA	NA		Cetuximab core Gene Group	Erlotinib core gene group
LYPD1	3.69401	NA	1.45171	-3.55893	NA	-2.52742	-3.96907	-3.44992	-3.77377	-2.06476	-4.0591	NA	NA	-3.116	NA	NA
LYPD3	1.57191	NA	NA	NA	NA	NA	-1.54981	-1.3122	-1.26812	NA	-1.89608	NA	NA	-1.00301	NA	NA		Cetuximab core Gene Group	Erlotinib core gene group
LYPD6B	1.11872	NA	NA	NA	NA	NA	NA	NA	NA	NA	NA	NA	NA	NA	NA	NA
MAF	5.89812	NA	NA	-3.25244	NA	NA	-4.81446	-5.3462	-4.66492	NA	NA	NA	3.51573	-2.60362	NA	NA		Cetuximab core Gene Group	Erlotinib core gene group
MAFF	-2.7833	NA	NA	2.32455	NA	1.65931	2.04739	2.3211	2.00224	1.28914	3.47057	NA	NA	1.95648	NA	NA
MAFK	-1.28059	NA	NA	NA	NA	NA	NA	1.32535	NA	NA	1.41265	NA	NA	1.14027	NA	NA			Erlotinib core gene group
MALAT1	1.1783	NA	NA	NA	NA	NA	-1.28701	NA	-1.52416	NA	NA	NA	NA	NA	NA	NA		Cetuximab core Gene Group
MAMDC4	-1.38965	NA	NA	NA	NA	NA	NA	1.71993	NA	NA	1.76882	NA	NA	NA	NA	NA			Erlotinib core gene group
MAOB	4.14307	NA	2.02254	-2.25427	NA	NA	-2.01469	-2.29497	-1.80224	NA	-4.81558	NA	1.86243	-2.70991	2.28195	3.00172		Cetuximab core Gene Group	Erlotinib core gene group
MAP2	1.75943	NA	NA	NA	NA	NA	NA	-1.48157	-1.39129	NA	-2.20287	NA	NA	-1.4824	NA	NA			Erlotinib core gene group
MAP3K1	1.12061	NA	NA	NA	NA	NA	-1.00975	NA	NA	NA	NA	NA	NA	NA	NA	NA		Cetuximab core Gene Group
MAP3K5	1.18347	NA	NA	NA	NA	NA	NA	NA	NA	NA	NA	NA	NA	NA	NA	NA
MAP3K9	-1.11299	NA	NA	NA	NA	NA	1.11436	1.63266	1.30639	1.19541	1.83147	NA	NA	1.20043	NA	NA		Cetuximab core Gene Group
MAP7D2	3.16927	NA	NA	-2.0274	NA	-2.667	-3.84658	-3.60512	-4.13483	-2.28392	-4.40328	NA	NA	NA	NA	NA
MAPT	1.41698	NA	NA	NA	NA	NA	-1.1951	-1.06201	-1.29418	NA	-1.30378	NA	NA	NA	NA	NA		Cetuximab core Gene Group	Erlotinib core gene group
MARCH4	-3.9152	NA	NA	NA	NA	NA	NA	3.13477	NA	NA	NA	NA	NA	2.56393	NA	NA			Erlotinib core gene group
MARCKS	1.21443	NA	NA	NA	NA	NA	NA	-1.22687	NA	NA	-1.72006	NA	NA	-1.08472	NA	NA			Erlotinib core gene group
MARS	-1.40416	NA	NA	NA	NA	NA	1.40539	1.35888	1.34796	NA	NA	NA	NA	NA	NA	NA		Cetuximab core Gene Group	Erlotinib core gene group
MATN2	4.66565	NA	1.61694	-3.14814	NA	-2.38688	-4.00335	-4.0072	-3.50392	-2.31222	-4.37078	NA	1.69754	-3.06293	NA	NA
MB21D2	-1.01479	NA	NA	NA	NA	NA	NA	NA	NA	NA	NA	NA	NA	NA	NA	NA
MBNL1-AS1	1.55428	NA	NA	NA	NA	NA	NA	NA	NA	NA	-1.85547	NA	NA	NA	NA	NA
MDFI	-1.0267	NA	NA	NA	NA	NA	NA	1.29898	1.01481	1.00054	1.22849	NA	NA	NA	NA	NA
MDGA1	2.28026	NA	1.7229	NA	NA	NA	NA	NA	NA	NA	NA	NA	1.4347	-1.13476	1.69494	NA
MDH1B	2.07308	NA	NA	NA	NA	NA	-2.03641	-2.00715	-2.0092	NA	NA	NA	NA	NA	NA	NA		Cetuximab core Gene Group	Erlotinib core gene group
MDK	1.54951	NA	NA	-1.26075	NA	-1.01583	-1.33384	NA	-1.14936	NA	-1.53385	NA	NA	NA	NA	NA
MEF2C	3.86213	NA	2.65667	NA	NA	NA	-3.70814	-3.05943	-3.03989	NA	-3.8359	NA	1.89157	-1.34456	NA	NA		Cetuximab core Gene Group	Erlotinib core gene group
MEGF9	1.04119	NA	NA	NA	NA	NA	NA	-1.02173	NA	NA	NA	NA	NA	NA	NA	NA			Erlotinib core gene group
METTL7A	3.34979	NA	NA	-3.82485	NA	-3.57497	-4.6275	-4.00448	-3.94995	-2.5873	-4.77809	NA	1.40681	-2.83455	NA	NA
MFNG	-1.69643	NA	NA	NA	NA	NA	1.59745	2.48974	1.93944	1.70311	2.1707	NA	NA	1.54087	NA	NA		Cetuximab core Gene Group
MFSD12	-1.48736	NA	NA	NA	NA	NA	NA	NA	NA	NA	1.52176	NA	NA	NA	NA	NA
MFSD2A	-1.3719	NA	NA	NA	NA	NA	1.32593	2.29266	1.85492	NA	1.82599	NA	-1.39804	NA	NA	NA		Cetuximab core Gene Group	Erlotinib core gene group
MICAL2	-2.34501	NA	NA	1.3036	NA	NA	1.92453	2.00728	1.99941	NA	2.72975	NA	-1.07776	1.25309	NA	NA		Cetuximab core Gene Group	Erlotinib core gene group
MICALCL	-2.09859	NA	NA	1.14085	NA	NA	1.46684	1.61058	1.60505	NA	2.81593	NA	NA	1.01742	NA	NA		Cetuximab core Gene Group	Erlotinib core gene group
MIDN	-1.56477	NA	NA	NA	NA	NA	1.33478	1.21613	NA	NA	NA	NA	NA	NA	NA	NA		Cetuximab core Gene Group	Erlotinib core gene group
MIR100HG	-1.71178	NA	NA	1.42392	NA	NA	1.83493	3.37356	2.63205	2.27558	NA	NA	NA	2.82234	NA	NA		Cetuximab core Gene Group
MIR155HG	-2.55655	NA	NA	NA	NA	NA	NA	2.68201	4.0258	NA	NA	NA	NA	1.79619	NA	NA			Erlotinib core gene group
MIR17HG	-1.02985	NA	NA	NA	NA	NA	NA	1.60032	NA	NA	NA	NA	NA	1.42657	NA	NA			Erlotinib core gene group
MIR3936HG	1.02169	NA	NA	NA	NA	NA	-1.15522	NA	NA	NA	NA	NA	NA	NA	NA	NA		Cetuximab core Gene Group
MIR4435-2HG	-1.09426	NA	NA	NA	NA	NA	1.07039	1.773	1.62718	NA	1.92243	NA	NA	NA	NA	NA		Cetuximab core Gene Group	Erlotinib core gene group
MISP	-1.63108	NA	NA	NA	NA	NA	NA	1.87162	NA	NA	NA	NA	-1.80241	NA	NA	NA			Erlotinib core gene group
MLLT3	1.03653	NA	NA	NA	NA	NA	-1.03866	-1.38756	-1.03164	NA	NA	NA	NA	NA	NA	NA		Cetuximab core Gene Group	Erlotinib core gene group
MMP12	4.24532	NA	NA	NA	NA	NA	-3.78518	NA	NA	NA	NA	NA	NA	NA	NA	NA		Cetuximab core Gene Group
MMP28	3.90133	NA	NA	-3.31909	NA	-3.063	-3.88744	-2.9911	-2.57162	-1.94596	-2.84719	NA	1.02318	-2.2235	NA	NA
MOB3B	-1.1858	NA	NA	NA	NA	NA	1.04827	NA	NA	NA	NA	NA	NA	NA	NA	NA		Cetuximab core Gene Group
MON1A	-1.31701	NA	NA	NA	NA	NA	1.24589	1.14655	1.58848	NA	1.56768	NA	NA	NA	NA	NA		Cetuximab core Gene Group	Erlotinib core gene group
MPP3	-1.25231	NA	NA	NA	NA	NA	NA	1.44683	NA	NA	1.1148	NA	NA	NA	NA	NA			Erlotinib core gene group
MPP7	1.59938	NA	1.10171	NA	NA	NA	-1.00011	-1.29217	NA	NA	-1.28268	NA	NA	NA	NA	NA		Cetuximab core Gene Group	Erlotinib core gene group
MRAS	1.53315	NA	NA	NA	NA	NA	-1.5742	-1.50599	-1.5812	NA	NA	NA	NA	NA	NA	NA		Cetuximab core Gene Group	Erlotinib core gene group
MROH2A	3.38646	NA	NA	NA	NA	NA	-2.6559	-2.4538	NA	NA	NA	NA	NA	NA	NA	NA		Cetuximab core Gene Group	Erlotinib core gene group
MROH6	-1.44182	NA	NA	NA	NA	NA	NA	1.32396	NA	NA	NA	NA	NA	NA	NA	NA			Erlotinib core gene group
MROH8	1.97784	NA	NA	NA	NA	NA	-1.80163	-1.35561	NA	NA	NA	NA	NA	NA	NA	NA		Cetuximab core Gene Group	Erlotinib core gene group
MRTO4	-1.15474	NA	NA	NA	NA	NA	1.2762	1.52237	1.60728	NA	1.20193	NA	-1.07247	NA	NA	NA		Cetuximab core Gene Group	Erlotinib core gene group
MSANTD3	-1.13899	NA	NA	NA	NA	NA	NA	NA	1.08711	NA	1.49748	NA	NA	NA	NA	NA
MST1R	-1.05339	NA	NA	NA	NA	NA	NA	NA	NA	NA	1.24477	NA	NA	NA	NA	NA
MT2A	-1.94856	NA	NA	1.47731	NA	1.35714	1.41241	NA	NA	NA	1.29185	NA	NA	NA	NA	NA
MTHFD1L	-1.19941	NA	NA	NA	NA	NA	1.15339	1.34966	1.29377	NA	1.11561	NA	NA	NA	NA	NA		Cetuximab core Gene Group	Erlotinib core gene group
MTHFD2	-1.49691	NA	NA	1.0663	NA	NA	1.52301	1.48713	1.68926	NA	1.24254	NA	-1.25787	NA	NA	NA		Cetuximab core Gene Group	Erlotinib core gene group
MTSS1	3.70722	NA	NA	-1.7836	NA	NA	-2.91739	-3.71278	-3.27114	-2.3574	NA	NA	1.35943	-2.79423	NA	NA		Cetuximab core Gene Group
MUC20	3.92191	NA	NA	-3.30095	NA	-3.17094	-4.58508	-4.67565	-4.77484	-2.88425	NA	NA	1.77984	-3.01197	NA	NA
MUC20P1	4.87795	NA	NA	-3.3958	NA	-3.22831	-4.47365	-4.50875	-4.98986	-2.98004	NA	NA	NA	-3.15378	NA	NA
MXD4	2.69356	NA	NA	-1.40533	NA	NA	-2.91306	-2.75948	-2.44944	NA	NA	NA	1.75019	-1.25996	NA	NA		Cetuximab core Gene Group	Erlotinib core gene group
MYBBP1A	-1.0135	NA	NA	NA	NA	NA	NA	1.40843	1.22857	NA	1.17574	NA	NA	NA	NA	NA			Erlotinib core gene group
MYCL	1.66957	NA	1.65269	NA	NA	NA	-2.87648	-2.83072	-1.95694	NA	NA	NA	1.88451	NA	NA	NA		Cetuximab core Gene Group	Erlotinib core gene group
MYEOV	-3.42185	NA	-1.86199	1.57385	NA	1.51479	3.37864	4.35101	3.4719	2.12818	3.88734	NA	-2.23425	2.19009	NA	NA
MYH16	-4.45869	NA	NA	2.55599	NA	2.92575	4.24617	6.07388	4.90646	4.63779	6.09165	NA	NA	4.259	NA	NA
MYH9	-1.18649	NA	NA	NA	NA	NA	NA	1.10749	NA	NA	NA	NA	NA	NA	NA	NA			Erlotinib core gene group
MYL9	1.27007	NA	NA	-1.38366	NA	-1.53922	-1.34992	-1.01374	-1.07852	NA	NA	NA	NA	NA	NA	NA			Erlotinib core gene group
MYLIP	1.56193	NA	NA	NA	NA	NA	-1.51448	-1.22284	-1.25421	NA	NA	NA	1.19681	NA	NA	NA		Cetuximab core Gene Group	Erlotinib core gene group
MYO3B	3.11134	NA	NA	NA	NA	NA	-3.58447	NA	NA	NA	NA	NA	NA	NA	NA	NA		Cetuximab core Gene Group
N4BP2L1	2.19679	NA	NA	NA	NA	NA	-1.86425	-2.05846	-2.14171	NA	-2.16894	NA	1.15655	NA	NA	NA		Cetuximab core Gene Group	Erlotinib core gene group
NANOS1	2.56723	NA	1.4612	-1.63146	NA	NA	-2.42716	-3.66148	-2.80852	-1.40207	-3.24873	NA	2.26443	-2.04263	NA	NA		Cetuximab core Gene Group
NAPEPLD	1.0756	NA	NA	NA	NA	NA	NA	NA	NA	NA	NA	NA	NA	NA	NA	NA
NAV3	-5.63507	NA	NA	2.93624	NA	2.20735	3.11448	3.82337	2.65673	1.66889	5.92881	NA	-2.1741	2.38069	NA	NA
NCOA2	1.00764	NA	NA	NA	NA	NA	NA	-1.28527	-1.06316	NA	-1.04697	NA	NA	NA	NA	NA			Erlotinib core gene group
NCOA3	1.56905	NA	NA	NA	NA	NA	-1.24954	-1.22395	NA	NA	NA	NA	NA	NA	NA	NA		Cetuximab core Gene Group	Erlotinib core gene group
NDRG4	2.54769	NA	NA	-2.64329	NA	-2.44983	-3.0609	-2.84991	-3.16586	-1.65136	-3.63749	NA	NA	NA	NA	NA
NEB	1.18262	NA	NA	NA	NA	NA	-1.34661	-1.1035	-1.48332	NA	NA	NA	NA	NA	NA	NA		Cetuximab core Gene Group	Erlotinib core gene group
NEBL	2.44177	NA	NA	NA	NA	NA	-1.85621	-2.1798	-1.65586	-1.38415	-2.5434	NA	NA	-1.1844	NA	NA		Cetuximab core Gene Group
NEDD4L	-1.31436	NA	NA	NA	NA	NA	NA	NA	NA	NA	1.65073	NA	NA	NA	NA	-1.03935
NEDD9	1.76617	NA	NA	-1.83451	NA	-2.4126	-2.70664	-2.7206	-2.66111	-2.33101	-2.46868	NA	NA	-1.77174	NA	NA
NEIL1	1.75477	NA	NA	-1.66552	NA	NA	-2.12728	-2.00211	-2.29124	NA	NA	NA	NA	NA	NA	NA		Cetuximab core Gene Group	Erlotinib core gene group
NEK3	-1.11696	NA	NA	NA	NA	NA	1.04148	NA	NA	NA	NA	NA	NA	NA	NA	NA		Cetuximab core Gene Group
NEURL1B	1.72879	NA	NA	-2.17189	NA	-1.95474	-1.94788	-1.51047	-2.10974	-1.41368	-2.55809	NA	NA	-1.61693	NA	NA
NFASC	2.9847	NA	NA	-2.06697	NA	-1.47096	-2.21482	-1.87768	-1.8836	NA	-1.95919	NA	1.22255	-1.24651	NA	NA			Erlotinib core gene group
NFE2L3	-1.5666	NA	NA	NA	NA	NA	1.06971	1.15761	1.07145	NA	1.91603	NA	NA	NA	NA	NA		Cetuximab core Gene Group	Erlotinib core gene group
NFKB2	-1.72326	NA	NA	NA	NA	NA	1.00779	1.094	NA	NA	1.74098	NA	-1.1412	NA	NA	NA		Cetuximab core Gene Group	Erlotinib core gene group
NFKBIE	-1.21452	NA	NA	NA	NA	NA	NA	NA	NA	NA	1.23261	NA	NA	NA	NA	NA
NIPAL2	1.19585	NA	NA	NA	NA	NA	NA	NA	NA	NA	NA	NA	NA	NA	NA	NA
NIPSNAP3A	1.01588	NA	NA	NA	NA	NA	NA	-1.21477	NA	NA	NA	NA	NA	NA	NA	NA			Erlotinib core gene group
NMB	1.06	NA	NA	NA	NA	NA	NA	NA	NA	NA	NA	NA	NA	NA	NA	NA
NME1	-1.11457	NA	NA	NA	NA	NA	1.1518	1.10545	1.18713	NA	NA	NA	NA	NA	NA	NA		Cetuximab core Gene Group	Erlotinib core gene group
NME2	-1.3367	NA	NA	NA	NA	NA	NA	1.39088	NA	NA	NA	NA	NA	NA	NA	NA			Erlotinib core gene group
NMNAT3	1.15364	NA	NA	NA	NA	NA	NA	NA	NA	NA	-1.25548	NA	NA	NA	NA	NA
NMRK1	1.06874	NA	NA	NA	NA	NA	-1.10288	-1.1578	-1.11333	NA	NA	NA	NA	NA	NA	NA		Cetuximab core Gene Group	Erlotinib core gene group
NOC2L	-1.15085	NA	NA	NA	NA	NA	1.09789	1.32833	1.00323	NA	NA	NA	NA	NA	NA	NA		Cetuximab core Gene Group	Erlotinib core gene group
NOCT	-1.50011	NA	NA	NA	NA	NA	1.07696	1.08033	1.19949	NA	2.06741	NA	NA	NA	NA	NA		Cetuximab core Gene Group	Erlotinib core gene group
NOL6	-1.13414	NA	NA	NA	NA	NA	1.09947	1.19162	1.21364	NA	1.17197	NA	NA	NA	NA	NA		Cetuximab core Gene Group	Erlotinib core gene group
NOLC1	-1.00826	NA	NA	NA	NA	NA	1.01446	1.29523	1.21957	NA	1.06801	NA	NA	NA	NA	NA		Cetuximab core Gene Group	Erlotinib core gene group
NOP16	-1.12288	NA	NA	NA	NA	NA	1.24296	1.48231	1.6918	NA	1.46161	NA	NA	NA	NA	NA		Cetuximab core Gene Group	Erlotinib core gene group
NOP56	-1.0449	NA	NA	NA	NA	NA	1.02153	1.32109	1.16587	NA	NA	NA	NA	NA	NA	NA		Cetuximab core Gene Group	Erlotinib core gene group
NPM3	-1.03111	NA	NA	NA	NA	NA	1.13681	1.18102	1.33773	NA	NA	NA	NA	NA	NA	NA		Cetuximab core Gene Group	Erlotinib core gene group
NR2F2-AS1	1.81819	NA	NA	-1.38278	NA	NA	-2.35928	-1.69404	-1.86578	NA	NA	NA	NA	NA	NA	NA		Cetuximab core Gene Group	Erlotinib core gene group
NR4A1	1.88926	NA	NA	NA	NA	NA	NA	NA	NA	NA	-1.66198	NA	NA	NA	NA	NA
NRG1	-2.76354	NA	NA	NA	NA	NA	2.06273	2.73637	3.11497	1.18382	4.17002	NA	-1.56966	1.55316	NA	NA		Cetuximab core Gene Group
NRG4	2.32402	NA	1.08914	-1.44581	NA	NA	-1.55276	-2.12188	-1.81938	NA	-3.14109	NA	1.15832	-1.92557	NA	NA		Cetuximab core Gene Group	Erlotinib core gene group
NT5E	-4.41808	NA	NA	2.867	NA	2.24673	2.80484	3.72503	3.91893	2.80194	6.45538	NA	NA	3.4259	NA	-2.5313
NTN4	1.78403	NA	NA	-1.33493	NA	-1.12017	-1.99719	-2.4463	-2.32732	-1.22511	-2.53625	NA	1.21439	-1.4443	NA	NA
NWD1	3.13467	NA	NA	-2.83489	NA	-3.51971	-5.45581	-4.59142	-4.46278	NA	NA	NA	NA	NA	NA	NA			Erlotinib core gene group
OAF	-1.20898	NA	NA	NA	NA	1.23507	1.51361	1.51632	1.40709	1.25523	NA	NA	NA	NA	NA	NA
OBSCN	1.64083	NA	NA	NA	NA	NA	-1.52604	NA	-1.24389	NA	NA	NA	NA	NA	NA	NA		Cetuximab core Gene Group
OBSCN-AS1	2.4749	NA	NA	NA	NA	NA	-2.87065	-2.69691	-2.41736	NA	NA	NA	NA	NA	NA	NA		Cetuximab core Gene Group	Erlotinib core gene group
ODC1	-1.81848	NA	NA	1.27687	NA	NA	1.64266	1.63745	1.75433	NA	1.80428	NA	-1.18431	NA	NA	NA		Cetuximab core Gene Group	Erlotinib core gene group
OLFML2A	3.00632	NA	1.21836	-2.18333	NA	NA	-1.97337	-2.22761	-1.65271	NA	-3.0131	NA	1.91146	-1.71677	1.4103	NA		Cetuximab core Gene Group	Erlotinib core gene group
OLR1	1.1113	NA	NA	-2.08308	NA	-3.14487	-2.43693	-2.17601	-1.81102	-3.40104	NA	NA	-1.24888	-2.33716	NA	NA
ORAI3	1.98587	NA	NA	NA	NA	NA	-1.28003	-1.54158	-1.41655	NA	-2.10953	NA	1.08869	NA	NA	NA		Cetuximab core Gene Group	Erlotinib core gene group
OTUD1	1.40061	NA	NA	NA	NA	NA	NA	-1.71875	NA	NA	-1.70011	NA	NA	-1.47564	NA	NA			Erlotinib core gene group
PA2G4	-1.03925	NA	NA	NA	NA	NA	1.09988	1.19841	1.27714	NA	NA	NA	NA	NA	NA	NA		Cetuximab core Gene Group	Erlotinib core gene group
PALMD	3.41217	NA	1.31188	-3.55402	NA	-1.84392	-3.14482	-2.54347	-2.01065	NA	-2.75125	NA	1.60928	-2.64546	NA	NA			Erlotinib core gene group
PAPLN	1.67975	NA	NA	-2.03931	NA	-1.86448	-1.96068	-1.61364	-1.99815	NA	-1.67379	NA	NA	NA	NA	NA			Erlotinib core gene group
PAX8	-2.86685	NA	NA	1.77105	NA	NA	2.56611	2.34947	2.3117	NA	3.22783	NA	-1.87509	NA	NA	NA		Cetuximab core Gene Group	Erlotinib core gene group
PAX9	1.17599	NA	NA	NA	NA	NA	NA	NA	NA	NA	NA	NA	NA	NA	NA	NA
PBLD	1.24506	NA	NA	NA	NA	NA	NA	-1.12101	-1.14481	NA	-1.08678	NA	NA	NA	NA	NA			Erlotinib core gene group
PBX1	2.50493	NA	1.24711	-1.16259	NA	NA	-1.88267	-2.03258	-1.61008	NA	-2.5975	NA	1.38703	-1.1355	NA	NA		Cetuximab core Gene Group	Erlotinib core gene group
PBXIP1	1.69564	NA	NA	-1.19529	NA	-1.27338	-2.0242	-1.94307	-2.04884	NA	NA	NA	NA	NA	NA	NA			Erlotinib core gene group
PCDH10	2.0241	NA	NA	-1.08619	NA	NA	-1.44373	-1.53831	NA	NA	NA	NA	NA	-1.1023	NA	NA		Cetuximab core Gene Group	Erlotinib core gene group
PCDH18	1.72495	NA	NA	-1.96909	NA	-1.29734	-2.04839	-2.37504	-2.08018	-1.25723	NA	NA	1.12217	-1.93169	NA	NA
PCDHB14	3.31944	NA	NA	NA	NA	NA	-2.94352	-3.88194	-3.22893	NA	NA	NA	1.69168	NA	NA	NA		Cetuximab core Gene Group	Erlotinib core gene group
PCDHGA10	2.79388	NA	NA	NA	NA	NA	NA	-1.75123	-1.37401	NA	NA	NA	1.26357	NA	NA	NA			Erlotinib core gene group
PCDHGB2	3.43389	NA	NA	NA	NA	NA	-2.3928	-3.15298	-2.67598	NA	NA	NA	NA	NA	NA	NA		Cetuximab core Gene Group	Erlotinib core gene group
PCDHGB7	2.70614	NA	NA	-1.75137	NA	NA	-2.42604	-2.4283	-2.32238	NA	-2.1225	NA	1.6793	NA	NA	NA		Cetuximab core Gene Group	Erlotinib core gene group
PCMTD1	1.02207	NA	NA	NA	NA	NA	-1.05772	-1.14838	NA	NA	NA	NA	NA	NA	NA	NA		Cetuximab core Gene Group	Erlotinib core gene group
PCSK6	-1.29809	NA	NA	NA	NA	NA	NA	1.11018	NA	NA	1.32107	NA	NA	NA	NA	NA			Erlotinib core gene group
PCYOX1	1.10654	NA	NA	NA	NA	NA	NA	-1.28055	NA	NA	NA	NA	NA	NA	NA	NA			Erlotinib core gene group
PDCD1LG2	-4.4634	NA	NA	NA	NA	NA	NA	NA	NA	NA	3.387	NA	NA	1.74218	NA	NA
PDCD4	1.1551	NA	1.11083	NA	NA	NA	NA	-1.14308	NA	NA	NA	NA	NA	NA	NA	NA			Erlotinib core gene group
PDE1A	3.59251	NA	NA	NA	NA	NA	-2.60068	-2.94452	-2.6734	NA	-3.13248	NA	NA	NA	NA	NA		Cetuximab core Gene Group	Erlotinib core gene group
PDE4D	1.16768	NA	NA	NA	NA	NA	NA	NA	NA	NA	NA	NA	NA	NA	NA	NA
PDE5A	1.41143	NA	NA	NA	NA	NA	-1.18689	-1.49046	-1.17283	NA	-1.31328	NA	NA	NA	NA	NA		Cetuximab core Gene Group	Erlotinib core gene group
PDGFA	-1.60646	NA	NA	1.54376	NA	1.91199	2.47957	1.87373	1.87909	1.3053	1.23556	NA	NA	NA	NA	NA
PDGFB	-3.201	NA	-1.79662	NA	NA	NA	NA	3.87443	NA	NA	3.25907	NA	-2.91523	1.88125	NA	NA			Erlotinib core gene group
PDLIM1	1.19038	NA	NA	-1.07967	NA	NA	-1.22675	-1.21278	-1.02441	NA	-1.20947	NA	NA	NA	NA	NA		Cetuximab core Gene Group	Erlotinib core gene group
PDLIM2	-1.33235	NA	NA	NA	NA	NA	NA	1.28728	NA	NA	NA	NA	NA	1.01569	NA	NA			Erlotinib core gene group
PDLIM7	-1.30379	NA	NA	NA	NA	NA	1.11366	1.64521	1.18157	NA	1.29298	NA	NA	NA	NA	NA		Cetuximab core Gene Group	Erlotinib core gene group
PDSS1	-1.17739	NA	-1.08754	NA	NA	NA	1.14367	1.3528	1.15573	NA	NA	NA	NA	NA	NA	NA		Cetuximab core Gene Group	Erlotinib core gene group
PEAR1	-2.09982	NA	NA	NA	NA	NA	NA	1.62166	NA	2.0225	1.88642	NA	NA	2.29274	NA	NA
PECAM1	2.75034	NA	NA	NA	NA	-2.08948	-2.39418	NA	-1.99274	NA	-2.58051	NA	NA	NA	NA	NA
PELI2	2.07705	NA	1.61656	NA	NA	NA	-1.7083	-2.22468	-1.62275	NA	-1.83921	NA	1.83172	NA	NA	NA		Cetuximab core Gene Group	Erlotinib core gene group
PER3	1.27033	NA	1.01003	NA	NA	NA	-1.23929	-1.10318	-1.15153	NA	-1.05052	NA	NA	NA	NA	NA		Cetuximab core Gene Group	Erlotinib core gene group
PES1	-1.12501	NA	NA	NA	NA	NA	1.0906	1.47681	1.17343	NA	NA	NA	NA	NA	NA	NA		Cetuximab core Gene Group	Erlotinib core gene group
PFAS	-1.03555	NA	NA	NA	NA	NA	1.03286	1.12671	1.17635	NA	NA	NA	NA	NA	NA	NA		Cetuximab core Gene Group	Erlotinib core gene group
PFDN2	-1.16997	NA	NA	NA	NA	NA	1.20807	NA	1.07011	NA	NA	NA	NA	NA	NA	NA		Cetuximab core Gene Group
PGF	-1.2707	NA	NA	NA	NA	NA	NA	2.18448	1.24021	1.81477	1.7571	NA	NA	1.91645	NA	NA
PHEX	1.0203	NA	NA	NA	NA	NA	NA	NA	NA	NA	NA	NA	NA	NA	NA	NA
PHYH	1.50164	NA	NA	NA	NA	NA	NA	-1.34138	-1.08619	NA	-1.52724	NA	NA	NA	NA	NA			Erlotinib core gene group
PIEZO2	2.40759	NA	NA	NA	NA	NA	-2.88774	-3.52921	-2.47765	NA	-4.01027	NA	2.50437	NA	NA	NA		Cetuximab core Gene Group	Erlotinib core gene group
PIGZ	2.04028	NA	NA	NA	NA	NA	-1.69291	-1.7133	-1.9002	NA	-2.01644	NA	NA	NA	NA	NA		Cetuximab core Gene Group	Erlotinib core gene group
PIK3C2G	2.25033	NA	NA	NA	NA	NA	-2.57941	-2.38281	-2.15788	NA	NA	NA	1.66875	NA	NA	NA		Cetuximab core Gene Group	Erlotinib core gene group
PIK3R3	1.82125	NA	1.01947	NA	NA	NA	-1.72638	-1.83422	-1.47115	NA	-1.84336	NA	1.22357	NA	NA	NA		Cetuximab core Gene Group	Erlotinib core gene group
PIM1	-1.86318	NA	NA	NA	NA	1.03267	1.44325	NA	NA	NA	NA	NA	NA	NA	NA	NA
PINX1	-1.01953	NA	NA	NA	NA	NA	1.05864	1.16703	1.29154	NA	1.09585	NA	NA	NA	NA	NA		Cetuximab core Gene Group	Erlotinib core gene group
PIR	1.9194	NA	NA	NA	NA	NA	NA	-1.39034	NA	NA	-1.94474	NA	NA	-1.16478	NA	NA			Erlotinib core gene group
PITPNM3	1.62937	NA	1.19871	NA	NA	NA	-1.17482	NA	NA	NA	NA	NA	NA	NA	NA	NA		Cetuximab core Gene Group
PKIB	3.24244	NA	NA	NA	NA	NA	-1.85	-1.81311	NA	NA	NA	NA	NA	NA	NA	NA		Cetuximab core Gene Group	Erlotinib core gene group
PKMYT1	-1.08282	NA	NA	NA	NA	NA	NA	1.27286	1.02042	NA	NA	NA	NA	NA	NA	NA			Erlotinib core gene group
PLA2R1	2.11586	NA	NA	NA	NA	NA	-2.40646	-1.97396	-2.13074	NA	NA	NA	NA	NA	NA	NA		Cetuximab core Gene Group	Erlotinib core gene group
PLAU	-4.43035	NA	-1.1883	2.6886	NA	2.05174	3.25121	3.72955	3.4641	NA	5.48774	NA	-2.20591	2.17762	NA	NA			Erlotinib core gene group
PLB1	1.40881	NA	NA	-1.23543	NA	NA	-1.45572	-1.0462	-1.02093	NA	NA	NA	NA	NA	NA	NA		Cetuximab core Gene Group	Erlotinib core gene group
PLBD1	1.36787	NA	NA	-1.08397	NA	NA	-1.16457	-1.09249	NA	NA	NA	NA	NA	NA	NA	NA		Cetuximab core Gene Group	Erlotinib core gene group
PLCE1	1.94029	NA	NA	NA	NA	NA	-1.91195	NA	NA	NA	NA	NA	NA	NA	NA	NA		Cetuximab core Gene Group
PLD1	1.80824	NA	1.05987	NA	NA	NA	-1.96089	-1.96441	-1.7625	-1.06604	-1.63217	NA	NA	-1.05535	NA	NA		Cetuximab core Gene Group
PLEC	-2.33578	NA	-1.00202	1.45232	NA	1.14353	2.14944	2.79212	1.97641	NA	2.40216	NA	NA	1.55871	NA	NA			Erlotinib core gene group
PLEK2	-1.55453	NA	NA	NA	NA	NA	1.23644	1.41012	1.60737	NA	2.08631	NA	NA	NA	NA	NA		Cetuximab core Gene Group	Erlotinib core gene group
PLEKHA7	1.64987	NA	NA	-1.71909	NA	-1.34705	-1.81064	NA	NA	NA	NA	NA	NA	NA	NA	NA
PLEKHF2	1.14682	NA	NA	NA	NA	NA	-1.23442	-1.74229	NA	NA	NA	NA	1.13551	NA	NA	NA		Cetuximab core Gene Group	Erlotinib core gene group
PLEKHG1	1.14947	NA	NA	NA	NA	NA	NA	-1.25744	-1.05524	NA	NA	NA	NA	NA	NA	NA			Erlotinib core gene group
PLEKHG5	-1.82537	NA	NA	NA	NA	NA	1.31637	2.24293	1.31487	1.65603	2.25933	NA	NA	1.66567	NA	NA		Cetuximab core Gene Group
PLEKHH2	1.1911	NA	NA	NA	NA	NA	-1.13876	-1.03337	-1.27619	NA	NA	NA	NA	NA	NA	NA		Cetuximab core Gene Group	Erlotinib core gene group
PLEKHS1	4.44714	NA	NA	-4.72647	NA	-4.86168	-5.38753	NA	NA	NA	NA	NA	NA	NA	NA	NA
PLLP	-2.00854	NA	NA	1.67671	NA	1.82232	2.19639	3.37435	5.03518	2.69357	5.86612	NA	NA	2.55007	NA	NA
PLPP3	1.00481	NA	NA	NA	NA	NA	NA	NA	NA	NA	NA	NA	NA	NA	NA	NA
PLSCR4	2.65823	NA	1.36765	-1.43505	NA	NA	-2.60655	-3.048	-2.67179	-1.73446	NA	NA	1.31881	-1.93341	NA	NA		Cetuximab core Gene Group
PLXNA2	-1.48889	NA	NA	NA	NA	NA	1.47231	1.64819	1.52781	NA	1.75863	NA	NA	NA	NA	NA		Cetuximab core Gene Group	Erlotinib core gene group
PNRC1	1.98544	NA	1.36701	NA	NA	NA	-2.20131	-2.59763	-2.2974	-1.25686	NA	NA	1.32503	-1.05286	NA	NA		Cetuximab core Gene Group
PODNL1	2.20663	NA	NA	-1.59188	NA	NA	-1.61432	-1.18291	-1.2395	NA	NA	NA	NA	-1.41991	NA	NA		Cetuximab core Gene Group	Erlotinib core gene group
POLR3G	-1.28103	NA	NA	NA	NA	NA	1.157	1.36847	1.63263	NA	1.87807	NA	NA	NA	NA	NA		Cetuximab core Gene Group	Erlotinib core gene group
PON3	1.21256	NA	NA	NA	NA	NA	NA	NA	NA	NA	NA	NA	NA	NA	NA	NA
PORCN	-1.47499	NA	NA	NA	NA	NA	NA	1.0402	1.13538	1.06268	2.14119	NA	NA	1.15912	NA	NA
PPARA	1.0494	NA	NA	NA	NA	NA	NA	-1.15362	NA	NA	NA	NA	NA	NA	NA	NA			Erlotinib core gene group
PPIC	1.04483	NA	NA	NA	NA	NA	NA	-1.14295	NA	NA	-1.10292	NA	NA	NA	NA	NA			Erlotinib core gene group
PPIF	-1.45442	NA	NA	NA	NA	NA	1.03916	1.1526	1.26023	NA	1.83656	NA	-1.01223	NA	NA	NA		Cetuximab core Gene Group	Erlotinib core gene group
PPP1R14B	-1.21707	NA	NA	NA	NA	NA	1.20646	1.40464	1.35687	NA	NA	NA	NA	NA	NA	NA		Cetuximab core Gene Group	Erlotinib core gene group
PRKAG2	-1.05946	NA	NA	NA	NA	NA	NA	NA	NA	NA	NA	NA	NA	NA	NA	NA
PRMT5	-1.07392	NA	NA	NA	NA	NA	NA	NA	1.00731	NA	NA	NA	NA	NA	NA	NA
PROC	3.79819	NA	1.53403	-2.98599	NA	-1.82259	-3.29927	-3.35449	-3.02775	-2.01238	-4.73442	NA	1.35653	-3.1848	NA	NA
PROS1	1.31074	NA	NA	NA	NA	NA	NA	-1.42952	-1.07493	NA	NA	NA	NA	NA	NA	NA			Erlotinib core gene group
PROSER2	-1.08284	NA	NA	NA	NA	NA	NA	NA	NA	NA	NA	NA	NA	NA	NA	NA
PRR5L	2.43276	NA	NA	-2.56537	NA	-1.46414	-1.8779	-2.28904	-1.58212	-1.31005	-2.74753	NA	NA	-2.39159	NA	NA
PRR7-AS1	-1.92968	NA	NA	NA	NA	NA	1.9894	5.20079	3.2658	2.65921	3.58824	NA	NA	2.72558	NA	NA		Cetuximab core Gene Group
PRSS3	-1.60604	NA	NA	NA	NA	NA	NA	NA	NA	NA	NA	NA	NA	NA	NA	NA
PSAP	1.38119	NA	NA	NA	NA	NA	-1.21022	-1.69519	-1.36962	NA	-1.24609	NA	1.10826	NA	NA	NA		Cetuximab core Gene Group	Erlotinib core gene group
PSAPL1	3.28389	NA	NA	-4.48142	NA	NA	-3.902	-4.43184	NA	-3.03236	NA	NA	NA	NA	NA	NA		Cetuximab core Gene Group
PSAT1	-1.99169	NA	-1.25022	NA	NA	NA	1.94496	1.78481	2.16546	NA	1.28066	NA	NA	NA	NA	NA		Cetuximab core Gene Group	Erlotinib core gene group
PSCA	4.11568	NA	NA	-3.89138	NA	-3.55414	-5.15147	-4.16623	-4.3453	NA	NA	NA	NA	NA	NA	NA			Erlotinib core gene group
PSMD2	-1.22161	NA	NA	NA	NA	NA	NA	NA	NA	NA	NA	NA	NA	NA	NA	NA
PSMG3-AS1	1.43655	NA	NA	NA	NA	NA	-1.51934	-1.93342	-2.08622	NA	-2.54618	NA	NA	NA	NA	NA		Cetuximab core Gene Group	Erlotinib core gene group
PTK6	-1.73017	NA	NA	1.34326	NA	NA	NA	2.2472	NA	NA	2.01448	NA	NA	NA	NA	NA			Erlotinib core gene group
PTPRS	2.27733	NA	1.14484	-1.15138	NA	NA	-1.40556	-1.58558	-1.65302	NA	-2.49126	NA	1.42537	-1.03219	NA	NA		Cetuximab core Gene Group	Erlotinib core gene group
PUS1	-1.18663	NA	NA	NA	NA	NA	1.08542	1.84685	1.27367	NA	1.12592	NA	NA	NA	NA	NA		Cetuximab core Gene Group	Erlotinib core gene group
PUS10	1.15749	NA	NA	NA	NA	NA	-1.30322	-1.77802	-1.59914	NA	-1.84253	NA	NA	-1.12673	NA	NA		Cetuximab core Gene Group	Erlotinib core gene group
PVR	-1.31064	NA	NA	NA	NA	NA	1.05724	1.09144	NA	NA	1.31845	NA	NA	NA	NA	NA		Cetuximab core Gene Group	Erlotinib core gene group
PYCR1	-1.84265	NA	NA	NA	NA	NA	1.56632	2.29757	2.38278	NA	2.01126	NA	-1.50528	NA	NA	NA		Cetuximab core Gene Group	Erlotinib core gene group
QSOX2	-1.03626	NA	NA	NA	NA	NA	NA	NA	NA	NA	NA	NA	NA	NA	NA	NA
RAB11FIP4	1.32994	NA	NA	NA	NA	NA	-1.52901	-1.6319	-1.74981	NA	-1.94152	NA	NA	NA	NA	NA		Cetuximab core Gene Group	Erlotinib core gene group
RAB15	2.18031	NA	NA	NA	NA	NA	-1.58798	-1.09582	NA	NA	NA	NA	NA	NA	NA	NA		Cetuximab core Gene Group	Erlotinib core gene group
RAB26	3.90566	NA	NA	-4.15287	NA	-3.40473	-4.83985	-3.14758	-3.98092	NA	-4.46146	NA	NA	NA	NA	NA			Erlotinib core gene group
RAB27B	1.53782	NA	NA	NA	NA	NA	-1.2567	-1.79536	-1.33874	NA	-1.32353	NA	1.03247	-1.11907	NA	NA		Cetuximab core Gene Group	Erlotinib core gene group
RAB3B	-2.37526	NA	NA	1.37765	NA	NA	1.40679	1.86812	1.32551	NA	2.55089	NA	NA	1.26181	NA	NA		Cetuximab core Gene Group	Erlotinib core gene group
RAB40B	1.87743	NA	NA	NA	NA	NA	-1.75221	-2.17098	-2.01929	NA	-2.25932	NA	1.36511	NA	NA	NA		Cetuximab core Gene Group	Erlotinib core gene group
RAB7B	1.79918	NA	NA	-1.25481	NA	NA	NA	-1.07061	NA	NA	NA	NA	NA	NA	NA	NA			Erlotinib core gene group
RABL2A	1.38133	NA	NA	NA	NA	NA	NA	NA	-1.11976	NA	NA	NA	NA	NA	NA	NA
RAC2	-1.10303	NA	NA	NA	NA	NA	NA	1.39848	1.11597	1.35631	1.74924	NA	NA	1.08057	NA	NA
RAET1G	1.90433	NA	NA	-1.42937	NA	-1.50013	-2.57245	-2.31565	-1.84283	NA	NA	NA	1.34626	NA	NA	NA			Erlotinib core gene group
RALGPS1	1.06692	NA	NA	NA	NA	NA	-1.06142	NA	NA	NA	NA	NA	NA	NA	NA	NA		Cetuximab core Gene Group
RANBP1	-1.08876	NA	NA	NA	NA	NA	1.08927	1.01789	1.20386	NA	NA	NA	NA	NA	NA	NA		Cetuximab core Gene Group	Erlotinib core gene group
RANGAP1	-1.01587	NA	NA	NA	NA	NA	NA	1.34702	NA	NA	1.07379	NA	NA	NA	NA	NA			Erlotinib core gene group
RAP1GAP2	-1.1467	NA	NA	NA	NA	NA	1.10949	1.05392	1.0473	NA	NA	NA	NA	NA	NA	NA		Cetuximab core Gene Group	Erlotinib core gene group
RAPGEF3	-2.20416	NA	NA	NA	NA	NA	1.60897	2.48346	1.66288	3.06847	3.58616	NA	NA	3.1283	NA	-1.92113		Cetuximab core Gene Group
RAPGEFL1	1.23796	NA	NA	-1.10668	NA	NA	-1.19049	NA	NA	NA	NA	NA	NA	NA	NA	NA		Cetuximab core Gene Group
RARA	-1.09876	NA	NA	NA	NA	NA	1.33431	1.29687	NA	NA	NA	NA	NA	NA	NA	NA		Cetuximab core Gene Group	Erlotinib core gene group
RARRES3	2.91336	NA	NA	-3.00547	NA	-2.86591	-3.54279	-3.56046	-3.1478	NA	NA	NA	1.84172	NA	NA	NA			Erlotinib core gene group
RASSF6	2.23649	NA	1.1937	NA	NA	NA	-1.88573	-2.13711	-1.7174	NA	-1.51689	NA	1.22758	NA	NA	NA		Cetuximab core Gene Group	Erlotinib core gene group
RBBP8NL	2.43024	NA	NA	NA	NA	NA	-2.12324	NA	NA	NA	NA	NA	NA	NA	NA	NA		Cetuximab core Gene Group
RBP1	2.42702	NA	NA	-1.54745	NA	NA	-1.86795	-1.39622	-1.42601	NA	-1.66472	NA	NA	NA	NA	NA		Cetuximab core Gene Group	Erlotinib core gene group
RCSD1	3.4782	NA	NA	-4.29559	NA	-4.30212	-5.56637	-5.00923	-5.34089	-3.02668	-4.47781	NA	1.94929	-3.04467	NA	NA
RDH16	2.92496	NA	NA	NA	NA	NA	NA	NA	NA	NA	NA	NA	NA	NA	NA	NA
REEP6	2.35206	NA	NA	-1.61769	NA	-1.25478	-2.36217	-2.00914	-2.05427	NA	-2.21081	NA	NA	NA	NA	NA			Erlotinib core gene group
REL	1.08401	NA	NA	NA	NA	NA	NA	-1.09621	NA	NA	-1.06814	NA	NA	NA	NA	NA			Erlotinib core gene group
RELB	-1.55312	NA	NA	1.00962	NA	NA	1.02035	1.30104	NA	NA	1.85507	NA	-1.52548	NA	NA	NA		Cetuximab core Gene Group	Erlotinib core gene group
RELT	-1.00779	NA	NA	NA	NA	NA	NA	1.21671	NA	NA	1.17178	NA	NA	NA	NA	NA			Erlotinib core gene group
REPS2	1.28276	NA	NA	NA	NA	NA	-1.08071	-1.44688	-1.11094	NA	NA	NA	NA	NA	NA	NA		Cetuximab core Gene Group	Erlotinib core gene group
RETREG1	1.92032	NA	NA	NA	NA	NA	-1.47227	-1.57929	-1.31555	NA	-1.70088	NA	NA	NA	NA	NA		Cetuximab core Gene Group	Erlotinib core gene group
RFK	-1.1071	NA	NA	NA	NA	NA	NA	NA	NA	NA	1.07536	NA	NA	NA	NA	NA
RGS2	1.67083	NA	NA	NA	NA	NA	-1.70805	-1.53262	NA	NA	NA	NA	1.4044	NA	NA	NA		Cetuximab core Gene Group	Erlotinib core gene group
RHBDL2	1.38843	NA	NA	NA	NA	NA	-1.31303	NA	-1.15692	NA	-1.19265	NA	NA	NA	NA	NA		Cetuximab core Gene Group
RHOF	-1.89494	NA	NA	1.51163	NA	1.37333	1.44049	1.92267	1.41979	1.70176	1.93316	NA	NA	1.84267	NA	NA
RIMS1	6.26826	NA	NA	NA	NA	NA	-5.41131	-3.28903	NA	NA	NA	NA	NA	NA	NA	NA		Cetuximab core Gene Group	Erlotinib core gene group
RIMS2	1.19368	NA	NA	NA	NA	NA	NA	NA	NA	NA	NA	NA	NA	NA	NA	NA
RIPK4	1.43645	NA	NA	-1.09845	NA	NA	-1.72241	-1.88835	-1.71617	NA	-1.34639	NA	1.32804	NA	NA	NA		Cetuximab core Gene Group	Erlotinib core gene group
RNASE10	2.16803	NA	NA	NA	NA	NA	-1.04023	NA	NA	NA	NA	NA	NA	NA	NA	NA		Cetuximab core Gene Group
RNASEL	1.55931	NA	NA	NA	NA	NA	-1.11135	-1.46186	-1.09318	NA	-1.11909	NA	NA	-1.02839	NA	NA		Cetuximab core Gene Group	Erlotinib core gene group
RNF126	-1.05038	NA	NA	NA	NA	NA	NA	NA	NA	NA	NA	NA	NA	NA	NA	NA
RNF128	1.2973	NA	NA	NA	NA	NA	NA	-1.23288	NA	NA	-1.3302	NA	NA	NA	NA	NA			Erlotinib core gene group
RNF139-AS1	1.09564	NA	NA	NA	NA	NA	-1.24235	-1.05744	NA	NA	NA	NA	NA	NA	NA	NA		Cetuximab core Gene Group	Erlotinib core gene group
RNF152	2.39999	NA	NA	-1.46353	NA	NA	-2.05136	-2.18984	-1.64017	-1.28602	-1.62927	NA	NA	-1.55251	NA	NA		Cetuximab core Gene Group
RNF217-AS1	1.57443	NA	NA	NA	NA	NA	-1.5964	-1.18076	-1.52753	NA	NA	NA	NA	NA	NA	NA		Cetuximab core Gene Group	Erlotinib core gene group
ROR1	-1.60372	NA	NA	NA	NA	NA	1.31463	1.61405	NA	NA	NA	NA	-1.82594	NA	NA	NA		Cetuximab core Gene Group	Erlotinib core gene group
RPL10P13	-2.98365	NA	NA	1.88325	NA	1.89295	2.11801	3.42676	2.5103	2.68708	3.76991	NA	NA	2.65826	NA	NA
RPS6KA2	1.73022	NA	NA	NA	NA	NA	-1.39994	-1.39808	-1.67233	NA	-2.57629	NA	NA	NA	NA	NA		Cetuximab core Gene Group	Erlotinib core gene group
RPSAP52	-3.05342	NA	NA	2.13041	NA	2.32688	2.61155	4.5744	4.13729	2.73751	4.79138	NA	NA	2.55699	NA	NA
RPUSD1	-1.01715	NA	NA	NA	NA	NA	NA	NA	NA	NA	NA	NA	NA	NA	NA	NA
RRP1	-1.10675	NA	NA	NA	NA	NA	1.09777	1.62978	1.18136	NA	NA	NA	NA	NA	NA	NA		Cetuximab core Gene Group	Erlotinib core gene group
RRP12	-1.20908	NA	NA	NA	NA	NA	1.29977	1.57985	1.27922	NA	NA	NA	NA	NA	NA	NA		Cetuximab core Gene Group	Erlotinib core gene group
RRP9	-1.07786	NA	NA	NA	NA	NA	1.20842	1.37727	1.31427	NA	NA	NA	NA	NA	NA	NA		Cetuximab core Gene Group	Erlotinib core gene group
RRS1	-1.00867	NA	NA	NA	NA	NA	1.23894	1.72826	1.52883	NA	1.12156	NA	NA	NA	NA	NA		Cetuximab core Gene Group	Erlotinib core gene group
RSPH1	1.99947	NA	NA	NA	NA	NA	-1.50878	NA	-1.82101	NA	-2.34718	NA	NA	NA	NA	NA		Cetuximab core Gene Group
S100A2	-2.22963	NA	NA	1.00952	NA	1.01647	1.5264	1.31147	1.38994	NA	2.65755	NA	NA	NA	NA	NA			Erlotinib core gene group
S100A4	1.38532	NA	NA	-1.63221	NA	NA	-1.64915	NA	NA	NA	NA	NA	NA	NA	NA	NA		Cetuximab core Gene Group
SACS	-1.38778	NA	NA	NA	NA	NA	1.21037	1.12125	1.29023	NA	1.55468	NA	NA	NA	NA	NA		Cetuximab core Gene Group	Erlotinib core gene group
SAMD11	4.57378	NA	NA	NA	NA	NA	-2.68182	-4.92111	-4.6496	NA	-5.76249	NA	2.98397	NA	NA	NA		Cetuximab core Gene Group	Erlotinib core gene group
SAMD4A	-1.56304	NA	NA	NA	NA	NA	NA	1.0307	NA	NA	2.19952	NA	-1.17632	NA	-1.03239	NA			Erlotinib core gene group
SCARA3	2.11796	NA	NA	-1.51516	NA	NA	-1.47664	-1.23078	-1.24365	NA	-2.80418	NA	NA	-1.50669	NA	NA		Cetuximab core Gene Group	Erlotinib core gene group
SCD5	1.47412	NA	NA	NA	NA	NA	-1.26022	-1.03889	-1.21735	NA	-1.29276	NA	NA	NA	NA	NA		Cetuximab core Gene Group	Erlotinib core gene group
SCN9A	2.06559	NA	NA	NA	NA	NA	-1.76674	NA	-1.49372	NA	NA	NA	NA	NA	NA	NA		Cetuximab core Gene Group
SCPEP1	2.02712	NA	NA	-1.17656	NA	NA	-1.62539	-1.72858	-1.58897	NA	-1.93141	NA	NA	-1.05889	NA	NA		Cetuximab core Gene Group	Erlotinib core gene group
SDAD1P1	1.67963	NA	NA	NA	NA	NA	-1.63275	-1.56879	NA	NA	NA	NA	NA	NA	NA	NA		Cetuximab core Gene Group	Erlotinib core gene group
SDCCAG3	-1.10142	NA	NA	NA	NA	NA	NA	1.32744	1.18787	NA	1.27222	NA	NA	NA	NA	NA			Erlotinib core gene group
SEC16B	2.72823	NA	NA	-3.87984	NA	-2.93172	-3.66234	-3.16678	NA	NA	NA	NA	NA	NA	NA	NA			Erlotinib core gene group
SEMA3B	-1.71181	NA	NA	NA	NA	NA	NA	1.22784	NA	1.62455	NA	NA	NA	NA	NA	NA
SEMA7A	-4.0035	NA	-1.65992	1.56711	NA	1.24983	2.91399	4.07493	2.88382	1.89232	4.56707	NA	-2.18974	2.19557	NA	NA
SEPT6	1.47717	NA	NA	NA	NA	NA	-1.33405	-1.23346	-1.31312	NA	-1.5556	NA	NA	NA	NA	NA		Cetuximab core Gene Group	Erlotinib core gene group
SERPINB13	3.97104	NA	1.29481	-3.93265	NA	-2.70881	-3.98618	-4.26503	-3.4995	-2.57172	-3.3197	NA	1.68108	-3.78516	NA	NA
SERPINB3	3.13717	NA	NA	-5.33084	NA	-4.46964	-4.41535	-3.91636	-4.01064	-3.30915	NA	NA	NA	-4.11709	NA	NA
SERPINB4	4.50001	NA	NA	-4.9706	NA	-5.14424	-5.04863	-3.6149	NA	-4.08598	NA	NA	NA	NA	NA	NA
SERPINB8	-1.4126	NA	NA	1.0847	NA	NA	1.00598	NA	NA	NA	NA	NA	NA	NA	NA	NA		Cetuximab core Gene Group
SFN	-1.04964	NA	NA	NA	NA	NA	1.22799	1.25001	1.38332	NA	1.54932	NA	NA	NA	NA	NA		Cetuximab core Gene Group	Erlotinib core gene group
SFTA1P	-4.60339	NA	NA	NA	NA	NA	NA	3.2355	NA	NA	3.71085	NA	NA	NA	-1.83311	NA			Erlotinib core gene group
SGMS1-AS1	1.15801	NA	NA	NA	NA	NA	NA	-1.13276	-1.49488	NA	-2.20073	NA	NA	NA	NA	NA			Erlotinib core gene group
SH2B3	-1.0204	NA	NA	NA	NA	NA	1.07341	1.23459	1.23813	NA	1.01738	NA	NA	NA	NA	NA		Cetuximab core Gene Group	Erlotinib core gene group
SH2D2A	-1.91487	NA	NA	NA	NA	NA	NA	1.50764	NA	NA	NA	NA	NA	1.76874	NA	NA			Erlotinib core gene group
SH2D3A	-1.35745	NA	NA	1.22284	NA	NA	1.17255	1.50545	1.12464	1.00194	1.26228	NA	NA	1.27296	NA	NA		Cetuximab core Gene Group
SH2D3C	3.53654	NA	NA	-3.09392	NA	-3.50115	-4.656	-4.00819	-4.37189	NA	NA	NA	NA	NA	NA	NA			Erlotinib core gene group
SH2D5	-4.11081	NA	-1.35502	2.00371	NA	1.86503	3.21216	3.15327	3.03124	2.10391	4.34018	NA	NA	2.2539	NA	NA
SH3BGRL	1.23433	NA	NA	NA	NA	NA	-1.13306	-1.67417	-1.25598	NA	-1.2525	NA	NA	NA	NA	NA		Cetuximab core Gene Group	Erlotinib core gene group
SH3PXD2A-AS1	-1.83936	NA	NA	NA	NA	1.61094	1.67483	1.72833	1.85655	2.21768	2.28526	NA	NA	1.57668	NA	NA
SH3TC2	-2.91364	NA	NA	NA	NA	NA	1.22786	2.44427	2.79212	1.55255	5.77408	NA	NA	1.68562	NA	-2.9757		Cetuximab core Gene Group
SHISA4	1.94286	NA	NA	NA	NA	NA	-1.66345	-1.33482	NA	NA	NA	NA	NA	NA	NA	NA		Cetuximab core Gene Group	Erlotinib core gene group
SHMT2	-1.28188	NA	NA	NA	NA	NA	1.18662	1.14466	1.19363	NA	NA	NA	NA	NA	NA	NA		Cetuximab core Gene Group	Erlotinib core gene group
SIDT1	2.85349	NA	NA	NA	NA	NA	-3.74326	-3.14325	-3.60459	NA	NA	NA	NA	NA	NA	NA		Cetuximab core Gene Group	Erlotinib core gene group
SLC12A4	-1.32403	NA	NA	NA	NA	NA	NA	NA	NA	NA	1.61105	NA	NA	NA	NA	NA
SLC15A2	1.01113	NA	NA	NA	NA	NA	NA	NA	NA	NA	-1.2901	NA	NA	NA	NA	NA
SLC16A3	-1.0359	NA	NA	NA	NA	NA	NA	1.29774	NA	NA	1.51244	NA	NA	NA	NA	NA			Erlotinib core gene group
SLC19A1	-1.22818	NA	-1.1383	NA	NA	NA	1.12591	2.29951	1.78205	1.20518	1.70461	NA	-1.11012	1.18008	NA	NA		Cetuximab core Gene Group
SLC1A3	1.36857	NA	NA	-1.433	NA	-1.34512	-1.57497	NA	NA	NA	NA	NA	NA	NA	NA	NA
SLC1A5	-1.4289	NA	NA	NA	NA	NA	1.35344	1.47232	1.51934	NA	1.04729	NA	-1.07709	NA	NA	NA		Cetuximab core Gene Group	Erlotinib core gene group
SLC22A23	1.32605	NA	NA	NA	NA	NA	NA	-1.18875	NA	NA	-1.17711	NA	NA	NA	NA	NA			Erlotinib core gene group
SLC25A19	-1.74525	NA	-1.29265	NA	NA	NA	1.44466	1.29098	1.15154	NA	NA	NA	NA	NA	NA	NA		Cetuximab core Gene Group	Erlotinib core gene group
SLC25A22	-1.11219	NA	NA	NA	NA	NA	NA	1.06831	NA	NA	1.30359	NA	NA	NA	NA	NA			Erlotinib core gene group
SLC25A27	1.0929	NA	NA	NA	NA	NA	NA	NA	NA	NA	NA	NA	NA	NA	NA	NA
SLC25A42	1.6776	NA	NA	NA	NA	NA	-1.82284	-1.63	-1.55024	NA	-1.57162	NA	NA	-1.15955	NA	NA		Cetuximab core Gene Group	Erlotinib core gene group
SLC27A1	1.31526	NA	NA	NA	NA	NA	-1.5604	-1.33502	-1.62961	NA	-1.56964	NA	NA	NA	NA	NA		Cetuximab core Gene Group	Erlotinib core gene group
SLC27A3	1.42144	NA	NA	-1.55794	NA	-1.37972	-1.50036	-1.06221	-1.15929	NA	NA	NA	NA	NA	NA	NA			Erlotinib core gene group
SLC28A3	-4.89206	NA	NA	NA	NA	NA	NA	NA	NA	NA	NA	NA	NA	NA	NA	NA
SLC29A1	-1.53613	NA	NA	NA	NA	NA	1.57925	2.14637	2.09402	1.26047	1.91691	NA	NA	1.2457	NA	NA		Cetuximab core Gene Group
SLC29A3	1.89478	NA	NA	-1.49443	NA	NA	-1.64401	-2.12039	-1.74363	NA	-2.35644	NA	1.32507	-1.4628	NA	NA		Cetuximab core Gene Group	Erlotinib core gene group
SLC2A1-AS1	1.99073	NA	NA	NA	NA	NA	-1.82295	-1.37513	NA	NA	NA	NA	NA	NA	NA	NA		Cetuximab core Gene Group	Erlotinib core gene group
SLC2A12	2.03147	NA	NA	-2.77199	NA	-2.5383	-2.97996	-2.51173	-3.01411	-1.90583	NA	NA	NA	-2.1399	NA	NA
SLC2A13	1.18511	NA	NA	NA	NA	NA	NA	NA	-1.03539	NA	NA	NA	NA	NA	NA	NA
SLC37A3	-1.02539	NA	NA	NA	NA	NA	NA	NA	NA	NA	1.18701	NA	NA	NA	NA	NA
SLC38A5	-1.17605	NA	NA	NA	NA	NA	NA	1.20476	1.21863	NA	1.49114	NA	NA	NA	NA	NA			Erlotinib core gene group
SLC39A11	1.08994	NA	NA	NA	NA	NA	NA	NA	-1.03253	NA	-1.17723	NA	NA	NA	NA	NA
SLC43A3	-2.00502	NA	-1.25899	NA	NA	NA	1.57985	2.47479	2.27547	1.09586	2.57392	NA	-1.39453	1.44604	NA	NA		Cetuximab core Gene Group
SLC44A3	1.0152	NA	NA	NA	NA	-1.0386	-1.24872	-1.13224	NA	NA	NA	NA	NA	NA	NA	NA			Erlotinib core gene group
SLC45A3	-1.06666	NA	NA	NA	NA	NA	NA	1.872	1.37494	NA	1.56907	NA	NA	NA	NA	NA			Erlotinib core gene group
SLC45A4	-1.26402	NA	NA	NA	NA	NA	NA	1.74063	NA	NA	1.30777	NA	-1.35427	NA	NA	NA			Erlotinib core gene group
SLC47A2	4.04704	NA	NA	-2.79474	NA	NA	-3.07952	-3.34489	-3.15293	NA	-4.63298	NA	1.98157	-2.95396	NA	NA		Cetuximab core Gene Group	Erlotinib core gene group
SLC5A12	1.99945	NA	NA	NA	NA	NA	-1.1326	-1.41123	-1.23737	NA	NA	NA	NA	NA	NA	NA		Cetuximab core Gene Group	Erlotinib core gene group
SLC5A6	-1.08994	NA	NA	NA	NA	NA	1.00857	1.34567	1.17105	NA	1.13286	NA	NA	NA	NA	NA		Cetuximab core Gene Group	Erlotinib core gene group
SLCO1A2	1.84772	NA	1.31604	NA	NA	NA	-1.86505	-1.88957	-2.04196	NA	NA	NA	NA	NA	NA	NA		Cetuximab core Gene Group	Erlotinib core gene group
SLITRK6	2.83474	NA	1.78766	NA	NA	NA	-1.70619	-2.47054	-1.75668	NA	-2.89438	NA	2.04745	NA	NA	NA		Cetuximab core Gene Group	Erlotinib core gene group
SMAD3	-1.0398	NA	NA	NA	NA	NA	1.01725	NA	NA	NA	NA	NA	NA	NA	NA	NA		Cetuximab core Gene Group
SMAD6	2.15917	NA	NA	-2.36869	NA	NA	-2.67828	-2.35771	-2.17989	NA	-2.67799	NA	NA	NA	NA	NA		Cetuximab core Gene Group	Erlotinib core gene group
SMARCD3	3.06108	NA	NA	-2.42416	NA	NA	-2.4577	-2.75219	-2.99386	NA	-3.2983	NA	NA	-1.94783	NA	NA		Cetuximab core Gene Group	Erlotinib core gene group
SMIM14	2.20008	NA	NA	NA	NA	NA	-1.52701	-2.118	-1.67347	-1.55729	-2.24631	NA	NA	-1.63258	NA	NA		Cetuximab core Gene Group
SMTN	-1.44904	NA	NA	NA	NA	NA	1.06005	1.44625	NA	NA	NA	NA	NA	NA	NA	NA		Cetuximab core Gene Group	Erlotinib core gene group
SNAPC4	-1.03431	NA	NA	NA	NA	NA	NA	1.52999	NA	NA	NA	NA	NA	NA	NA	NA			Erlotinib core gene group
SNCAIP	1.56781	NA	NA	NA	NA	NA	-1.25747	-1.72748	-1.76568	NA	-1.88758	NA	NA	NA	NA	NA		Cetuximab core Gene Group	Erlotinib core gene group
SNCG	1.23988	NA	NA	NA	NA	NA	-1.17492	-1.40919	-1.26661	NA	-1.40357	NA	1.21079	NA	NA	NA		Cetuximab core Gene Group	Erlotinib core gene group
SNHG1	-1.06615	NA	NA	NA	NA	NA	NA	1.51635	1.1031	NA	NA	NA	NA	NA	NA	NA			Erlotinib core gene group
SNHG15	-1.19922	NA	NA	NA	NA	NA	1.14095	1.54301	1.27621	NA	1.2527	NA	NA	NA	NA	NA		Cetuximab core Gene Group	Erlotinib core gene group
SNHG17	-1.09204	NA	NA	NA	NA	NA	1.08422	1.96521	1.17204	NA	NA	NA	NA	1.0812	NA	NA		Cetuximab core Gene Group	Erlotinib core gene group
SNORA65	-1.49956	NA	NA	NA	NA	NA	NA	1.25543	1.97153	NA	1.8776	NA	NA	NA	NA	NA			Erlotinib core gene group
SNORD46	-1.50038	NA	NA	NA	NA	NA	NA	NA	NA	NA	NA	NA	NA	NA	NA	NA
SNTA1	1.8359	NA	NA	NA	NA	NA	-1.70986	-1.48062	-1.73062	NA	NA	NA	NA	NA	NA	NA		Cetuximab core Gene Group	Erlotinib core gene group
SORCS2	1.63132	NA	NA	NA	NA	NA	-1.17481	-1.88147	-1.8215	NA	-2.70948	NA	1.40703	NA	NA	NA		Cetuximab core Gene Group	Erlotinib core gene group
SP140	-2.21147	NA	NA	NA	NA	NA	1.63592	2.46884	2.02919	1.7559	3.49584	NA	NA	2.18433	NA	-1.46587		Cetuximab core Gene Group
SPATA6	1.26191	NA	NA	NA	NA	NA	NA	NA	-1.08732	NA	-1.41299	NA	NA	NA	NA	NA
SPHK1	-2.76711	NA	NA	1.34419	NA	1.349	2.32654	2.35831	2.38836	1.60583	3.50326	NA	NA	1.60259	NA	NA
SPINK5	1.36509	NA	NA	NA	NA	NA	-1.21762	NA	NA	NA	NA	NA	NA	NA	NA	NA		Cetuximab core Gene Group
SPOCK3	2.6773	NA	NA	NA	NA	NA	-2.70532	-2.59018	-2.5288	NA	NA	NA	NA	NA	NA	NA		Cetuximab core Gene Group	Erlotinib core gene group
SPP1	1.42082	NA	NA	NA	NA	NA	NA	NA	NA	NA	NA	NA	1.09934	NA	NA	NA
SPRED2	-1.2436	NA	NA	NA	NA	NA	1.31025	1.57616	1.62844	NA	1.6016	NA	NA	NA	NA	NA		Cetuximab core Gene Group	Erlotinib core gene group
SPRY4	-3.85399	NA	NA	2.36458	NA	2.11459	3.07117	4.63176	4.23773	3.22287	5.76394	NA	NA	3.47262	NA	NA
SPTLC3	1.57863	NA	NA	NA	NA	NA	-1.3211	-1.68009	-1.64656	NA	-1.98546	NA	NA	-1.05466	NA	NA		Cetuximab core Gene Group	Erlotinib core gene group
SRGAP3	2.95248	NA	NA	-2.99288	NA	-2.65043	-3.58598	-3.53258	-3.28976	NA	-3.28814	NA	NA	-2.57764	NA	NA			Erlotinib core gene group
SRM	-1.2195	NA	NA	NA	NA	NA	1.23725	1.46869	1.46674	NA	1.0543	NA	-1.02552	NA	NA	NA		Cetuximab core Gene Group	Erlotinib core gene group
SSBP2	2.30543	NA	1.523	NA	NA	NA	-1.80023	-1.9549	-1.28601	NA	-1.86604	NA	1.51099	NA	NA	NA		Cetuximab core Gene Group	Erlotinib core gene group
SSBP3	1.38115	NA	NA	NA	NA	NA	-1.13362	-1.01829	NA	NA	NA	NA	NA	NA	NA	NA		Cetuximab core Gene Group	Erlotinib core gene group
SSH3	1.0871	NA	NA	NA	NA	NA	-1.25545	-1.10102	-1.10176	NA	NA	NA	NA	NA	NA	NA		Cetuximab core Gene Group	Erlotinib core gene group
SSPN	2.89123	NA	1.31406	-1.25984	NA	-1.2232	-2.52069	-2.34669	-2.22801	-1.16496	-1.87869	NA	1.17091	-1.20408	NA	NA
SSSCA1	-1.3254	NA	NA	NA	NA	NA	NA	NA	1.09438	NA	1.2524	NA	NA	NA	NA	NA
ST6GALNAC2	2.27561	NA	1.32731	-1.73012	NA	NA	-1.60933	-2.00793	-1.805	NA	NA	NA	1.29434	-2.14068	1.41532	NA		Cetuximab core Gene Group	Erlotinib core gene group
STAMBPL1	-1.16575	NA	NA	NA	NA	NA	1.24735	1.2418	1.27276	NA	1.6721	NA	NA	NA	NA	NA		Cetuximab core Gene Group	Erlotinib core gene group
STC2	-3.53518	NA	-2.19209	NA	NA	NA	3.38957	5.3923	4.32538	NA	3.55499	NA	NA	NA	NA	NA		Cetuximab core Gene Group	Erlotinib core gene group
STEAP1	-1.01006	NA	NA	NA	NA	NA	NA	NA	NA	NA	1.1384	NA	NA	NA	NA	NA
STEAP3	1.37213	NA	NA	NA	NA	NA	-1.18903	NA	NA	NA	-1.05462	NA	NA	NA	NA	NA		Cetuximab core Gene Group
STEAP4	2.02282	NA	NA	-1.83057	NA	-3.49108	-4.67751	-4.33696	-4.79012	-3.64989	NA	NA	NA	-1.99141	NA	NA
STON1	3.93009	NA	1.96128	-2.13332	NA	-2.08721	-4.03893	-4.38134	-3.81632	-1.65297	-3.77948	NA	2.69987	-1.71106	NA	NA
STOX2	1.04777	NA	NA	NA	NA	NA	NA	NA	NA	NA	NA	NA	NA	NA	NA	NA
STX1A	-2.27888	NA	NA	1.6709	NA	1.61814	1.94256	2.43465	1.90991	2.67692	2.823	NA	NA	2.73798	NA	NA
SULT1A1	1.30852	NA	NA	-1.02969	NA	NA	NA	-1.01488	NA	NA	-1.16635	NA	NA	NA	NA	NA			Erlotinib core gene group
SURF2	-1.14054	NA	NA	NA	NA	NA	1.11037	1.03159	NA	NA	NA	NA	NA	NA	NA	NA		Cetuximab core Gene Group	Erlotinib core gene group
SYNE1	1.38938	NA	NA	NA	NA	NA	-1.07141	-1.16206	-1.31567	NA	-1.84104	NA	NA	NA	NA	NA		Cetuximab core Gene Group	Erlotinib core gene group
SYNE2	1.21074	NA	NA	NA	NA	NA	NA	NA	NA	NA	NA	NA	NA	NA	NA	NA
SYNM	1.58145	NA	NA	-1.33643	NA	-1.02522	-1.6114	-1.21033	-1.33855	NA	-1.20032	NA	NA	NA	NA	NA			Erlotinib core gene group
SYNPO	2.71535	NA	NA	NA	NA	NA	-3.52842	-3.50197	-3.51701	NA	-2.36904	NA	1.91544	NA	NA	NA		Cetuximab core Gene Group	Erlotinib core gene group
SYTL3	-1.76719	NA	NA	NA	NA	NA	1.24036	1.61372	1.01002	NA	1.80226	NA	NA	1.269	NA	NA		Cetuximab core Gene Group	Erlotinib core gene group
TACSTD2	1.16504	NA	NA	NA	NA	NA	-1.0135	-1.25026	-1.02968	NA	-1.13648	NA	NA	NA	NA	NA		Cetuximab core Gene Group	Erlotinib core gene group
TAF4B	-1.03061	NA	NA	NA	NA	NA	1.09139	1.04465	1.10882	NA	1.01095	NA	NA	NA	NA	NA		Cetuximab core Gene Group	Erlotinib core gene group
TAPT1-AS1	2.41531	NA	2.66883	NA	NA	NA	-1.92666	-1.7332	-1.78357	NA	-2.72173	NA	NA	NA	NA	NA		Cetuximab core Gene Group	Erlotinib core gene group
TBC1D9	1.39207	NA	NA	NA	NA	NA	-1.7017	-1.79204	-1.65543	NA	NA	NA	NA	NA	NA	NA		Cetuximab core Gene Group	Erlotinib core gene group
TCEAL1	1.25208	NA	NA	NA	NA	NA	-1.29001	-1.42699	-1.03635	NA	NA	NA	NA	NA	NA	NA		Cetuximab core Gene Group	Erlotinib core gene group
TCOF1	-1.24963	NA	NA	NA	NA	NA	1.20892	1.86369	1.32556	NA	1.10071	NA	NA	NA	NA	NA		Cetuximab core Gene Group	Erlotinib core gene group
TCP11L2	1.00046	NA	1.12975	NA	NA	NA	-1.38182	-1.44975	-1.38679	NA	NA	NA	NA	NA	NA	NA		Cetuximab core Gene Group	Erlotinib core gene group
TELO2	-1.13977	NA	NA	NA	NA	NA	NA	1.29563	NA	NA	NA	NA	NA	NA	NA	NA			Erlotinib core gene group
TERT	-2.58804	NA	NA	NA	NA	NA	2.16916	4.40198	3.30138	2.40468	3.66456	NA	NA	2.73305	NA	NA		Cetuximab core Gene Group
TESK2	1.19179	NA	NA	NA	NA	NA	-1.13652	-1.5138	-1.4161	NA	NA	NA	NA	NA	NA	NA		Cetuximab core Gene Group	Erlotinib core gene group
TET1	1.34791	NA	NA	NA	NA	NA	-1.46886	-1.36432	-1.3798	NA	-1.05896	NA	NA	NA	NA	NA		Cetuximab core Gene Group	Erlotinib core gene group
TFEB	1.71961	NA	NA	-1.57698	NA	NA	-1.16532	NA	-1.02933	NA	-1.75938	NA	NA	-1.10877	NA	NA		Cetuximab core Gene Group
TFPI	1.43707	NA	NA	-1.16312	NA	-1.17933	-1.80013	-1.45868	-1.71465	NA	-1.09078	NA	NA	NA	NA	NA			Erlotinib core gene group
TGFA	-2.91397	NA	NA	1.49505	NA	1.22739	2.08344	2.12656	2.35172	1.17733	4.02716	NA	NA	1.44948	NA	NA
TGFB1	-1.44487	NA	NA	1.2087	NA	1.54488	1.68973	1.68585	1.39407	NA	1.4763	NA	NA	NA	NA	NA			Erlotinib core gene group
TGM2	-4.86977	NA	NA	NA	NA	NA	2.365	4.94355	3.87834	3.22172	7.33937	NA	NA	3.7026	NA	-3.45167		Cetuximab core Gene Group
THBS3	1.46322	NA	1.29831	NA	NA	NA	-1.72365	-1.35809	-1.58883	NA	NA	NA	NA	NA	NA	NA		Cetuximab core Gene Group	Erlotinib core gene group
TIMM10	-1.03493	NA	NA	NA	NA	NA	1.06571	1.17115	1.14546	NA	NA	NA	NA	NA	NA	NA		Cetuximab core Gene Group	Erlotinib core gene group
TIMM44	-1.12538	NA	NA	NA	NA	NA	1.12248	1.42554	1.37319	NA	NA	NA	NA	NA	NA	NA		Cetuximab core Gene Group	Erlotinib core gene group
TIMP1	-1.39744	NA	NA	NA	NA	NA	1.56478	2.35485	1.98237	1.19219	1.57976	NA	-1.17403	1.23285	NA	NA		Cetuximab core Gene Group
TIMP2	1.07927	NA	NA	-1.06364	NA	-1.04949	-1.37684	-1.68621	-1.36857	NA	NA	NA	NA	NA	NA	NA			Erlotinib core gene group
TLCD2	2.03309	NA	NA	NA	NA	-1.28519	-2.13298	-1.47703	-1.87397	-1.1787	-1.58398	NA	NA	NA	NA	NA
TLR1	4.35369	NA	NA	NA	NA	-2.72115	-3.71199	-3.22256	-3.80132	NA	-4.44955	NA	NA	NA	NA	NA			Erlotinib core gene group
TLR3	1.27651	NA	NA	-1.16125	NA	-1.19072	-1.5826	-2.05695	-2.02475	-1.22093	-1.67702	NA	NA	-1.18922	NA	NA
TLR5	2.13617	NA	NA	NA	NA	NA	-2.81684	-2.86512	-2.84903	NA	-2.32543	NA	NA	-1.46533	NA	NA		Cetuximab core Gene Group	Erlotinib core gene group
TLR6	1.22184	NA	NA	NA	NA	NA	NA	NA	NA	NA	NA	NA	NA	NA	NA	1.21867
TM4SF19	-2.36066	NA	NA	1.38907	NA	1.55296	1.65364	1.79653	NA	1.88143	NA	NA	NA	1.72266	NA	NA
TMC4	2.0955	NA	NA	-1.34035	NA	-1.31321	-2.09485	-1.97197	-2.03336	NA	NA	NA	1.33809	NA	NA	NA			Erlotinib core gene group
TMC5	-1.56602	NA	NA	NA	NA	NA	1.40808	2.15703	1.34477	NA	1.60399	NA	-1.56387	NA	NA	NA		Cetuximab core Gene Group	Erlotinib core gene group
TMCC2	1.85219	NA	NA	NA	NA	NA	-1.41874	-1.74162	-1.34922	NA	-1.84977	NA	1.55346	NA	NA	NA		Cetuximab core Gene Group	Erlotinib core gene group
TMEM156	-1.64671	NA	NA	1.76021	NA	NA	NA	2.30734	NA	2.36437	2.56888	NA	NA	2.53673	NA	NA
TMEM158	-2.5883	NA	NA	1.8648	NA	NA	2.17963	NA	2.04797	NA	4.03003	NA	NA	NA	NA	NA		Cetuximab core Gene Group
TMEM52B	1.40682	NA	NA	-1.43918	NA	-1.78353	-2.07404	-1.55414	-1.35345	-1.59854	NA	NA	NA	-1.24911	NA	NA
TMEM53	1.18711	NA	NA	NA	NA	NA	-1.15873	NA	-1.0011	NA	NA	NA	NA	NA	NA	NA		Cetuximab core Gene Group
TMEM8B	1.17968	NA	NA	NA	NA	NA	-1.08667	-1.20821	-1.31365	NA	-1.54457	NA	NA	NA	NA	NA		Cetuximab core Gene Group	Erlotinib core gene group
TMOD2	1.42209	NA	NA	NA	NA	NA	-1.2297	-1.69828	-1.29853	NA	-1.25128	NA	1.00101	NA	NA	NA		Cetuximab core Gene Group	Erlotinib core gene group
TMPRSS13	1.61783	NA	NA	NA	NA	NA	-1.93106	-1.71656	-1.67224	NA	NA	NA	NA	NA	NA	NA		Cetuximab core Gene Group	Erlotinib core gene group
TMPRSS4	2.11132	NA	NA	-1.34117	NA	-1.07835	-2.00847	NA	NA	NA	NA	NA	NA	NA	NA	NA
TNFAIP3	-4.18815	NA	NA	1.56554	NA	NA	1.79776	2.308	1.4113	NA	4.68421	NA	-2.07985	1.25779	NA	NA		Cetuximab core Gene Group	Erlotinib core gene group
TNFRSF10A	-1.51464	NA	NA	1.00908	NA	NA	1.37417	1.76952	1.78689	NA	2.15237	NA	NA	1.13173	NA	NA		Cetuximab core Gene Group	Erlotinib core gene group
TNFRSF10B	-1.10894	NA	NA	1.0157	NA	NA	1.01047	1.04092	1.06919	NA	1.19105	NA	NA	NA	NA	NA		Cetuximab core Gene Group	Erlotinib core gene group
TNFRSF10D	-1.11342	NA	NA	NA	NA	NA	NA	NA	1.08943	NA	1.36659	NA	NA	NA	NA	NA
TNFRSF12A	-1.87408	NA	-1.23959	NA	NA	NA	2.17015	1.52247	1.75674	NA	1.60117	NA	-1.00959	NA	NA	NA		Cetuximab core Gene Group	Erlotinib core gene group
TNFRSF25	-1.52761	NA	NA	NA	NA	NA	NA	2.56562	1.56347	1.67918	2.2863	NA	NA	1.57294	NA	NA
TNFSF10	2.90592	NA	NA	-3.19891	NA	-2.25122	-3.34666	-3.31654	-3.12297	-1.72987	NA	NA	1.57795	-2.66214	NA	NA
TNFSF15	-3.38006	NA	NA	1.95958	NA	NA	NA	2.8457	2.37081	NA	3.5196	NA	-1.7935	2.27386	NA	NA			Erlotinib core gene group
TNFSF9	1.92092	NA	NA	NA	NA	NA	-1.85902	-1.86784	-1.75211	NA	NA	NA	1.28324	NA	NA	NA		Cetuximab core Gene Group	Erlotinib core gene group
TNNI2	2.90866	NA	1.7245	-2.89182	NA	NA	-3.28509	-2.39433	-2.27336	NA	NA	NA	NA	NA	NA	NA		Cetuximab core Gene Group	Erlotinib core gene group
TNNT3	4.22578	NA	NA	-3.33805	NA	NA	-3.79378	-3.50252	-2.86427	NA	-3.90378	NA	2.05645	NA	NA	NA		Cetuximab core Gene Group	Erlotinib core gene group
TNS1	3.06293	NA	1.75171	NA	NA	-2.02734	-3.76563	-3.38112	-3.27405	NA	NA	NA	1.69327	NA	NA	NA			Erlotinib core gene group
TNS3	1.73166	NA	NA	-2.0174	NA	-1.94686	-2.37207	-2.63136	-2.35522	-1.56413	-1.81398	NA	1.05677	-1.63355	NA	NA
TP53INP1	3.36699	NA	NA	NA	NA	-2.64817	-4.95881	-5.52406	-4.92812	-2.52054	NA	NA	3.021	NA	NA	NA
TP53TG1	1.9429	NA	NA	-1.32228	NA	-1.08515	-2.01767	-2.10474	-1.86104	NA	-2.13282	NA	1.00921	-1.33098	NA	NA			Erlotinib core gene group
TP73	3.71387	NA	NA	-5.30134	NA	-4.10454	-5.69323	NA	NA	NA	NA	NA	NA	NA	NA	NA
TPCN1	-1.01621	NA	NA	NA	NA	NA	NA	NA	NA	NA	NA	NA	NA	NA	NA	NA
TPM1	1.42175	NA	NA	NA	NA	NA	NA	NA	NA	NA	-1.43274	NA	NA	NA	NA	NA
TRAF1	-3.60049	NA	-2.04009	NA	NA	NA	NA	3.8723	NA	NA	4.58789	NA	-4.48313	NA	NA	NA			Erlotinib core gene group
TRANK1	1.68476	NA	NA	-1.83335	NA	-1.61767	-2.14893	-2.07105	-2.32018	-1.08381	NA	NA	NA	-1.30203	NA	NA
TRAPPC6A	2.21689	NA	NA	-1.31767	NA	NA	-1.69436	-2.09081	-1.70952	NA	NA	NA	1.15295	-1.25889	NA	NA		Cetuximab core Gene Group	Erlotinib core gene group
TRIB3	-2.07566	NA	NA	1.76881	NA	NA	2.03936	2.31946	2.54053	NA	1.62962	NA	-1.4918	NA	NA	NA		Cetuximab core Gene Group	Erlotinib core gene group
TRIM15	-3.49316	NA	NA	NA	NA	NA	NA	NA	NA	NA	NA	NA	NA	NA	NA	NA
TRIM31	5.00115	NA	NA	NA	NA	NA	-3.69889	NA	NA	NA	NA	NA	NA	NA	NA	NA		Cetuximab core Gene Group
TRIM47	-1.38209	NA	NA	NA	NA	NA	1.44244	2.03518	1.56528	NA	1.50397	NA	-1.65276	NA	NA	NA		Cetuximab core Gene Group	Erlotinib core gene group
TRIM8	-2.00699	NA	NA	NA	NA	NA	1.34553	1.90733	1.59877	NA	2.23391	NA	-1.16849	1.13564	NA	NA		Cetuximab core Gene Group	Erlotinib core gene group
TRMT1	-1.00946	NA	NA	NA	NA	NA	1.10093	1.33781	1.20899	NA	1.08927	NA	NA	NA	NA	NA		Cetuximab core Gene Group	Erlotinib core gene group
TRPV3	-3.82611	NA	NA	2.15839	NA	NA	NA	2.17754	NA	NA	4.91494	NA	NA	2.06642	NA	NA			Erlotinib core gene group
TRPV4	2.03992	NA	NA	-1.98115	NA	-2.20683	-2.20375	-2.06323	-2.09298	-1.72193	NA	NA	NA	NA	NA	NA
TSC22D1-AS1	2.16614	NA	NA	-1.80562	NA	NA	-2.21065	NA	NA	NA	NA	NA	NA	NA	NA	NA		Cetuximab core Gene Group
TTC22	1.68716	NA	NA	-1.71654	NA	NA	-1.48512	-1.08306	-1.24317	NA	-1.69972	NA	NA	-1.16693	NA	NA		Cetuximab core Gene Group	Erlotinib core gene group
TTLL12	-1.06036	NA	NA	NA	NA	NA	NA	1.22016	1.27136	NA	NA	NA	NA	NA	NA	NA			Erlotinib core gene group
TUBA1B	-1.01566	NA	NA	NA	NA	NA	NA	NA	NA	NA	NA	NA	NA	NA	NA	NA
TUBA1C	-1.16286	NA	-1.01382	NA	NA	NA	NA	NA	1.01217	NA	1.01425	NA	NA	NA	NA	NA
TUBBP5	1.66779	NA	NA	NA	NA	NA	NA	NA	NA	NA	NA	NA	NA	NA	NA	NA
TXNIP	3.25604	NA	NA	NA	NA	NA	-3.61891	-4.20206	-3.19755	NA	-2.40271	NA	3.26215	NA	NA	NA		Cetuximab core Gene Group	Erlotinib core gene group
TYSND1	1.01134	NA	NA	NA	NA	NA	NA	NA	NA	NA	-1.31264	NA	NA	NA	NA	NA
UBA7	2.03463	NA	NA	-2.81082	NA	-2.372	-2.76952	-2.72748	-2.78735	-1.30994	-1.89953	NA	1.40325	-1.74542	NA	NA
UBASH3B	-1.74599	NA	NA	NA	NA	NA	1.68963	1.871	1.55019	NA	1.72468	NA	NA	NA	NA	NA		Cetuximab core Gene Group	Erlotinib core gene group
UBE2S	-1.21347	NA	NA	NA	NA	NA	1.04001	NA	NA	NA	NA	NA	NA	NA	NA	NA		Cetuximab core Gene Group
UGT1A1	2.33614	NA	NA	-1.48005	NA	NA	-1.54652	-1.5084	-1.21564	NA	-1.96275	NA	NA	-1.43569	NA	NA		Cetuximab core Gene Group	Erlotinib core gene group
UGT1A10	3.76956	NA	NA	-2.69391	NA	-2.04824	-3.00144	-3.27967	-2.59378	-1.98901	-3.66964	NA	1.2892	-2.62955	NA	NA
UGT1A13P	4.52239	NA	NA	NA	NA	NA	-2.29647	NA	NA	NA	NA	NA	NA	NA	NA	NA		Cetuximab core Gene Group
UGT1A2P	2.44611	NA	NA	-1.70343	NA	NA	-1.84447	NA	-1.63465	NA	-2.3678	NA	NA	NA	NA	NA		Cetuximab core Gene Group
UGT1A3	2.09475	NA	NA	NA	NA	NA	-1.89372	NA	NA	NA	NA	NA	NA	NA	NA	NA		Cetuximab core Gene Group
UGT1A4	2.63722	NA	NA	-1.85299	NA	NA	-2.28696	NA	NA	NA	-2.08782	NA	NA	NA	NA	NA		Cetuximab core Gene Group
UGT1A5	2.76386	NA	NA	NA	NA	NA	NA	NA	NA	NA	-2.35287	NA	NA	NA	NA	NA
UGT1A6	2.22538	NA	NA	-1.6301	NA	NA	-1.84545	-1.90456	-1.73266	NA	-2.23285	NA	NA	-1.62196	NA	NA		Cetuximab core Gene Group	Erlotinib core gene group
UGT1A7	2.48117	NA	NA	-1.77423	NA	NA	-2.10925	-1.72637	-1.68531	NA	-1.73949	NA	NA	NA	NA	NA		Cetuximab core Gene Group	Erlotinib core gene group
UGT1A9	3.2431	NA	NA	NA	NA	NA	-3.10325	NA	NA	NA	NA	NA	NA	NA	NA	NA		Cetuximab core Gene Group
UNC13D	-2.26226	NA	-1.22548	NA	NA	NA	1.59459	1.79254	1.3582	NA	2.16273	NA	NA	NA	NA	NA		Cetuximab core Gene Group	Erlotinib core gene group
UNC5B	2.89873	NA	NA	NA	NA	NA	-2.35027	-2.25926	NA	NA	-2.2417	NA	1.30789	NA	NA	NA		Cetuximab core Gene Group	Erlotinib core gene group
UNC5B-AS1	4.83944	NA	NA	NA	NA	NA	-4.98517	-5.11134	-4.32804	NA	NA	NA	NA	NA	NA	NA		Cetuximab core Gene Group	Erlotinib core gene group
UPP1	-2.27448	NA	NA	1.79361	NA	NA	1.75656	1.99503	NA	NA	2.47701	NA	NA	NA	NA	NA		Cetuximab core Gene Group	Erlotinib core gene group
VARS	-1.17194	NA	NA	NA	NA	NA	1.06139	1.19316	1.15105	NA	NA	NA	NA	NA	NA	NA		Cetuximab core Gene Group	Erlotinib core gene group
VASH1	1.68348	NA	NA	NA	NA	NA	NA	NA	-1.57398	NA	-2.13187	NA	NA	NA	NA	NA
VAV3	3.14348	NA	1.14755	-2.91734	NA	-1.78455	-2.9156	-2.59815	-2.13742	-1.12264	-2.8187	NA	1.46465	-2.25249	NA	NA
VEGFA	-2.07805	NA	NA	1.70962	NA	NA	2.22611	2.80288	2.41325	NA	2.65902	NA	NA	2.08636	NA	NA		Cetuximab core Gene Group	Erlotinib core gene group
VEGFD	3.59316	NA	NA	NA	NA	NA	NA	NA	NA	NA	NA	NA	NA	NA	NA	NA
VGLL3	1.179	NA	NA	NA	NA	-1.00843	-1.32444	-1.87633	-1.31757	-1.55013	-1.46944	NA	NA	NA	NA	NA
VILL	3.55684	NA	NA	-2.92036	NA	-2.53035	-3.20262	-1.6415	-2.5844	NA	-3.0025	NA	NA	NA	NA	NA			Erlotinib core gene group
VIPR1	2.14984	NA	NA	-1.55867	NA	NA	-1.83366	-2.06796	-1.71968	NA	-2.51899	NA	1.2392	-1.44601	NA	NA		Cetuximab core Gene Group	Erlotinib core gene group
VMAC	1.58822	NA	NA	NA	NA	NA	-1.98187	-1.83157	-2.10381	NA	NA	NA	NA	NA	NA	NA		Cetuximab core Gene Group	Erlotinib core gene group
VPS9D1	1.35552	NA	NA	-1.55384	NA	NA	-1.68527	-1.5344	-1.85029	NA	NA	NA	NA	-1.34994	NA	NA		Cetuximab core Gene Group	Erlotinib core gene group
VPS9D1-AS1	-1.0513	NA	NA	NA	NA	NA	1.10275	1.47251	1.41697	NA	NA	NA	NA	NA	NA	NA		Cetuximab core Gene Group	Erlotinib core gene group
VSIR	1.68148	NA	NA	-1.85565	NA	NA	-1.40886	-1.99166	-1.75321	NA	NA	NA	1.34114	-1.6965	NA	NA		Cetuximab core Gene Group	Erlotinib core gene group
VSNL1	1.91905	NA	NA	-1.74249	NA	NA	-1.21104	-1.36193	NA	NA	NA	NA	NA	-1.99974	NA	NA		Cetuximab core Gene Group	Erlotinib core gene group
VTCN1	3.21978	NA	NA	NA	NA	NA	-3.09849	-3.73968	-2.83332	NA	NA	NA	2.54043	NA	NA	NA		Cetuximab core Gene Group	Erlotinib core gene group
VWF	2.98948	NA	NA	NA	NA	NA	-3.23654	-2.08914	-3.03512	NA	-3.00936	NA	NA	NA	NA	NA		Cetuximab core Gene Group	Erlotinib core gene group
WASHC3	1.09808	NA	NA	NA	NA	NA	NA	-1.03385	NA	NA	NA	NA	NA	NA	NA	NA			Erlotinib core gene group
WDR62	-1.2526	NA	NA	NA	NA	NA	1.17152	1.48872	NA	NA	NA	NA	NA	NA	NA	NA		Cetuximab core Gene Group	Erlotinib core gene group
WDR63	1.97092	NA	NA	NA	NA	NA	-1.2841	-1.29523	NA	NA	NA	NA	NA	NA	NA	NA		Cetuximab core Gene Group	Erlotinib core gene group
WDR74	-1.02544	NA	NA	NA	NA	NA	NA	1.04563	1.01294	NA	NA	NA	NA	NA	NA	NA			Erlotinib core gene group
WDR78	1.28887	NA	NA	NA	NA	NA	-1.17633	-1.02169	-1.18178	NA	-1.36208	NA	NA	NA	NA	NA		Cetuximab core Gene Group	Erlotinib core gene group
WHRN	1.6282	NA	NA	NA	NA	NA	-1.18042	-1.18565	-1.26511	NA	NA	NA	1.62076	NA	NA	NA		Cetuximab core Gene Group	Erlotinib core gene group
WNK4	-1.33046	NA	NA	NA	NA	NA	NA	NA	NA	NA	NA	NA	NA	NA	NA	NA
WNT10A	2.89289	NA	NA	-2.32194	NA	-1.33967	-2.47908	-3.03923	-2.42358	-1.27619	-3.89756	NA	1.75577	-2.2533	NA	1.46069
WNT4	6.63421	NA	NA	NA	NA	NA	-5.35454	-4.96184	-4.37683	-3.48987	-6.49284	NA	NA	-3.03984	NA	NA		Cetuximab core Gene Group
WNT7A	-1.39445	NA	NA	NA	NA	NA	1.05029	1.74195	1.67391	NA	2.33173	NA	NA	NA	NA	NA		Cetuximab core Gene Group	Erlotinib core gene group
WNT9A	2.31302	NA	2.12445	NA	NA	NA	NA	NA	NA	NA	NA	NA	1.5889	NA	NA	NA
XBP1	-1.01539	NA	NA	NA	NA	NA	NA	NA	1.0632	NA	NA	NA	NA	NA	NA	NA
XCL1	1.61019	NA	NA	NA	NA	NA	-1.29036	NA	NA	NA	NA	NA	NA	NA	NA	NA		Cetuximab core Gene Group
YARS	-1.21563	NA	NA	NA	NA	NA	1.25985	1.29283	1.27571	NA	NA	NA	-1.01161	NA	NA	NA		Cetuximab core Gene Group	Erlotinib core gene group
YPEL2	3.15725	NA	2.34267	NA	NA	NA	-2.49035	-2.77858	-2.85286	NA	NA	NA	2.15058	NA	NA	NA		Cetuximab core Gene Group	Erlotinib core gene group
YPEL5	1.00595	NA	1.04911	NA	NA	NA	-1.25383	-1.6479	-1.55731	NA	NA	NA	NA	NA	NA	NA		Cetuximab core Gene Group	Erlotinib core gene group
YRDC	-1.14891	NA	NA	NA	NA	NA	NA	1.19893	1.37923	NA	1.47967	NA	NA	NA	NA	NA			Erlotinib core gene group
ZBED2	-4.07259	NA	NA	NA	NA	NA	NA	2.15881	2.53175	NA	6.43667	NA	NA	NA	NA	-3.96522			Erlotinib core gene group
ZBED5-AS1	1.04982	NA	NA	NA	NA	NA	NA	-1.12616	NA	NA	NA	NA	NA	NA	NA	NA			Erlotinib core gene group
ZBTB20	1.16351	NA	NA	NA	NA	NA	-1.32867	-1.37274	-1.42751	NA	NA	NA	NA	NA	NA	NA		Cetuximab core Gene Group	Erlotinib core gene group
ZBTB42	2.03841	NA	NA	NA	NA	NA	-1.7471	NA	NA	NA	NA	NA	NA	NA	NA	NA		Cetuximab core Gene Group
ZBTB7C	5.50824	NA	NA	NA	NA	NA	-5.07321	NA	NA	NA	NA	NA	NA	NA	NA	NA		Cetuximab core Gene Group
ZC3H6	1.38316	NA	NA	NA	NA	NA	-1.36668	-1.68832	-1.76908	NA	-1.51586	NA	1.03387	NA	NA	NA		Cetuximab core Gene Group	Erlotinib core gene group
ZFP14	1.75185	NA	NA	NA	NA	NA	-1.33179	-1.67302	-1.37157	NA	-1.60714	NA	NA	-1.04757	NA	NA		Cetuximab core Gene Group	Erlotinib core gene group
ZMIZ1	1.17854	NA	NA	NA	NA	NA	NA	-1.29499	-1.11893	NA	-1.4694	NA	NA	NA	NA	NA			Erlotinib core gene group
ZMIZ1-AS1	1.61549	NA	NA	NA	NA	NA	-1.02176	-1.4253	-1.54877	NA	-2.27539	NA	NA	NA	NA	NA		Cetuximab core Gene Group	Erlotinib core gene group
ZNF296	-1.14654	NA	NA	NA	NA	NA	NA	NA	NA	NA	NA	NA	NA	NA	NA	NA
ZNF362	1.41154	NA	NA	-1.28505	NA	NA	-1.2239	-1.22838	-1.11005	NA	-1.85064	NA	NA	-1.0414	NA	NA		Cetuximab core Gene Group	Erlotinib core gene group
ZNF593	-1.00624	NA	NA	NA	NA	NA	NA	NA	1.19964	NA	NA	NA	NA	NA	NA	NA
ZNF598	-1.62829	NA	NA	NA	NA	NA	1.34903	1.60898	1.43537	NA	1.59555	NA	NA	1.05604	NA	NA		Cetuximab core Gene Group	Erlotinib core gene group
ZNF608	4.40311	NA	NA	-3.0512	NA	-2.40075	-4.25966	-3.07419	NA	NA	-3.09844	NA	NA	-2.35609	NA	NA			Erlotinib core gene group
ZNF658	1.24894	NA	NA	NA	NA	NA	-1.05188	-1.18225	-1.07354	NA	NA	NA	NA	NA	NA	NA		Cetuximab core Gene Group	Erlotinib core gene group
ZNF697	-1.49383	NA	NA	1.20547	NA	NA	1.08335	1.0705	1.04585	NA	1.44854	NA	NA	1.08523	NA	NA		Cetuximab core Gene Group	Erlotinib core gene group
ZNF704	1.01582	NA	NA	NA	NA	NA	NA	NA	NA	NA	NA	NA	NA	NA	NA	NA
ZNF846	1.33173	NA	NA	NA	NA	NA	-1.78733	-1.6733	-1.77174	NA	-1.22444	NA	NA	NA	NA	NA		Cetuximab core Gene Group	Erlotinib core gene group
ZNF862	1.56556	NA	1.25795	NA	NA	NA	-1.27594	-1.5983	-1.74105	NA	-2.05535	NA	NA	NA	NA	NA		Cetuximab core Gene Group	Erlotinib core gene group
ZSCAN31	2.04097	NA	1.31106	-1.21555	NA	NA	-2.17685	-2.34341	-2.05863	-1.15514	-2.59905	NA	1.17754	-1.48879	NA	NA		Cetuximab core Gene Group
EGR1	NA	NA	NA	NA	1.8959	NA	NA	NA	NA	1.06511	NA	NA	NA	NA	NA	1.2036
EGR3	NA	NA	NA	NA	2.7948	2.75016	NA	2.08028	1.82697	3.20593	NA	NA	NA	2.01682	NA	1.63223
TMEM40	NA	NA	NA	NA	-1.02281	NA	NA	NA	NA	NA	NA	NA	NA	NA	NA	-1.51581
UCA1	NA	NA	NA	NA	-1.00183	NA	NA	NA	NA	NA	NA	NA	NA	NA	NA	-1.20841
ADIRF	NA	NA	1.14367	NA	NA	NA	NA	NA	NA	NA	NA	NA	1.30472	NA	NA	NA
AQP3	NA	NA	1.30732	NA	NA	NA	-1.42253	NA	NA	NA	NA	NA	NA	1.64921	NA	NA		Cetuximab core Gene Group
CALCOCO1	NA	NA	1.02282	NA	NA	NA	-1.49144	-1.42669	-1.614	NA	NA	NA	NA	NA	NA	NA		Cetuximab core Gene Group	Erlotinib core gene group
CCNG2	NA	NA	1.12527	NA	NA	NA	-1.71651	-2.13414	-1.96237	-1.15464	NA	NA	NA	-1.22147	NA	NA		Cetuximab core Gene Group
CREBRF	NA	NA	1.19765	NA	NA	NA	-1.57614	-1.56995	-1.46582	NA	NA	NA	NA	NA	NA	NA		Cetuximab core Gene Group	Erlotinib core gene group
DHRS13	NA	NA	-1.00038	NA	NA	NA	NA	NA	NA	NA	NA	NA	NA	NA	NA	NA
FSTL3	NA	NA	-1.66308	NA	NA	-1.16901	NA	NA	NA	-1.19023	NA	NA	-1.76777	NA	NA	NA
IL32	NA	NA	-3.62755	-1.80662	NA	-3.24933	NA	2.15823	NA	-2.49782	NA	NA	-4.65478	NA	NA	-5.38172
IL6R	NA	NA	1.50171	1.20087	NA	1.64982	NA	NA	NA	NA	NA	NA	1.6174	NA	NA	NA
MMP1	NA	NA	2.88596	NA	NA	NA	NA	NA	2.93835	4.7039	NA	NA	NA	4.17297	NA	NA
NOTCH3	NA	NA	1.53217	NA	NA	NA	NA	-1.19636	NA	NA	NA	NA	1.87059	NA	NA	NA			Erlotinib core gene group
SAA1	NA	NA	-2.9849	-1.74813	NA	-3.82802	NA	NA	NA	-2.37018	NA	NA	-2.75351	NA	NA	NA
SEMA3C	NA	NA	1.02409	NA	NA	NA	-2.04921	-2.17242	-1.34406	NA	NA	NA	NA	NA	NA	-4.13016		Cetuximab core Gene Group	Erlotinib core gene group
SOX2	NA	NA	2.11194	NA	NA	NA	NA	NA	NA	NA	NA	NA	NA	NA	NA	NA
TNC	NA	NA	-3.03113	NA	NA	NA	NA	3.48802	2.52325	NA	4.19191	NA	-3.87307	NA	NA	NA			Erlotinib core gene group
ABCA7	NA	NA	NA	-1.20821	NA	-1.0672	-1.13439	NA	-1.1874	NA	NA	NA	NA	NA	NA	NA
ACSL5	NA	NA	NA	-1.77747	NA	-1.66947	-2.06146	-2.18914	-2.26476	-1.27196	NA	NA	NA	-1.37612	NA	-2.30192
ADAMTS15	NA	NA	NA	-2.2497	NA	-1.87017	-1.98498	-1.68453	-2.15772	NA	-2.67324	NA	NA	-1.59825	NA	NA			Erlotinib core gene group
ADAMTSL4	NA	NA	NA	-1.78108	NA	-1.5286	-1.91443	-1.11502	-1.24741	NA	NA	NA	NA	NA	NA	-4.41783			Erlotinib core gene group
ALDH1A3	NA	NA	NA	NA	NA	1.01837	NA	NA	NA	NA	NA	NA	NA	NA	NA	NA
ALPP	NA	NA	NA	-5.12301	NA	-4.94305	-4.47152	-3.80699	NA	NA	NA	NA	NA	NA	NA	NA			Erlotinib core gene group
ANKRD29	NA	NA	NA	1.32926	NA	2.03906	NA	1.48018	NA	1.63278	NA	NA	NA	NA	NA	NA
ANKRD65	NA	NA	NA	NA	NA	-1.47436	-1.88349	NA	-1.50741	NA	NA	NA	NA	NA	NA	NA
ANO9	NA	NA	NA	-1.2773	NA	-1.02975	-1.44963	NA	-1.30264	NA	NA	NA	NA	NA	NA	NA
ANTXR2	NA	NA	NA	2.00047	NA	1.67276	1.21001	NA	NA	1.35205	NA	NA	NA	1.68301	NA	NA
ANXA8	NA	NA	NA	-1.16703	NA	-1.12123	-1.18802	-1.2875	-1.1163	NA	NA	NA	NA	NA	NA	NA			Erlotinib core gene group
ANXA8L1	NA	NA	NA	-1.34188	NA	-1.20526	-1.15676	-1.37445	-1.39469	-1.03629	NA	NA	NA	-1.16632	NA	NA
APOL1	NA	NA	NA	-1.34586	NA	-1.20392	-1.44311	-1.31498	-1.41013	NA	NA	NA	NA	NA	NA	NA			Erlotinib core gene group
APOL3	NA	NA	NA	-1.45718	NA	-1.30747	-1.3631	-1.03259	-1.18158	NA	NA	NA	NA	NA	NA	NA			Erlotinib core gene group
AREG	NA	NA	NA	2.09211	NA	1.81202	2.35782	1.92617	2.36721	1.48549	2.99267	NA	NA	1.76299	NA	NA
ARHGAP45	NA	NA	NA	-2.63068	NA	-2.46412	-1.88613	NA	NA	NA	NA	NA	NA	NA	NA	NA
ASB9	NA	NA	NA	-1.29075	NA	-1.1627	-1.17992	NA	NA	NA	NA	NA	NA	NA	NA	NA
ATOH8	NA	NA	NA	NA	NA	-5.31662	NA	-5.52865	NA	NA	NA	NA	NA	NA	NA	NA			Erlotinib core gene group
ATP8B3	NA	NA	NA	-1.83742	NA	-1.84054	-1.45188	NA	NA	NA	NA	NA	NA	NA	NA	NA
ATXN1	NA	NA	NA	NA	NA	-1.10575	-1.21567	NA	-1.08511	NA	NA	NA	NA	NA	NA	NA
BCL2	NA	NA	NA	1.29561	NA	1.16632	1.15273	1.15192	1.37175	NA	NA	NA	NA	NA	NA	NA			Erlotinib core gene group
C11orf71	NA	NA	NA	-1.5014	NA	-1.2864	-1.72617	-1.8352	-1.61799	NA	NA	NA	NA	NA	NA	NA			Erlotinib core gene group
C11orf86	NA	NA	NA	-3.9543	NA	-2.51716	NA	NA	NA	NA	NA	NA	NA	-3.20683	NA	NA
C19orf66	NA	NA	NA	-1.21469	NA	-1.17591	-1.06485	NA	-1.36286	NA	NA	NA	NA	NA	NA	-1.43501
C1S	NA	NA	NA	-3.59124	NA	-2.88771	-2.85993	-2.64593	-2.62689	-1.94302	NA	NA	NA	-2.68198	NA	NA
C9orf84	NA	NA	NA	NA	NA	-1.14493	-1.29176	NA	NA	NA	NA	NA	NA	NA	NA	NA
CASC10	NA	NA	NA	-1.17512	NA	-1.08853	NA	NA	-1.23937	-1.38376	-2.1757	NA	NA	-1.46012	NA	NA
CASZ1	NA	NA	NA	NA	NA	-1.06852	-1.19483	-1.00002	NA	NA	NA	NA	NA	NA	NA	NA			Erlotinib core gene group
CCL5	NA	NA	NA	-4.72643	NA	-5.85456	NA	NA	NA	NA	NA	NA	NA	NA	NA	NA
CD44	NA	NA	NA	NA	NA	1.00583	NA	NA	NA	NA	1.48993	NA	NA	NA	NA	NA
CDK18	NA	NA	NA	-1.19131	NA	-1.03601	NA	NA	NA	NA	NA	NA	NA	NA	NA	NA
CIITA	NA	NA	NA	-4.83112	NA	-3.47086	-4.99618	-3.97352	-4.37346	NA	NA	NA	2.83893	NA	NA	NA			Erlotinib core gene group
CITED2	NA	NA	NA	-1.02381	NA	-1.05133	-1.43938	-1.57742	-1.61695	NA	NA	NA	NA	NA	NA	NA			Erlotinib core gene group
CTSS	NA	NA	NA	-1.77875	NA	-2.42509	-2.89243	-3.10811	-3.03372	-1.46185	NA	NA	1.62677	NA	NA	-5.87662
CXCL10	NA	NA	NA	-3.83276	NA	-3.88877	NA	NA	NA	NA	NA	NA	NA	NA	NA	NA
CXCL11	NA	NA	NA	-3.67858	NA	-4.14181	NA	NA	NA	-2.46895	NA	NA	-2.47423	-2.01356	NA	NA
CXCL9	NA	NA	NA	NA	NA	-4.30506	NA	NA	NA	NA	NA	NA	NA	NA	NA	NA
DBNDD1	NA	NA	NA	-1.27889	NA	-1.42203	-1.41049	NA	-1.26148	NA	NA	NA	NA	NA	NA	NA
DDX58	NA	NA	NA	-1.54398	NA	-1.40228	-1.01828	NA	-1.04007	NA	NA	NA	NA	NA	NA	NA
DDX60	NA	NA	NA	-1.96917	NA	-1.45543	-1.57659	-1.07685	-1.47255	NA	NA	NA	NA	NA	NA	NA			Erlotinib core gene group
DDX60L	NA	NA	NA	-1.07901	NA	-1.18082	-1.03885	NA	NA	NA	NA	NA	NA	NA	NA	-2.29787
DHX58	NA	NA	NA	-2.74848	NA	-2.08578	-1.82397	NA	-1.67667	NA	NA	NA	NA	NA	NA	NA
DUSP5	NA	NA	NA	1.84713	NA	1.53262	1.33455	NA	1.34204	1.24998	2.55605	NA	NA	1.56488	NA	NA
ELFN2	NA	NA	NA	NA	NA	2.55001	3.15945	4.68792	3.68528	4.365	NA	NA	NA	3.34657	NA	NA
EPSTI1	NA	NA	NA	-2.23482	NA	-2.69707	-1.44047	-1.09197	-1.58516	NA	NA	NA	NA	NA	NA	-3.78657			Erlotinib core gene group
ERRFI1	NA	NA	NA	1.98592	NA	1.33074	1.58056	1.67659	2.20853	1.25806	1.91703	NA	NA	1.91484	NA	NA
ETV7	NA	NA	NA	-1.9584	NA	-1.85437	-1.78479	-1.82992	-1.58803	-1.26864	NA	NA	NA	-1.40231	NA	NA
FAM83A	NA	NA	NA	1.16759	NA	1.13111	1.24062	1.75688	1.61895	1.36466	3.04235	NA	NA	1.40469	NA	NA
FAT4	NA	NA	NA	-1.79238	NA	-1.87099	-2.03318	-2.06778	-2.0332	-1.44467	-1.80625	NA	NA	-1.35903	NA	NA
FGD2	NA	NA	NA	-1.24015	NA	-1.16735	-1.17259	NA	-1.12175	NA	NA	NA	NA	NA	NA	NA
FGD3	NA	NA	NA	-3.78258	NA	-2.94753	-2.96836	-2.46673	-2.91365	NA	NA	NA	NA	NA	NA	NA			Erlotinib core gene group
FGF1	NA	NA	NA	NA	NA	-2.92744	-3.00734	-2.42016	-2.8012	NA	NA	NA	NA	NA	NA	NA			Erlotinib core gene group
FILIP1L	NA	NA	NA	-1.87903	NA	-2.2881	-2.44141	-1.21134	NA	-1.70209	NA	NA	NA	-1.28823	NA	NA
FOXD1	NA	NA	NA	1.27711	NA	1.36301	1.22115	NA	NA	NA	NA	NA	NA	NA	NA	NA
FSTL1	NA	NA	NA	NA	NA	-1.0623	-1.05262	-1.35354	-1.25048	-1.10962	NA	NA	NA	NA	NA	NA
GALNT5	NA	NA	NA	NA	NA	-1.13987	-1.19697	-1.27873	-1.24986	-1.10122	NA	NA	NA	NA	NA	NA
GBP1P1	NA	NA	NA	NA	NA	-2.32103	-3.44528	-3.23923	-2.85639	NA	NA	NA	NA	NA	NA	NA			Erlotinib core gene group
GBP2	NA	NA	NA	-3.29218	NA	-2.75303	-3.90317	-3.13363	-3.46938	-1.82538	NA	NA	NA	-2.36834	NA	NA
GBP4	NA	NA	NA	-4.26171	NA	-4.14298	-4.11149	-4.09977	-4.37482	-2.75069	NA	NA	NA	-2.8833	NA	NA
GJB2	NA	NA	NA	NA	NA	1.40307	1.58191	1.88201	2.21367	1.60845	1.9264	NA	NA	1.19975	NA	NA
GPR1	NA	NA	NA	NA	NA	-2.33153	-1.9999	NA	NA	NA	NA	NA	NA	NA	NA	NA
HCAR2	NA	NA	NA	-2.16577	NA	-1.79689	-2.57415	-2.64196	-2.55976	NA	NA	NA	1.384	-1.61572	NA	-3.03832			Erlotinib core gene group
HCP5	NA	NA	NA	-1.40245	NA	-1.03713	-1.57857	-1.75601	-1.59576	NA	NA	NA	NA	-1.30575	NA	NA			Erlotinib core gene group
HELZ2	NA	NA	NA	-1.09946	NA	-1.17307	NA	NA	NA	NA	NA	NA	NA	NA	NA	NA
HERC6	NA	NA	NA	-1.35061	NA	-1.40923	NA	NA	NA	NA	NA	NA	NA	NA	NA	NA
HEY1	NA	NA	NA	1.86009	NA	1.48881	1.71184	1.70108	3.22126	1.20332	2.96484	NA	NA	1.52827	NA	NA
HGF	NA	NA	NA	NA	NA	-1.81306	-2.35485	-2.4485	-2.6556	NA	NA	NA	NA	NA	NA	NA			Erlotinib core gene group
HKDC1	NA	NA	NA	NA	NA	3.48426	NA	2.62092	NA	NA	NA	NA	NA	NA	NA	NA			Erlotinib core gene group
HLA-B	NA	NA	NA	-1.08584	NA	-1.13918	NA	-1.31101	-1.27672	NA	NA	NA	NA	NA	NA	NA			Erlotinib core gene group
HLA-F	NA	NA	NA	-1.48778	NA	-1.4127	-1.6118	-1.90372	-1.89896	NA	NA	NA	1.12804	NA	NA	NA			Erlotinib core gene group
HSD17B1	NA	NA	NA	NA	NA	1.19418	NA	NA	NA	NA	NA	NA	NA	NA	NA	NA
HSH2D	NA	NA	NA	-2.62709	NA	-2.92898	NA	NA	NA	NA	NA	NA	NA	NA	NA	-3.5922
HSPD1P11	NA	NA	NA	-1.46228	NA	-1.43111	-2.05551	NA	NA	NA	NA	NA	NA	NA	NA	NA
ID3	NA	NA	NA	-1.7257	NA	-1.84433	-2.62103	-2.73702	-2.25741	-1.31818	NA	NA	1.40691	-1.19351	NA	NA
IFI27	NA	NA	NA	-6.08225	NA	-5.79016	-2.87036	-1.42225	-3.7351	NA	NA	NA	NA	NA	NA	-6.92462			Erlotinib core gene group
IFI35	NA	NA	NA	-1.60332	NA	-1.46716	-1.12757	-1.11986	-1.15689	NA	NA	NA	NA	NA	NA	NA			Erlotinib core gene group
IFI44L	NA	NA	NA	-5.635	NA	-4.59859	-3.53582	-2.71183	-3.73021	NA	NA	NA	1.5521	-2.16706	NA	-4.69595			Erlotinib core gene group
IFI6	NA	NA	NA	-4.32713	NA	-3.76936	-1.65577	-1.28313	-1.91315	NA	NA	NA	NA	-1.11227	NA	-3.93399			Erlotinib core gene group
IFIH1	NA	NA	NA	NA	NA	-1.0059	NA	NA	NA	NA	NA	NA	NA	NA	NA	-2.06537
IFIT3	NA	NA	NA	-2.86942	NA	-2.1166	-1.95726	-1.50924	-1.98129	NA	NA	NA	NA	-1.40332	NA	NA			Erlotinib core gene group
IFITM1	NA	NA	NA	-2.27256	NA	-2.36704	-1.43234	NA	-1.29627	NA	NA	NA	NA	NA	NA	-2.31137
IFITM3	NA	NA	NA	-1.28369	NA	-1.27767	NA	NA	NA	NA	NA	NA	NA	NA	NA	NA
IL11	NA	NA	NA	1.87891	NA	1.84694	2.6344	2.13528	NA	NA	NA	NA	NA	NA	NA	NA			Erlotinib core gene group
IL20RA	NA	NA	NA	NA	NA	1.29836	NA	NA	NA	NA	NA	NA	NA	NA	NA	NA
IL6	NA	NA	NA	NA	NA	-3.37951	NA	NA	NA	-3.79655	NA	NA	-3.18126	-2.23471	NA	NA
IRF9	NA	NA	NA	-1.59902	NA	-1.64468	NA	NA	NA	NA	NA	NA	NA	NA	NA	NA
ISG15	NA	NA	NA	-2.61933	NA	-2.28348	NA	NA	NA	NA	NA	NA	NA	NA	NA	NA
JPH2	NA	NA	NA	-2.22858	NA	-3.71307	-2.54192	NA	-2.55316	-2.90604	NA	NA	NA	NA	NA	NA
KDM7A	NA	NA	NA	2.21141	NA	1.61031	NA	NA	NA	NA	NA	NA	NA	1.33081	NA	NA
KIF26B	NA	NA	NA	1.24976	NA	1.60377	1.40599	NA	1.22934	NA	NA	NA	NA	NA	NA	NA
KRT6A	NA	NA	NA	-1.67403	NA	-1.40975	-1.40295	NA	NA	NA	NA	NA	NA	NA	NA	NA
LAMA3	NA	NA	NA	NA	NA	1.03798	1.16818	1.14965	1.09243	1.31071	4.68464	NA	NA	1.24108	NA	-3.59933
LAMB3	NA	NA	NA	1.61199	NA	1.35656	1.27646	1.14749	NA	NA	NA	NA	NA	1.37418	NA	NA			Erlotinib core gene group
LAMP3	NA	NA	NA	NA	NA	-2.65245	-1.33658	-1.40523	-1.83228	-1.77299	NA	NA	NA	NA	NA	NA
LCN2	NA	NA	NA	NA	NA	-2.86772	-2.66551	NA	NA	NA	NA	NA	NA	NA	NA	NA
LGALS9	NA	NA	NA	-2.78426	NA	-5.84073	-4.67688	NA	NA	NA	NA	NA	NA	NA	NA	NA
LINC00525	NA	NA	NA	-4.77495	NA	-2.96601	-2.48043	-3.75945	-3.77971	-2.6004	-3.92012	NA	NA	-4.39165	NA	NA
LINC00885	NA	NA	NA	-3.5554	NA	-2.89286	-2.93356	-2.09392	NA	NA	NA	NA	NA	NA	NA	NA			Erlotinib core gene group
LINC01629	NA	NA	NA	NA	NA	2.50847	NA	NA	NA	NA	NA	NA	NA	NA	NA	NA
LINC02068	NA	NA	NA	NA	NA	-2.31387	-3.36934	-3.01873	-3.12503	NA	NA	NA	NA	NA	NA	NA			Erlotinib core gene group
LINC02298	NA	NA	NA	-2.2646	NA	-2.09956	NA	-2.08723	-2.83018	NA	NA	NA	NA	NA	NA	NA			Erlotinib core gene group
LINC02454	NA	NA	NA	1.98357	NA	2.32118	2.95347	3.96957	5.156	2.41911	4.68057	NA	NA	2.09975	NA	NA
LINC02474	NA	NA	NA	-1.40239	NA	-1.52936	-1.74802	-1.91206	-1.92752	NA	NA	NA	NA	NA	NA	-1.59857			Erlotinib core gene group
LMTK3	NA	NA	NA	NA	NA	-1.43543	NA	NA	NA	NA	NA	NA	NA	NA	NA	NA
LOX	NA	NA	NA	-1.94053	NA	-1.26111	-1.25068	-1.39209	-1.95707	NA	-2.59695	NA	NA	-1.63547	NA	NA			Erlotinib core gene group
LRRC61	NA	NA	NA	-1.43119	NA	-1.11495	-1.0846	NA	NA	NA	NA	NA	NA	NA	NA	NA
LRRC7	NA	NA	NA	NA	NA	-3.2081	-2.72617	NA	NA	-2.67779	NA	NA	-1.36363	NA	NA	NA
LUCAT1	NA	NA	NA	2.4284	NA	2.92816	2.35591	NA	2.07096	1.75155	NA	NA	NA	NA	NA	NA
LYPD5	NA	NA	NA	-2.08247	NA	-2.39173	-2.28323	-1.78996	-2.23349	NA	NA	NA	NA	NA	NA	NA			Erlotinib core gene group
MELTF	NA	NA	NA	-1.17417	NA	-1.29833	NA	NA	NA	NA	NA	NA	NA	NA	NA	NA
MICALL2	NA	NA	NA	-1.41378	NA	-1.10582	-1.07093	NA	-1.20452	NA	NA	NA	NA	NA	NA	NA
MIR3619	NA	NA	NA	NA	NA	-1.87085	NA	NA	NA	NA	NA	NA	NA	NA	NA	NA
MUC1	NA	NA	NA	-2.36051	NA	-2.79385	-2.6497	NA	NA	NA	NA	NA	NA	NA	NA	-3.50782
MUC16	NA	NA	NA	-1.79005	NA	-1.71427	-1.90786	-1.30036	-1.84594	-1.55261	NA	NA	NA	-1.62451	NA	-4.1411
MUC4	NA	NA	NA	-1.73566	NA	-1.9211	-2.12876	-1.91838	-2.38432	-1.30372	NA	NA	NA	-1.11607	NA	-2.21383
MVP	NA	NA	NA	-1.61227	NA	-1.50092	-1.95904	-1.66415	-1.95347	NA	NA	NA	NA	-1.08184	NA	NA			Erlotinib core gene group
MX1	NA	NA	NA	-3.65317	NA	-3.52083	-1.91976	-1.33653	-2.28855	NA	NA	NA	NA	NA	NA	-4.11572			Erlotinib core gene group
MX2	NA	NA	NA	-7.56959	NA	-6.89715	-3.92451	-2.19919	-4.79065	NA	NA	NA	NA	NA	NA	-7.56139			Erlotinib core gene group
MYH15	NA	NA	NA	2.16457	NA	2.24601	NA	3.27285	4.59098	3.5083	5.65882	NA	NA	3.43802	NA	NA
MYLK	NA	NA	NA	-2.98168	NA	-1.79772	-2.67786	-2.28549	-2.34935	-1.11108	-3.36691	NA	1.16818	-2.2919	NA	NA
NECTIN4	NA	NA	NA	NA	NA	-1.49279	-2.09846	-1.80283	-1.80605	NA	NA	NA	NA	NA	NA	NA			Erlotinib core gene group
NEXN	NA	NA	NA	-2.47051	NA	-2.085	-2.25364	-2.16429	-2.57107	-1.49605	-1.42172	NA	NA	-1.88136	NA	NA
NMNAT2	NA	NA	NA	NA	NA	-2.17308	-2.36792	-1.91704	-2.12499	NA	NA	NA	NA	NA	NA	NA			Erlotinib core gene group
NOP14-AS1	NA	NA	NA	1.22558	NA	1.015	NA	NA	NA	NA	NA	NA	NA	1.00554	NA	NA
NTF4	NA	NA	NA	-2.58749	NA	-2.28933	-2.15065	-1.9269	-2.51052	NA	NA	NA	NA	NA	NA	NA			Erlotinib core gene group
OAS1	NA	NA	NA	-3.72231	NA	-3.00354	-2.0663	-1.68964	-2.1325	NA	NA	NA	NA	-1.50206	NA	-3.41171			Erlotinib core gene group
OAS2	NA	NA	NA	-3.96275	NA	-3.37852	-2.20408	-1.56376	-2.1649	NA	NA	NA	1.14603	NA	NA	-3.78003			Erlotinib core gene group
OAS3	NA	NA	NA	-1.23377	NA	-1.07222	NA	NA	NA	NA	NA	NA	NA	NA	NA	NA
OASL	NA	NA	NA	-3.57289	NA	-2.46622	-2.3764	NA	-1.76251	NA	NA	NA	NA	NA	NA	NA
OSBPL6	NA	NA	NA	NA	NA	1.02338	1.09644	NA	NA	NA	NA	NA	NA	NA	NA	NA
OTUB2	NA	NA	NA	NA	NA	1.679	1.35259	1.93789	1.75757	2.09773	2.91958	NA	NA	1.59778	NA	NA
P2RY6	NA	NA	NA	-2.71529	NA	-2.35686	NA	NA	NA	NA	NA	NA	NA	NA	NA	NA
PALLD	NA	NA	NA	NA	NA	-1.05814	NA	NA	NA	-1.05762	NA	NA	NA	NA	NA	NA
PAQR5	NA	NA	NA	1.15683	NA	1.13516	1.13667	1.50359	1.71763	1.29051	2.07856	NA	NA	1.32256	NA	NA
PARP10	NA	NA	NA	-1.08664	NA	-1.25791	-1.12028	NA	NA	NA	NA	NA	NA	NA	NA	-1.79159
PARP9	NA	NA	NA	-1.20434	NA	-1.14444	NA	NA	-1.05882	NA	NA	NA	NA	NA	NA	NA
PCDH7	NA	NA	NA	-2.79282	NA	-2.0956	-3.46894	-2.75586	-2.48637	NA	NA	NA	2.24624	-1.20237	NA	NA			Erlotinib core gene group
PCED1B-AS1	NA	NA	NA	-2.60465	NA	-2.9728	NA	NA	NA	NA	NA	NA	NA	NA	NA	NA
PCSK9	NA	NA	NA	-2.08581	NA	-2.06568	-1.69433	-2.09435	NA	-1.59071	NA	NA	NA	-1.6091	NA	NA
PGM2L1	NA	NA	NA	NA	NA	-1.06163	-1.44091	-1.29961	-1.54834	NA	NA	NA	NA	NA	NA	NA			Erlotinib core gene group
PLK3	NA	NA	NA	1.44565	NA	1.18677	1.44578	1.27964	1.31164	1.14975	1.91092	NA	NA	1.41375	NA	NA
PRSS22	NA	NA	NA	1.60486	NA	2.18826	2.17955	2.29068	1.68488	2.54141	2.99171	NA	NA	NA	NA	NA
PSMB10	NA	NA	NA	-1.63075	NA	-1.86027	-2.21343	-2.25671	-2.29777	-1.25786	NA	NA	NA	-1.0395	NA	NA
PSMB9	NA	NA	NA	-1.37674	NA	-1.15495	-1.29786	-1.49677	-1.38939	NA	NA	NA	NA	-1.03173	NA	NA			Erlotinib core gene group
PTHLH	NA	NA	NA	NA	NA	1.43018	NA	NA	NA	1.22195	NA	NA	NA	NA	1.0257	NA
REC8	NA	NA	NA	-1.74327	NA	-1.95216	NA	NA	NA	NA	NA	NA	NA	NA	NA	-2.38637
RHOBTB3	NA	NA	NA	-1.02198	NA	-1.06951	-1.37992	-1.36784	-1.08946	NA	NA	NA	NA	NA	NA	NA			Erlotinib core gene group
RNF24	NA	NA	NA	NA	NA	1.02581	NA	NA	NA	NA	NA	NA	NA	NA	NA	NA
RSAD2	NA	NA	NA	-4.86541	NA	-3.15076	NA	NA	NA	NA	NA	NA	NA	NA	NA	NA
RTP4	NA	NA	NA	-3.93651	NA	-4.48534	-4.40685	-4.54041	-4.77248	-3.1224	NA	NA	NA	-2.57196	NA	-5.63638
RUBCNL	NA	NA	NA	NA	NA	-2.85934	NA	NA	NA	NA	NA	NA	NA	NA	NA	NA
SAA2	NA	NA	NA	-2.35793	NA	-4.02372	NA	NA	NA	-2.98466	NA	NA	-3.44153	NA	NA	NA
SAMD9L	NA	NA	NA	-2.06452	NA	-1.65235	-2.28782	-2.42448	-2.47808	-1.19404	NA	NA	1.22196	-1.59931	NA	-3.28065
SCNN1A	NA	NA	NA	-3.15171	NA	-2.66045	-3.0287	NA	-2.46235	NA	NA	NA	NA	NA	NA	NA
SELENOW	NA	NA	NA	NA	NA	-1.05956	NA	NA	NA	NA	NA	NA	NA	NA	NA	NA
SERPINE1	NA	NA	NA	1.66591	NA	1.8098	2.62485	2.08303	1.69521	NA	NA	NA	NA	NA	NA	NA			Erlotinib core gene group
SH3TC1	NA	NA	NA	NA	NA	1.28498	1.55424	3.65619	2.45669	2.4145	2.68327	NA	NA	1.89985	NA	NA
SLC20A1	NA	NA	NA	NA	NA	1.06282	1.29675	1.30243	1.50916	1.01732	1.34026	NA	NA	NA	NA	NA
SLC25A23	NA	NA	NA	NA	NA	-1.06161	NA	NA	NA	NA	NA	NA	NA	NA	NA	NA
SLC7A11	NA	NA	NA	1.5456	NA	1.25432	NA	NA	NA	NA	NA	NA	NA	NA	NA	NA
SPOCK2	NA	NA	NA	NA	NA	-1.69572	NA	NA	-1.71912	NA	NA	NA	NA	NA	NA	NA
STARD5	NA	NA	NA	-1.55643	NA	-1.24472	-1.33311	-1.13586	-1.26979	NA	NA	NA	NA	-1.15294	NA	NA			Erlotinib core gene group
SYT7	NA	NA	NA	1.30679	NA	1.30609	NA	NA	NA	NA	NA	NA	NA	NA	NA	NA
SYT8	NA	NA	NA	-3.45117	NA	-2.21859	-2.8996	-2.71826	-2.77422	NA	-3.1069	NA	NA	-2.4737	NA	NA			Erlotinib core gene group
TAGLN	NA	NA	NA	NA	NA	-2.75583	NA	NA	NA	NA	NA	NA	NA	NA	NA	NA
TAPBPL	NA	NA	NA	-1.20951	NA	-1.195	-1.29895	-1.19108	-1.243	NA	NA	NA	NA	NA	NA	NA			Erlotinib core gene group
TGFB2	NA	NA	NA	NA	NA	-2.77912	NA	NA	NA	NA	NA	NA	NA	NA	NA	NA
TGFBR3	NA	NA	NA	NA	NA	1.10067	NA	1.11928	1.14848	NA	NA	NA	NA	NA	NA	NA			Erlotinib core gene group
THEM6	NA	NA	NA	-1.56486	NA	-1.39728	-1.35054	NA	NA	NA	NA	NA	NA	NA	NA	NA
TMEM229B	NA	NA	NA	NA	NA	-1.27138	-1.32727	-1.12755	-1.29365	NA	NA	NA	NA	NA	NA	NA			Erlotinib core gene group
TMEM255A	NA	NA	NA	-2.32755	NA	-1.60795	-2.1015	-2.48031	-2.36881	-1.88435	-4.13546	NA	NA	-2.59917	NA	NA
TNS4	NA	NA	NA	1.15547	NA	1.23328	NA	1.51943	NA	2.65467	2.79362	NA	1.11182	2.58018	NA	NA
TRIB1	NA	NA	NA	1.32513	NA	1.35348	1.29018	NA	NA	1.09864	NA	NA	NA	1.07055	NA	NA
TRIM22	NA	NA	NA	-6.40423	NA	-6.02698	-5.40025	-4.45212	-5.35187	NA	NA	NA	NA	NA	NA	-7.02902			Erlotinib core gene group
TRIM29	NA	NA	NA	-1.18395	NA	-1.12336	-1.01081	NA	NA	NA	NA	NA	NA	NA	NA	NA
TRIM6	NA	NA	NA	-1.44692	NA	-1.01735	-1.10034	-1.29114	-1.37494	NA	NA	NA	NA	-1.40717	NA	NA			Erlotinib core gene group
TRIML2	NA	NA	NA	1.34521	NA	2.10607	1.6392	1.6398	NA	2.10284	NA	NA	NA	1.34641	NA	NA
TSPAN15	NA	NA	NA	-1.36196	NA	-1.2035	-1.15835	NA	NA	NA	NA	NA	NA	NA	NA	NA
UBE2L6	NA	NA	NA	-1.22479	NA	-1.13035	NA	-1.01852	NA	NA	NA	NA	NA	NA	NA	NA			Erlotinib core gene group
USP18	NA	NA	NA	-1.2337	NA	-1.18263	NA	NA	NA	NA	NA	NA	NA	NA	NA	NA
VTRNA1-3	NA	NA	NA	NA	NA	2.00407	NA	1.5147	NA	NA	NA	NA	NA	NA	NA	NA			Erlotinib core gene group
VWA1	NA	NA	NA	-1.35758	NA	-1.26913	-1.54075	NA	NA	NA	NA	NA	NA	NA	NA	NA
WFDC2	NA	NA	NA	NA	NA	-1.42139	-1.2018	-1.02468	-1.32858	NA	NA	NA	NA	NA	NA	NA			Erlotinib core gene group
WNT7B	NA	NA	NA	1.76976	NA	1.90235	1.35976	1.23394	NA	NA	NA	NA	NA	NA	NA	NA			Erlotinib core gene group
XAF1	NA	NA	NA	-3.54527	NA	-3.61728	-2.92559	-2.44144	-2.98706	-1.25456	NA	NA	NA	NA	NA	-4.54015
ZBED6CL	NA	NA	NA	-1.3586	NA	-1.41586	-1.29059	NA	NA	NA	NA	NA	NA	NA	NA	NA
ZNF165	NA	NA	NA	1.07216	NA	1.11511	1.18172	NA	NA	NA	NA	NA	NA	NA	NA	NA
ZNF488	NA	NA	NA	-2.77102	NA	-2.19681	-2.53075	-1.55488	NA	NA	NA	NA	NA	-1.62779	NA	NA			Erlotinib core gene group
ZNF703	NA	NA	NA	-1.10746	NA	-1.07373	NA	NA	NA	NA	NA	NA	NA	NA	NA	NA
ACSF2	NA	NA	NA	-1.0711	NA	NA	NA	NA	-1.05963	NA	-1.02285	NA	NA	NA	NA	NA
AKAP12	NA	NA	NA	1.16977	NA	NA	NA	1.50412	NA	1.38375	4.2957	NA	NA	1.80987	NA	-3.62083
ALDH1A2	NA	NA	NA	-1.94837	NA	NA	NA	NA	NA	NA	NA	NA	NA	NA	NA	NA
ALDH3B1	NA	NA	NA	-1.02593	NA	NA	-1.267	-1.08876	-1.24037	NA	-1.70954	NA	NA	NA	NA	NA		Cetuximab core Gene Group	Erlotinib core gene group
ARHGEF19	NA	NA	NA	-1.14745	NA	NA	NA	NA	NA	NA	NA	NA	NA	NA	NA	NA
BISPR	NA	NA	NA	-1.2415	NA	NA	NA	NA	NA	NA	NA	NA	NA	NA	NA	NA
BSPRY	NA	NA	NA	1.32185	NA	NA	NA	1.22339	NA	NA	NA	NA	NA	NA	NA	NA			Erlotinib core gene group
BST2	NA	NA	NA	-1.24181	NA	NA	NA	NA	NA	NA	NA	NA	NA	NA	NA	NA
BTBD19	NA	NA	NA	1.62718	NA	NA	NA	1.77102	NA	2.1827	NA	NA	NA	2.39083	NA	NA
C10orf55	NA	NA	NA	2.22198	NA	NA	1.95715	1.58945	2.19094	NA	3.70537	NA	NA	NA	NA	NA		Cetuximab core Gene Group	Erlotinib core gene group
C11orf44	NA	NA	NA	-2.79393	NA	NA	-2.2086	NA	NA	NA	NA	NA	NA	NA	NA	NA		Cetuximab core Gene Group
CACNB3	NA	NA	NA	-1.03498	NA	NA	-1.09387	NA	-1.03523	NA	NA	NA	NA	NA	NA	NA		Cetuximab core Gene Group
CAMK2A	NA	NA	NA	-1.93993	NA	NA	-1.42424	NA	-1.68067	NA	-2.38635	NA	NA	NA	NA	NA		Cetuximab core Gene Group
CARD6	NA	NA	NA	-1.03037	NA	NA	-1.45386	-1.55817	-1.36938	NA	NA	NA	NA	-1.01702	NA	NA		Cetuximab core Gene Group	Erlotinib core gene group
CASP1	NA	NA	NA	-1.06304	NA	NA	NA	-1.2016	-1.10751	NA	NA	NA	NA	-1.0263	NA	NA			Erlotinib core gene group
CASP1P2	NA	NA	NA	-4.59398	NA	NA	-2.96789	-3.05753	NA	NA	NA	NA	NA	NA	NA	NA		Cetuximab core Gene Group	Erlotinib core gene group
CCDC74A	NA	NA	NA	-2.46954	NA	NA	NA	NA	NA	NA	NA	NA	NA	NA	NA	NA
CD274	NA	NA	NA	1.27656	NA	NA	NA	NA	NA	NA	NA	NA	NA	1.35312	NA	NA
CDKN1A	NA	NA	NA	1.45732	NA	NA	NA	NA	NA	NA	NA	NA	NA	NA	NA	NA
CEMIP	NA	NA	NA	-1.7546	NA	NA	-1.27364	NA	NA	NA	NA	NA	NA	NA	1.43947	NA		Cetuximab core Gene Group
CFH	NA	NA	NA	-1.42944	NA	NA	-1.50533	-1.4982	NA	NA	NA	NA	1.35757	NA	NA	NA		Cetuximab core Gene Group	Erlotinib core gene group
CPA4	NA	NA	NA	-1.21096	NA	NA	NA	1.18224	1.68594	NA	2.44249	NA	NA	NA	NA	NA			Erlotinib core gene group
CSPG4	NA	NA	NA	-3.23568	NA	NA	-3.57141	NA	NA	NA	NA	NA	NA	NA	NA	NA		Cetuximab core Gene Group
CXCL16	NA	NA	NA	-1.38177	NA	NA	NA	-1.5878	-1.69265	NA	NA	NA	NA	-1.60526	NA	NA			Erlotinib core gene group
CXCL2	NA	NA	NA	1.75025	NA	NA	NA	1.90274	NA	NA	NA	NA	NA	1.46908	NA	NA			Erlotinib core gene group
DHRS1	NA	NA	NA	-1.04724	NA	NA	-1.04601	NA	NA	NA	NA	NA	NA	NA	NA	NA		Cetuximab core Gene Group
DLGAP1-AS2	NA	NA	NA	1.21852	NA	NA	NA	NA	NA	NA	NA	NA	NA	NA	NA	NA
DNAH3	NA	NA	NA	-1.89787	NA	NA	-1.84954	-1.99557	NA	NA	NA	NA	NA	NA	NA	NA		Cetuximab core Gene Group	Erlotinib core gene group
DNM3	NA	NA	NA	-1.10632	NA	NA	-1.10787	NA	-1.14665	NA	-1.42287	NA	NA	NA	NA	NA		Cetuximab core Gene Group
DOC2A	NA	NA	NA	-1.72383	NA	NA	-1.9234	NA	-1.91297	NA	-1.70701	NA	NA	NA	NA	NA		Cetuximab core Gene Group
DZIP3	NA	NA	NA	-1.0393	NA	NA	-1.03144	NA	-1.33269	NA	NA	NA	NA	NA	NA	NA		Cetuximab core Gene Group
E2F2	NA	NA	NA	-1.27729	NA	NA	NA	NA	NA	NA	NA	NA	NA	NA	NA	NA
EGLN3	NA	NA	NA	-1.43042	NA	NA	-1.13696	-1.10559	NA	NA	NA	NA	NA	NA	NA	NA		Cetuximab core Gene Group	Erlotinib core gene group
EML5	NA	NA	NA	1.08912	NA	NA	NA	NA	NA	NA	NA	NA	NA	NA	NA	NA
EPN3	NA	NA	NA	-1.38071	NA	NA	NA	NA	NA	NA	NA	NA	NA	NA	NA	NA
EYA1	NA	NA	NA	-1.26738	NA	NA	-1.50526	-1.42095	-1.31451	NA	NA	NA	NA	NA	NA	NA		Cetuximab core Gene Group	Erlotinib core gene group
FAM20C	NA	NA	NA	-1.02588	NA	NA	NA	NA	NA	NA	NA	NA	NA	NA	NA	NA
FAM212A	NA	NA	NA	-1.47831	NA	NA	NA	NA	NA	NA	NA	NA	NA	NA	NA	NA
FAT2	NA	NA	NA	-1.64036	NA	NA	-1.32077	-1.53982	-1.24025	NA	NA	NA	NA	-1.29429	NA	NA		Cetuximab core Gene Group	Erlotinib core gene group
FOXA1	NA	NA	NA	-1.04002	NA	NA	-1.85724	-1.08366	-1.34693	NA	NA	NA	NA	NA	NA	NA		Cetuximab core Gene Group	Erlotinib core gene group
FUT1	NA	NA	NA	1.1226	NA	NA	NA	1.03972	NA	NA	NA	NA	NA	1.09062	NA	NA			Erlotinib core gene group
GAS6-AS2	NA	NA	NA	1.41521	NA	NA	NA	NA	1.71626	NA	1.78394	NA	NA	NA	NA	NA
GFPT2	NA	NA	NA	4.56317	NA	NA	NA	4.09722	NA	NA	NA	NA	NA	NA	NA	NA			Erlotinib core gene group
GLRB	NA	NA	NA	1.65836	NA	NA	NA	NA	NA	NA	NA	NA	NA	NA	NA	NA
GNAL	NA	NA	NA	-1.54035	NA	NA	NA	-1.5823	NA	NA	NA	NA	NA	-1.77641	NA	NA			Erlotinib core gene group
GPX7	NA	NA	NA	-1.29307	NA	NA	-1.35828	-1.17045	NA	NA	NA	NA	NA	NA	NA	NA		Cetuximab core Gene Group	Erlotinib core gene group
HEXIM2	NA	NA	NA	-1.36059	NA	NA	-1.26381	NA	NA	NA	NA	NA	NA	NA	NA	NA		Cetuximab core Gene Group
HOXA-AS2	NA	NA	NA	-1.52694	NA	NA	-1.3219	NA	-1.38237	NA	NA	NA	NA	NA	NA	NA		Cetuximab core Gene Group
IDUA	NA	NA	NA	-1.43253	NA	NA	-1.22557	-1.02382	-1.34352	NA	NA	NA	NA	NA	NA	NA		Cetuximab core Gene Group	Erlotinib core gene group
IRS2	NA	NA	NA	1.05165	NA	NA	NA	NA	NA	NA	NA	NA	NA	NA	NA	NA
JAG2	NA	NA	NA	-1.21141	NA	NA	NA	-1.20854	-1.00785	NA	NA	NA	NA	NA	NA	NA			Erlotinib core gene group
KLF4	NA	NA	NA	1.26623	NA	NA	NA	NA	NA	NA	NA	NA	NA	1.07984	NA	NA
KLHDC8B	NA	NA	NA	-1.4903	NA	NA	-1.27366	-1.18317	-1.09187	NA	NA	NA	NA	NA	NA	NA		Cetuximab core Gene Group	Erlotinib core gene group
KLK6	NA	NA	NA	-1.43352	NA	NA	NA	NA	NA	NA	NA	NA	NA	NA	1.51258	NA
LIMCH1	NA	NA	NA	-2.23372	NA	NA	-2.033	-2.08023	NA	-1.84572	NA	NA	NA	-2.71371	NA	NA		Cetuximab core Gene Group
LINC00662	NA	NA	NA	1.27613	NA	NA	NA	NA	NA	NA	NA	NA	NA	NA	NA	NA
LINC00898	NA	NA	NA	-1.6541	NA	NA	-1.97357	-1.71797	-2.30649	NA	-2.78849	NA	NA	NA	NA	NA		Cetuximab core Gene Group	Erlotinib core gene group
LINC01843	NA	NA	NA	-1.92244	NA	NA	-1.73416	NA	NA	NA	NA	NA	NA	NA	NA	NA		Cetuximab core Gene Group
LINC02026	NA	NA	NA	-1.8471	NA	NA	-1.97603	-1.60611	-2.42247	NA	-2.2039	NA	NA	-2.04996	NA	NA		Cetuximab core Gene Group	Erlotinib core gene group
LOXL2	NA	NA	NA	-1.17138	NA	NA	NA	NA	NA	NA	NA	NA	NA	NA	NA	NA
LRRC8B	NA	NA	NA	1.16059	NA	NA	NA	NA	1.22275	NA	1.81052	NA	NA	NA	NA	NA
LURAP1L-AS1	NA	NA	NA	2.20997	NA	NA	NA	3.25115	NA	NA	NA	NA	NA	NA	NA	NA			Erlotinib core gene group
MAP1LC3B	NA	NA	NA	1.03463	NA	NA	NA	NA	NA	NA	NA	NA	NA	NA	NA	NA
MPP2	NA	NA	NA	-1.02723	NA	NA	-1.2995	NA	-1.42705	NA	-1.04953	NA	NA	NA	NA	NA		Cetuximab core Gene Group
MTHFR	NA	NA	NA	-1.05188	NA	NA	-1.20965	NA	-1.34959	NA	NA	NA	NA	NA	NA	NA		Cetuximab core Gene Group
MXD1	NA	NA	NA	1.14384	NA	NA	NA	NA	NA	NA	NA	NA	NA	1.07016	NA	NA
MYH11	NA	NA	NA	4.48743	NA	NA	NA	NA	NA	NA	NA	NA	NA	NA	NA	NA
MYOSLID	NA	NA	NA	1.08141	NA	NA	NA	NA	NA	NA	NA	NA	NA	NA	NA	NA
NECAB3	NA	NA	NA	-1.03833	NA	NA	NA	NA	NA	NA	-1.07099	NA	NA	NA	NA	NA
NMU	NA	NA	NA	-1.03989	NA	NA	NA	NA	NA	NA	NA	NA	NA	NA	NA	NA
OSBPL7	NA	NA	NA	-1.38699	NA	NA	-1.3744	NA	-1.68926	NA	NA	NA	NA	NA	NA	NA		Cetuximab core Gene Group
P2RX6	NA	NA	NA	-1.67752	NA	NA	NA	NA	NA	NA	NA	NA	NA	NA	NA	NA
PCNPP3	NA	NA	NA	4.16249	NA	NA	NA	5.56039	NA	4.82156	4.74299	NA	NA	5.49079	NA	NA
PDE10A	NA	NA	NA	2.40473	NA	NA	3.66507	6.45651	6.6088	2.11266	6.23891	NA	NA	2.67648	NA	NA		Cetuximab core Gene Group
PDZD2	NA	NA	NA	-1.31089	NA	NA	-1.11535	NA	NA	NA	NA	NA	NA	NA	NA	NA		Cetuximab core Gene Group
PDZK1	NA	NA	NA	-2.29006	NA	NA	-1.54249	NA	NA	NA	NA	NA	NA	-1.6803	NA	NA		Cetuximab core Gene Group
PHLDA2	NA	NA	NA	1.22021	NA	NA	NA	1.43328	1.94605	1.43296	2.94095	NA	NA	1.69965	NA	NA
PPFIA4	NA	NA	NA	-2.3597	NA	NA	NA	NA	NA	NA	NA	NA	NA	NA	NA	NA
PPP1R15A	NA	NA	NA	1.9547	NA	NA	NA	NA	NA	NA	NA	NA	NA	1.74305	NA	NA
PROM2	NA	NA	NA	-1.37061	NA	NA	NA	NA	NA	NA	NA	NA	NA	NA	NA	NA
PRSS23	NA	NA	NA	-1.23792	NA	NA	-1.19897	NA	NA	NA	NA	NA	NA	NA	NA	NA		Cetuximab core Gene Group
PSMB8-AS1	NA	NA	NA	-1.2212	NA	NA	-1.73246	-1.86283	-2.02795	NA	NA	NA	NA	-1.19842	NA	NA		Cetuximab core Gene Group	Erlotinib core gene group
PTGES	NA	NA	NA	-1.52287	NA	NA	NA	NA	NA	NA	NA	NA	NA	NA	NA	NA
RAB11B-AS1	NA	NA	NA	1.40731	NA	NA	NA	1.26034	NA	NA	NA	NA	NA	1.91461	NA	NA			Erlotinib core gene group
RAB39B	NA	NA	NA	3.63305	NA	NA	NA	NA	NA	NA	NA	NA	NA	NA	NA	NA
RAP1GAP	NA	NA	NA	1.07134	NA	NA	NA	NA	NA	NA	NA	NA	NA	NA	NA	NA
RGS16	NA	NA	NA	-1.05374	NA	NA	NA	NA	NA	NA	NA	NA	NA	NA	NA	NA
RIMS3	NA	NA	NA	-1.34296	NA	NA	-1.09587	NA	NA	NA	NA	NA	NA	NA	NA	NA		Cetuximab core Gene Group
RNASE7	NA	NA	NA	1.07462	NA	NA	NA	NA	NA	NA	NA	NA	NA	1.1166	NA	NA
RNF125	NA	NA	NA	1.19796	NA	NA	NA	NA	NA	NA	NA	NA	NA	NA	NA	NA
RPLP0P2	NA	NA	NA	4.07897	NA	NA	NA	3.10988	NA	NA	NA	NA	NA	NA	NA	NA			Erlotinib core gene group
S1PR5	NA	NA	NA	-1.19727	NA	NA	NA	NA	NA	NA	NA	NA	NA	NA	NA	NA
SLC25A35	NA	NA	NA	-1.59753	NA	NA	-1.39082	NA	NA	NA	NA	NA	NA	NA	NA	NA		Cetuximab core Gene Group
SLC43A1	NA	NA	NA	1.5671	NA	NA	NA	1.67812	NA	NA	NA	NA	NA	NA	NA	NA			Erlotinib core gene group
SPRY4-AS1	NA	NA	NA	3.38399	NA	NA	NA	6.29422	5.47901	3.54052	6.30662	NA	NA	4.08937	NA	NA
ST5	NA	NA	NA	-1.0767	NA	NA	NA	NA	NA	NA	NA	NA	NA	NA	NA	NA
STAT4	NA	NA	NA	-2.03479	NA	NA	-1.67243	-1.58056	-2.21148	NA	-1.94798	NA	NA	-2.06943	NA	NA		Cetuximab core Gene Group	Erlotinib core gene group
SYT12	NA	NA	NA	-2.69676	NA	NA	NA	NA	NA	NA	NA	NA	NA	NA	NA	NA
SYTL1	NA	NA	NA	-1.03283	NA	NA	-1.50408	-1.22063	-1.37052	NA	-1.57446	NA	NA	NA	NA	NA		Cetuximab core Gene Group	Erlotinib core gene group
TGFBI	NA	NA	NA	-1.09877	NA	NA	NA	NA	NA	NA	-1.49242	NA	NA	-1.08776	NA	NA
TGM1	NA	NA	NA	-1.65056	NA	NA	NA	NA	NA	NA	NA	NA	NA	NA	NA	NA
TUBE1	NA	NA	NA	1.07824	NA	NA	1.1255	NA	NA	NA	NA	NA	NA	NA	NA	NA		Cetuximab core Gene Group
TYMP	NA	NA	NA	-1.28721	NA	NA	NA	NA	NA	NA	NA	NA	NA	NA	NA	NA
ZFP69B	NA	NA	NA	1.21157	NA	NA	1.33631	1.42954	NA	NA	NA	NA	NA	1.26814	NA	NA		Cetuximab core Gene Group	Erlotinib core gene group
ZNF385A	NA	NA	NA	-1.03669	NA	NA	-1.01525	NA	NA	NA	NA	NA	NA	NA	NA	NA		Cetuximab core Gene Group
ZNF658B	NA	NA	NA	-2.01473	NA	NA	NA	NA	NA	NA	NA	NA	NA	NA	NA	NA
ABCC3	NA	NA	NA	NA	NA	NA	1.02519	NA	NA	NA	NA	NA	NA	NA	NA	NA		Cetuximab core Gene Group
ACRBP	NA	NA	NA	NA	NA	NA	-2.68412	NA	NA	NA	NA	NA	NA	NA	NA	NA		Cetuximab core Gene Group
ACTG1P1	NA	NA	NA	NA	NA	NA	-2.49157	-2.57456	NA	NA	NA	NA	NA	NA	NA	NA		Cetuximab core Gene Group	Erlotinib core gene group
ACY3	NA	NA	NA	NA	NA	NA	-2.63729	-2.10061	NA	NA	NA	NA	NA	NA	NA	NA		Cetuximab core Gene Group	Erlotinib core gene group
ADGRF4	NA	NA	NA	NA	NA	NA	1.43461	2.44586	2.17788	1.01438	2.126	NA	-1.46135	1.09115	NA	NA		Cetuximab core Gene Group
ADGRF5P1	NA	NA	NA	NA	NA	NA	-2.27507	NA	NA	NA	NA	NA	NA	NA	NA	NA		Cetuximab core Gene Group
ADGRL3	NA	NA	NA	NA	NA	NA	-1.29066	-1.71417	-2.21993	NA	-2.27304	NA	NA	NA	NA	NA		Cetuximab core Gene Group	Erlotinib core gene group
ADH1C	NA	NA	NA	NA	NA	NA	-3.67434	NA	NA	NA	NA	NA	NA	NA	NA	NA		Cetuximab core Gene Group
ADM5	NA	NA	NA	NA	NA	NA	1.30167	1.58845	1.18148	NA	NA	NA	NA	NA	NA	NA		Cetuximab core Gene Group	Erlotinib core gene group
AFAP1	NA	NA	NA	NA	NA	NA	-1.02418	NA	-1.03013	NA	NA	NA	NA	NA	NA	NA		Cetuximab core Gene Group
AGBL2	NA	NA	NA	NA	NA	NA	-1.01611	NA	-1.16617	NA	NA	NA	NA	NA	NA	NA		Cetuximab core Gene Group
AGPAT4	NA	NA	NA	NA	NA	NA	-1.16477	NA	-1.16476	NA	NA	NA	NA	NA	NA	NA		Cetuximab core Gene Group
AKR1B15	NA	NA	NA	NA	NA	NA	-3.85752	NA	NA	NA	NA	NA	NA	NA	NA	NA		Cetuximab core Gene Group
ALDH1L2	NA	NA	NA	NA	NA	NA	1.56938	NA	NA	NA	NA	NA	NA	NA	NA	NA		Cetuximab core Gene Group
ALPK1	NA	NA	NA	NA	NA	NA	-1.19378	-1.08519	-1.24665	NA	NA	NA	NA	NA	NA	NA		Cetuximab core Gene Group	Erlotinib core gene group
ALS2CL	NA	NA	NA	NA	NA	NA	-1.04567	NA	-1.20368	NA	NA	NA	NA	NA	NA	NA		Cetuximab core Gene Group
ANKRD22	NA	NA	NA	NA	NA	NA	2.81159	4.9369	6.36034	NA	7.72018	NA	NA	NA	NA	NA		Cetuximab core Gene Group	Erlotinib core gene group
ANKRD34A	NA	NA	NA	NA	NA	NA	-1.10338	NA	NA	NA	NA	NA	NA	NA	NA	NA		Cetuximab core Gene Group
ANKRD37	NA	NA	NA	NA	NA	NA	-1.31771	-1.71972	-1.48881	NA	NA	NA	2.08159	NA	NA	NA		Cetuximab core Gene Group	Erlotinib core gene group
ANO8	NA	NA	NA	NA	NA	NA	-1.46606	NA	-1.31994	NA	NA	NA	NA	NA	NA	NA		Cetuximab core Gene Group
APOBR	NA	NA	NA	NA	NA	NA	-2.46463	NA	NA	NA	NA	NA	NA	NA	NA	NA		Cetuximab core Gene Group
AQP10	NA	NA	NA	NA	NA	NA	-3.21901	NA	NA	NA	NA	NA	NA	NA	NA	NA		Cetuximab core Gene Group
ARHGAP4	NA	NA	NA	NA	NA	NA	-2.72685	NA	NA	NA	NA	NA	NA	NA	NA	NA		Cetuximab core Gene Group
ARL6IP5	NA	NA	NA	NA	NA	NA	-1.18798	-1.22931	NA	NA	NA	NA	NA	NA	NA	NA		Cetuximab core Gene Group	Erlotinib core gene group
ATL1	NA	NA	NA	NA	NA	NA	-2.21626	-2.17251	-2.10445	NA	-2.99334	NA	NA	-1.71738	NA	NA		Cetuximab core Gene Group	Erlotinib core gene group
AVIL	NA	NA	NA	NA	NA	NA	-1.35334	NA	-1.6341	NA	NA	NA	NA	NA	NA	NA		Cetuximab core Gene Group
AZIN2	NA	NA	NA	NA	NA	NA	-1.26482	NA	NA	NA	NA	NA	NA	NA	NA	NA		Cetuximab core Gene Group
BANK1	NA	NA	NA	NA	NA	NA	-2.34879	-2.16486	-2.51796	NA	NA	NA	NA	NA	NA	NA		Cetuximab core Gene Group	Erlotinib core gene group
BCHE	NA	NA	NA	NA	NA	NA	-2.41847	-2.0066	-2.35684	NA	NA	NA	NA	NA	NA	NA		Cetuximab core Gene Group	Erlotinib core gene group
BCL11B	NA	NA	NA	NA	NA	NA	-2.6674	-2.6716	-2.26965	NA	-3.36162	NA	NA	NA	NA	NA		Cetuximab core Gene Group	Erlotinib core gene group
BCL2L14	NA	NA	NA	NA	NA	NA	-4.41474	NA	NA	NA	NA	NA	NA	NA	NA	NA		Cetuximab core Gene Group
BCO2	NA	NA	NA	NA	NA	NA	-1.43755	NA	NA	NA	NA	NA	NA	NA	NA	NA		Cetuximab core Gene Group
BEGAIN	NA	NA	NA	NA	NA	NA	2.53232	1.9919	2.7544	NA	NA	NA	NA	NA	NA	NA		Cetuximab core Gene Group	Erlotinib core gene group
BEND3	NA	NA	NA	NA	NA	NA	1.03189	1.01907	1.30781	NA	NA	NA	NA	NA	NA	NA		Cetuximab core Gene Group	Erlotinib core gene group
BHMT	NA	NA	NA	NA	NA	NA	-2.41146	-2.10434	NA	NA	NA	NA	NA	NA	NA	NA		Cetuximab core Gene Group	Erlotinib core gene group
BLID	NA	NA	NA	NA	NA	NA	2.61821	3.53449	NA	2.62145	NA	NA	NA	3.41398	NA	NA		Cetuximab core Gene Group
BMS1P10	NA	NA	NA	NA	NA	NA	-1.36108	NA	NA	NA	NA	NA	NA	NA	NA	NA		Cetuximab core Gene Group
BNIP3L	NA	NA	NA	NA	NA	NA	-1.02411	-1.34457	-1.19727	NA	NA	NA	NA	NA	NA	NA		Cetuximab core Gene Group	Erlotinib core gene group
BTBD16	NA	NA	NA	NA	NA	NA	-1.9098	NA	NA	NA	NA	NA	NA	NA	NA	NA		Cetuximab core Gene Group
BTN2A2	NA	NA	NA	NA	NA	NA	-1.01477	NA	NA	NA	NA	NA	NA	NA	NA	NA		Cetuximab core Gene Group
C17orf113	NA	NA	NA	NA	NA	NA	-1.27786	-1.24613	-1.52348	NA	NA	NA	NA	NA	NA	NA		Cetuximab core Gene Group	Erlotinib core gene group
C1orf228	NA	NA	NA	NA	NA	NA	-2.88368	-2.35436	NA	NA	NA	NA	NA	NA	NA	NA		Cetuximab core Gene Group	Erlotinib core gene group
C1QTNF6	NA	NA	NA	NA	NA	NA	-1.00791	NA	NA	NA	NA	NA	NA	NA	NA	NA		Cetuximab core Gene Group
C2orf70	NA	NA	NA	NA	NA	NA	1.47957	2.19248	1.53549	1.28864	NA	NA	NA	1.18657	NA	NA		Cetuximab core Gene Group
C3orf18	NA	NA	NA	NA	NA	NA	-1.14135	NA	NA	NA	NA	NA	NA	NA	NA	NA		Cetuximab core Gene Group
C5orf56	NA	NA	NA	NA	NA	NA	-1.97144	-1.63062	-2.0399	NA	NA	NA	NA	NA	NA	NA		Cetuximab core Gene Group	Erlotinib core gene group
CALCRL	NA	NA	NA	NA	NA	NA	-1.04536	-1.43164	-1.36593	NA	NA	NA	NA	NA	NA	NA		Cetuximab core Gene Group	Erlotinib core gene group
CARD14	NA	NA	NA	NA	NA	NA	-1.47495	NA	NA	NA	NA	NA	NA	NA	NA	NA		Cetuximab core Gene Group
CARD17	NA	NA	NA	NA	NA	NA	-5.71262	NA	NA	NA	NA	NA	NA	NA	NA	NA		Cetuximab core Gene Group
CBS	NA	NA	NA	NA	NA	NA	1.71615	2.54686	NA	NA	NA	NA	NA	NA	NA	NA		Cetuximab core Gene Group	Erlotinib core gene group
CCBE1	NA	NA	NA	NA	NA	NA	-1.73022	NA	NA	NA	NA	NA	NA	NA	NA	NA		Cetuximab core Gene Group
CCDC102B	NA	NA	NA	NA	NA	NA	-2.04614	-1.93841	NA	NA	NA	NA	NA	NA	NA	NA		Cetuximab core Gene Group	Erlotinib core gene group
CCDC136	NA	NA	NA	NA	NA	NA	-1.47721	NA	-1.68697	NA	NA	NA	NA	NA	NA	NA		Cetuximab core Gene Group
CCDC38	NA	NA	NA	NA	NA	NA	-1.9917	NA	NA	NA	NA	NA	NA	NA	NA	NA		Cetuximab core Gene Group
CNFN	NA	NA	NA	NA	NA	NA	-2.04707	NA	NA	NA	NA	NA	NA	NA	NA	NA		Cetuximab core Gene Group
COLCA2	NA	NA	NA	NA	NA	NA	-3.95671	-3.99681	NA	NA	NA	NA	NA	NA	NA	NA		Cetuximab core Gene Group	Erlotinib core gene group
CPQ	NA	NA	NA	NA	NA	NA	-1.27987	-1.89024	NA	NA	NA	NA	NA	NA	NA	NA		Cetuximab core Gene Group	Erlotinib core gene group
CRELD1	NA	NA	NA	NA	NA	NA	-1.01511	-1.04571	NA	NA	NA	NA	NA	NA	NA	NA		Cetuximab core Gene Group	Erlotinib core gene group
CROCC	NA	NA	NA	NA	NA	NA	-1.27801	NA	NA	NA	NA	NA	NA	NA	NA	NA		Cetuximab core Gene Group
CROCCP3	NA	NA	NA	NA	NA	NA	-1.5006	NA	-1.66682	NA	NA	NA	NA	NA	NA	NA		Cetuximab core Gene Group
CSRNP3	NA	NA	NA	NA	NA	NA	-1.59579	NA	NA	NA	NA	NA	NA	NA	NA	NA		Cetuximab core Gene Group
CTSA	NA	NA	NA	NA	NA	NA	-1.1138	-1.45602	-1.25266	NA	NA	NA	NA	NA	NA	NA		Cetuximab core Gene Group	Erlotinib core gene group
CYGB	NA	NA	NA	NA	NA	NA	-3.84549	-3.48077	NA	NA	NA	NA	NA	NA	NA	NA		Cetuximab core Gene Group	Erlotinib core gene group
CYP1A1	NA	NA	NA	NA	NA	NA	-3.74327	-5.54862	-4.44185	-3.49342	-6.02068	NA	2.05294	-3.42166	NA	NA		Cetuximab core Gene Group
CYP39A1	NA	NA	NA	NA	NA	NA	-1.05475	-1.57003	-1.26845	NA	-2.21831	NA	NA	-1.20943	NA	NA		Cetuximab core Gene Group	Erlotinib core gene group
CYR61	NA	NA	NA	NA	NA	NA	1.24316	1.40561	NA	NA	NA	NA	NA	NA	NA	NA		Cetuximab core Gene Group	Erlotinib core gene group
DARS-AS1	NA	NA	NA	NA	NA	NA	-1.34398	NA	NA	NA	NA	NA	NA	NA	NA	NA		Cetuximab core Gene Group
DCST2	NA	NA	NA	NA	NA	NA	-2.74691	NA	NA	NA	NA	NA	NA	NA	NA	NA		Cetuximab core Gene Group
DDIAS	NA	NA	NA	NA	NA	NA	1.0641	NA	1.03528	NA	NA	NA	NA	NA	NA	NA		Cetuximab core Gene Group
DENND6B	NA	NA	NA	NA	NA	NA	-1.82394	-1.62713	-2.13483	NA	-2.24044	NA	NA	NA	NA	NA		Cetuximab core Gene Group	Erlotinib core gene group
DHRS12	NA	NA	NA	NA	NA	NA	-1.15613	-1.38832	NA	NA	NA	NA	NA	NA	NA	NA		Cetuximab core Gene Group	Erlotinib core gene group
DHRS3	NA	NA	NA	NA	NA	NA	-1.32764	-1.43264	-1.5356	NA	-2.1705	NA	NA	NA	NA	NA		Cetuximab core Gene Group	Erlotinib core gene group
DLEU7-AS1	NA	NA	NA	NA	NA	NA	-2.33631	NA	NA	NA	NA	NA	NA	NA	NA	NA		Cetuximab core Gene Group
DLX4	NA	NA	NA	NA	NA	NA	-3.08575	-2.68603	NA	NA	NA	NA	NA	NA	NA	NA		Cetuximab core Gene Group	Erlotinib core gene group
DNAJC28	NA	NA	NA	NA	NA	NA	-1.35387	-1.66297	-1.66077	NA	NA	NA	NA	NA	NA	NA		Cetuximab core Gene Group	Erlotinib core gene group
DOCK8	NA	NA	NA	NA	NA	NA	-3.86343	-2.73963	NA	NA	NA	NA	NA	NA	NA	NA		Cetuximab core Gene Group	Erlotinib core gene group
EEF1A1P30	NA	NA	NA	NA	NA	NA	-1.88417	NA	NA	NA	NA	NA	NA	NA	NA	NA		Cetuximab core Gene Group
EIF3C	NA	NA	NA	NA	NA	NA	1.30642	NA	1.17871	NA	NA	NA	NA	NA	NA	NA		Cetuximab core Gene Group
ELAVL2	NA	NA	NA	NA	NA	NA	-1.08691	NA	NA	NA	NA	NA	NA	NA	NA	NA		Cetuximab core Gene Group
ELMO3	NA	NA	NA	NA	NA	NA	-1.02065	NA	NA	NA	NA	NA	NA	NA	NA	NA		Cetuximab core Gene Group
ENTPD3-AS1	NA	NA	NA	NA	NA	NA	-1.1619	-1.29328	NA	NA	NA	NA	NA	NA	NA	NA		Cetuximab core Gene Group	Erlotinib core gene group
EPAS1	NA	NA	NA	NA	NA	NA	-1.11046	-1.32818	NA	NA	NA	NA	NA	NA	NA	NA		Cetuximab core Gene Group	Erlotinib core gene group
EPS8L1	NA	NA	NA	NA	NA	NA	-1.3727	NA	NA	NA	NA	NA	NA	NA	NA	-2.83534		Cetuximab core Gene Group
ERAP2	NA	NA	NA	NA	NA	NA	-1.20169	NA	-1.13203	NA	NA	NA	NA	NA	NA	NA		Cetuximab core Gene Group
ESPN	NA	NA	NA	NA	NA	NA	-3.79554	-3.64876	NA	NA	NA	NA	NA	NA	NA	NA		Cetuximab core Gene Group	Erlotinib core gene group
ETNK2	NA	NA	NA	NA	NA	NA	-2.60148	NA	NA	NA	NA	NA	NA	NA	NA	NA		Cetuximab core Gene Group
ETV1	NA	NA	NA	NA	NA	NA	1.70863	2.21203	NA	1.63405	NA	NA	NA	1.63253	NA	NA		Cetuximab core Gene Group
FAM181B	NA	NA	NA	NA	NA	NA	-2.04605	NA	NA	NA	NA	NA	NA	NA	NA	NA		Cetuximab core Gene Group
FBXO2	NA	NA	NA	NA	NA	NA	-1.14157	NA	-1.1312	NA	NA	NA	NA	NA	NA	NA		Cetuximab core Gene Group
FGGY	NA	NA	NA	NA	NA	NA	-1.00468	-1.122	-1.2415	NA	-1.10085	NA	NA	NA	NA	NA		Cetuximab core Gene Group	Erlotinib core gene group
FMN1	NA	NA	NA	NA	NA	NA	-1.12904	NA	-1.01407	NA	NA	NA	NA	NA	NA	-1.30023		Cetuximab core Gene Group
FMO4	NA	NA	NA	NA	NA	NA	-1.30387	-1.41922	-1.49403	NA	NA	NA	NA	NA	NA	NA		Cetuximab core Gene Group	Erlotinib core gene group
FOXA2	NA	NA	NA	NA	NA	NA	1.64534	2.47035	2.26582	2.80688	NA	NA	NA	2.4306	NA	NA		Cetuximab core Gene Group
FREM1	NA	NA	NA	NA	NA	NA	-1.50181	NA	NA	NA	NA	NA	NA	NA	NA	NA		Cetuximab core Gene Group
FRMPD1	NA	NA	NA	NA	NA	NA	-3.11954	NA	NA	NA	NA	NA	NA	NA	NA	NA		Cetuximab core Gene Group
FSIP2-AS1	NA	NA	NA	NA	NA	NA	-2.01582	NA	NA	NA	NA	NA	NA	NA	NA	NA		Cetuximab core Gene Group
FZD10	NA	NA	NA	NA	NA	NA	-1.14384	-1.54912	-1.17121	NA	NA	NA	1.46032	NA	NA	NA		Cetuximab core Gene Group	Erlotinib core gene group
FZD2	NA	NA	NA	NA	NA	NA	-1.0259	NA	-1.1291	NA	-1.4562	NA	NA	NA	NA	NA		Cetuximab core Gene Group
GBP1	NA	NA	NA	NA	NA	NA	-1.09084	NA	-1.06945	NA	NA	NA	NA	NA	NA	NA		Cetuximab core Gene Group
GBP3	NA	NA	NA	NA	NA	NA	-1.04896	-1.19279	-1.03195	NA	NA	NA	NA	NA	NA	-1.89706		Cetuximab core Gene Group	Erlotinib core gene group
GDPD2	NA	NA	NA	NA	NA	NA	-2.83689	NA	NA	NA	NA	NA	NA	NA	NA	NA		Cetuximab core Gene Group
GIMAP2	NA	NA	NA	NA	NA	NA	-2.59328	-3.3567	-2.93184	NA	NA	NA	NA	NA	NA	NA		Cetuximab core Gene Group	Erlotinib core gene group
GLDN	NA	NA	NA	NA	NA	NA	-1.41988	-1.4379	-1.80387	NA	NA	NA	NA	NA	NA	NA		Cetuximab core Gene Group	Erlotinib core gene group
GLUL	NA	NA	NA	NA	NA	NA	-1.28839	-1.19761	NA	NA	NA	NA	NA	NA	NA	NA		Cetuximab core Gene Group	Erlotinib core gene group
GPR155	NA	NA	NA	NA	NA	NA	-1.02206	-1.22613	NA	NA	NA	NA	NA	NA	NA	NA		Cetuximab core Gene Group	Erlotinib core gene group
GPR3	NA	NA	NA	NA	NA	NA	2.07727	3.20933	2.67462	2.02317	2.81343	NA	NA	2.0276	NA	NA		Cetuximab core Gene Group
GPRC5C	NA	NA	NA	NA	NA	NA	-1.05028	NA	-1.02199	NA	NA	NA	NA	NA	NA	NA		Cetuximab core Gene Group
GRAMD1C	NA	NA	NA	NA	NA	NA	-1.20613	-1.2974	-1.44281	NA	NA	NA	NA	NA	NA	NA		Cetuximab core Gene Group	Erlotinib core gene group
GRID2IP	NA	NA	NA	NA	NA	NA	-3.30002	NA	NA	NA	NA	NA	NA	NA	NA	NA		Cetuximab core Gene Group
GSAP	NA	NA	NA	NA	NA	NA	-1.01864	NA	NA	NA	NA	NA	NA	NA	NA	NA		Cetuximab core Gene Group
GSDMB	NA	NA	NA	NA	NA	NA	-1.43919	NA	-1.38182	NA	NA	NA	NA	NA	NA	NA		Cetuximab core Gene Group
GSE1	NA	NA	NA	NA	NA	NA	-1.26818	-1.5279	-1.63131	NA	NA	NA	1.18512	NA	NA	NA		Cetuximab core Gene Group	Erlotinib core gene group
GSTM2	NA	NA	NA	NA	NA	NA	-2.18228	NA	NA	NA	NA	NA	NA	NA	NA	NA		Cetuximab core Gene Group
HCAR3	NA	NA	NA	NA	NA	NA	-2.16136	-1.50286	NA	NA	NA	NA	NA	NA	NA	-3.82517		Cetuximab core Gene Group	Erlotinib core gene group
HES4	NA	NA	NA	NA	NA	NA	-1.14197	-1.62095	NA	NA	NA	NA	NA	NA	NA	NA		Cetuximab core Gene Group	Erlotinib core gene group
HIST1H1A	NA	NA	NA	NA	NA	NA	1.06309	NA	NA	NA	NA	NA	NA	NA	NA	NA		Cetuximab core Gene Group
HIST1H2AJ	NA	NA	NA	NA	NA	NA	1.02858	NA	NA	NA	NA	NA	NA	NA	NA	NA		Cetuximab core Gene Group
HIST1H4L	NA	NA	NA	NA	NA	NA	1.24769	NA	1.22157	NA	NA	NA	NA	NA	NA	NA		Cetuximab core Gene Group
HLA-E	NA	NA	NA	NA	NA	NA	-1.02005	-1.17525	-1.15738	NA	NA	NA	NA	NA	NA	NA		Cetuximab core Gene Group	Erlotinib core gene group
HMGA1P2	NA	NA	NA	NA	NA	NA	2.22554	2.12463	NA	NA	NA	NA	NA	NA	NA	NA		Cetuximab core Gene Group	Erlotinib core gene group
HMGB1P1	NA	NA	NA	NA	NA	NA	-2.82131	NA	NA	NA	NA	NA	NA	NA	NA	NA		Cetuximab core Gene Group
HOTAIR	NA	NA	NA	NA	NA	NA	-1.13551	-1.01369	-1.34539	NA	NA	NA	NA	NA	NA	NA		Cetuximab core Gene Group	Erlotinib core gene group
HOTTIP	NA	NA	NA	NA	NA	NA	-2.62824	NA	NA	NA	NA	NA	NA	NA	NA	NA		Cetuximab core Gene Group
HOXC4	NA	NA	NA	NA	NA	NA	-1.49861	-1.31124	-1.91317	NA	-1.95219	NA	NA	NA	NA	NA		Cetuximab core Gene Group	Erlotinib core gene group
HSD3B7	NA	NA	NA	NA	NA	NA	-1.87242	-1.41514	-1.5016	NA	NA	NA	NA	NA	NA	-1.79991		Cetuximab core Gene Group	Erlotinib core gene group
HSPA2	NA	NA	NA	NA	NA	NA	-1.02634	NA	NA	NA	NA	NA	NA	NA	NA	NA		Cetuximab core Gene Group
HSPB1	NA	NA	NA	NA	NA	NA	-3.21733	-2.77049	-3.05964	NA	NA	NA	NA	NA	NA	NA		Cetuximab core Gene Group	Erlotinib core gene group
IFI27L2	NA	NA	NA	NA	NA	NA	-1.22723	-1.19693	-1.27501	NA	NA	NA	NA	NA	NA	NA		Cetuximab core Gene Group	Erlotinib core gene group
IL11RA	NA	NA	NA	NA	NA	NA	-1.42413	-1.34881	-1.94115	NA	-1.53257	NA	NA	NA	NA	NA		Cetuximab core Gene Group	Erlotinib core gene group
IL15	NA	NA	NA	NA	NA	NA	-1.48894	-1.52925	-1.70986	NA	NA	NA	NA	NA	NA	-2.27447		Cetuximab core Gene Group	Erlotinib core gene group
IL17RC	NA	NA	NA	NA	NA	NA	-1.21953	-1.24335	-1.47047	NA	NA	NA	NA	NA	NA	NA		Cetuximab core Gene Group	Erlotinib core gene group
ILDR1	NA	NA	NA	NA	NA	NA	-1.6508	-1.58869	-2.19552	NA	NA	NA	NA	NA	NA	NA		Cetuximab core Gene Group	Erlotinib core gene group
ING4	NA	NA	NA	NA	NA	NA	-1.27123	-1.23906	-1.29528	NA	NA	NA	NA	NA	NA	NA		Cetuximab core Gene Group	Erlotinib core gene group
INHBA	NA	NA	NA	NA	NA	NA	3.13665	3.8994	2.76212	NA	8.0612	NA	-3.60302	NA	NA	-5.32196		Cetuximab core Gene Group	Erlotinib core gene group
INHBE	NA	NA	NA	NA	NA	NA	5.35847	4.78885	5.80453	NA	NA	NA	NA	NA	NA	NA		Cetuximab core Gene Group	Erlotinib core gene group
IPCEF1	NA	NA	NA	NA	NA	NA	-4.67865	NA	NA	NA	NA	NA	NA	NA	NA	NA		Cetuximab core Gene Group
IQCA1	NA	NA	NA	NA	NA	NA	-1.05641	NA	-1.02417	NA	NA	NA	NA	NA	NA	NA		Cetuximab core Gene Group
IRF1	NA	NA	NA	NA	NA	NA	-1.33191	-1.44764	-1.57807	NA	NA	NA	NA	NA	NA	NA		Cetuximab core Gene Group	Erlotinib core gene group
ITPRIP	NA	NA	NA	NA	NA	NA	1.0389	1.00142	NA	1.048	NA	NA	NA	1.17588	NA	NA		Cetuximab core Gene Group
JAK2	NA	NA	NA	NA	NA	NA	-1.01152	-1.19861	-1.20162	NA	NA	NA	NA	NA	NA	NA		Cetuximab core Gene Group	Erlotinib core gene group
JPH1	NA	NA	NA	NA	NA	NA	1.04199	1.27991	1.10137	NA	NA	NA	-1.07832	NA	NA	NA		Cetuximab core Gene Group	Erlotinib core gene group
KBTBD7	NA	NA	NA	NA	NA	NA	-1.21104	-1.22236	-1.08424	NA	NA	NA	NA	NA	NA	NA		Cetuximab core Gene Group	Erlotinib core gene group
KCNH3	NA	NA	NA	NA	NA	NA	-3.02871	NA	-2.71674	NA	NA	NA	NA	NA	NA	NA		Cetuximab core Gene Group
KCNH4	NA	NA	NA	NA	NA	NA	-5.33222	NA	NA	NA	NA	NA	NA	NA	NA	NA		Cetuximab core Gene Group
KCNQ1OT1	NA	NA	NA	NA	NA	NA	-1.12325	NA	NA	NA	NA	NA	NA	NA	NA	-1.1104		Cetuximab core Gene Group
KLC4	NA	NA	NA	NA	NA	NA	-1.13971	NA	-1.18335	NA	-1.11626	NA	NA	NA	NA	NA		Cetuximab core Gene Group
KLF3	NA	NA	NA	NA	NA	NA	-1.15013	-1.29343	-1.04779	NA	NA	NA	NA	NA	NA	NA		Cetuximab core Gene Group	Erlotinib core gene group
KLF3-AS1	NA	NA	NA	NA	NA	NA	-2.48991	-2.57549	-2.23661	NA	NA	NA	NA	NA	NA	NA		Cetuximab core Gene Group	Erlotinib core gene group
KLHDC1	NA	NA	NA	NA	NA	NA	-2.56181	-2.3559	NA	NA	NA	NA	NA	NA	NA	NA		Cetuximab core Gene Group	Erlotinib core gene group
LHPP	NA	NA	NA	NA	NA	NA	-1.07264	NA	-1.297	NA	-1.57818	NA	NA	NA	NA	NA		Cetuximab core Gene Group
LINC00322	NA	NA	NA	NA	NA	NA	-3.8383	-3.7407	NA	NA	NA	NA	NA	NA	NA	NA		Cetuximab core Gene Group	Erlotinib core gene group
LINC00426	NA	NA	NA	NA	NA	NA	-5.48513	NA	NA	NA	NA	NA	NA	NA	NA	NA		Cetuximab core Gene Group
LINC00847	NA	NA	NA	NA	NA	NA	-1.06452	-1.28587	NA	NA	-1.10566	NA	NA	NA	NA	NA		Cetuximab core Gene Group	Erlotinib core gene group
LINC00933	NA	NA	NA	NA	NA	NA	-2.54579	-2.36883	NA	NA	NA	NA	NA	NA	NA	NA		Cetuximab core Gene Group	Erlotinib core gene group
LINC01133	NA	NA	NA	NA	NA	NA	-5.08716	-4.40394	NA	-3.99194	NA	NA	NA	NA	NA	NA		Cetuximab core Gene Group
LINC01270	NA	NA	NA	NA	NA	NA	-1.19665	-1.14396	-1.48798	NA	-1.49762	NA	NA	NA	NA	NA		Cetuximab core Gene Group	Erlotinib core gene group
LINC01473	NA	NA	NA	NA	NA	NA	-1.63588	NA	NA	NA	NA	NA	NA	NA	NA	NA		Cetuximab core Gene Group
LINC01764	NA	NA	NA	NA	NA	NA	-1.25411	NA	NA	NA	NA	NA	NA	NA	NA	NA		Cetuximab core Gene Group
LINC01836	NA	NA	NA	NA	NA	NA	-1.21266	NA	-1.11345	NA	NA	NA	NA	NA	NA	NA		Cetuximab core Gene Group
LINC02057	NA	NA	NA	NA	NA	NA	-2.26627	-1.84836	-2.25116	NA	NA	NA	NA	NA	NA	NA		Cetuximab core Gene Group	Erlotinib core gene group
LINC02163	NA	NA	NA	NA	NA	NA	-1.44038	-1.2249	NA	NA	NA	NA	NA	NA	NA	NA		Cetuximab core Gene Group	Erlotinib core gene group
LIPG	NA	NA	NA	NA	NA	NA	-3.03729	NA	NA	NA	NA	NA	NA	NA	NA	NA		Cetuximab core Gene Group
LMF1	NA	NA	NA	NA	NA	NA	-1.64994	-1.48289	-1.67092	NA	NA	NA	NA	NA	NA	NA		Cetuximab core Gene Group	Erlotinib core gene group
LMO1	NA	NA	NA	NA	NA	NA	-4.07139	NA	NA	NA	NA	NA	NA	NA	NA	NA		Cetuximab core Gene Group
LNX1	NA	NA	NA	NA	NA	NA	-1.79996	-1.7719	-1.77879	NA	NA	NA	NA	NA	NA	NA		Cetuximab core Gene Group	Erlotinib core gene group
LRG1	NA	NA	NA	NA	NA	NA	-1.86717	NA	-1.70079	NA	NA	NA	NA	NA	NA	NA		Cetuximab core Gene Group
LYRM9	NA	NA	NA	NA	NA	NA	-2.85543	-2.94401	-2.92648	NA	NA	NA	NA	NA	NA	NA		Cetuximab core Gene Group	Erlotinib core gene group
LZTS3	NA	NA	NA	NA	NA	NA	-1.51534	NA	NA	NA	NA	NA	NA	NA	NA	NA		Cetuximab core Gene Group
MAFA	NA	NA	NA	NA	NA	NA	-4.65701	NA	NA	NA	NA	NA	NA	NA	NA	NA		Cetuximab core Gene Group
MAML3	NA	NA	NA	NA	NA	NA	-1.43453	-1.28535	-1.72062	NA	NA	NA	NA	NA	NA	NA		Cetuximab core Gene Group	Erlotinib core gene group
MAOA	NA	NA	NA	NA	NA	NA	-1.09049	NA	NA	NA	NA	NA	NA	NA	NA	NA		Cetuximab core Gene Group
MAP3K14-AS1	NA	NA	NA	NA	NA	NA	-1.34224	-1.32348	-1.68337	NA	NA	NA	NA	NA	NA	NA		Cetuximab core Gene Group	Erlotinib core gene group
MAP3K8	NA	NA	NA	NA	NA	NA	-1.62599	-1.86079	-2.08617	-1.55088	NA	NA	NA	-1.1221	NA	NA		Cetuximab core Gene Group
MAP4K2	NA	NA	NA	NA	NA	NA	-1.06716	NA	NA	NA	NA	NA	NA	NA	NA	NA		Cetuximab core Gene Group
MAST1	NA	NA	NA	NA	NA	NA	-1.63477	NA	NA	NA	NA	NA	NA	NA	NA	NA		Cetuximab core Gene Group
MCF2L2	NA	NA	NA	NA	NA	NA	-1.5537	-1.52614	-1.75674	NA	NA	NA	NA	NA	NA	NA		Cetuximab core Gene Group	Erlotinib core gene group
MEF2C-AS1	NA	NA	NA	NA	NA	NA	-4.91277	NA	NA	NA	NA	NA	NA	NA	NA	NA		Cetuximab core Gene Group
MIR200CHG	NA	NA	NA	NA	NA	NA	-1.15916	-1.18227	NA	NA	NA	NA	NA	NA	NA	NA		Cetuximab core Gene Group	Erlotinib core gene group
MIR210HG	NA	NA	NA	NA	NA	NA	-1.94394	NA	NA	NA	NA	NA	NA	NA	NA	NA		Cetuximab core Gene Group
MIR23B	NA	NA	NA	NA	NA	NA	-3.34247	-3.00373	NA	NA	NA	NA	NA	NA	NA	NA		Cetuximab core Gene Group	Erlotinib core gene group
MIR27B	NA	NA	NA	NA	NA	NA	-3.11419	-2.87969	-3.06643	NA	NA	NA	NA	NA	NA	NA		Cetuximab core Gene Group	Erlotinib core gene group
MIR3936	NA	NA	NA	NA	NA	NA	-1.78789	NA	NA	NA	NA	NA	NA	NA	NA	NA		Cetuximab core Gene Group
MIR6081	NA	NA	NA	NA	NA	NA	-2.96371	NA	NA	NA	NA	NA	NA	NA	NA	NA		Cetuximab core Gene Group
MIR9-3HG	NA	NA	NA	NA	NA	NA	-3.8486	NA	NA	NA	NA	NA	NA	NA	NA	NA		Cetuximab core Gene Group
MKRN2OS	NA	NA	NA	NA	NA	NA	-1.85995	-1.89084	-1.77944	NA	NA	NA	NA	NA	NA	NA		Cetuximab core Gene Group	Erlotinib core gene group
MMD	NA	NA	NA	NA	NA	NA	1.0118	NA	NA	NA	NA	NA	NA	NA	NA	NA		Cetuximab core Gene Group
MMP13	NA	NA	NA	NA	NA	NA	-3.25704	NA	NA	NA	NA	NA	NA	NA	NA	NA		Cetuximab core Gene Group
MMP24-AS1	NA	NA	NA	NA	NA	NA	1.14698	1.17539	NA	NA	1.68965	NA	NA	NA	NA	NA		Cetuximab core Gene Group	Erlotinib core gene group
MMP7	NA	NA	NA	NA	NA	NA	-5.1539	NA	NA	NA	NA	NA	NA	NA	NA	NA		Cetuximab core Gene Group
MMRN2	NA	NA	NA	NA	NA	NA	-1.34426	NA	NA	NA	NA	NA	NA	NA	NA	NA		Cetuximab core Gene Group
MOSPD3	NA	NA	NA	NA	NA	NA	-1.17724	-1.03109	NA	NA	NA	NA	NA	NA	NA	NA		Cetuximab core Gene Group	Erlotinib core gene group
MOV10L1	NA	NA	NA	NA	NA	NA	-2.65196	NA	NA	NA	NA	NA	NA	NA	NA	NA		Cetuximab core Gene Group
MPND	NA	NA	NA	NA	NA	NA	-1.03329	NA	NA	NA	NA	NA	NA	NA	NA	NA		Cetuximab core Gene Group
MR1	NA	NA	NA	NA	NA	NA	-1.00148	-1.11686	NA	NA	NA	NA	NA	NA	NA	NA		Cetuximab core Gene Group	Erlotinib core gene group
MRPL3	NA	NA	NA	NA	NA	NA	1.03862	NA	1.15195	NA	NA	NA	NA	NA	NA	NA		Cetuximab core Gene Group
MST1	NA	NA	NA	NA	NA	NA	-1.9229	NA	NA	NA	NA	NA	NA	NA	NA	NA		Cetuximab core Gene Group
MTMR9LP	NA	NA	NA	NA	NA	NA	-1.99333	NA	NA	NA	NA	NA	NA	NA	NA	NA		Cetuximab core Gene Group
MYC	NA	NA	NA	NA	NA	NA	1.21648	1.50459	1.5406	1.04276	1.34184	NA	NA	1.13667	NA	NA		Cetuximab core Gene Group
MYCBPAP	NA	NA	NA	NA	NA	NA	-1.38107	NA	NA	NA	NA	NA	NA	NA	NA	NA		Cetuximab core Gene Group
MYO10	NA	NA	NA	NA	NA	NA	1.00469	NA	NA	NA	1.02946	NA	NA	NA	NA	NA		Cetuximab core Gene Group
NATD1	NA	NA	NA	NA	NA	NA	-2.32174	-2.50309	-2.52241	NA	NA	NA	2.05217	NA	NA	NA		Cetuximab core Gene Group	Erlotinib core gene group
NFE2	NA	NA	NA	NA	NA	NA	-4.48614	NA	NA	NA	NA	NA	NA	NA	NA	NA		Cetuximab core Gene Group
NGEF	NA	NA	NA	NA	NA	NA	1.02959	1.36182	NA	NA	NA	NA	NA	NA	NA	NA		Cetuximab core Gene Group	Erlotinib core gene group
NOL4L	NA	NA	NA	NA	NA	NA	-1.18441	NA	NA	NA	NA	NA	NA	NA	NA	NA		Cetuximab core Gene Group
NONOP2	NA	NA	NA	NA	NA	NA	-2.31768	NA	NA	NA	NA	NA	NA	NA	NA	NA		Cetuximab core Gene Group
NOTCH1	NA	NA	NA	NA	NA	NA	-1.27983	-1.32725	NA	NA	NA	NA	1.15482	NA	NA	NA		Cetuximab core Gene Group	Erlotinib core gene group
NPM1	NA	NA	NA	NA	NA	NA	1.00837	NA	NA	NA	NA	NA	NA	NA	NA	NA		Cetuximab core Gene Group
NPY1R	NA	NA	NA	NA	NA	NA	-1.93904	NA	-1.97008	NA	NA	NA	NA	NA	NA	NA		Cetuximab core Gene Group
NR1D1	NA	NA	NA	NA	NA	NA	1.00991	1.40452	NA	NA	NA	NA	NA	NA	NA	NA		Cetuximab core Gene Group	Erlotinib core gene group
NR2F2	NA	NA	NA	NA	NA	NA	-1.24154	-1.29908	-1.05258	NA	NA	NA	NA	NA	NA	NA		Cetuximab core Gene Group	Erlotinib core gene group
NSUN7	NA	NA	NA	NA	NA	NA	-1.03771	NA	-1.07677	NA	NA	NA	NA	NA	NA	NA		Cetuximab core Gene Group
NUDT14	NA	NA	NA	NA	NA	NA	-1.00325	-1.13155	NA	NA	NA	NA	NA	NA	NA	NA		Cetuximab core Gene Group	Erlotinib core gene group
NUDT18	NA	NA	NA	NA	NA	NA	-1.14768	NA	-1.00139	NA	NA	NA	NA	NA	NA	NA		Cetuximab core Gene Group
NXPH3	NA	NA	NA	NA	NA	NA	-3.29595	NA	NA	NA	NA	NA	NA	NA	NA	NA		Cetuximab core Gene Group
ODF3B	NA	NA	NA	NA	NA	NA	-1.37196	NA	-1.57182	NA	NA	NA	NA	NA	NA	NA		Cetuximab core Gene Group
OPHN1	NA	NA	NA	NA	NA	NA	-1.0475	-1.05315	-1.09181	NA	NA	NA	NA	NA	NA	NA		Cetuximab core Gene Group	Erlotinib core gene group
OSER1-AS1	NA	NA	NA	NA	NA	NA	-1.46679	NA	-1.58792	NA	NA	NA	NA	NA	NA	NA		Cetuximab core Gene Group
PAK1IP1	NA	NA	NA	NA	NA	NA	1.21012	1.06824	1.21299	NA	NA	NA	NA	NA	NA	NA		Cetuximab core Gene Group	Erlotinib core gene group
PATL2	NA	NA	NA	NA	NA	NA	-2.0095	-1.71787	-1.88719	NA	NA	NA	NA	NA	NA	-2.27843		Cetuximab core Gene Group	Erlotinib core gene group
PAXBP1-AS1	NA	NA	NA	NA	NA	NA	-1.60287	-1.18456	NA	NA	NA	NA	NA	NA	NA	NA		Cetuximab core Gene Group	Erlotinib core gene group
PCAT7	NA	NA	NA	NA	NA	NA	-1.77713	NA	-2.0608	NA	NA	NA	NA	NA	NA	NA		Cetuximab core Gene Group
PCDHGA11	NA	NA	NA	NA	NA	NA	-1.61937	NA	NA	NA	NA	NA	NA	NA	NA	NA		Cetuximab core Gene Group
PCDHGA5	NA	NA	NA	NA	NA	NA	-2.98502	NA	NA	NA	NA	NA	NA	NA	NA	NA		Cetuximab core Gene Group
PCDHGA6	NA	NA	NA	NA	NA	NA	-2.36406	-2.5308	-2.53424	NA	NA	NA	NA	NA	NA	NA		Cetuximab core Gene Group	Erlotinib core gene group
PCDHGA8	NA	NA	NA	NA	NA	NA	-3.63163	-3.61395	NA	NA	NA	NA	NA	NA	NA	NA		Cetuximab core Gene Group	Erlotinib core gene group
PCDHGB8P	NA	NA	NA	NA	NA	NA	-2.61582	-2.26619	NA	NA	NA	NA	NA	NA	NA	NA		Cetuximab core Gene Group	Erlotinib core gene group
PCED1B	NA	NA	NA	NA	NA	NA	-1.02172	-1.16988	-1.23489	NA	-1.37185	NA	NA	NA	NA	NA		Cetuximab core Gene Group	Erlotinib core gene group
PCOLCE2	NA	NA	NA	NA	NA	NA	1.10599	1.17371	1.62393	NA	1.34711	NA	NA	NA	NA	NA		Cetuximab core Gene Group	Erlotinib core gene group
PCSK4	NA	NA	NA	NA	NA	NA	-1.81903	NA	NA	NA	NA	NA	NA	NA	NA	NA		Cetuximab core Gene Group
PDCD11	NA	NA	NA	NA	NA	NA	1.08579	1.36161	1.21159	NA	1.11245	NA	NA	NA	NA	NA		Cetuximab core Gene Group	Erlotinib core gene group
PDCD2L	NA	NA	NA	NA	NA	NA	1.08725	1.15854	1.53074	NA	1.26281	NA	NA	NA	NA	NA		Cetuximab core Gene Group	Erlotinib core gene group
PGAM1P8	NA	NA	NA	NA	NA	NA	-1.49836	-1.26472	NA	NA	NA	NA	NA	NA	NA	NA		Cetuximab core Gene Group	Erlotinib core gene group
PGPEP1	NA	NA	NA	NA	NA	NA	-1.35385	NA	-1.17735	NA	NA	NA	NA	NA	NA	NA		Cetuximab core Gene Group
PHF11	NA	NA	NA	NA	NA	NA	-1.07743	NA	NA	NA	NA	NA	NA	NA	NA	NA		Cetuximab core Gene Group
PIK3IP1	NA	NA	NA	NA	NA	NA	-4.07517	-3.9022	-4.21872	NA	NA	NA	NA	NA	NA	NA		Cetuximab core Gene Group	Erlotinib core gene group
PILRA	NA	NA	NA	NA	NA	NA	-3.24966	NA	NA	NA	NA	NA	NA	NA	NA	NA		Cetuximab core Gene Group
PLCD4	NA	NA	NA	NA	NA	NA	-3.02147	NA	NA	NA	NA	NA	NA	NA	NA	NA		Cetuximab core Gene Group
PLCH2	NA	NA	NA	NA	NA	NA	-4.26675	NA	NA	NA	NA	NA	NA	NA	NA	NA		Cetuximab core Gene Group
PLPP1	NA	NA	NA	NA	NA	NA	-1.10387	NA	NA	NA	NA	NA	NA	NA	NA	NA		Cetuximab core Gene Group
PMEL	NA	NA	NA	NA	NA	NA	-1.97239	NA	NA	NA	NA	NA	NA	NA	NA	NA		Cetuximab core Gene Group
PMEPA1	NA	NA	NA	NA	NA	NA	1.29954	NA	NA	NA	NA	NA	NA	NA	NA	NA		Cetuximab core Gene Group
PMM1	NA	NA	NA	NA	NA	NA	-1.0717	NA	NA	NA	NA	NA	NA	NA	NA	NA		Cetuximab core Gene Group
PNO1	NA	NA	NA	NA	NA	NA	1.06859	NA	1.3251	NA	1.06385	NA	NA	NA	NA	NA		Cetuximab core Gene Group
PNPLA7	NA	NA	NA	NA	NA	NA	-1.15909	NA	NA	NA	NA	NA	NA	NA	NA	NA		Cetuximab core Gene Group
PODXL	NA	NA	NA	NA	NA	NA	-1.47597	NA	-1.31913	NA	NA	NA	NA	NA	NA	NA		Cetuximab core Gene Group
POP7	NA	NA	NA	NA	NA	NA	1.0226	NA	NA	NA	NA	NA	NA	NA	NA	NA		Cetuximab core Gene Group
POU2F3	NA	NA	NA	NA	NA	NA	-2.18989	NA	NA	NA	NA	NA	NA	NA	NA	NA		Cetuximab core Gene Group
PPARGC1A	NA	NA	NA	NA	NA	NA	-1.07439	NA	NA	NA	NA	NA	NA	NA	NA	NA		Cetuximab core Gene Group
PPM1N	NA	NA	NA	NA	NA	NA	-1.52557	NA	-1.48734	NA	NA	NA	NA	NA	NA	NA		Cetuximab core Gene Group
PPP1R12A-AS1	NA	NA	NA	NA	NA	NA	-1.20774	NA	NA	NA	NA	NA	NA	NA	NA	NA		Cetuximab core Gene Group
PPP2R5B	NA	NA	NA	NA	NA	NA	-1.0233	NA	NA	NA	NA	NA	NA	NA	NA	NA		Cetuximab core Gene Group
PRDM6	NA	NA	NA	NA	NA	NA	-2.66468	NA	NA	NA	NA	NA	NA	NA	NA	NA		Cetuximab core Gene Group
PRKAR2A-AS1	NA	NA	NA	NA	NA	NA	-1.44357	NA	-1.51714	NA	NA	NA	NA	NA	NA	NA		Cetuximab core Gene Group
PRR7	NA	NA	NA	NA	NA	NA	1.11966	2.03282	1.98528	1.22786	NA	NA	NA	NA	NA	NA		Cetuximab core Gene Group
PRSS8	NA	NA	NA	NA	NA	NA	-1.49689	-1.48138	NA	NA	NA	NA	1.22416	NA	NA	NA		Cetuximab core Gene Group	Erlotinib core gene group
PTH2R	NA	NA	NA	NA	NA	NA	-1.02391	NA	NA	NA	NA	NA	NA	NA	NA	NA		Cetuximab core Gene Group
PTPRE	NA	NA	NA	NA	NA	NA	1.03762	1.12762	1.2209	NA	2.53087	NA	NA	NA	NA	NA		Cetuximab core Gene Group	Erlotinib core gene group
PWAR6	NA	NA	NA	NA	NA	NA	-2.0056	NA	NA	NA	NA	NA	NA	NA	NA	NA		Cetuximab core Gene Group
PYROXD2	NA	NA	NA	NA	NA	NA	-1.27812	-1.19717	-1.66726	NA	-1.37564	NA	NA	NA	NA	NA		Cetuximab core Gene Group	Erlotinib core gene group
RAB3A	NA	NA	NA	NA	NA	NA	-2.67226	-2.01505	-2.7171	NA	NA	NA	NA	NA	NA	NA		Cetuximab core Gene Group	Erlotinib core gene group
RASD1	NA	NA	NA	NA	NA	NA	-3.23295	-2.80136	NA	NA	NA	NA	NA	NA	NA	NA		Cetuximab core Gene Group	Erlotinib core gene group
REEP1	NA	NA	NA	NA	NA	NA	-2.67262	-2.20181	NA	NA	NA	NA	NA	NA	NA	NA		Cetuximab core Gene Group	Erlotinib core gene group
RFX5	NA	NA	NA	NA	NA	NA	-1.12631	-1.01064	NA	NA	NA	NA	NA	NA	NA	NA		Cetuximab core Gene Group	Erlotinib core gene group
RGS17	NA	NA	NA	NA	NA	NA	1.30809	1.30749	NA	1.07452	NA	NA	NA	NA	NA	NA		Cetuximab core Gene Group
RGS6	NA	NA	NA	NA	NA	NA	-4.43012	NA	NA	NA	NA	NA	NA	NA	NA	NA		Cetuximab core Gene Group
RGS9	NA	NA	NA	NA	NA	NA	-1.03604	NA	-1.01206	NA	NA	NA	NA	NA	NA	NA		Cetuximab core Gene Group
RILP	NA	NA	NA	NA	NA	NA	-1.03016	NA	NA	NA	NA	NA	NA	NA	NA	NA		Cetuximab core Gene Group
RLN1	NA	NA	NA	NA	NA	NA	-1.75996	NA	NA	NA	NA	NA	NA	NA	NA	NA		Cetuximab core Gene Group
RNF224	NA	NA	NA	NA	NA	NA	2.60949	2.17148	NA	NA	NA	NA	NA	NA	NA	NA		Cetuximab core Gene Group	Erlotinib core gene group
RNVU1-19	NA	NA	NA	NA	NA	NA	1.80158	1.91897	NA	NA	NA	NA	NA	NA	NA	NA		Cetuximab core Gene Group	Erlotinib core gene group
RPL22L1	NA	NA	NA	NA	NA	NA	1.18131	NA	1.04153	NA	NA	NA	NA	NA	NA	NA		Cetuximab core Gene Group
RTBDN	NA	NA	NA	NA	NA	NA	-4.11074	-3.82877	NA	NA	NA	NA	NA	NA	NA	NA		Cetuximab core Gene Group	Erlotinib core gene group
SAMD12	NA	NA	NA	NA	NA	NA	-1.06311	-1.14119	-1.29822	NA	-1.09537	NA	NA	NA	NA	NA		Cetuximab core Gene Group	Erlotinib core gene group
SCAMP5	NA	NA	NA	NA	NA	NA	-1.78495	NA	NA	NA	NA	NA	NA	NA	NA	NA		Cetuximab core Gene Group
SCARNA21	NA	NA	NA	NA	NA	NA	-1.09053	NA	NA	NA	NA	NA	NA	NA	NA	NA		Cetuximab core Gene Group
SDCBP2	NA	NA	NA	NA	NA	NA	-2.20953	NA	NA	NA	NA	NA	NA	NA	NA	-3.72246		Cetuximab core Gene Group
SDF2L1	NA	NA	NA	NA	NA	NA	1.01854	NA	1.07269	NA	NA	NA	NA	NA	NA	NA		Cetuximab core Gene Group
SELENOP	NA	NA	NA	NA	NA	NA	-2.55904	-3.45186	-2.84883	NA	-3.91233	NA	2.79377	NA	NA	NA		Cetuximab core Gene Group	Erlotinib core gene group
SERPINB9P1	NA	NA	NA	NA	NA	NA	-2.2745	NA	-2.25494	NA	NA	NA	NA	NA	NA	NA		Cetuximab core Gene Group
SERPINE2	NA	NA	NA	NA	NA	NA	1.40362	NA	NA	NA	NA	NA	NA	NA	NA	NA		Cetuximab core Gene Group
SERPINF1	NA	NA	NA	NA	NA	NA	-2.69605	NA	NA	NA	NA	NA	NA	NA	NA	NA		Cetuximab core Gene Group
SERPINF2	NA	NA	NA	NA	NA	NA	-2.09582	-1.76395	NA	NA	NA	NA	NA	NA	NA	NA		Cetuximab core Gene Group	Erlotinib core gene group
SH3D21	NA	NA	NA	NA	NA	NA	-1.17962	NA	-1.00516	NA	NA	NA	NA	NA	NA	NA		Cetuximab core Gene Group
SLC1A1	NA	NA	NA	NA	NA	NA	-1.17782	-1.53249	-1.47536	NA	-1.30833	NA	NA	NA	NA	NA		Cetuximab core Gene Group	Erlotinib core gene group
SLC2A5	NA	NA	NA	NA	NA	NA	-3.16216	NA	NA	NA	NA	NA	NA	NA	NA	NA		Cetuximab core Gene Group
SLC35E2	NA	NA	NA	NA	NA	NA	-1.07485	NA	NA	NA	NA	NA	NA	NA	NA	NA		Cetuximab core Gene Group
SLC52A1	NA	NA	NA	NA	NA	NA	-1.50869	NA	-1.30551	NA	NA	NA	NA	NA	NA	NA		Cetuximab core Gene Group
SLC6A10P	NA	NA	NA	NA	NA	NA	-1.12545	-1.50628	-1.83096	NA	-1.55119	NA	NA	NA	NA	NA		Cetuximab core Gene Group	Erlotinib core gene group
SLC9A7P1	NA	NA	NA	NA	NA	NA	-2.81179	-2.75308	-2.8787	NA	NA	NA	NA	NA	NA	NA		Cetuximab core Gene Group	Erlotinib core gene group
SLPI	NA	NA	NA	NA	NA	NA	-2.54255	-2.51453	NA	NA	NA	NA	NA	NA	NA	NA		Cetuximab core Gene Group	Erlotinib core gene group
SMARCA1	NA	NA	NA	NA	NA	NA	-1.03062	-1.01131	-1.0582	NA	NA	NA	NA	NA	NA	NA		Cetuximab core Gene Group	Erlotinib core gene group
SMOC2	NA	NA	NA	NA	NA	NA	-1.49377	-1.24149	NA	NA	NA	NA	1.47828	NA	NA	NA		Cetuximab core Gene Group	Erlotinib core gene group
SMPDL3B	NA	NA	NA	NA	NA	NA	-2.00586	NA	NA	NA	NA	NA	NA	NA	NA	NA		Cetuximab core Gene Group
SNX33	NA	NA	NA	NA	NA	NA	-1.02357	NA	-1.00829	NA	NA	NA	NA	NA	NA	NA		Cetuximab core Gene Group
SORBS2	NA	NA	NA	NA	NA	NA	-1.58933	-1.77889	-1.86909	NA	-2.60545	NA	NA	NA	NA	NA		Cetuximab core Gene Group	Erlotinib core gene group
SOX2-OT	NA	NA	NA	NA	NA	NA	-2.50646	-2.0645	NA	NA	NA	NA	NA	NA	NA	NA		Cetuximab core Gene Group	Erlotinib core gene group
SPATA24	NA	NA	NA	NA	NA	NA	-1.3297	NA	NA	NA	NA	NA	NA	NA	NA	NA		Cetuximab core Gene Group
SPATA9	NA	NA	NA	NA	NA	NA	-4.10033	NA	NA	NA	NA	NA	NA	NA	NA	NA		Cetuximab core Gene Group
SPOCD1	NA	NA	NA	NA	NA	NA	1.09194	1.53283	NA	1.59565	NA	NA	NA	NA	NA	NA		Cetuximab core Gene Group
SPRY2	NA	NA	NA	NA	NA	NA	1.11883	1.54774	1.06062	1.24361	2.42831	NA	NA	1.11877	NA	NA		Cetuximab core Gene Group
SPTBN5	NA	NA	NA	NA	NA	NA	-1.09179	NA	-1.14816	NA	NA	NA	NA	NA	NA	-1.76183		Cetuximab core Gene Group
STAC	NA	NA	NA	NA	NA	NA	1.26562	1.40163	NA	NA	NA	NA	NA	NA	NA	NA		Cetuximab core Gene Group	Erlotinib core gene group
STAT2	NA	NA	NA	NA	NA	NA	-1.49272	-1.60047	-1.7026	NA	NA	NA	NA	NA	NA	NA		Cetuximab core Gene Group	Erlotinib core gene group
STPG3	NA	NA	NA	NA	NA	NA	-5.24891	NA	NA	NA	NA	NA	NA	NA	NA	NA		Cetuximab core Gene Group
STX19	NA	NA	NA	NA	NA	NA	-2.92693	NA	NA	NA	NA	NA	NA	NA	NA	NA		Cetuximab core Gene Group
SULT1A2	NA	NA	NA	NA	NA	NA	-1.75807	-1.41154	-1.62556	NA	NA	NA	NA	NA	NA	NA		Cetuximab core Gene Group	Erlotinib core gene group
SYNC	NA	NA	NA	NA	NA	NA	-2.29258	-2.3908	-2.10833	NA	NA	NA	NA	NA	NA	NA		Cetuximab core Gene Group	Erlotinib core gene group
SYTL2	NA	NA	NA	NA	NA	NA	-1.39503	NA	NA	NA	NA	NA	NA	NA	NA	NA		Cetuximab core Gene Group
TCF7	NA	NA	NA	NA	NA	NA	1.15743	NA	NA	NA	NA	NA	NA	NA	NA	1.61212		Cetuximab core Gene Group
TCTA	NA	NA	NA	NA	NA	NA	-1.03917	NA	NA	NA	NA	NA	NA	NA	NA	NA		Cetuximab core Gene Group
THNSL2	NA	NA	NA	NA	NA	NA	-1.34955	-1.30422	-1.49237	NA	NA	NA	NA	NA	NA	NA		Cetuximab core Gene Group	Erlotinib core gene group
THSD1	NA	NA	NA	NA	NA	NA	1.20181	NA	NA	NA	NA	NA	NA	NA	NA	NA		Cetuximab core Gene Group
TMEM125	NA	NA	NA	NA	NA	NA	-1.26887	NA	NA	NA	NA	NA	NA	NA	NA	NA		Cetuximab core Gene Group
TMEM133	NA	NA	NA	NA	NA	NA	-1.11953	NA	NA	NA	NA	NA	NA	NA	NA	NA		Cetuximab core Gene Group
TMEM140	NA	NA	NA	NA	NA	NA	-2.48472	-2.299	-2.38095	NA	NA	NA	1.87757	NA	NA	NA		Cetuximab core Gene Group	Erlotinib core gene group
TMEM25	NA	NA	NA	NA	NA	NA	-1.11937	-1.02831	NA	NA	NA	NA	NA	NA	NA	NA		Cetuximab core Gene Group	Erlotinib core gene group
TMEM256	NA	NA	NA	NA	NA	NA	-1.13974	NA	NA	NA	NA	NA	NA	NA	NA	NA		Cetuximab core Gene Group
TMEM37	NA	NA	NA	NA	NA	NA	-4.48293	-5.04794	NA	NA	NA	NA	NA	NA	NA	NA		Cetuximab core Gene Group	Erlotinib core gene group
TNFRSF14	NA	NA	NA	NA	NA	NA	-3.23926	-2.90056	-3.33196	NA	NA	NA	NA	NA	NA	-4.10961		Cetuximab core Gene Group	Erlotinib core gene group
TNRC18P1	NA	NA	NA	NA	NA	NA	-2.36574	NA	NA	NA	NA	NA	NA	NA	NA	NA		Cetuximab core Gene Group
TOB1-AS1	NA	NA	NA	NA	NA	NA	-2.17966	-1.65319	-1.98294	NA	NA	NA	NA	NA	NA	NA		Cetuximab core Gene Group	Erlotinib core gene group
TOMM40	NA	NA	NA	NA	NA	NA	1.09783	1.35572	1.4129	NA	NA	NA	NA	NA	NA	NA		Cetuximab core Gene Group	Erlotinib core gene group
TOX2	NA	NA	NA	NA	NA	NA	1.16622	2.12549	1.66795	1.68365	NA	NA	NA	1.50261	NA	NA		Cetuximab core Gene Group
TP53INP2	NA	NA	NA	NA	NA	NA	-1.41629	-1.57122	-1.79914	NA	NA	NA	NA	NA	NA	NA		Cetuximab core Gene Group	Erlotinib core gene group
TPTE2P1	NA	NA	NA	NA	NA	NA	-1.88114	NA	NA	NA	NA	NA	NA	NA	NA	NA		Cetuximab core Gene Group
TSPAN1	NA	NA	NA	NA	NA	NA	-1.58348	NA	NA	NA	NA	NA	NA	NA	NA	-2.04873		Cetuximab core Gene Group
TSPAN10	NA	NA	NA	NA	NA	NA	-1.19932	NA	NA	NA	NA	NA	NA	NA	NA	NA		Cetuximab core Gene Group
TTBK1	NA	NA	NA	NA	NA	NA	-3.45297	NA	NA	NA	NA	NA	NA	NA	NA	NA		Cetuximab core Gene Group
TTC30A	NA	NA	NA	NA	NA	NA	-1.00628	-1.246	-1.15299	NA	-1.27769	NA	NA	NA	NA	NA		Cetuximab core Gene Group	Erlotinib core gene group
TTC30B	NA	NA	NA	NA	NA	NA	-1.08609	-1.32638	-1.33232	NA	-1.36375	NA	NA	NA	NA	NA		Cetuximab core Gene Group	Erlotinib core gene group
TTC39A	NA	NA	NA	NA	NA	NA	-1.87268	NA	NA	NA	NA	NA	NA	NA	NA	NA		Cetuximab core Gene Group
TTLL1	NA	NA	NA	NA	NA	NA	-2.07822	-2.45928	-2.6896	NA	NA	NA	NA	NA	NA	NA		Cetuximab core Gene Group	Erlotinib core gene group
TWNK	NA	NA	NA	NA	NA	NA	1.10153	1.8381	1.49393	NA	1.31383	NA	NA	NA	NA	NA		Cetuximab core Gene Group	Erlotinib core gene group
UPK3B	NA	NA	NA	NA	NA	NA	-2.76451	-2.34267	NA	NA	NA	NA	NA	NA	NA	NA		Cetuximab core Gene Group	Erlotinib core gene group
USH1G	NA	NA	NA	NA	NA	NA	-5.22776	NA	NA	NA	NA	NA	NA	NA	NA	NA		Cetuximab core Gene Group
USP2-AS1	NA	NA	NA	NA	NA	NA	1.88809	2.42515	2.0092	NA	NA	NA	NA	NA	NA	NA		Cetuximab core Gene Group	Erlotinib core gene group
VEGFB	NA	NA	NA	NA	NA	NA	-1.04912	NA	NA	NA	NA	NA	NA	NA	NA	NA		Cetuximab core Gene Group
VEGFC	NA	NA	NA	NA	NA	NA	1.55417	2.07737	1.49397	NA	3.4877	NA	-1.33661	NA	NA	-1.99433		Cetuximab core Gene Group	Erlotinib core gene group
VEPH1	NA	NA	NA	NA	NA	NA	-1.58306	-2.13978	-1.71557	NA	NA	NA	1.22731	NA	NA	NA		Cetuximab core Gene Group	Erlotinib core gene group
VWA2	NA	NA	NA	NA	NA	NA	-3.02456	-3.39979	-3.26432	NA	NA	NA	NA	NA	NA	NA		Cetuximab core Gene Group	Erlotinib core gene group
VWA8-AS1	NA	NA	NA	NA	NA	NA	-1.78624	-1.59966	NA	NA	NA	NA	NA	NA	NA	NA		Cetuximab core Gene Group	Erlotinib core gene group
WTAPP1	NA	NA	NA	NA	NA	NA	-3.10939	NA	NA	NA	NA	NA	NA	NA	NA	NA		Cetuximab core Gene Group
YPEL3	NA	NA	NA	NA	NA	NA	-1.81385	-1.74058	-1.52564	NA	NA	NA	NA	NA	NA	NA		Cetuximab core Gene Group	Erlotinib core gene group
ZNF185	NA	NA	NA	NA	NA	NA	-1.15957	NA	NA	NA	NA	NA	NA	NA	NA	NA		Cetuximab core Gene Group
ZNF19	NA	NA	NA	NA	NA	NA	-1.0714	NA	-1.0244	NA	NA	NA	NA	NA	NA	NA		Cetuximab core Gene Group
ZNF235	NA	NA	NA	NA	NA	NA	-1.01538	NA	NA	NA	NA	NA	NA	NA	NA	NA		Cetuximab core Gene Group
ZNF396	NA	NA	NA	NA	NA	NA	-1.76207	-1.54909	-1.88527	NA	NA	NA	NA	NA	NA	NA		Cetuximab core Gene Group	Erlotinib core gene group
ZNF449	NA	NA	NA	NA	NA	NA	-1.02556	-1.01701	-1.21062	NA	NA	NA	NA	NA	NA	NA		Cetuximab core Gene Group	Erlotinib core gene group
ZNF485	NA	NA	NA	NA	NA	NA	1.21952	1.39208	NA	NA	NA	NA	NA	NA	NA	NA		Cetuximab core Gene Group	Erlotinib core gene group
ZNF554	NA	NA	NA	NA	NA	NA	-1.53537	-1.59072	-1.83471	NA	-1.80035	NA	NA	NA	NA	NA		Cetuximab core Gene Group	Erlotinib core gene group
ZNF792	NA	NA	NA	NA	NA	NA	-1.0584	NA	-1.25262	NA	NA	NA	NA	NA	NA	NA		Cetuximab core Gene Group
ZSCAN12P1	NA	NA	NA	NA	NA	NA	1.34977	NA	NA	NA	NA	NA	NA	NA	NA	NA		Cetuximab core Gene Group
ABCA13	NA	NA	NA	NA	NA	NA	NA	2.37549	1.89416	NA	2.3229	NA	NA	NA	NA	NA			Erlotinib core gene group
ACER3	NA	NA	NA	NA	NA	NA	NA	NA	NA	NA	1.32464	NA	NA	NA	NA	NA
ACVR2B-AS1	NA	NA	NA	NA	NA	NA	NA	-1.39393	-1.66212	NA	-1.86616	NA	NA	NA	NA	NA			Erlotinib core gene group
ADAM19	NA	NA	NA	NA	NA	NA	NA	1.9537	1.2917	1.49514	1.77563	NA	NA	1.43422	NA	NA
ADM2	NA	NA	NA	NA	NA	NA	NA	5.17014	NA	NA	3.1805	NA	NA	NA	NA	NA			Erlotinib core gene group
AGO2	NA	NA	NA	NA	NA	NA	NA	1.03913	1.13558	NA	1.119	NA	NA	NA	NA	NA			Erlotinib core gene group
AHRR	NA	NA	NA	NA	NA	NA	NA	-1.549	-1.43826	NA	-3.10211	NA	NA	NA	NA	NA			Erlotinib core gene group
ALDH5A1	NA	NA	NA	NA	NA	NA	NA	NA	NA	NA	-1.1233	NA	NA	NA	NA	NA
APOLD1	NA	NA	NA	NA	NA	NA	NA	NA	NA	NA	-1.42725	NA	NA	NA	NA	NA
ARHGEF9	NA	NA	NA	NA	NA	NA	NA	NA	NA	NA	-1.1669	NA	NA	NA	NA	NA
ARNTL2	NA	NA	NA	NA	NA	NA	NA	NA	NA	NA	2.25482	NA	NA	NA	NA	NA
ARPIN	NA	NA	NA	NA	NA	NA	NA	NA	NA	NA	-1.41989	NA	NA	NA	NA	NA
ATP13A3	NA	NA	NA	NA	NA	NA	NA	NA	NA	NA	1.02403	NA	NA	NA	NA	NA
ATP1A1-AS1	NA	NA	NA	NA	NA	NA	NA	NA	NA	NA	-1.06546	NA	NA	NA	NA	NA
BACE1	NA	NA	NA	NA	NA	NA	NA	NA	NA	NA	-1.21949	NA	NA	NA	NA	NA
BBS9	NA	NA	NA	NA	NA	NA	NA	-1.03306	-1.08355	NA	-1.05596	NA	NA	NA	NA	NA			Erlotinib core gene group
BCAM	NA	NA	NA	NA	NA	NA	NA	-1.06792	NA	NA	-1.41934	NA	NA	NA	NA	NA			Erlotinib core gene group
BCAR3	NA	NA	NA	NA	NA	NA	NA	NA	NA	NA	1.45719	NA	NA	NA	NA	NA
BEND6	NA	NA	NA	NA	NA	NA	NA	NA	NA	NA	-2.14035	NA	NA	-1.30999	NA	NA
BHLHB9	NA	NA	NA	NA	NA	NA	NA	NA	NA	NA	-1.16636	NA	NA	NA	NA	NA
BLVRB	NA	NA	NA	NA	NA	NA	NA	-1.04145	NA	NA	-1.00608	NA	NA	NA	NA	NA			Erlotinib core gene group
C15orf52	NA	NA	NA	NA	NA	NA	NA	NA	NA	NA	1.47002	NA	NA	NA	NA	-1.20911
C16orf52	NA	NA	NA	NA	NA	NA	NA	NA	NA	NA	1.41516	NA	NA	NA	NA	NA
C9orf16	NA	NA	NA	NA	NA	NA	NA	NA	NA	NA	-1.31024	NA	NA	NA	NA	NA
CALB1	NA	NA	NA	NA	NA	NA	NA	NA	NA	NA	6.8513	NA	NA	NA	NA	-6.21341
CAMK2N2	NA	NA	NA	NA	NA	NA	NA	NA	NA	NA	-1.13727	NA	NA	NA	NA	NA
CAPRIN2	NA	NA	NA	NA	NA	NA	NA	1.20097	NA	1.32901	1.14339	NA	NA	1.3622	NA	NA
CCDC171	NA	NA	NA	NA	NA	NA	NA	NA	NA	NA	-1.07978	NA	NA	NA	NA	NA
CCDC30	NA	NA	NA	NA	NA	NA	NA	-1.1792	-1.34497	NA	-1.55807	NA	NA	NA	NA	NA			Erlotinib core gene group
CCNE1	NA	NA	NA	NA	NA	NA	NA	NA	NA	NA	1.38048	NA	NA	NA	NA	NA
CCT6B	NA	NA	NA	NA	NA	NA	NA	-1.28549	-1.77842	NA	-1.90117	NA	NA	NA	NA	NA			Erlotinib core gene group
CD163L1	NA	NA	NA	NA	NA	NA	NA	NA	NA	NA	3.89216	NA	NA	NA	NA	NA
CD99L2	NA	NA	NA	NA	NA	NA	NA	-1.06393	-1.05392	NA	-1.09076	NA	NA	NA	NA	NA			Erlotinib core gene group
CDC25A	NA	NA	NA	NA	NA	NA	NA	1.12419	1.05133	NA	1.0408	NA	NA	NA	NA	NA			Erlotinib core gene group
CDCP1	NA	NA	NA	NA	NA	NA	NA	NA	NA	NA	2.18843	NA	NA	NA	NA	NA
CHAC1	NA	NA	NA	NA	NA	NA	NA	2.79157	3.06973	NA	2.15285	NA	NA	NA	NA	NA			Erlotinib core gene group
CHORDC1	NA	NA	NA	NA	NA	NA	NA	NA	NA	NA	1.10385	NA	NA	NA	NA	NA
CLDN4	NA	NA	NA	NA	NA	NA	NA	NA	NA	NA	1.51568	NA	NA	NA	NA	NA
CLYBL	NA	NA	NA	NA	NA	NA	NA	-1.36861	-1.48494	NA	-2.10466	NA	NA	NA	NA	NA			Erlotinib core gene group
COA6	NA	NA	NA	NA	NA	NA	NA	NA	NA	NA	1.00117	NA	NA	NA	NA	NA
COL17A1	NA	NA	NA	NA	NA	NA	NA	NA	NA	NA	2.5559	NA	NA	NA	NA	NA
CRYL1	NA	NA	NA	NA	NA	NA	NA	-1.16347	-1.10566	NA	-1.24814	NA	NA	NA	NA	NA			Erlotinib core gene group
CTPS1	NA	NA	NA	NA	NA	NA	NA	1.29127	1.04583	NA	1.01972	NA	NA	NA	NA	NA			Erlotinib core gene group
CXCL8	NA	NA	NA	NA	NA	NA	NA	NA	NA	NA	3.74422	NA	NA	NA	NA	NA
CYP1B1	NA	NA	NA	NA	NA	NA	NA	-2.03696	NA	NA	-4.22489	NA	NA	-2.38393	NA	2.76458			Erlotinib core gene group
CYP1B1-AS1	NA	NA	NA	NA	NA	NA	NA	NA	NA	NA	-2.05037	NA	NA	NA	NA	NA
DCBLD2	NA	NA	NA	NA	NA	NA	NA	NA	NA	NA	1.36168	NA	NA	NA	NA	NA
DDX21	NA	NA	NA	NA	NA	NA	NA	1.21745	1.28666	NA	1.24567	NA	NA	NA	NA	NA			Erlotinib core gene group
DNAL4	NA	NA	NA	NA	NA	NA	NA	NA	NA	NA	-1.13112	NA	NA	NA	NA	NA
E2F7	NA	NA	NA	NA	NA	NA	NA	NA	NA	NA	1.06201	NA	NA	NA	NA	NA
ECM1	NA	NA	NA	NA	NA	NA	NA	NA	NA	NA	4.64381	NA	NA	NA	NA	-4.13751
EDARADD	NA	NA	NA	NA	NA	NA	NA	-1.04071	NA	NA	-1.12144	NA	NA	NA	NA	NA			Erlotinib core gene group
EFNA5	NA	NA	NA	NA	NA	NA	NA	NA	NA	NA	-1.24926	NA	NA	NA	NA	NA
EFNB2	NA	NA	NA	NA	NA	NA	NA	NA	NA	NA	1.04772	NA	NA	NA	NA	NA
EHHADH	NA	NA	NA	NA	NA	NA	NA	-1.15765	NA	NA	-1.02191	NA	NA	NA	NA	NA			Erlotinib core gene group
EIF5A2	NA	NA	NA	NA	NA	NA	NA	NA	1.14341	NA	1.4961	NA	NA	NA	NA	NA
EIF6	NA	NA	NA	NA	NA	NA	NA	NA	NA	NA	1.09438	NA	NA	NA	NA	NA
ENO1-IT1	NA	NA	NA	NA	NA	NA	NA	1.44552	NA	NA	1.39617	NA	NA	NA	NA	NA			Erlotinib core gene group
EPHX2	NA	NA	NA	NA	NA	NA	NA	-1.11664	NA	NA	-1.65726	NA	NA	NA	NA	NA			Erlotinib core gene group
EVI5L	NA	NA	NA	NA	NA	NA	NA	NA	NA	NA	-1.09749	NA	NA	NA	NA	NA
FAM120C	NA	NA	NA	NA	NA	NA	NA	NA	NA	NA	-1.65099	NA	NA	NA	NA	NA
FAM66C	NA	NA	NA	NA	NA	NA	NA	-1.33001	-1.84624	NA	-2.51011	NA	NA	NA	NA	NA			Erlotinib core gene group
FAM83G	NA	NA	NA	NA	NA	NA	NA	1.06136	NA	NA	1.09813	NA	NA	NA	NA	NA			Erlotinib core gene group
FBXL19-AS1	NA	NA	NA	NA	NA	NA	NA	NA	NA	NA	1.12281	NA	NA	NA	NA	NA
FBXW4	NA	NA	NA	NA	NA	NA	NA	NA	NA	NA	-1.38965	NA	NA	NA	NA	NA
FHOD1	NA	NA	NA	NA	NA	NA	NA	1.03735	NA	NA	1.15125	NA	NA	NA	NA	NA			Erlotinib core gene group
FKBP9	NA	NA	NA	NA	NA	NA	NA	NA	NA	NA	-1.01811	NA	NA	NA	NA	NA
FLNB	NA	NA	NA	NA	NA	NA	NA	NA	NA	NA	1.96031	NA	NA	NA	NA	NA
FOSB	NA	NA	NA	NA	NA	NA	NA	NA	NA	NA	-2.90541	NA	NA	NA	NA	2.33048
FST	NA	NA	NA	NA	NA	NA	NA	2.09832	1.94532	NA	5.28783	NA	-2.41273	1.69658	-1.98393	NA			Erlotinib core gene group
FTSJ1	NA	NA	NA	NA	NA	NA	NA	NA	NA	NA	1.01069	NA	NA	NA	NA	NA
FUT4	NA	NA	NA	NA	NA	NA	NA	1.08181	1.05077	NA	1.178	NA	NA	NA	NA	NA			Erlotinib core gene group
FZD1	NA	NA	NA	NA	NA	NA	NA	NA	NA	NA	-1.234	NA	NA	NA	NA	NA
G6PD	NA	NA	NA	NA	NA	NA	NA	NA	NA	NA	-1.51544	NA	NA	NA	NA	NA
GAS6	NA	NA	NA	NA	NA	NA	NA	NA	1.01557	NA	1.07495	NA	NA	NA	NA	NA
GATA6	NA	NA	NA	NA	NA	NA	NA	NA	NA	NA	-1.47967	NA	NA	NA	NA	NA
GJA1	NA	NA	NA	NA	NA	NA	NA	NA	1.01177	NA	1.27611	NA	NA	NA	NA	NA
GLIPR1	NA	NA	NA	NA	NA	NA	NA	1.14028	1.21275	NA	1.70968	NA	NA	NA	NA	NA			Erlotinib core gene group
GLIPR2	NA	NA	NA	NA	NA	NA	NA	NA	NA	NA	-1.12097	NA	NA	NA	NA	NA
GPX4	NA	NA	NA	NA	NA	NA	NA	NA	NA	NA	-1.28411	NA	NA	NA	NA	NA
GRPEL1	NA	NA	NA	NA	NA	NA	NA	NA	NA	NA	1.00794	NA	NA	NA	NA	NA
GTPBP4	NA	NA	NA	NA	NA	NA	NA	1.0196	1.02003	NA	1.09575	NA	NA	NA	NA	NA			Erlotinib core gene group
H6PD	NA	NA	NA	NA	NA	NA	NA	NA	NA	NA	-1.33241	NA	NA	NA	NA	NA
HAS3	NA	NA	NA	NA	NA	NA	NA	NA	NA	NA	1.63528	NA	NA	NA	NA	NA
HEPHL1	NA	NA	NA	NA	NA	NA	NA	NA	NA	NA	11.3545	NA	NA	NA	NA	-10.9272
HERC2P4	NA	NA	NA	NA	NA	NA	NA	-1.30608	-1.57035	NA	-1.41436	NA	NA	NA	NA	NA			Erlotinib core gene group
HHLA3	NA	NA	NA	NA	NA	NA	NA	NA	NA	NA	-1.11657	NA	NA	NA	NA	NA
HMOX2	NA	NA	NA	NA	NA	NA	NA	NA	NA	NA	1.0154	NA	NA	NA	NA	NA
HOXC13-AS	NA	NA	NA	NA	NA	NA	NA	-1.5071	-1.20742	NA	-1.84307	NA	1.14277	-1.17007	NA	NA			Erlotinib core gene group
HSD17B11	NA	NA	NA	NA	NA	NA	NA	NA	NA	NA	-1.09831	NA	NA	NA	NA	NA
HSD17B2	NA	NA	NA	NA	NA	NA	NA	NA	NA	NA	5.92318	NA	NA	NA	NA	-5.25845
HSPA8	NA	NA	NA	NA	NA	NA	NA	NA	NA	NA	1.11313	NA	NA	NA	NA	NA
HSPH1	NA	NA	NA	NA	NA	NA	NA	NA	NA	NA	1.00988	NA	NA	NA	NA	NA
HTR7	NA	NA	NA	NA	NA	NA	NA	NA	1.04878	NA	1.44641	NA	NA	1.10598	NA	NA
HYI	NA	NA	NA	NA	NA	NA	NA	NA	NA	NA	2.05231	NA	NA	NA	NA	NA
HYKK	NA	NA	NA	NA	NA	NA	NA	NA	NA	NA	-1.07979	NA	NA	NA	NA	NA
ICK	NA	NA	NA	NA	NA	NA	NA	NA	NA	NA	-1.16386	NA	NA	NA	NA	NA
IGFN1	NA	NA	NA	NA	NA	NA	NA	3.5896	NA	NA	7.17642	NA	NA	2.9166	NA	NA			Erlotinib core gene group
IL13RA2	NA	NA	NA	NA	NA	NA	NA	NA	NA	NA	11.1667	NA	NA	NA	NA	NA
IL1R2	NA	NA	NA	NA	NA	NA	NA	NA	NA	NA	11.3945	NA	NA	NA	NA	-8.07184
IL1RAPL1	NA	NA	NA	NA	NA	NA	NA	NA	NA	NA	6.02592	NA	NA	NA	NA	-3.17979
IL7R	NA	NA	NA	NA	NA	NA	NA	2.26607	NA	NA	6.28554	NA	NA	NA	NA	-3.94663			Erlotinib core gene group
INPP4B	NA	NA	NA	NA	NA	NA	NA	1.26485	1.10789	NA	1.70404	NA	NA	NA	NA	NA			Erlotinib core gene group
IRAK2	NA	NA	NA	NA	NA	NA	NA	2.52809	NA	NA	4.05353	NA	NA	1.81493	NA	NA			Erlotinib core gene group
ITGA6	NA	NA	NA	NA	NA	NA	NA	NA	NA	NA	1.57003	NA	NA	NA	NA	NA
ITGB2	NA	NA	NA	NA	NA	NA	NA	NA	NA	NA	3.88354	NA	-2.44207	NA	NA	NA
JDP2	NA	NA	NA	NA	NA	NA	NA	NA	NA	NA	-1.21798	NA	NA	NA	NA	NA
KBTBD8	NA	NA	NA	NA	NA	NA	NA	NA	1.37556	NA	1.54338	NA	NA	NA	NA	NA
KCNMB4	NA	NA	NA	NA	NA	NA	NA	-1.29986	NA	NA	-2.66042	NA	NA	-1.94243	NA	NA			Erlotinib core gene group
KCTD7	NA	NA	NA	NA	NA	NA	NA	NA	NA	NA	-1.00179	NA	NA	NA	NA	NA
KIAA1755	NA	NA	NA	NA	NA	NA	NA	NA	NA	NA	4.80268	NA	NA	NA	NA	NA
KIF17	NA	NA	NA	NA	NA	NA	NA	3.28293	NA	2.54159	5.13477	NA	NA	2.69409	NA	NA
KRT14	NA	NA	NA	NA	NA	NA	NA	2.09463	2.95978	NA	5.10297	NA	NA	NA	NA	NA			Erlotinib core gene group
LAMA4	NA	NA	NA	NA	NA	NA	NA	-1.01192	-1.46584	NA	-2.63678	NA	1.38512	NA	NA	NA			Erlotinib core gene group
LCK	NA	NA	NA	NA	NA	NA	NA	NA	NA	NA	4.06111	NA	NA	NA	NA	NA
LDHA	NA	NA	NA	NA	NA	NA	NA	NA	NA	NA	1.098	NA	NA	NA	NA	NA
LDLR	NA	NA	NA	NA	NA	NA	NA	NA	NA	NA	1.90078	NA	NA	NA	NA	NA
LIMA1	NA	NA	NA	NA	NA	NA	NA	NA	NA	NA	2.22615	NA	NA	NA	NA	NA
LINC00339	NA	NA	NA	NA	NA	NA	NA	NA	NA	NA	-1.38603	NA	NA	NA	NA	NA
LINC00472	NA	NA	NA	NA	NA	NA	NA	NA	NA	NA	1.74698	NA	NA	NA	NA	NA
LINC00886	NA	NA	NA	NA	NA	NA	NA	NA	-1.07108	NA	-1.40735	NA	NA	NA	NA	NA
LINC00963	NA	NA	NA	NA	NA	NA	NA	NA	NA	NA	-1.37056	NA	NA	NA	NA	NA
LINC00973	NA	NA	NA	NA	NA	NA	NA	NA	NA	NA	6.15404	NA	NA	NA	NA	NA
LINC01220	NA	NA	NA	NA	NA	NA	NA	-1.88691	-2.11925	NA	-2.58881	NA	NA	NA	NA	NA			Erlotinib core gene group
LINC01322	NA	NA	NA	NA	NA	NA	NA	NA	NA	NA	2.65962	NA	NA	NA	NA	-2.18895
LINC02029	NA	NA	NA	NA	NA	NA	NA	NA	-2.44118	NA	-2.48697	NA	NA	NA	NA	NA
LPIN1	NA	NA	NA	NA	NA	NA	NA	NA	NA	NA	1.25995	NA	NA	NA	NA	NA
LRRC23	NA	NA	NA	NA	NA	NA	NA	NA	NA	NA	-1.74684	NA	NA	NA	NA	NA
LRRC69	NA	NA	NA	NA	NA	NA	NA	NA	NA	NA	1.50086	NA	NA	NA	NA	NA
LYPLA1	NA	NA	NA	NA	NA	NA	NA	NA	NA	NA	1.0139	NA	NA	NA	NA	NA
MAGI2	NA	NA	NA	NA	NA	NA	NA	NA	-1.15733	NA	-1.51274	NA	NA	NA	NA	NA
MAP1A	NA	NA	NA	NA	NA	NA	NA	NA	NA	NA	-1.61922	NA	NA	NA	NA	NA
MAP2K3	NA	NA	NA	NA	NA	NA	NA	NA	NA	NA	1.21495	NA	NA	NA	NA	NA
MC1R	NA	NA	NA	NA	NA	NA	NA	NA	-1.15781	NA	-1.02657	NA	NA	NA	NA	NA
MCTP1	NA	NA	NA	NA	NA	NA	NA	NA	NA	NA	1.10616	NA	NA	NA	NA	NA
MILR1	NA	NA	NA	NA	NA	NA	NA	2.22441	1.65757	NA	1.91551	NA	NA	1.78217	NA	NA			Erlotinib core gene group
MITF	NA	NA	NA	NA	NA	NA	NA	-1.23549	NA	NA	-1.31669	NA	NA	NA	NA	NA			Erlotinib core gene group
MPHOSPH6	NA	NA	NA	NA	NA	NA	NA	NA	NA	NA	1.02469	NA	NA	NA	NA	NA
MT-RNR1	NA	NA	NA	NA	NA	NA	NA	NA	NA	NA	-2.22072	NA	NA	NA	NA	NA
MXD3	NA	NA	NA	NA	NA	NA	NA	NA	-1.19988	NA	-1.29263	NA	NA	NA	NA	NA
NAMPT	NA	NA	NA	NA	NA	NA	NA	NA	NA	NA	1.25981	NA	NA	NA	NA	NA
NAMPTP1	NA	NA	NA	NA	NA	NA	NA	1.18231	1.17286	NA	1.47014	NA	NA	NA	NA	NA			Erlotinib core gene group
NBPF20	NA	NA	NA	NA	NA	NA	NA	1.06029	1.01676	1.035	1.20871	NA	NA	NA	NA	NA
NBPF9	NA	NA	NA	NA	NA	NA	NA	NA	NA	NA	1.07005	NA	NA	NA	NA	NA
NCR3LG1	NA	NA	NA	NA	NA	NA	NA	NA	NA	NA	1.12598	NA	NA	NA	NA	NA
NIP7	NA	NA	NA	NA	NA	NA	NA	NA	1.19174	NA	1.01028	NA	NA	NA	NA	NA
NLRP3P1	NA	NA	NA	NA	NA	NA	NA	1.65277	NA	NA	1.59139	NA	NA	1.34647	NA	NA			Erlotinib core gene group
NPR2	NA	NA	NA	NA	NA	NA	NA	NA	NA	NA	1.61259	NA	NA	NA	NA	NA
NQO1	NA	NA	NA	NA	NA	NA	NA	NA	NA	NA	-1.07862	NA	NA	NA	NA	NA
NR4A2	NA	NA	NA	NA	NA	NA	NA	-1.4074	-1.22127	NA	-1.86737	NA	NA	NA	NA	NA			Erlotinib core gene group
NUDCD1	NA	NA	NA	NA	NA	NA	NA	NA	NA	NA	1.17315	NA	NA	NA	NA	NA
NUPR1	NA	NA	NA	NA	NA	NA	NA	NA	NA	NA	-2.02574	NA	NA	NA	NA	NA
NUTM2D	NA	NA	NA	NA	NA	NA	NA	-1.62478	NA	NA	-2.61596	NA	NA	NA	NA	NA			Erlotinib core gene group
P2RX5	NA	NA	NA	NA	NA	NA	NA	1.56126	1.33306	NA	1.52369	NA	NA	NA	NA	NA			Erlotinib core gene group
PAIP2B	NA	NA	NA	NA	NA	NA	NA	NA	NA	NA	-1.2785	NA	NA	NA	NA	NA
PAQR8	NA	NA	NA	NA	NA	NA	NA	NA	NA	NA	-1.737	NA	NA	NA	NA	NA
PAXIP1-AS2	NA	NA	NA	NA	NA	NA	NA	-1.28522	-1.14308	NA	-1.55313	NA	NA	NA	NA	NA			Erlotinib core gene group
PFKFB3	NA	NA	NA	NA	NA	NA	NA	-1.2823	-1.16109	NA	-1.35316	NA	NA	NA	NA	NA			Erlotinib core gene group
PGAP3	NA	NA	NA	NA	NA	NA	NA	NA	NA	NA	-1.18409	NA	NA	NA	NA	NA
PHC2	NA	NA	NA	NA	NA	NA	NA	NA	NA	NA	1.10453	NA	NA	NA	NA	NA
PHLDA1	NA	NA	NA	NA	NA	NA	NA	1.31972	1.36202	NA	1.70297	NA	NA	1.14008	NA	NA			Erlotinib core gene group
PIK3C2B	NA	NA	NA	NA	NA	NA	NA	NA	NA	NA	-1.84512	NA	NA	NA	NA	NA
PLEKHH3	NA	NA	NA	NA	NA	NA	NA	NA	NA	NA	-1.06796	NA	NA	NA	NA	NA
PLXNA1	NA	NA	NA	NA	NA	NA	NA	NA	1.01234	NA	1.36536	NA	NA	NA	NA	NA
PNP	NA	NA	NA	NA	NA	NA	NA	NA	NA	NA	1.14734	NA	NA	NA	NA	NA
PNPT1	NA	NA	NA	NA	NA	NA	NA	NA	NA	NA	1.03841	NA	NA	NA	NA	NA
PRDM1	NA	NA	NA	NA	NA	NA	NA	NA	NA	NA	6.88923	NA	NA	NA	NA	-5.83286
PSMD5-AS1	NA	NA	NA	NA	NA	NA	NA	NA	NA	NA	-1.19354	NA	NA	NA	NA	NA
PXMP4	NA	NA	NA	NA	NA	NA	NA	-1.26879	-1.02001	NA	-1.41461	NA	NA	-1.13813	NA	NA			Erlotinib core gene group
RABL2B	NA	NA	NA	NA	NA	NA	NA	NA	NA	NA	-1.07779	NA	NA	NA	NA	NA
RAPH1	NA	NA	NA	NA	NA	NA	NA	NA	1.04893	NA	1.34558	NA	NA	NA	NA	NA
RBM43	NA	NA	NA	NA	NA	NA	NA	NA	NA	NA	-1.21801	NA	NA	NA	NA	NA
RHEBL1	NA	NA	NA	NA	NA	NA	NA	1.39881	NA	NA	2.51841	NA	NA	NA	NA	NA			Erlotinib core gene group
RHOU	NA	NA	NA	NA	NA	NA	NA	-1.24513	-1.12782	NA	-1.11798	NA	NA	NA	NA	NA			Erlotinib core gene group
RN7SL734P	NA	NA	NA	NA	NA	NA	NA	4.95201	NA	NA	3.24311	NA	NA	3.43198	NA	NA			Erlotinib core gene group
RNASET2	NA	NA	NA	NA	NA	NA	NA	NA	-1.07406	NA	-1.26971	NA	NA	NA	NA	NA
RNU6-10P	NA	NA	NA	NA	NA	NA	NA	NA	NA	NA	5.26327	NA	NA	NA	NA	NA
RPL5P13	NA	NA	NA	NA	NA	NA	NA	NA	NA	NA	4.75514	NA	NA	NA	NA	NA
RPS14P4	NA	NA	NA	NA	NA	NA	NA	2.28501	NA	NA	3.63012	NA	NA	NA	NA	NA			Erlotinib core gene group
S100A14	NA	NA	NA	NA	NA	NA	NA	NA	NA	NA	1.08163	NA	NA	NA	NA	NA
SBDS	NA	NA	NA	NA	NA	NA	NA	NA	NA	NA	1.14372	NA	NA	NA	NA	NA
SELL	NA	NA	NA	NA	NA	NA	NA	-2.08495	-2.16637	NA	-3.62371	NA	NA	NA	NA	NA			Erlotinib core gene group
SENP3	NA	NA	NA	NA	NA	NA	NA	NA	1.09224	NA	1.00838	NA	NA	NA	NA	NA
SERPINB2	NA	NA	NA	NA	NA	NA	NA	NA	NA	NA	27.0646	NA	NA	NA	NA	-10.0954
SIAE	NA	NA	NA	NA	NA	NA	NA	NA	-1.02042	NA	-1.13684	NA	NA	NA	NA	NA
SKIDA1	NA	NA	NA	NA	NA	NA	NA	-1.11038	-1.27907	-1.10212	-2.02185	NA	NA	NA	NA	NA
SLC24A1	NA	NA	NA	NA	NA	NA	NA	NA	NA	NA	-1.40919	NA	NA	NA	NA	NA
SLC7A5P1	NA	NA	NA	NA	NA	NA	NA	1.90948	NA	NA	1.83678	NA	NA	NA	NA	NA			Erlotinib core gene group
SLC9A3-AS1	NA	NA	NA	NA	NA	NA	NA	NA	-1.83118	NA	-1.78541	NA	NA	NA	NA	NA
SLC9A3R2	NA	NA	NA	NA	NA	NA	NA	1.38101	NA	NA	3.97069	NA	NA	NA	NA	-2.99252			Erlotinib core gene group
SMARCA2	NA	NA	NA	NA	NA	NA	NA	NA	NA	NA	-1.01846	NA	NA	NA	NA	NA
SMCO2	NA	NA	NA	NA	NA	NA	NA	NA	NA	NA	3.421	NA	NA	NA	NA	NA
SNN	NA	NA	NA	NA	NA	NA	NA	-1.11121	NA	NA	-1.44223	NA	NA	NA	NA	NA			Erlotinib core gene group
SNX18P7	NA	NA	NA	NA	NA	NA	NA	1.002	NA	NA	1.27019	NA	NA	NA	NA	NA			Erlotinib core gene group
SNX21	NA	NA	NA	NA	NA	NA	NA	NA	-1.13731	NA	-1.10529	NA	NA	NA	NA	NA
SOCS2	NA	NA	NA	NA	NA	NA	NA	NA	NA	NA	2.25668	NA	NA	NA	NA	NA
SPACA9	NA	NA	NA	NA	NA	NA	NA	NA	NA	NA	-1.59464	NA	NA	NA	NA	NA
SPSB2	NA	NA	NA	NA	NA	NA	NA	NA	-1.07597	NA	-1.26785	NA	NA	NA	NA	NA
SRR	NA	NA	NA	NA	NA	NA	NA	NA	-1.00124	NA	-1.48676	NA	NA	NA	NA	NA
SSFA2	NA	NA	NA	NA	NA	NA	NA	NA	NA	NA	1.09353	NA	NA	NA	NA	NA
SSH1	NA	NA	NA	NA	NA	NA	NA	NA	NA	NA	1.36067	NA	NA	NA	NA	NA
STK40	NA	NA	NA	NA	NA	NA	NA	NA	NA	NA	1.02161	NA	NA	NA	NA	NA
STMN3	NA	NA	NA	NA	NA	NA	NA	NA	2.27075	NA	2.60431	NA	NA	NA	NA	NA
SUOX	NA	NA	NA	NA	NA	NA	NA	NA	NA	NA	-1.07519	NA	NA	NA	NA	NA
TEF	NA	NA	NA	NA	NA	NA	NA	NA	NA	NA	-1.06712	NA	NA	NA	NA	NA
TFDP2	NA	NA	NA	NA	NA	NA	NA	NA	NA	NA	-1.08	NA	NA	NA	NA	NA
TLN2	NA	NA	NA	NA	NA	NA	NA	-1.01139	-1.17786	NA	-1.55171	NA	NA	NA	NA	NA			Erlotinib core gene group
TMC7	NA	NA	NA	NA	NA	NA	NA	1.03889	NA	1.02456	1.84359	NA	NA	NA	NA	NA
TPRN	NA	NA	NA	NA	NA	NA	NA	1.38428	1.15485	NA	1.10399	NA	NA	NA	NA	NA			Erlotinib core gene group
TRIM16L	NA	NA	NA	NA	NA	NA	NA	-1.02287	NA	NA	-1.61125	NA	NA	-1.16342	NA	NA			Erlotinib core gene group
TRPM2	NA	NA	NA	NA	NA	NA	NA	NA	NA	NA	1.15286	NA	NA	NA	NA	NA
TSC22D3	NA	NA	NA	NA	NA	NA	NA	NA	NA	NA	-1.80562	NA	NA	NA	NA	NA
TSPAN2	NA	NA	NA	NA	NA	NA	NA	NA	NA	NA	-1.64717	NA	NA	NA	NA	NA
TSPAN7	NA	NA	NA	NA	NA	NA	NA	NA	NA	NA	-2.01927	NA	1.23339	NA	NA	NA
TSR1	NA	NA	NA	NA	NA	NA	NA	1.21584	1.1358	NA	1.0754	NA	NA	NA	NA	NA			Erlotinib core gene group
TSTD1	NA	NA	NA	NA	NA	NA	NA	NA	NA	NA	-1.15739	NA	NA	NA	NA	NA
UAP1	NA	NA	NA	NA	NA	NA	NA	NA	NA	NA	1.22192	NA	NA	NA	NA	NA
URB2	NA	NA	NA	NA	NA	NA	NA	NA	1.16852	NA	1.06755	NA	NA	NA	NA	NA
UTP15	NA	NA	NA	NA	NA	NA	NA	NA	1.13804	NA	1.06776	NA	NA	NA	NA	NA
WDR43	NA	NA	NA	NA	NA	NA	NA	1.13567	1.12247	NA	1.13287	NA	NA	NA	NA	NA			Erlotinib core gene group
WISP2	NA	NA	NA	NA	NA	NA	NA	-3.16281	-4.1565	-3.37852	-4.19063	NA	NA	NA	NA	NA
XDH	NA	NA	NA	NA	NA	NA	NA	NA	NA	NA	2.27	NA	NA	1.27314	NA	-1.85522
ZDHHC1	NA	NA	NA	NA	NA	NA	NA	NA	NA	NA	-1.10655	NA	NA	NA	NA	NA
ZEB1	NA	NA	NA	NA	NA	NA	NA	1.20964	1.13307	1.11922	2.08342	NA	NA	NA	NA	NA
ZFP36L2	NA	NA	NA	NA	NA	NA	NA	1.00994	1.23628	NA	1.71622	NA	NA	NA	NA	NA			Erlotinib core gene group
ZFPM2-AS1	NA	NA	NA	NA	NA	NA	NA	NA	NA	NA	1.56101	NA	NA	1.0339	NA	NA
ZMYND19	NA	NA	NA	NA	NA	NA	NA	1.13292	1.33357	NA	1.12883	NA	NA	NA	NA	NA			Erlotinib core gene group
ZNF599	NA	NA	NA	NA	NA	NA	NA	-1.13889	-1.14373	NA	-1.22083	NA	NA	NA	NA	NA			Erlotinib core gene group
ZPR1	NA	NA	NA	NA	NA	NA	NA	NA	NA	NA	1.06084	NA	NA	NA	NA	NA
ABTB1	NA	NA	NA	NA	NA	NA	NA	NA	-1.22281	NA	NA	NA	NA	NA	NA	NA
ADAMTS13	NA	NA	NA	NA	NA	NA	NA	NA	-1.81027	NA	NA	NA	NA	NA	NA	NA
AGMAT	NA	NA	NA	NA	NA	NA	NA	NA	1.18829	NA	NA	NA	NA	NA	NA	NA
AHNAK2	NA	NA	NA	NA	NA	NA	NA	-1.86129	-2.0597	NA	NA	NA	NA	NA	NA	NA			Erlotinib core gene group
APH1B	NA	NA	NA	NA	NA	NA	NA	-1.29034	-1.5207	NA	NA	NA	NA	NA	NA	NA			Erlotinib core gene group
ARHGEF40	NA	NA	NA	NA	NA	NA	NA	NA	-1.22522	NA	NA	NA	NA	NA	NA	NA
ARMC6	NA	NA	NA	NA	NA	NA	NA	1.02804	1.14396	NA	NA	NA	NA	NA	NA	NA			Erlotinib core gene group
ARSA	NA	NA	NA	NA	NA	NA	NA	-1.00677	-1.00669	NA	NA	NA	NA	NA	NA	NA			Erlotinib core gene group
ASB4	NA	NA	NA	NA	NA	NA	NA	NA	-2.56113	NA	NA	NA	NA	NA	NA	NA
BCAT1	NA	NA	NA	NA	NA	NA	NA	1.03242	1.26848	NA	NA	NA	-1.05264	NA	NA	NA			Erlotinib core gene group
BDKRB2	NA	NA	NA	NA	NA	NA	NA	1.59549	1.01544	1.32981	NA	NA	NA	1.18175	NA	NA
CCDC58	NA	NA	NA	NA	NA	NA	NA	NA	1.05788	NA	NA	NA	NA	NA	NA	NA
CDH8	NA	NA	NA	NA	NA	NA	NA	NA	-1.05352	NA	NA	NA	NA	NA	NA	NA
CDKL2	NA	NA	NA	NA	NA	NA	NA	-1.02948	-1.19967	NA	NA	NA	NA	NA	NA	NA			Erlotinib core gene group
CGN	NA	NA	NA	NA	NA	NA	NA	NA	-1.02048	NA	NA	NA	NA	NA	NA	NA
CGREF1	NA	NA	NA	NA	NA	NA	NA	1.18061	1.39878	NA	NA	NA	NA	NA	NA	NA			Erlotinib core gene group
CHCHD4	NA	NA	NA	NA	NA	NA	NA	NA	1.23391	NA	NA	NA	NA	NA	NA	NA
CHN1	NA	NA	NA	NA	NA	NA	NA	NA	1.03443	NA	NA	NA	NA	NA	NA	NA
DANCR	NA	NA	NA	NA	NA	NA	NA	1.12057	1.26992	NA	NA	NA	NA	NA	NA	NA			Erlotinib core gene group
DKK1	NA	NA	NA	NA	NA	NA	NA	1.00017	1.19771	NA	NA	NA	NA	NA	NA	NA			Erlotinib core gene group
DPF1	NA	NA	NA	NA	NA	NA	NA	NA	1.07867	NA	NA	NA	NA	NA	NA	NA
DPH2	NA	NA	NA	NA	NA	NA	NA	NA	1.00154	NA	NA	NA	NA	NA	NA	NA
DSCC1	NA	NA	NA	NA	NA	NA	NA	NA	1.08981	NA	NA	NA	NA	NA	NA	NA
DUSP2	NA	NA	NA	NA	NA	NA	NA	1.33952	1.04007	1.32671	NA	NA	NA	1.0924	NA	NA
EEF1E1	NA	NA	NA	NA	NA	NA	NA	NA	1.0729	NA	NA	NA	NA	NA	NA	NA
EFNA1	NA	NA	NA	NA	NA	NA	NA	-1.39545	-1.20559	NA	NA	NA	NA	NA	NA	NA			Erlotinib core gene group
EIF3B	NA	NA	NA	NA	NA	NA	NA	1.13246	1.02227	NA	NA	NA	NA	NA	NA	NA			Erlotinib core gene group
EPHB4	NA	NA	NA	NA	NA	NA	NA	1.10933	1.06775	NA	NA	NA	NA	NA	NA	NA			Erlotinib core gene group
ERG	NA	NA	NA	NA	NA	NA	NA	1.32832	1.03357	NA	NA	NA	NA	NA	NA	NA			Erlotinib core gene group
ERVMER34-1	NA	NA	NA	NA	NA	NA	NA	1.0574	1.20316	NA	NA	NA	NA	NA	NA	NA			Erlotinib core gene group
F12	NA	NA	NA	NA	NA	NA	NA	1.59373	1.20608	1.11117	NA	NA	NA	NA	NA	NA
FAHD2B	NA	NA	NA	NA	NA	NA	NA	NA	-1.01918	NA	NA	NA	NA	NA	NA	NA
FAM213A	NA	NA	NA	NA	NA	NA	NA	NA	1.09404	1.01121	NA	NA	NA	NA	1.00608	NA
FAM241A	NA	NA	NA	NA	NA	NA	NA	NA	1.3118	NA	NA	NA	NA	NA	NA	NA
FAM46A	NA	NA	NA	NA	NA	NA	NA	-1.31833	-1.05016	-1.02734	NA	NA	NA	-1.1083	NA	NA
FAM81A	NA	NA	NA	NA	NA	NA	NA	NA	1.07113	NA	NA	NA	NA	NA	NA	NA
FAM86JP	NA	NA	NA	NA	NA	NA	NA	1.19868	1.31243	NA	NA	NA	NA	NA	NA	NA			Erlotinib core gene group
FGFBP1	NA	NA	NA	NA	NA	NA	NA	NA	2.18148	NA	NA	NA	NA	NA	NA	NA
FJX1	NA	NA	NA	NA	NA	NA	NA	1.02035	1.34057	NA	NA	NA	NA	NA	NA	NA			Erlotinib core gene group
FRAT1	NA	NA	NA	NA	NA	NA	NA	NA	-1.06155	NA	NA	NA	NA	NA	NA	NA
GADD45GIP1	NA	NA	NA	NA	NA	NA	NA	NA	1.07572	NA	NA	NA	NA	NA	NA	NA
GAR1	NA	NA	NA	NA	NA	NA	NA	1.2304	1.17047	NA	NA	NA	NA	NA	NA	NA			Erlotinib core gene group
GJB6	NA	NA	NA	NA	NA	NA	NA	NA	1.29663	1.03173	NA	NA	NA	NA	NA	NA
GNG4	NA	NA	NA	NA	NA	NA	NA	1.45178	1.11525	1.1599	NA	NA	NA	NA	NA	NA
GNL3	NA	NA	NA	NA	NA	NA	NA	1.29381	1.18799	NA	NA	NA	NA	NA	NA	NA			Erlotinib core gene group
GPATCH4	NA	NA	NA	NA	NA	NA	NA	1.55858	1.25034	NA	NA	NA	NA	NA	NA	NA			Erlotinib core gene group
GRN	NA	NA	NA	NA	NA	NA	NA	-1.10201	-1.01718	NA	NA	NA	NA	NA	NA	NA			Erlotinib core gene group
GRWD1	NA	NA	NA	NA	NA	NA	NA	1.02082	1.05025	NA	NA	NA	NA	NA	NA	NA			Erlotinib core gene group
GTF3A	NA	NA	NA	NA	NA	NA	NA	NA	1.12203	NA	NA	NA	NA	NA	NA	NA
GUCY1B2	NA	NA	NA	NA	NA	NA	NA	NA	-1.48139	NA	NA	NA	NA	NA	NA	NA
HNRNPAB	NA	NA	NA	NA	NA	NA	NA	1.18091	1.03187	NA	NA	NA	NA	NA	NA	NA			Erlotinib core gene group
HOGA1	NA	NA	NA	NA	NA	NA	NA	NA	-1.59317	NA	NA	NA	NA	NA	NA	NA
HOMEZ	NA	NA	NA	NA	NA	NA	NA	-1.23801	-1.10363	NA	NA	NA	NA	NA	NA	NA			Erlotinib core gene group
HSPA9	NA	NA	NA	NA	NA	NA	NA	NA	1.01066	NA	NA	NA	NA	NA	NA	NA
IFFO2	NA	NA	NA	NA	NA	NA	NA	1.16942	1.05055	NA	NA	NA	NA	NA	NA	NA			Erlotinib core gene group
IRS1	NA	NA	NA	NA	NA	NA	NA	1.01798	1.09633	NA	NA	NA	NA	NA	NA	NA			Erlotinib core gene group
KBTBD3	NA	NA	NA	NA	NA	NA	NA	-1.42931	-1.25331	NA	NA	NA	NA	NA	NA	NA			Erlotinib core gene group
KCNQ5	NA	NA	NA	NA	NA	NA	NA	1.03179	1.166	NA	NA	NA	NA	NA	NA	NA			Erlotinib core gene group
KLF16	NA	NA	NA	NA	NA	NA	NA	NA	1.03027	NA	NA	NA	NA	NA	NA	NA
LAMA2	NA	NA	NA	NA	NA	NA	NA	NA	-1.39549	NA	NA	NA	NA	NA	NA	NA
LBR	NA	NA	NA	NA	NA	NA	NA	1.04126	1.11059	NA	NA	NA	NA	NA	NA	NA			Erlotinib core gene group
LEKR1	NA	NA	NA	NA	NA	NA	NA	NA	-1.35747	NA	NA	NA	NA	NA	NA	NA
LINC00460	NA	NA	NA	NA	NA	NA	NA	2.00702	2.2549	NA	NA	NA	NA	1.36055	NA	NA			Erlotinib core gene group
LINC01376	NA	NA	NA	NA	NA	NA	NA	NA	-1.92966	NA	NA	NA	NA	NA	NA	NA
LIPE	NA	NA	NA	NA	NA	NA	NA	-3.0303	-3.61563	NA	NA	NA	NA	NA	NA	NA			Erlotinib core gene group
LPAR2	NA	NA	NA	NA	NA	NA	NA	NA	-1.37745	NA	NA	NA	NA	NA	NA	NA
MAGED2	NA	NA	NA	NA	NA	NA	NA	-1.14984	-1.00268	NA	NA	NA	NA	NA	NA	NA			Erlotinib core gene group
MAPK8IP2	NA	NA	NA	NA	NA	NA	NA	NA	-1.89876	NA	NA	NA	NA	NA	NA	NA
MARCH1	NA	NA	NA	NA	NA	NA	NA	-1.3038	-1.63618	NA	NA	NA	NA	NA	NA	NA			Erlotinib core gene group
MCM10	NA	NA	NA	NA	NA	NA	NA	NA	1.05876	NA	NA	NA	NA	NA	NA	NA
MGMT	NA	NA	NA	NA	NA	NA	NA	NA	-1.14251	NA	NA	NA	NA	NA	NA	NA
MIR193BHG	NA	NA	NA	NA	NA	NA	NA	NA	-1.20335	NA	NA	NA	NA	NA	NA	NA
MMP25-AS1	NA	NA	NA	NA	NA	NA	NA	NA	-1.27868	NA	NA	NA	NA	NA	NA	NA
MT-TQ	NA	NA	NA	NA	NA	NA	NA	NA	-1.6022	NA	NA	NA	NA	NA	NA	NA
MUC2	NA	NA	NA	NA	NA	NA	NA	6.17452	5.73622	4.70564	NA	NA	NA	2.72998	NA	NA
NDUFAF4	NA	NA	NA	NA	NA	NA	NA	NA	1.17202	NA	NA	NA	NA	NA	NA	NA
NDUFAF8	NA	NA	NA	NA	NA	NA	NA	NA	1.08139	NA	NA	NA	NA	NA	NA	NA
NEK6	NA	NA	NA	NA	NA	NA	NA	2.33346	1.79406	1.62619	NA	NA	NA	1.56212	NA	NA
NELL2	NA	NA	NA	NA	NA	NA	NA	-1.43806	-1.15066	NA	NA	NA	NA	NA	NA	NA			Erlotinib core gene group
NFKBIZ	NA	NA	NA	NA	NA	NA	NA	NA	-1.41606	NA	NA	NA	NA	NA	NA	NA
NHLRC3	NA	NA	NA	NA	NA	NA	NA	NA	-1.00212	NA	NA	NA	NA	NA	NA	NA
NIFK	NA	NA	NA	NA	NA	NA	NA	NA	1.06431	NA	NA	NA	NA	NA	NA	NA
NLE1	NA	NA	NA	NA	NA	NA	NA	1.20934	1.1095	NA	NA	NA	NA	NA	NA	NA			Erlotinib core gene group
NOL3	NA	NA	NA	NA	NA	NA	NA	NA	-1.17036	NA	NA	NA	NA	NA	NA	NA
NOP2	NA	NA	NA	NA	NA	NA	NA	1.25941	1.09618	NA	NA	NA	NA	NA	NA	NA			Erlotinib core gene group
NR3C2	NA	NA	NA	NA	NA	NA	NA	-1.48393	-1.5493	NA	NA	NA	NA	NA	NA	NA			Erlotinib core gene group
NXT1	NA	NA	NA	NA	NA	NA	NA	NA	1.03144	NA	NA	NA	NA	NA	NA	NA
OPTN	NA	NA	NA	NA	NA	NA	NA	NA	-1.05934	NA	NA	NA	NA	NA	NA	NA
P2RY11	NA	NA	NA	NA	NA	NA	NA	1.76604	1.08129	NA	NA	NA	NA	NA	NA	NA			Erlotinib core gene group
PAICS	NA	NA	NA	NA	NA	NA	NA	NA	1.00346	NA	NA	NA	NA	NA	NA	NA
PARD3B	NA	NA	NA	NA	NA	NA	NA	NA	-1.20938	NA	NA	NA	NA	NA	NA	NA
PGAM5	NA	NA	NA	NA	NA	NA	NA	NA	1.12529	NA	NA	NA	NA	NA	NA	NA
PLCL1	NA	NA	NA	NA	NA	NA	NA	-3.19885	-3.68087	NA	NA	NA	NA	NA	NA	NA			Erlotinib core gene group
PLD2	NA	NA	NA	NA	NA	NA	NA	NA	-1.00698	NA	NA	NA	NA	NA	NA	NA
PLD6	NA	NA	NA	NA	NA	NA	NA	NA	1.2218	NA	NA	NA	NA	NA	NA	NA
POLR1B	NA	NA	NA	NA	NA	NA	NA	NA	1.11083	NA	NA	NA	NA	NA	NA	NA
POLR1E	NA	NA	NA	NA	NA	NA	NA	NA	1.10199	NA	NA	NA	NA	NA	NA	NA
POLR3K	NA	NA	NA	NA	NA	NA	NA	NA	1.0839	NA	NA	NA	NA	NA	NA	NA
PPAN	NA	NA	NA	NA	NA	NA	NA	1.77878	1.08687	NA	NA	NA	NA	NA	NA	NA			Erlotinib core gene group
PPARGC1B	NA	NA	NA	NA	NA	NA	NA	1.16385	1.07514	NA	NA	NA	NA	NA	NA	NA			Erlotinib core gene group
[truncated: 416 more rows]

## Sheet: Table S3 RNA_PAL 
Pathway	cetuximab_egf_vs_no	cetuximab_sd_vs_no	cetuximab_vs_no		erlotinib_vs_no	egf_erlotinib_vs_no	sd_erlotinib_vs_no		sd_vs_no	egf_vs_no		cetuximab_egf_vs_cetuximab	cetuximab_egf_vs_egf	cetuximab_sd_vs_cetuximab	cetuximab_sd_vs_sd	egf_erlotinib_vs_egf	egf_erlotinib_vs_erlotinib	sd_erlotinib_vs_sd	sd_erlotinib_vs_erlotinib
Combined 1.3 - 2-deoxy-alpha-D-ribose_1-phosphate_degradation	NA	NA	-96.8623		-103.7	-89.1801	-51.898		NA	NA		121.862	NA	NA	-80.435	-131.479	NA	-86.1219	52.4125
Combined 1.3 - 4-hydroxybenzoate_biosynthesis	NA	11.9276	-45.6692		-3.79092	-40.5685	12.4062		NA	14.2358		51.986	NA	NA	-5.21229	-51.986	NA	-6.79899	19.3273
Combined 1.3 - androgen_biosynthesis	NA	6.912	-26.0574		-24.433	-9.65315	-14.2866		NA	13.3		40.1365	NA	NA	-2.14336	-21.3962	NA	-23.5883	10.217
Combined 1.3 - biocarta_sprouty_regulation_of_tyrosine_kinase_signals_Pathway_(cell_migration)	NA	NA	-91.7203		-128.749	-104.927	NA		NA	NA		83.7706	NA	31.0122	-76.1423	-145.105	NA	-101.487	NA
Combined 1.3 - citrulline-nitric_oxide_cycle	NA	NA	-36.2867		-41.6573	-40.9071	-32.1907		NA	2.63371		35.8605	NA	5.52751	-34.7188	-41.7593	NA	-35.3284	8.05543
Combined 1.3 - D-glucuronate_degradation	NA	1.02178	-44.0187		-81.4459	NA	-33.9271		NA	14.3098		NA	NA	NA	-12.8574	-83.4653	NA	-48.2513	48.2957
Combined 1.3 - ethanol_degradation_IV	NA	NA	-36.6937		-46.5947	-28.0949	-20.9922		NA	NA		46.8903	NA	NA	-27.4009	-63.3567	NA	-27.7743	26.4355
Combined 1.3 - histamine_biosynthesis	NA	NA	-26.6833		16.2186	15.2428	16.2186		NA	14.9443		34.9941	NA	34.9941	16.946	0	0	21.1211	0
Combined 1.3 - KEGG_Signaling_pathways_regulating_pluripotency_of_stem_cells_Main_Pathway	NA	46.282	-49.2258		-40.375	17.0836	10.5037		NA	NA		NA	NA	NA	-50.258	NA	NA	-91.083	NA
Combined 1.3 - methylglyoxal_degradation_III	NA	NA	-77.0337		-61.171	3.29474	-43.003		NA	NA		89.1567	NA	35.6256	-46.648	-14.0043	NA	-50.6948	17.6006
Combined 1.3 - NCI_Glypican_2_network_Main_Pathway	NA	NA	-73.5418		-31.6642	-66.8885	8.20497		NA	NA		70.1741	NA	26.1135	NA	-91.6291	NA	-25.1141	41.8299
Combined 1.3 - NCI_IL12_signaling_mediated_by_STAT4_Pathway_(natural_killer_cell_mediated_cytotoxicity)	NA	NA	-72.0982		-105.422	-131.401	NA		NA	NA		67.4342	NA	11.2679	NA	-113.228	NA	-128.103	1.85776
Combined 1.3 - NCI_IL12_signaling_mediated_by_STAT4_Pathway_(T_helper_1_cell_differentiation)	NA	NA	-72.0982		-105.422	-131.401	NA		NA	NA		67.4342	NA	11.2679	NA	-113.228	NA	-128.103	1.85776
Combined 1.3 - NCI_IL12_signaling_mediated_by_STAT4_Pathway_(T_helper_2_cell_differentiation)	NA	NA	-72.0982		-105.422	-131.401	NA		NA	NA		67.4342	NA	11.2679	NA	-113.228	NA	-128.103	1.85776
Combined 1.3 - NCI_S1P1_Pathway_(negative_regulation_of_cAMP_metabolic_process)	NA	NA	-85.5645		-90.1095	-88.8589	-69.2954		NA	13.4704		78.3851	NA	NA	-38.8658	-97.2001	NA	-66.1594	19.9258
Combined 1.3 - NCI_S1P1_Pathway_(negative_regulation_of_T_cell_proliferation)	NA	NA	-85.5645		-90.1095	-88.8589	-69.2954		NA	13.4704		78.3851	NA	NA	-38.8658	-97.2001	NA	-66.1594	19.9258
Combined 1.3 - NCI_S1P4_Pathway_(cell_migration)	NA	NA	-76.1145		-79.5954	-77.6601	-52.5774		NA	4.82149		71.0592	NA	NA	-41.9471	-78.2781	NA	-55.7753	27.8262
Combined 1.3 - NCI_S1P5_Pathway_(negative_regulation_of_cAMP_metabolic_process)	NA	NA	-88.4677		-100.07	-84.6708	-67.9524		NA	NA		84.1444	NA	36.1927	NA	-102.872	NA	-78.8986	32.2419
Combined 1.3 - NCI_S1P5_Pathway_(telencephalon_oligodendrocyte_cell_migration)	NA	NA	-79.4246		-88.3867	-74.3258	-59.9936		NA	NA		75.1843	NA	33.2842	-53.1877	-91.6619	NA	-69.999	28.5087
Combined 1.3 - oleate_biosynthesis	NA	NA	-27.7931		-28.1383	-15.825	-27.3086		NA	11.9488		29.2511	NA	-0.2391	-20.443	-26.0038	NA	-16.4565	1.1435
Combined 1.3 - p53_Signaling_Pathway_Inhibition_of_IGF1R_mTOR_Pathways	NA	NA	-34.3165		-40.0305	-43.6256	-42.8992		NA	NA		49.5472	NA	-19.3019	-58.3454	-96.6701	NA	-46.7019	-2.60107
Combined 1.3 - phenylalanine_degradationtyrosine_biosynthesis	0	0	-51.9382		-33.72	0	-13.5155		0	0		46.2098	NA	NA	0	0	NA	-13.5155	19.5929
Combined 1.3 - reactome_Bile_salt_and_organic_anion_SLC_transporters_Main_Pathway	NA	NA	-87.4729		-84.5308	-74.9447	-45.876		NA	2.85469		94.0573	NA	NA	NA	-72.907	NA	-78.5204	38.3402
Combined 1.3 - reactome_CS_DS_degradation_Main_Pathway	NA	4.8176	-29.9767		1.08061	-10.845	20.5669		NA	NA		33.0749	NA	32.1826	8.06395	-31.6137	NA	23.7675	20.8163
Combined 1.3 - reactome_Dermatan_sulfate_biosynthesis_Main_Pathway	NA	2.98393	-30.3805		5.76584	-4.92865	19.1247		NA	NA		27.0173	NA	30.7442	16.6657	-21.8553	NA	33.5056	14.5409
Combined 1.3 - reactome_POU5F1_OCT4_SOX2_NANOG_repress_genes_related_to_differentiation_Main_Pathway	NA	15.4273	-51.8149		-28.1445	-25.5805	3.50123		NA	NA		69.7165	NA	NA	-12.9169	-73.4448	NA	-23.8876	33.4271
Combined 1.3 - reactome_Synthesis_of_bile_acids_and_bile_salts_via_24_hydroxycholesterol_Main_Pathway	NA	5.40517	-39.3281		-44.0448	-17.5224	-7.68044		NA	NA		48.5907	NA	41.8821	-14.748	-40.1619	NA	-28.4609	37.2662
Combined 1.3 - reactome_Toll_Like_Receptor_TLR6_TLR2_Cascade_Main_Pathway	NA	23.315	-28.4682		19.3798	7.79368	4.92131		NA	NA		42.4751	NA	NS	30.7313	-18.2647	NA	11.1598	-16.2438
Combined 1.3 - trehalose_degradation	NA	-0.0376557	-30.5946		16.7024	10.5454	20.7004		NA	NA		41.1346	NA	NA	-5.16753	-7.56559	NA	11.5419	4.21055
Combined 1.3 - tryptophan_degradation_X_mammalian_via_tryptamine	NA	2.48078	-44.6455		-61.2228	-44.9509	-17.9559		NA	NA		91.2475	NA	44.5878	-48.9954	-114.188	NA	-71.0906	43.3746
Combined 1.3 - 4-aminobutyrate_degradation	-15.2671	2.31849	-73.6955		-96.4493	-48.2484	-28.0601		NA	NA		54.5875	NA	67.5597	9.16265	-64.5127	NA	-19.7088	NA
Combined 1.3 - acetyl-CoA_biosynthesis_from_citrate	-8.69727	-3.57102	25.4162		27.6748	24.5798	1.506		NA	6.96804		-34.0508	NA	-27.9792	-4.21191	17.4719	NA	0.919049	-25.8103
Combined 1.3 - ATM_Pathway_Apoptosis	-9.61831	-54.3835	-78.9997		-23.416	-36.5604	-11.0378		NA	NA		63.9501	NA	21.5718	-63.9291	-34.1543	NA	-22.4316	14.2391
Combined 1.3 - biocarta_cdk_regulation_of_dna_replication_Main_Pathway	NA	-2.40453	22.2568		30.6147	27.8636	-1.56333		NA	NA		-20.1932	NA	-23.836	-5.94255	7.25511	NA	-4.98563	-31.9445
Combined 1.3 - biocarta_downregulated_of_mta_3_in_er_negative_breast_tumors_Main_Pathway	NA	-38.2306	-50.3841		-105.839	NA	NA		NA	11.3103		49.5894	NA	10.4505	14.5657	-97.4646	NA	-37.7923	11.7913
Combined 1.3 - biocarta_e2f1_destruction_Main_Pathway	NA	2.79247	23.0909		25.678	29.7003	0.287054		NA	4.99378		-21.7291	NA	-19.2574	3.13752	23.1042	NA	0.014159	-25.233
Combined 1.3 - biocarta_hiv_1_nef_negative_effector_of_fas_and_tnf_Pathway_(Pathway_protein_ubiquitination_of_CHUK)	-12.4714	-4.78959	19.875		32.6629	23.1771	-6.64822		NA	NA		-30.2856	NA	-22.6812	10.4235	39.9615	NA	8.88266	-39.1287
Combined 1.3 - biocarta_sprouty_regulation_of_tyrosine_kinase_signals_Pathway_(Pathway_protein_ubiquitination_of_CBL)	-9.82206	NA	-44.6236		-62.8182	-65.237	-50.131		NA	NA		32.5802	NA	5.22243	-38.7306	-80.1289	NA	-49.2002	14.0089
Combined 1.3 - D-mannose_degradation	-32.1211	NA	-36.6507		-19.1442	-21.1694	3.19817		NA	NA		4.9679	NA	-0.737123	-45.0994	-1.31004	NA	-3.53151	22.3728
Combined 1.3 - dopamine_degradation	NA	-6.28835	-35.524		-51.7004	-18.8493	-22.8243		NA	NA		70.9231	NA	NA	NA	-42.8349	NA	-67.3437	27.0979
Combined 1.3 - dTMP_ide_novoi_biosynthesis_mitochondrial	NA	-14.4682	25.1428		32.2165	16.285	-16.495		NA	NA		-29.1122	NA	NA	-20.1305	-16.0083	NA	-21.8813	-48.6484
Combined 1.3 - folate_polyglutamylation	-8.7525	0.0833838	29.1213		50.1612	35.0611	15.316		NA	10.2998		-37.3933	NA	-28.2476	5.48365	NA	NA	20.8604	-34.8341
Combined 1.3 - folate_transformations	NA	6.84375	28.6646		26.0861	23.2758	-10.4088		NA	13.8938		NA	NA	-20.5302	NA	9.3572	NA	-1.76781	-36.4039
Combined 1.3 - GABA_shunt	-12.5018	NA	-59.6826		-60.7454	-42.783	-23.4954		NA	3.03784		45.3614	NA	38.2208	-11.3167	-45.4028	NA	-16.3293	39.2464
Combined 1.3 - glutamine_biosynthesis	-20.8585	NA	-99.2072		-86.4283	-65.3147	-30.0337		NA	2.11714		78.9516	-23.8862	NA	-40.7357	-67.7971	NA	-27.2895	54.6058
Combined 1.3 - hydrogen_sulfide_biosynthesis_trans-sulfuration	NA	24.2044	NA		75.1341	70.691	NA		NA	NA		NA	NA	NA	27.8886	28.2887	NA	NA	-27.0965
Combined 1.3 - KEGG_Ascorbate_and_aldarate_metabolism_Main_Pathway	NA	-32.8933	-58.0012		-47.362	-46.0768	-25.886		NA	11.2072		68.8197	NA	23.9773	-43.5122	-53.8558	NA	-36.6266	22.1598
Combined 1.3 - KEGG_Chemical_carcinogenesis_Main_Pathway	NA	-25.8105	-57.5325		-51.1523	-44.3272	-20.8262		NA	NA		70.6584	NA	30.1578	-42.755	-60.0805	NA	-38.496	31.0393
Combined 1.3 - KEGG_Histidine_metabolism_Main_Pathway	NA	-6.25152	-40.0078		-39.5433	-31.122	-11.3802		NA	NA		60.1012	NA	31.3018	-28.2466	-59.675	NA	-33.8304	28.5769
Combined 1.3 - KEGG_Legionellosis_Main_Pathway	-26.9653	NA	-55.2649		-53.0348	-42.9901	-30.2695		NA	NA		28.235	NA	8.90629	-25.7205	-23.8784	NA	-7.84357	23.6072
Combined 1.3 - KEGG_Lipoic_acid_metabolism_Main_Pathway	NA	-7.41982	32.9075		7.03014	11.8397	-0.315999		NA	15.5717		-8.33269	NA	NA	-12.6715	-3.28379	NA	-5.99706	-7.48454
Combined 1.3 - KEGG_Pentose_and_glucuronate_interconversions_Main_Pathway	NA	-29.9243	-53.3877		-44.4016	-40.4249	-25.2201		NA	12.3066		61.8588	NA	21.9642	-38.6875	-49.8072	NA	-33.8963	19.7232
Combined 1.3 - KEGG_Systemic_lupus_erythematosus_Main_Pathway	-20.4784	NA	-58.2216		-38.3986	-42.9583	-16.6324		NA	NA		35.8707	NA	9.40071	-63.188	-15.3223	NA	-30.4046	24.4184
Combined 1.3 - KEGG_Thyroid_hormone_synthesis_Main_Pathway	NA	-13.6709	-15.2813		-56.3808	-3.67241	-1.09288		NA	6.57959		29.2882	NA	3.51968	-2.65858	-11.6925	NA	10.4343	NA
Combined 1.3 - KEGG_Valine_leucine_and_isoleucine_biosynthesis_Main_Pathway	NA	6.24337	26.4745		29.8199	29.7025	-0.361092		NA	NA		-20.7299	NA	-19.1654	17.8345	0.33145	NA	12.1791	-30.9152
Combined 1.3 - MAPK_Signaling_Pathway_Cell_Survival	NA	-13.0965	-69.5917		-73.8284	-71.9823	-29.4467		NA	9.30287		73.0344	NA	53.1612	-9.54392	-77.1251	NA	-27.0004	44.1608
Combined 1.3 - melatonin_degradation_II	-49.9483	-25.7754	-70.1109		-60.2509	-26.2622	-0.978205		NA	NA		19.851	NA	NA	-32.307	60.1255	NA	-6.88087	59.5642
Combined 1.3 - methylglyoxal_degradation_VI	-55.2916	NA	-45.7877		-47.755	-68.8578	8.1093		NA	NA		-5.77623	NA	10.3173	-21.0974	-17.3287	NA	23.5731	NA
Combined 1.3 - NCI_Alpha_synuclein_signaling_Pathway_(Pathway_degradation_of_SNCA)	NA	-5.42167	36.9194		26.1266	15.2992	0.758071		NA	3.39594		-32.7154	NA	-37.0343	4.71166	11.1431	NA	12.2052	-26.0759
Combined 1.3 - NCI_Alpha_synuclein_signaling_Pathway_(Pathway_negative_regulation_of_transcription_via_SNCA)	NA	-7.34424	39.3529		27.0416	13.7173	0.385345		NA	NA		-33.5889	NA	-39.9615	6.27204	13.7167	NA	15.7072	-27.6123
Combined 1.3 - NCI_Alpha_synuclein_signaling_Pathway_(Pathway_positive_regulation_of_gene_specific_transcription_via_SNCA)	NA	-7.34424	39.3529		27.0416	13.7173	0.385345		NA	NA		-33.5889	NA	-39.9615	6.27204	13.7167	NA	15.7072	-27.6123
Combined 1.3 - NCI_Alternative_NF_kappaB_Main_Pathway	-6.89132	14.0301	43.3622		43.1185	34.0558	-1.5785		NA	NA		-48.1538	NA	-27.7097	34.0738	52.0984	NA	18.4735	-44.4099
Combined 1.3 - NCI_Alternative_NF_kappaB_Pathway_(regulation_of_B_cell_activation)	-6.89132	14.0301	43.3622		43.1185	34.0558	-1.5785		NA	NA		-48.1538	NA	-27.7097	34.0738	52.0984	NA	18.4735	-44.4099
Combined 1.3 - NCI_amb2_Integrin_signaling_Pathway_(actin_filament_polymerization)	-10.5516	1.89981	16.7635		32.4385	51.5603	-32.9444		NA	NA		-23.7279	NA	-11.5251	25.0346	56.3289	NA	-7.75296	-68.1816
Combined 1.3 - NCI_CD40_CD40L_signaling_Pathway_(proteasomal_ubiquitin_dependent_protein_catabolic_process)	-36.7833	-12.0524	55.7119		111.685	73.3237	-23.97		NA	NA		NA	NA	NA	36.238	121.697	NA	25.7703	-135.134
Combined 1.3 - NCI_CD40_CD40L_signaling_Pathway_(regulation_of_germinal_center_formation)	-21.332	-11.4707	6.41577		35.7069	16.6973	-24.8921		NA	NA		-25.9135	NA	-16.3242	17.2949	60.8572	NA	4.67586	-60.1792
Combined 1.3 - NCI_CD40_CD40L_signaling_Pathway_(regulation_of_isotype_switching_to_IgE_isotypes)	-21.332	-11.4707	6.41577		35.7069	16.6973	-24.8921		NA	NA		-25.9135	NA	-16.3242	17.2949	60.8572	NA	4.67586	-60.1792
Combined 1.3 - NCI_CXCR3_mediated_signaling_events_Pathway_(actin_polymerization_or_depolymerization)	-21.8825	NA	-46.2854		-45.1858	-39.956	-43.6933		NA	NA		22.9453	NA	-5.53782	-57.9302	4.11149	NA	-50.0229	0.490935
Combined 1.3 - NCI_CXCR3_mediated_signaling_events_Pathway_(cAMP_biosynthetic_process)	-71.3129	NA	-26.4167		-4.72344	0.856869	-44.3187		NA	NA		-42.6631	NA	NA	NA	NA	NA	-45.3863	-42.5385
Combined 1.3 - NCI_CXCR3_mediated_signaling_events_Pathway_(cell_adhesion)	-17.2116	NA	-40.0269		-37.93	-36.3368	-34.7713		NA	NA		21.5245	NA	-4.71161	-52.7132	0.925063	NA	-42.6331	2.16678
Combined 1.3 - NCI_CXCR3_mediated_signaling_events_Pathway_(chemotaxis)	-16.8234	NA	-37.6391		-42.6054	-37.9757	-42.2279		NA	NA		19.3524	NA	-4.59085	-45.9499	0.50318	NA	-46.5272	-0.240446
Combined 1.3 - NCI_CXCR3_mediated_signaling_events_Pathway_(regulation_of_stress_fiber_assembly)	-71.3129	NA	-26.4167		-4.72344	0.856869	-44.3187		NA	NA		-42.6631	NA	NA	NA	NA	NA	-45.3863	-42.5385
Combined 1.3 - NCI_Endogenous_TLR_signaling_Pathway_(regulation_of_granulocyte_colony_stimulating_factor_production)	NA	-74.3666	-72.8451		-29.0936	-59.9839	-72.5083		NA	NA		81.7221	NA	-4.05549	-72.7389	-79.0149	NA	-73.0406	-45.8148
Combined 1.3 - NCI_Endogenous_TLR_signaling_Pathway_(regulation_of_interleukin_10_production)	NA	-74.3666	-72.8451		-29.0936	-59.9839	-72.5083		NA	NA		81.7221	NA	-4.05549	-72.7389	-79.0149	NA	-73.0406	-45.8148
Combined 1.3 - NCI_Endogenous_TLR_signaling_Pathway_(regulation_of_interleukin_6_production)	NA	-11.9728	-50.3372		-8.14801	-22.9929	10.9799		NA	NA		75.8273	NA	34.1108	-14.2107	-72.6635	NA	7.2029	19.7085
Combined 1.3 - NCI_Endogenous_TLR_signaling_Pathway_(regulation_of_tumor_necrosis_factor_production)	NA	-11.9728	-50.3372		-8.14801	-22.9929	10.9799		NA	NA		75.8273	NA	34.1108	-14.2107	-72.6635	NA	7.2029	19.7085
Combined 1.3 - NCI_EPHA_forward_signaling_Pathway_(actin_filament_depolymerization)	NA	-13.6995	-32.5222		-41.2994	-9.88149	0.309632		NA	8.26621		44.205	NA	17.8104	-8.81831	-17.744	NA	6.63049	43.7998
Combined 1.3 - NCI_FOXA1_transcription_factor_network_Main_Pathway	NA	-38.2306	-50.3841		-105.839	NA	NA		NA	11.3103		49.5894	NA	10.4505	14.5657	-97.4646	NA	-37.7923	11.7913
Combined 1.3 - NCI_FOXA2_and_FOXA3_transcription_factor_networks_Main_Pathway	NA	31.2203	NA		96.7875	86.4172	NA		NA	NA		-53.1932	NA	NA	18.8087	30.9163	NA	NA	-6.10558
Combined 1.3 - NCI_HIV_1_Nef_Negative_effector_of_Fas_and_TNF_alpha_Pathway_(protein_ubiquitination)	-10.0838	-3.49976	17.2383		29.2865	20.6161	-4.7203		NA	NA		-25.5847	NA	-19.0761	7.66426	33.7295	NA	6.64349	-33.7536
Combined 1.3 - NCI_IL23_mediated_signaling_events_Pathway_(positive_regulation_of_dendritic_cell_antigen_processing_and_presentation)	-40.8426	34.774	63.6597		25.1495	27.8432	-18.5887		NA	NA		-100.833	NA	-28.1888	83.3738	74.5893	NA	33.5345	-45.4325
Combined 1.3 - NCI_IL4_mediated_signaling_events_Pathway_(T_cell_proliferation)	-30.7234	NA	-54.4677		-32.9246	-54.8051	-9.11972		NA	NA		23.5866	NA	11.1217	-38.5315	-7.78343	NA	-3.95579	23.9723
Combined 1.3 - NCI_IL4_mediated_signaling_events_Pathway_(T_helper_1_cell_differentiation)	-30.7234	NA	-54.4677		-32.9246	-54.8051	-9.11972		NA	NA		23.5866	NA	11.1217	-38.5315	-7.78343	NA	-3.95579	23.9723
Combined 1.3 - NCI_IL4_mediated_signaling_events_Pathway_(T_helper_2_cell_differentiation)	-30.7234	NA	-54.4677		-32.9246	-54.8051	-9.11972		NA	NA		23.5866	NA	11.1217	-38.5315	-7.78343	NA	-3.95579	23.9723
Combined 1.3 - NCI_LKB1_signaling_events_Pathway_(chromatin_remodeling)	NA	-24.7413	-61.2072		-65.3196	-84.0324	-27.3541		NA	NA		83.3687	NA	33.784	-56.9358	-104.16	NA	-61.6545	37.6495
Combined 1.3 - NCI_Nongenotropic_Androgen_signaling_Pathway_(cAMP_biosynthetic_process)	NA	-28.5314	-64.4102		-76.1098	-67.0837	-46.7637		NA	NA		65.4882	NA	33.3988	-45.5053	-89.6485	NA	-65.2444	29.1351
Combined 1.3 - NCI_Plasma_membrane_estrogen_receptor_signaling_Pathway_(JNK_cascade)	-14.9154	-29.0116	-80.1031		-8.41755	-50.5122	15.7697		NA	2.31271		62.7547	NA	NA	-20.5617	-48.0453	NA	21.1817	26.1373
Combined 1.3 - NCI_PLK1_signaling_events_Pathway_(chromosome_segregation)	NA	-5.98248	32.9706		27.182	19.5068	-10.2775		NA	NA		-31.1262	NA	-37.6705	-12.251	-7.99987	NA	-16.6959	-37.2894
Combined 1.3 - NCI_PLK1_signaling_events_Pathway_(G2_M_transition_of_mitotic_cell_cycle)	NA	-8.56556	23.0489		28.9146	17.5878	-2.12583		NA	NA		-19.3659	NA	-31.0017	-20.863	-13.8406	NA	-14.571	-31.0938
Combined 1.3 - NCI_PLK1_signaling_events_Pathway_(regulation_of_attachment_of_spindle_microtubules_to_kinetochore)	NA	-1.01236	19.9174		27.017	14.2351	0.271006		NA	NA		-16.5706	NA	-20.481	-9.856	-6.82135	NA	-8.66139	-26.699
Combined 1.3 - NCI_PLK3_signaling_events_Main_Pathway	NA	0.407508	25.2641		19.8355	21.3995	4.57444		NA	NA		-10.6875	NA	-23.6735	-1.04928	1.07954	NA	3.42023	-15.5367
Combined 1.3 - NCI_Regulation_of_retinoblastoma_protein_Pathway_(histone_methylation)	NA	-3.61224	20.6796		32.1333	25.9786	-0.406762		NA	NA		-13.6331	NA	-22.6303	-14.2386	-1.69085	NA	-11.2107	-32.0217
Combined 1.3 - NCI_S1P3_Pathway_(Sinus_Bradycardia)	-5.00062	NA	-81.1014		-97.4619	-83.3825	-66.9058		NA	15.422		72.2989	NA	34.08	-44.0528	-93.6288	NA	-64.2496	31.3217
Combined 1.3 - NCI_S1P5_Main_Pathway	NA	-36.0209	-65.3153		-74.4953	-62.095	-50.3526		NA	NA		62.1917	NA	27.2845	-44.508	-78.1242	NA	-59.4097	24.2222
Combined 1.3 - NCI_Signaling_events_mediated_by_VEGFR1_and_VEGFR2_Pathway_(stress_fiber_assembly)	NA	15.0277	49.5439		31.7896	34.9188	-1.945		NA	NA		-47.9194	NA	-31.0139	28.0516	62.4576	NA	11.1051	-34.3639
Combined 1.3 - NCI_Urokinase_type_plasminogen_activator_uPA_and_uPAR_mediated_signaling_Pathway_(cell_adhesion)	-16.0199	46.9197	95.6405		107.647	95.3768	NA		NA	NA		NA	NA	-45.8536	89.6125	157.288	NA	87.2684	-64.8791
Combined 1.3 - NCI_VEGFR1_specific_signals_Main_Pathway	NA	14.9284	25.1469		52.1975	33.7646	NA		NA	NA		-22.3134	NA	-9.84428	21.7894	40.2443	NA	52.7611	-8.95045
Combined 1.3 - oxidized_GTP_and_dGTP_detoxification	NA	24.1269	59.6743		38.6822	32.5975	-8.51538		NA	NA		-36.4241	NA	-33.5263	19.7737	-9.75544	NA	-13.1496	-46.4071
Combined 1.3 - putrescine_degradation_III	NA	-23.3475	-73.1715		-81.9565	-63.5237	-32.9596		NA	NA		101.996	NA	47.213	-55.9603	NA	NA	-66.8608	49.3318
Combined 1.3 - reactome_Abnormal_metabolism_in_phenylketonuria_Main_Pathway	-13.2596	-27.8075	26.6579		16.46	27.6627	-2.41911		NA	NA		-36.1456	NA	-46.6306	-37.6095	35.7592	NA	-11.6886	-19.0959
Combined 1.3 - reactome_Activation_of_ATR_in_response_to_replication_stress_Main_Pathway	NA	-0.777884	22.8786		30.0547	27.1932	0.812939		NA	15.7745		-20.4012	NA	-22.8115	-4.21417	11.4682	NA	-2.64893	-29.1314
Combined 1.3 - reactome_Activation_of_BMF_and_translocation_to_mitochondria_Main_Pathway	-10.2375	NA	-115.118		-123.612	-140.086	-92.981		NA	NA		98.6795	NA	NA	-69.6509	-126.938	NA	-100.307	32.2515
Combined 1.3 - reactome_Activation_of_the_pre_replicative_complex_Main_Pathway	NA	-0.869279	26.2592		35.605	30.8124	3.02298		NA	NA		-23.3337	NA	-26.1439	-6.49466	10.7629	NA	-2.55086	-32.4546
Combined 1.3 - reactome_Alternative_complement_activation_Main_Pathway	-58.205	NA	-65.1675		-34.921	-61.0677	-36.8866		NA	NA		6.2532	NA	-0.169152	-42.4879	9.88779	NA	-10.9231	-0.123558
Combined 1.3 - reactome_Amino_acid_synthesis_and_interconversion_transamination__Main_Pathway	-11.4308	0.940714	29.4369		35.1665	37.9654	7.55588		NA	5.31292		-38.6467	NA	-26.6998	13.7499	31.2059	NA	20.7651	-27.9646
Combined 1.3 - reactome_cell_division_Main_Pathway	NA	-4.06884	25.3169		41.5682	22.3106	2.14807		NA	NA		-23.2983	NA	-28.5796	-19.4846	-8.42026	NA	-13.4276	-39.3154
Combined 1.3 - reactome_ChREBP_activates_metabolic_gene_expression_Main_Pathway	NA	41.2723	54.7527		56.5808	65.9479	NA		NA	NA		-10.6944	NA	-12.4129	10.0488	36.6439	NA	NA	34.4496
Combined 1.3 - reactome_Condensation_of_Prometaphase_Chromosomes_Main_Pathway	NA	1.29474	25.3516		25.9869	17.2655	-2.63401		NA	NA		-16.4959	NA	-23.2073	-11.0381	-5.25354	NA	-14.9386	-28.4376
Combined 1.3 - reactome_Condensation_of_Prophase_Chromosomes_Main_Pathway	NA	-0.238243	30.4401		25.8107	23.5328	2.26076		NA	NA		-24.5042	NA	-29.6407	-10.6128	-7.09438	NA	-8.23409	-23.3844
Combined 1.3 - reactome_Cyclin_B2_mediated_events_Main_Pathway	NA	-10.4587	18.4424		26.6953	20.8218	-7.34185		NA	NA		-18.0311	NA	-27.8915	-19.889	-3.10047	NA	-16.8749	-33.7504
Combined 1.3 - reactome_Degradation_of_cysteine_and_homocysteine_Main_Pathway	-7.1626	-7.93532	15.7197		26.2795	15.9964	-3.24347		NA	0.887219		-21.7334	NA	-21.7064	23.4349	13.3583	NA	31.3536	-27.8699
Combined 1.3 - reactome_Deposition_of_new_CENPA_containing_nucleosomes_at_the_centromere_Main_Pathway	NA	-0.439925	27.0411		22.8398	20.8452	-0.0437208		NA	NA		-20.2732	NA	-26.3696	-9.63479	-7.08949	NA	-9.49047	-22.6057
Combined 1.3 - reactome_DNA_replication_initiation_Main_Pathway	NA	-0.358484	32.0559		44.9772	35.0734	10.6242		NA	15.5228		-31.6997	NA	-31.1049	-8.27733	19.5008	NA	2.82069	-34.2791
Combined 1.3 - reactome_E2F_mediated_regulation_of_DNA_replication_Main_Pathway	NA	-1.22532	34.3866		48.5833	36.1275	8.55676		NA	NA		-31.2509	NA	-33.3075	-6.80743	10.4655	NA	2.88667	-39.3811
Combined 1.3 - reactome_Early_Phase_of_HIV_Life_Cycle_Main_Pathway	NA	-11.1663	15.9222		32.0906	17.8742	1.06612		NA	NA		-14.2375	NA	-26.7571	-22.6784	-4.20013	NA	-10.3967	-31.1176
Combined 1.3 - reactome_Ethanol_oxidation_Main_Pathway	-15.6318	NA	-68.7772		-80.6503	-49.0355	-35.0153		NA	NA		50.4493	NA	34.5888	-29.0195	-81.4509	NA	-33.3544	NA
Combined 1.3 - reactome_Fibronectin_matrix_formation_Main_Pathway	-24.0223	-10.546	19.796		55.3101	38.2521	NA		NA	NA		-42.712	NA	-29.1406	-16.9992	NA	NA	36.2925	-13.695
Combined 1.3 - reactome_G1_S_Specific_Transcription_Main_Pathway	NA	-1.22532	34.3866		48.5833	36.1275	8.55676		NA	NA		-31.2509	NA	-33.3075	-6.80743	10.4655	NA	2.88667	-39.3811
Combined 1.3 - reactome_G2_M_DNA_replication_checkpoint_Main_Pathway	NA	-1.68563	28.0698		35.3047	22.9499	3.37003		NA	NA		-21.6767	NA	-28.7629	-11.5532	-9.87968	NA	-6.50295	-31.7675
Combined 1.3 - reactome_G2_Phase_Main_Pathway	NA	-0.979354	25.2007		32.0209	27.1019	2.83049		NA	15.4277		-21.1223	NA	-25.0452	-6.22516	11.1996	NA	-3.26644	-29.1626
Combined 1.3 - reactome_GRB2_SOS_provides_linkage_to_MAPK_signaling_for_Integrins_Main_Pathway	NA	-13.2055	-9.55716		-25.0458	-25.044	4.05124		NA	NA		12.6051	NA	-2.01082	-6.98104	-12.4871	NA	12.2069	30.9313
Combined 1.3 - reactome_HDACs_deacetylate_histones_Main_Pathway	NA	0.180399	28.8932		21.7325	19.8541	1.99284		NA	NA		-22.5399	NA	-27.7196	-10.2971	-12.3429	NA	-8.60817	-19.7095
Combined 1.3 - reactome_Hyaluronan_biosynthesis_and_export_Main_Pathway	NA	31.7306	2.98396		31.3784	21.4124	NA		NA	NA		-5.97197	NA	26.8418	5.23526	42.5091	NA	14.8047	10.4907
Combined 1.3 - reactome_Inflammasomes_Main_Pathway	-17.3504	13.4929	39.527		36.156	27.0826	-2.19755		NA	NA		NA	NA	-25.0179	35.3744	45.4319	NA	19.9003	-38.0389
Combined 1.3 - reactome_NGF_processing_Main_Pathway	NA	5.77613	29.0811		31.8806	35.5536	-8.57177		NA	NA		-18.1192	NA	-22.1928	12.9853	37.2709	NA	-1.61842	-42.037
Combined 1.3 - reactome_Packaging_Of_Telomere_Ends_Main_Pathway	NA	0.538831	27.5286		17.7607	18.6388	1.63132		NA	NA		-21.1552	NA	-26.089	-9.86664	-11.3518	NA	-8.93647	-15.8782
Combined 1.3 - reactome_Phosphorylation_of_Emi1_Main_Pathway	NA	-6.62622	29.938		32.9492	22.1995	1.72953		NA	NA		-31.0445	NA	-35.6932	-19.2954	-5.44814	NA	-10.9038	-31.2739
Combined 1.3 - reactome_PRC2_methylates_histones_and_DNA_Main_Pathway	NA	-1.96687	26.6174		22.3033	19.0289	1.82524		NA	NA		-20.36	NA	-27.5558	-13.0088	-11.87	NA	-9.45132	-20.2496
Combined 1.3 - reactome_Proton_oligopeptide_cotransporters_Main_Pathway	-31.7923	NA	-47.5063		-34.844	-43.9393	-24.7024		NA	NA		13.9296	NA	5.02165	-28.9156	0.502507	NA	-8.44735	13.1261
Combined 1.3 - reactome_RNA_Polymerase_I_Promoter_Opening_Main_Pathway	-5.67726	0.832832	-31.3703		-23.034	-22.1137	-2.52866		NA	NA		25.1373	NA	30.994	12.1353	10.9724	NA	9.04744	20.2573
Combined 1.3 - reactome_Scavenging_by_Class_B_Receptors_Main_Pathway	-22.7517	16.2925	-53.6081		9.00516	23.2041	7.93102		NA	8.15234		28.1509	NA	NA	26.908	12.534	NA	16.0418	-1.62893
Combined 1.3 - reactome_Switching_of_origins_to_a_post_replicative_state_Main_Pathway	NA	-8.78362	25.3446		43.39	28.4106	1.24296		NA	NA		-20.2188	NA	-32.8562	-23.4357	-5.94798	NA	-13.255	-41.6729
Combined 1.3 - reactome_Telomere_C_strand_synthesis_initiation_Main_Pathway	NA	-0.358484	32.0559		44.9772	35.0734	10.6242		NA	15.5228		-31.6997	NA	-31.1049	-8.27733	19.5008	NA	2.82069	-34.2791
Combined 1.3 - reactome_Thyroxine_biosynthesis_Main_Pathway	NA	5.14546	10.8015		-25.7407	10.1073	7.43019		NA	7.7432		-5.77623	NA	-4.21738	2.90855	4.66294e-14	NA	6.35482	36.1565
Combined 1.3 - reactome_Type_I_hemidesmosome_assembly_Main_Pathway	-10.6436	NA	41.1303		54.5716	43.5492	NA		NA	NA		-53.0364	NA	-7.10125	NA	NA	NA	49.5432	-10.0147
Combined 1.3 - reactome_Unwinding_of_DNA_Main_Pathway	NA	-2.96644	33.0539		47.9338	38.3815	5.40996		NA	NA		-28.1893	NA	-34.7034	-15.1238	7.00567	NA	-6.74897	-42.2979
Combined 1.3 - serine_and_glycine_biosynthesis	NA	2.17749	26.1143		26.0194	28.1818	-4.52546		NA	NA		-25.877	NA	-23.3057	19.1035	-8.74463	NA	12.4792	-29.9327
Combined 1.3 - superoxide_radicals_degradation	-8.02045	NA	-35.4853		-34.1101	-21.7353	-27.826		NA	0.304711		27.7817	NA	10.1146	-26.9682	-21.354	NA	-28.6561	6.96261
Combined 1.3 - thyroid_hormone_biosynthesis	NA	-34.7545	-54.0678		-63.0785	-83.143	-24.1939		NA	7.3932		66.3523	NA	18.6389	-50.9893	-90.8051	NA	-40.3577	38.7504
Combined 1.3 - Transport_between_Cytoplasm_and_Mitochondria	NA	-29.7656	-73.9689		-76.2216	-76.7064	-49.9755		NA	6.0401		75.2869	NA	41.4525	-36.6538	-78.9558	NA	-57.2812	26.6801

## Sheet: Table S4 RNAseq_127
log2FoldChange	cetuximab_sd_vs_no	cetuximab_egf_vs_no	cetuximab_vs_no		erlotinib_vs_no	egf_erlotinib_vs_no	sd_erlotinib_vs_no	egf_vs_no	sd_vs_no		sd_erlotinib_vs_erlotinib	sd_erlotinib_vs_sd	cetuximab_egf_vs_cetuximab	cetuximab_egf_vs_egf	cetuximab_sd_vs_cetuximab	cetuximab_sd_vs_sd	egf_erlotinib_vs_egf	egf_erlotinib_vs_erlotinib
ACTN1	NA	NA	1.11256		1.20472	NA	NA	NA	NA		NA	NA	-1.31064	NA	NA	NA	1.26672	NA			Actinin Alpha 1		F-actin cross-linking protein which is thought to anchor actin to a variety of intracellular structures. This is a bundling protein.	Prognostic marker in renal cancer (unfavorable), lung cancer (unfavorable), head and neck cancer (unfavorable) and urothelial cancer (unfavorable)	Cytogenetic location: 14q24.1 Genomic coordinates (GRCh38): 14:68,874,128-68,979,302
ADGRV1	NA	NA	-1.56345		-1.25061	NA	NA	NA	NA		NA	NA	1.53031	NA	NA	NA	NA	NA			Adhesion G Protein-Coupled Receptor V1		G-protein coupled receptor which has an essential role in the development of hearing and vision. By far is the largest known cell surface protein. Required for the hair bundle ankle formation, which connects growing stereocilia in developing cochlear hair cells of the inner ear.	Gene product is not prognostic in cancer	Cytogenetic location: 5q14.3 Genomic coordinates (GRCh38): 5:90,558,797-91,164,437
ALDH1A1	NA	NA	-5.64698		-3.58387	NA	NA	NA	NA		NA	NA	3.74711	NA	NA	NA	NA	NA			Aldehyde Dehydrogenase 1 Family Member A1		Cytosolic dehydrogenase that catalyzes the irreversible oxidation of a wide range of aldehydes to their corresponding carboxylic acid (PubMed:19296407, PubMed:12941160, PubMed:15623782, PubMed:17175089, PubMed:26373694, PubMed:25450233).	NaN	NaN
ARHGEF37	NA	NA	-1.33543		-1.26312	NA	NA	NA	NA		NA	NA	1.28016	NA	NA	NA	NA	NA		ARHGEF37 (Rho Guanine Nucleotide Exchange Factor 37)	is a Protein Coding gene. Diseases associated with ARHGEF37 include Epidermolysis Bullosa Simplex 1A, Generalized Severe. Among its related pathways are p75 NTR receptor-mediated signalling and GPCR downstream signalling. Gene Ontology (GO) annotations related to this gene include guanyl-nucleotide exchange factor activity. An important paralog of this gene is ARHGEF38.		May act as a guanine nucleotide exchange factor (GEF).	Prognostic marker in renal cancer (favorable)	NaN
ARID5B	NA	NA	-1.74294		-1.14575	NA	NA	NA	NA		NA	NA	1.49936	NA	1.11101	-1.06256	NA	NA		AT-Rich Interaction Domain 5B	This gene encodes a member of the AT-rich interaction domain (ARID) family of DNA binding proteins. The encoded protein forms a histone H3K9Me2 demethylase complex with PHD finger protein 2 and regulates the transcription of target genes involved in adipogenesis and liver development. This gene also plays a role in cell growth and differentiation of B-lymphocyte progenitors, and single nucleotide…		Transcription coactivator that binds to the 5'-AATA[CT]-3' core sequence and plays a key role in adipogenesis and liver development. Acts by forming a complex with phosphorylated PHF2, which mediates demethylation at Lys-336, leading to target the PHF2-ARID5B complex to target promoters, where PHF2 mediates demethylation of dimethylated 'Lys-9' of histone H3 (H3K9me2), followed by transcription a…	Gene product is not prognostic (cancer)	Cytogenetic location: 10q21.2 Genomic coordinates (GRCh38): 10:61,901,699-62,096,944
C15orf39	NA	NA	1.12444		1.00208	NA	NA	NA	NA		NA	NA	-1.61204	NA	NA	NA	NA	NA		Chromosome 15 Open Reading Frame 39	Located in cytosol.		NaN	Prognostic marker in renal cancer (unfavorable), testis cancer (unfavorable) and melanoma (favorable)	NaN
C2CD2L	NA	NA	1.11632		1.2929	NA	NA	NA	NA		NA	NA	-1.42127	NA	NA	NA	1.18067	NA		C2CD2 Like	Enables phosphatidylinositol binding activity and phosphatidylinositol transfer activity. Involved in positive regulation of insulin secretion involved in cellular response to glucose stimulus. Located in cortical endoplasmic reticulum and endoplasmic reticulum-plasma membrane contact site. Colocalizes with cytoplasmic side of apical plasma membrane.		Lipid-binding protein that transports phosphatidylinositol, the precursor of phosphatidylinositol 4,5-bisphosphate (PI(4,5)P2), from its site of synthesis in the endoplasmic reticulum to the cell membrane	Prognostic marker in renal cancer (unfavorable) and endometrial cancer (favorable)	Cytogenetic location: 11q23.3 Genomic coordinates (GRCh38): 11:119,102,249-119,118,544. C2CD2L localizes to attachment sites between the endoplasmic reticulum (ER) and plasma membrane and transfers phosphatidylinositol from the ER to the plasma membrane for replenishment of phosphatidylinositol (4,5)bisphosphate (PI(4,5)P2) pools
CAMK2N1	NA	NA	-1.19121		-1.13133	NA	NA	NA	NA		1.68145	NA	1.23353	NA	NA	NA	NA	NA		Calcium/calmodulin-dependent protein kinase II inhibitor 1	Enables calcium-dependent protein kinase inhibitor activity and protein kinase binding activity. Involved in several processes, including negative regulation of ERK1 and ERK2 cascade; negative regulation of cell population proliferation; and negative regulation of cellular protein metabolic process. Predicted to be located in synapse. Implicated in ovarian cancer; ovarian carcinoma; and prostate …		Modulates blood pressure and vascular reactivity via regulation of CAMK2 activity in addition to regulation of left ventricular mass (PubMed:31327268). Mediates the NLRP3 inflammasome in cardiomyocytes via acting as an inhibitor of the MAPK14/p38 and MAPK8/JNK pathways, thereby regulating ventricular remodeling and cardiac rhythm post-myocardial infarction (By similarity).	Prognostic marker in head and neck cancer (unfavorable), lung cancer (unfavorable) and liver cancer (unfavorable)	Cytogenetic location: 1p36.12 Genomic coordinates (GRCh38): 1:20,482,391-20,486,210 (from NCBI) Cytogenetic location: 1p36.12 Genomic coordinates (GRCh38): 1:20,482,391-20,486,210 (from NCBI) Cytogenetic location: 1p36.12 Genomic coordinates (GRCh38): 1:20,482,391-20,486,210 (from NCBI)
CBLB	NA	NA	-1.01366		-1.00495	NA	NA	NA	NA		NA	NA	1.07137	NA	1.00022	NA	NA	NA		Cbl proto-oncogene B	This gene encodes an E3 ubiquitin-protein ligase which promotes proteosome-mediated protein degradation by transferring ubiquitin from an E2 ubiquitin-conjugating enzyme to a substrate. The encoded protein is involved in the regulation of immune response by limiting T-cell receptor, B-cell receptor, and high affinity immunoglobulin epsilon receptor activation. Studies in mouse suggest that this g…		E3 ubiquitin-protein ligase which accepts ubiquitin from specific E2 ubiquitin-conjugating enzymes, and transfers it to substrates, generally promoting their degradation by the proteasome. Negatively regulates TCR (T-cell receptor), BCR (B-cell receptor) and FCER1 (high affinity immunoglobulin epsilon receptor) signal transduction pathways. In naive T-cells, inhibits VAV1 activation upon TCR enga…	Gene product is not prognostic	Cytogenetic location: 3q13.11 Genomic coordinates (GRCh38): 3:105,655,461-105,869,449 CBLB is a key regulator of peripheral immune tolerance by limiting T-cell activation and expansion through its E3 ubiquitin ligase activity
CEBPA	NA	NA	-1.17816		-1.36668	NA	NA	NA	NA		NA	-1.3796	1.49124	NA	NA	-1.11871	-1.3937	NA		CCAAT Enhancer Binding Protein Alpha	This intronless gene encodes a transcription factor that contains a basic leucine zipper (bZIP) domain and recognizes the CCAAT motif in the promoters of target genes. The encoded protein functions in homodimers and also heterodimers with CCAAT/enhancer-binding proteins beta and gamma. Activity of this protein can modulate the expression of genes involved in cell cycle regulation as well as in bo…		Transcription factor that coordinates proliferation arrest and the differentiation of myeloid progenitors, adipocytes, hepatocytes, and cells of the lung and the placenta. To regulate gluconeogenesis, functionally cooperates with FOXO1 binding to IRE-controlled promoters and regulating the expression of target genes such as PCK1 or G6PC1.	Gene product is not prognostic	Cytogenetic location: 19q13.11 Genomic coordinates (GRCh38): 19:33,299,934-33,302,534
CKB	NA	NA	-1.68854		-1.62867	NA	NA	NA	NA		NA	-1.33168	1.83427	NA	NA	-1.74083	NA	NA		Creatine Kinase B	The protein encoded by this gene is a cytoplasmic enzyme involved in energy homeostasis. The encoded protein reversibly catalyzes the transfer of phosphate between ATP and various phosphogens such as creatine phosphate. It acts as a homodimer in brain as well as in other tissues, and as a heterodimer with a similar muscle isozyme in heart. The encoded protein is a member of the ATP:guanido phosph…		Catalyzes the first step in phosphatidylcholine biosynthesis. Phosphorylates choline.	Prognostic marker in renal cancer (favorable)	Cytogenetic location: 14q32.33 Genomic coordinates (GRCh38): 14:103,519,667-103,522,830
CLCF1	NA	NA	1.33177		1.10892	NA	NA	NA	NA		NA	NA	-1.30471	NA	NA	NA	NA	NA		Cardiotrophin Like Cytokine Factor 1	This gene is a member of the glycoprotein (gp)130 cytokine family and encodes cardiotrophin-like cytokine factor 1 (CLCF1). CLCF1 forms a heterodimer complex with cytokine receptor-like factor 1 (CRLF1). This dimer competes with ciliary neurotrophic factor (CNTF) for binding to the ciliary neurotrophic factor receptor (CNTFR) complex, and activates the Jak-STAT signaling cascade. CLCF1 can be act…		In complex with CRLF1, forms a heterodimeric neurotropic cytokine that plays a crucial role during neuronal development (Probable). Also stimulates B-cells. Binds to and activates the ILST/gp130 receptor.	Prognostic marker in glioma (unfavorable)	Cytogenetic location: 11q13.2 Genomic coordinates (GRCh38): 11:67,364,168-67,374,177
CROT	NA	NA	-1.06615		-1.01225	NA	NA	NA	NA		NA	NA	1.21271	NA	NA	NA	-1.05459	NA		Carnitine O-Octanoyltransferase	This gene encodes a member of the carnitine/choline acetyltransferase family. The encoded protein converts 4,8-dimethylnonanoyl-CoA to its corresponding carnitine ester. This transesterification occurs in the peroxisome and is necessary for transport of medium- and long- chain acyl-CoA molecules out of the peroxisome to the cytosol and mitochondria. The protein thus plays a role in lipid metaboli…		Beta-oxidation of fatty acids. The highest activity concerns the C6 to C10 chain length substrate. Converts the end product of pristanic acid beta oxidation, 4,8-dimethylnonanoyl-CoA, to its corresponding carnitine ester.	Prognostic marker in renal cancer (favorable) and urothelial cancer (favorable)	Cytogenetic location: 7q21.12 Genomic coordinates (GRCh38): 7:87,345,664-87,399,794
CYBRD1	NA	NA	-1.12076		-1.45425	NA	NA	NA	NA		NA	NA	1.24539	NA	NA	NA	NA	NA		Plasma membrane ascorbate-dependent reductase CYBRD1	This gene is a member of the cytochrome b(561) family that encodes an iron-regulated protein. It highly expressed in the duodenal brush border membrane. It has ferric reductase activity and is believed to play a physiological role in dietary iron absorption.		Plasma membrane reductase that uses cytoplasmic ascorbate as an electron donor to reduce extracellular Fe3+ into Fe2+. Probably functions in dietary iron absorption at the brush border of duodenal enterocytes by producing Fe2+, the divalent form of iron that can be transported into enterocytes. It is also able to reduce extracellular monodehydro-L-ascorbate and may be involved in extracellular as…	Prognostic summary Gene product is not prognostic Cancer specificityi Low cancer specificity Cell line expression clusteri Fibroblasts - Metabolism (mainly) Cell line specificityi Low cancer specificity	Cytogenetic location: 2q31.1 Genomic coordinates (GRCh38): 2:171,522,233-171,558,129
DDX39A	NA	NA	1.01852		1.00324	NA	NA	NA	NA		NA	NA	-1.03867	NA	NA	NA	NA	NA		ATP-dependent RNA helicase DDX39A	This gene encodes a member of the DEAD box protein family. These proteins are characterized by the conserved motif Asp-Glu-Ala-Asp (DEAD) and are putative RNA helicases. They are implicated in a number of cellular processes involving alteration of RNA secondary structure, such as translation initiation, nuclear and mitochondrial splicing, and ribosome and spliceosome assembly. Based on their dist…		Involved in pre-mRNA splicing. Required for the export of mRNA out of the nucleus.	Moderate nuclear and cytoplasmic staining was observed in few gliomas, melanomas, testicular, skin, breast, endometrial and urothelial cancers. Remaining cancers were generally negative.	Cytogenetic location: 19p13.12 Genomic coordinates (GRCh38): 19:14,408,798-14,419,383
DSG3	NA	NA	-1.02517		-1.24338	NA	NA	NA	NA		NA	NA	1.20453	NA	NA	NA	NA	NA		Desmoglein 3	This gene encodes a member of the desmoglein family and cadherin cell adhesion molecule superfamily of proteins. Desmogleins are calcium-binding transmembrane glycoprotein components of desmosomes, cell-cell junctions between epithelial, myocardial, and other cell types. The encoded preproprotein is proteolytically processed to generate the mature glycoprotein. This gene is present in a gene clus…		Component of intercellular desmosome junctions. Involved in the interaction of plaque proteins and intermediate filaments mediating cell-cell adhesion.	Desmoglein 3 Prognostic summary Prognostic marker in pancreatic cancer (unfavorable) and urothelial cancer (unfavorable) Cancer specificityi Cancer enhanced (cervical cancer, head and neck cancer) Cell line expression clusteri Keratinocytes - Epithelial cell function (mainly) Cell line specificityi Cancer enhanced (Esophageal cancer, Gallbladder cancer, Head and neck cancer)	Cytogenetic location: 18q12.1 Genomic coordinates (GRCh38): 18:31,447,741-31,478,702 Cancer specificityi Cancer enhanced (cervical cancer, head and neck cancer) Cell line expression clusteri Keratinocytes - Epithelial cell function (mainly) Cell line specificityi Cancer enhanced (Esophageal cancer, Gallbladder cancer, Head and neck cancer)
EXOSC4	NA	NA	1.12895		1.35114	NA	NA	NA	NA		NA	NA	-1.24755	NA	NA	NA	NA	NA		Exosome complex component RRP41	Enables mRNA 3'-UTR AU-rich region binding activity. Involved in nucleic acid metabolic process and positive regulation of cell growth. Acts upstream of or within defense response to virus. Located in cytosol; nucleoplasm; and transcriptionally active chromatin. Part of exosome (RNase complex).		Non-catalytic component of the RNA exosome complex which has 3'->5' exoribonuclease activity and participates in a multitude of cellular RNA processing and degradation events. In the nucleus, the RNA exosome complex is involved in proper maturation of stable RNA species such as rRNA, snRNA and snoRNA, in the elimination of RNA processing by-products and non-coding 'pervasive' transcripts, such as…	Prognostic summary Prognostic marker in ovarian cancer (favorable) Cancer specificityi Low cancer specificity Cell line expression clusteri Non-specific - Basic cellular processes (mainly) Cell line specificityi Low cancer specificity	Cytogenetic location: 8q24.3 Genomic coordinates (GRCh38): 8:144,064,056-144,080,648		doubt
FAM212B	NA	NA	-1.10142		-1.05127	NA	NA	NA	NA		NA	NA	1.34203	NA	NA	NA	-1.14001	NA		Inka Box Actin Regulator 2	Enables protein kinase binding activity. Predicted to be involved in negative regulation of catalytic activity. Located in nucleoplasm.		Inhibitor of the serine/threonine-protein kinase PAK4. Acts by binding PAK4 in a substrate-like manner, inhibiting the protein kinase activity.	Prognostic summary Prognostic marker in head and neck cancer (favorable) Cancer specificityi Cancer enhanced (glioma) Cell line expression clusteri Connective tissue cells - ECM organization (mainly) Cell line specificityi Low cancer specificity	NaN
FLG-AS1	NA	NA	-2.67654		-4.08617	NA	NA	NA	NA		2.36918	NA	2.97919	NA	NA	NA	NA	NA			FLG Antisense RNA 1 FLG-AS1 (FLG Antisense RNA 1) is an RNA Gene, and is affiliated with the lncRNA class. Diseases associated with FLG-AS1 include Ichthyosis Vulgaris and Peeling Skin Syndrome 6.		NaN	NaN	NaN
GBP6	NA	NA	-1.24743		-1.32399	NA	NA	NA	NA		NA	-1.2061	1.74437	NA	NA	-1.12158	-1.56287	NA		Guanylate Binding Protein Family Member 6	Guanylate-binding proteins, such as GBP6, are induced by interferon and hydrolyze GTP to both GDP and GMP		Hydrolyzes GTP to GMP in 2 consecutive cleavage reactions (By similarity). Confers protection to several pathogens, including the bacterial pathogens Listeria monocytogenes and Mycobacterium bovis BCG as well as the protozoan pathogen Toxoplasma gondii (By similarity).	Prognostic summary Gene product is not prognostic Cancer specificityi Group enriched (cervical cancer, head and neck cancer, lung cancer) Cell line expression clusteri Keratinocytes - Epithelial cell function (mainly) Cell line specificityi Cancer enhanced (Cervical cancer, Esophageal cancer, Gallbladder cancer, Head and neck cancer)	Cytogenetic location: 1p22.2 Genomic coordinates (GRCh38): 1:89,364,059-89,388,160
GLIS2	NA	NA	1.12344		1.3015	NA	NA	NA	NA		NA	NA	-1.0413	NA	NA	NA	NA	NA		Zinc finger protein GLIS2	This gene is a member of the GLI-similar zinc finger protein family and encodes a nuclear transcription factor with five C2H2-type zinc finger domains. The protein encoded by this gene is widely expressed at low levels in the neural tube and peripheral nervous system and likely promotes neuronal differentiation. It is abundantly expressed in the kidney and may have a role in the regulation of kid…		Can act either as a transcriptional repressor or as a transcriptional activator, depending on the cell context. Acts as a repressor of the Hedgehog signaling pathway (By similarity). Represses the Hedgehog-dependent expression of Wnt4 (By similarity). Necessary to maintain the differentiated epithelial phenotype in renal cells through the inhibition of SNAI1, which itself induces the epithelial-t…	Prognostic summary Prognostic marker in renal cancer (favorable) and endometrial cancer (unfavorable) Cancer specificityi Low cancer specificity Cell line expression clusteri Kidney - Mixed function (mainly) Cell line specificityi Low cancer specificity	Cytogenetic location: 16p13.3 Genomic coordinates (GRCh38): 16:4,314,761-4,339,595		doubt
GNB1L	NA	NA	1.32059		1.38476	NA	NA	NA	NA		NA	NA	-1.16767	NA	NA	NA	NA	NA		Guanine nucleotide-binding protein subunit beta-like protein 1	This gene encodes a G-protein beta-subunit-like polypeptide which is a member of the WD repeat protein family. WD repeats are minimally conserved regions of approximately 40 amino acids typically bracketed by gly-his and trp-asp (GH-WD), which may facilitate formation of heterotrimeric or multiprotein complexes. Members of this family are involved in a variety of cellular processes, including cel…		NaN	Prognostic summary Gene product is not prognostic Cancer specificityi Low cancer specificity Cell line expression clusteri Non-specific - Unknown function (mainly) Cell line specificityi Low cancer specificity	Cytogenetic location: 22q11.21 Genomic coordinates (GRCh38): 22:19,783,223-19,854,874 (from NCBI)
GPNMB	NA	NA	-1.71113		-2.23158	NA	NA	NA	NA		1.85813	-1.35057	2.84431	NA	NA	-1.37246	-2.52461	NA		Transmembrane glycoprotein NMB					Cytogenetic location: 7p15.3 Genomic coordinates (GRCh38): 7:23,246,775-23,275,108
H19	NA	NA	-4.08436		-2.28048	NA	NA	NA	NA		2.22892	NA	5.61262	NA	NA	-3.58789	-3.90562	NA		H19 Imprinted Maternally Expressed Transcript	This gene is located in an imprinted region of chromosome 11 near the insulin-like growth factor 2 (IGF2) gene. This gene is only expressed from the maternally-inherited chromosome, whereas IGF2 is only expressed from the paternally-inherited chromosome. The product of this gene is a long non-coding RNA which functions as a tumor suppressor. Mutations in this gene have been associated with Beckwi…		NaN	NaN	NaN
HSD11B2	NA	NA	1.35843		1.55833	NA	NA	NA	NA		NA	NA	-1.49435	NA	NA	NA	NA	NA		Hydroxysteroid 11-Beta Dehydrogenase 2	There are at least two isozymes of the corticosteroid 11-beta-dehydrogenase, a microsomal enzyme complex responsible for the interconversion of cortisol and cortisone. The type I isozyme has both 11-beta-dehydrogenase (cortisol to cortisone) and 11-oxoreductase (cortisone to cortisol) activities. The type II isozyme, encoded by this gene, has only 11-beta-dehydrogenase activity. In aldosterone-se…		NaN	Prognostic summary Prognostic marker in renal cancer (favorable) Cancer specificityi Cancer enhanced (renal cancer) Cell line expression clusteri Stomach & Colon cancer - Absorption (mainly) Cell line specificityi Cancer enhanced (Colorectal cancer, Prostate cancer)	Cytogenetic location: 16q22.1 Genomic coordinates (GRCh38): 16:67,429,801-67,437,553
IL1A	NA	NA	1.66688		1.21355	NA	NA	NA	NA		NA	1.40665	-3.28482	NA	NA	1.94316	3.36509	NA		Interleukin-1 alpha	The protein encoded by this gene is a member of the interleukin 1 cytokine family. This cytokine is a pleiotropic cytokine involved in various immune responses, inflammatory processes, and hematopoiesis. This cytokine is produced by monocytes and macrophages as a proprotein, which is proteolytically processed and released in response to cell injury, and thus induces apoptosis. This gene and eight…		Cytokine constitutively present intracellularly in nearly all resting non-hematopoietic cells that plays an important role in inflammation and bridges the innate and adaptive immune systems (PubMed:26439902). After binding to its receptor IL1R1 together with its accessory protein IL1RAP, forms the high affinity interleukin-1 receptor complex	Prognostic summary Prognostic marker in lung cancer (unfavorable), stomach cancer (unfavorable) and cervical cancer (unfavorable) Cancer specificityi Cancer enhanced (head and neck cancer, urothelial cancer) Cell line expression clusteri Keratinocytes - Epithelial cell function (mainly) Cell line specificityi Cancer enhanced (Gallbladder cancer, Head and neck cancer)	Cytogenetic location: 2q14.1 Genomic coordinates (GRCh38): 2:112,773,925-112,784,493
IL23A	NA	NA	2.42223		1.89194	NA	NA	NA	NA		NA	1.66796	-3.66641	NA	NA	2.3342	NA	NA		Interleukin-23 subunit alpha	This gene encodes a subunit of the heterodimeric cytokine interleukin 23 (IL23). IL23 is composed of this protein and the p40 subunit of interleukin 12 (IL12B). The receptor of IL23 is formed by the beta 1 subunit of IL12 (IL12RB1) and an IL23 specific subunit, IL23R. Both IL23 and IL12 can activate the transcription activator STAT4, and stimulate the production of interferon-gamma (IFNG). In con…		Associates with IL12B to form the pro-inflammatory cytokine IL-23 that plays different roles in innate and adaptive immunity (PubMed:11114383). Released by antigen-presenting cells such as dendritic cells or macrophages, binds to a heterodimeric receptor complex composed of IL12RB1 and IL23R to activate JAK2 and TYK2 which then phosphorylate the receptor to form a docking site leading to the phos…	Prognostic summary Gene product is not prognostic Cancer specificityi Low cancer specificity Cell line expression clusteri DU4475 - Unknown function (mainly) Cell line specificityi Low cancer specificity	Cytogenetic location: 12q13.3 Genomic coordinates (GRCh38): 12:56,338,884-56,340,410
ITM2B	NA	NA	-1.10363		-1.3471	NA	NA	NA	NA		NA	NA	1.2272	NA	NA	NA	-1.03757	NA		Integral membrane protein 2B	Amyloid precursor proteins are processed by beta-secretase and gamma-secretase to produce beta-amyloid peptides which form the characteristic plaques of Alzheimer disease. This gene encodes a transmembrane protein which is processed at the C-terminus by furin or furin-like proteases to produce a small secreted peptide which inhibits the deposition of beta-amyloid. Mutations which result in extens…		Plays a regulatory role in the processing of the amyloid-beta A4 precursor protein (APP) and acts as an inhibitor of the amyloid-beta peptide aggregation and fibrils deposition. Plays a role in the induction of neurite outgrowth. Functions as a protease inhibitor by blocking access of secretases to APP cleavage sites. Mature BRI2 (mBRI2) functions as a modulator of the amyloid-beta A4 precursor p…	Prognostic summary Prognostic marker in renal cancer (favorable) Cancer specificityi Low cancer specificity Cell line expression clusteri Kidney - Mixed function (mainly) Cell line specificityi Low cancer specificity	Cytogenetic location: 13q14.2 Genomic coordinates (GRCh38): 13:48,233,206-48,270,357
KAT2B	NA	NA	-1.111		-1.15246	NA	NA	NA	NA		NA	NA	1.10105	NA	NA	NA	NA	NA		Histone acetyltransferase KAT2B	CBP and p300 are large nuclear proteins that bind to many sequence-specific factors involved in cell growth and/or differentiation, including c-jun and the adenoviral oncoprotein E1A. The protein encoded by this gene associates with p300/CBP. It has in vitro and in vivo binding activity with CBP and p300, and competes with E1A for binding sites in p300/CBP. It has histone acetyl transferase activ…		Functions as a histone acetyltransferase (HAT) to promote transcriptional activation (PubMed:8945521). Has significant histone acetyltransferase activity with core histones (H3 and H4), and also with nucleosome core particles (PubMed:8945521). Also acetylates non-histone proteins, such as ACLY, MAPRE1/EB1, PLK4, RRP9/U3-55K and TBX5 (PubMed:9707565, PubMed:10675335, PubMed:23001180, PubMed:277963…	Prognostic summary Gene product is not prognostic Cancer specificityi Low cancer specificity Cell line expression clusteri Skin cancer - Membrane components (mainly) Cell line specificityi Cancer enhanced (Skin cancer)	Cytogenetic location: 3p24.3 Genomic coordinates (GRCh38): 3:20,040,446-20,154,404		CBP and p300 are large nuclear proteins that bind to many sequence-specific factors involved in cell growth and/or differentiation, including c-jun and the adenoviral oncoprotein E1A. The protein encoded by this gene associates with p300/CBP. It has in vitro and in vivo binding activity with CBP and p300, and competes with E1A for binding sites in p300/CBP. It has histone acetyl transferase activ…
KIAA0513	NA	NA	-1.23278		-1.15881	NA	NA	NA	NA		1.01489	NA	1.21199	NA	NA	NA	-1.0241	NA		Uncharacterized protein KIAA0513	Predicted to be located in cytoplasm.		NaN	Prognostic summary Prognostic marker in pancreatic cancer (favorable) Cancer specificityi Low cancer specificity Cell line expression clusteri Non-specific - Unknown function (mainly) Cell line specificityi Low cancer specificity	Cytogenetic location: 16q24.1 Genomic coordinates (GRCh38): 16:85,027,795-85,094,230
KIAA1211L	NA	NA	-2.11867		-2.38873	NA	NA	NA	NA		NA	NA	3.73505	NA	NA	NA	-5.49072	NA			CRACD Like		NaN	Prognostic summary Prognostic marker in renal cancer (favorable) and thyroid cancer (favorable) Cancer specificityi Low cancer specificity Cell line expression clusteri Non-specific - Cilium assembly (mainly) Cell line specificityi Low cancer specificity	Cytogenetic location: 4q12 Genomic coordinates (GRCh38): 4:56,049,098-56,330,609 KIAA1211 encodes an actin cytoskeletal regulator involved in maintaining epithelial cell integrity and suppressing tumorigenesis
KIAA1841	NA	NA	-1.04243		-1.05374	NA	NA	NA	NA		NA	NA	1.24742	NA	NA	NA	-1.02433	NA		SANT and BTB domain regulator of class switch recombination	SANBR (SANT And BTB Domain Regulator Of CSR) is a Protein Coding gene. Diseases associated with SANBR include Peroxisome Biogenesis Disorder 11A and St2 Diffuse Large B-Cell Lymphoma.		Negatively regulates class switch recombination or isotype switching in splenic B-cells	Prognostic summary Gene product is not prognostic Cancer specificityi Low cancer specificity Cell line expression clusteri Rhabdoid cancers - Neuronal signaling (mainly) Cell line specificityi Low cancer specificity	Cytogenetic location: 2p15 Genomic coordinates (GRCh38): 2:61,065,871-61,138,032
KRT81	NA	NA	1.06002		1.24728	NA	NA	NA	NA		-1.32789	NA	-1.48324	NA	-1.05181	NA	1.21265	NA		Keratin, type II cuticular Hb1	The protein encoded by this gene is a member of the keratin gene family. As a type II hair keratin, it is a basic protein which heterodimerizes with type I keratins to form hair and nails. The type II hair keratins are clustered in a region of chromosome 12q13 and are grouped into two distinct subfamilies based on structure similarity. One subfamily, consisting of KRTHB1, KRTHB3, and KRTHB6, is h…		There are two types of hair/microfibrillar keratin, I (acidic) and II (neutral to basic).	Prognostic summary Gene product is not prognostic Cancer specificityi Cancer enhanced (breast cancer, cervical cancer) Cell line expression clusteri Non-specific - Enzymes (mainly) Cell line specificityi Cancer enhanced (Breast cancer)	Cytogenetic location: 12q13.13 Genomic coordinates (GRCh38): 12:52,285,913-52,308,624
MIDN	NA	NA	1.33478		1.21613	NA	NA	NA	NA		NA	NA	-1.56477	NA	NA	NA	NA	NA		Midnolin	Predicted to enable kinase binding activity. Predicted to be involved in negative regulation of glucokinase activity and negative regulation of insulin secretion. Located in cytoplasm and nucleus		Facilitates ubiquitin-independent proteasomal degradation of polycomb protein CBX4 (PubMed:27326929). Plays a role in inhibiting the activity of glucokinase GCK and both glucose-induced and basal insulin secretion (By similarity).	Prognostic summary Gene product is not prognostic Cancer specificityi Low cancer specificity Cell line expression clusteri Stomach & Colon cancer - Absorption (mainly) Cell line specificityi Low cancer specificity	Cytogenetic location: 19p13.3 Genomic coordinates (GRCh38): 19:1,248,583-1,259,143
MPP7	NA	NA	-1.00011		-1.29217	NA	NA	NA	NA		NA	NA	1.59938	NA	1.10171	NA	-1.28268	NA		MAGUK p55 subfamily member 7	The protein encoded by this gene is a member of the p55 Stardust family of membrane-associated guanylate kinase (MAGUK) proteins, which function in the establishment of epithelial cell polarity. This family member forms a complex with the polarity protein DLG1 (discs, large homolog 1) and facilitates epithelial cell polarity and tight junction formation. Polymorphisms in this gene are associated …		Acts as an important adapter that promotes epithelial cell polarity and tight junction formation via its interaction with DLG1. Involved in the assembly of protein complexes at sites of cell-cell contact.	Prognostic summary Prognostic marker in renal cancer (favorable) and lung cancer (favorable) Cancer specificityi Low cancer specificity Cell line expression clusteri Keratinocytes - Epithelial cell function (mainly) Cell line specificityi Low cancer specificity	Cytogenetic location: 10p12.1 Genomic coordinates (GRCh38): 10:28,050,993-28,335,203
MROH2A	NA	NA	-2.6559		-2.4538	NA	NA	NA	NA		NA	NA	3.38646	NA	NA	NA	NA	NA		Maestro heat-like repeat-containing protein family member 2A	Maestro Heat Like Repeat Family Member 2A. This gene encodes a HEAT-domain-containing protein. The function of the encoded protein has not been characterized.		NaN	Prognostic summary Gene product is not prognostic Cancer specificityi Cancer enhanced (urothelial cancer) Cell line expression clusteri Non-specific - Enzymes (mainly) Cell line specificityi Cancer enhanced (Bone cancer)	NaN
MROH8	NA	NA	-1.80163		-1.35561	NA	NA	NA	NA		NA	NA	1.97784	NA	NA	NA	NA	NA		Maestro Heat Like Repeat Family Member 8	The protein encoded by this gene belongs to the maestro heat-like repeat family. The exact function of this gene is not known, however, in a genome-wide association study using hippocampal atrophy as a quantitative trait, this gene has been associated with Alzheimer's disease (PMID:19668339). Alternatively spliced transcript variants encoding different isoforms have been found for this gene.		NaN	Prognostic summary Gene product is not prognostic Cancer specificityi Low cancer specificity Cell line expression clusteri Spermatids - Smell perception (mainly) Cell line specificityi Low cancer specificity	NaN
NCOA3	NA	NA	-1.24954		-1.22395	NA	NA	NA	NA		NA	NA	1.56905	NA	NA	NA	NA	NA		Nuclear receptor coactivator 3	The protein encoded by this gene is a nuclear receptor coactivator that interacts with nuclear hormone receptors to enhance their transcriptional activator functions. The encoded protein has histone acetyltransferase activity and recruits p300/CBP-associated factor and CREB binding protein as part of a multisubunit coactivation complex. This protein is initially found in the cytoplasm but is tran…		Nuclear receptor coactivator that directly binds nuclear receptors and stimulates the transcriptional activities in a hormone-dependent fashion. Plays a central role in creating a multisubunit coactivator complex, which probably acts via remodeling of chromatin. Involved in the coactivation of different nuclear receptors, such as for steroids (GR and ER), retinoids (RARs and RXRs), thyroid hormon…	Prognostic marker in liver cancer (unfavorable) Cancer specificityi Low cancer specificity Cell line expression clusteri Lymphoma - Humoral immune response (mainly) Cell line specificityi Low cancer specificity	Cytogenetic location: 20q13.12 Genomic coordinates (GRCh38): 20:47,501,887-47,656,872
NFKB2	NA	NA	1.00779		1.094	NA	NA	NA	NA		-1.1412	NA	-1.72326	NA	NA	NA	1.74098	NA		Nuclear factor NF-kappa-B p100 subunit	This gene encodes a subunit of the transcription factor complex nuclear factor-kappa-B (NFkB). The NFkB complex is expressed in numerous cell types and functions as a central activator of genes involved in inflammation and immune function. The protein encoded by this gene can function as both a transcriptional activator or repressor depending on its dimerization partner. The p100 full-length prot…		NF-kappa-B is a pleiotropic transcription factor present in almost all cell types and is the endpoint of a series of signal transduction events that are initiated by a vast array of stimuli related to many biological processes such as inflammation, immunity, differentiation, cell growth, tumorigenesis and apoptosis. NF-kappa-B is a homo- or heterodimeric complex formed by the Rel-like domain-cont…	Prognostic summary Prognostic marker in renal cancer (unfavorable), melanoma (favorable) and colorectal cancer (unfavorable) Cancer specificityi Low cancer specificity Cell line expression clusteri Lymphoid cancers - Immune response (mainly) Cell line specificityi Low cancer specificity	Cytogenetic location: 10q24.32 Genomic coordinates (GRCh38): 10:102,394,110-102,402,529
PCDH10	NA	NA	-1.44373		-1.53831	NA	NA	NA	NA		NA	-1.1023	2.0241	NA	NA	-1.08619	NA	NA		Protocadherin-10	This gene belongs to the protocadherin gene family, a subfamily of the cadherin superfamily. This family member contains 6 extracellular cadherin domains, a transmembrane domain and a cytoplasmic tail differing from those of the classical cadherins. The encoded protein is a cadherin-related neuronal receptor thought to function in the establishment of specific cell-cell connections in the brain. …		Potential calcium-dependent cell-adhesion protein.	Prognostic summary Gene product is not prognostic Cancer specificityi Cancer enhanced (glioma) Cell line expression clusteri Rabdoid cancer - Embryonic development (mainly) Cell line specificityi Cancer enriched (Rhabdoid)	Cytogenetic location: 4q28.3 Genomic coordinates (GRCh38): 4:133,149,294-133,208,606
PCMTD1	NA	NA	-1.05772		-1.14838	NA	NA	NA	NA		NA	NA	1.02207	NA	NA	NA	NA	NA		Protein-L-isoaspartate O-methyltransferase domain-containing protein 1	Predicted to enable protein-L-isoaspartate (D-aspartate) O-methyltransferase activity. Predicted to be involved in protein methylation. Predicted to be located in membrane. Predicted to be active in cytoplasm.		NaN	Prognostic summary Gene product is not prognostic Cancer specificityi Low cancer specificity Cell line expression clusteri Non-specific - Basic cellular processes (mainly) Cell line specificityi Low cancer specificity	Cytogenetic location: 4q28.3 Genomic coordinates (GRCh38): 4:133,149,294-133,208,606
PKIB	NA	NA	-1.85		-1.81311	NA	NA	NA	NA		NA	NA	3.24244	NA	NA	NA	NA	NA		Protein Kinase (CAMP-Dependent, Catalytic) Inhibitor Beta	This gene encodes a member of the cAMP-dependent protein kinase inhibitor family. The encoded protein may play a role in the protein kinase A (PKA) pathway by interacting with the catalytic subunit of PKA, and overexpression of this gene may play a role in prostate cancer. Alternatively spliced transcript variants encoding multiple isoforms have been observed for this gene.		Extremely potent competitive inhibitor of cAMP-dependent protein kinase activity, this protein interacts with the catalytic subunit of the enzyme after the cAMP-induced dissociation of its regulatory chains.	Prognostic summary Prognostic marker in renal cancer (favorable) and liver cancer (unfavorable) Cancer specificityi Cancer enhanced (breast cancer) Cell line expression clusteri Non-specific - Cilium assembly (mainly) Cell line specificityi Low cancer specificity	Cytogenetic location: 6q22.31 Genomic coordinates (GRCh38): 6:122,471,921-122,726,373
PLBD1	NA	NA	-1.16457		-1.09249	NA	NA	NA	NA		NA	NA	1.36787	NA	NA	-1.08397	NA	NA		Phospholipase B Domain Containing 1	Predicted to enable phospholipase activity. Predicted to be involved in phospholipid catabolic process. Located in extracellular space.		In view of the small size of the putative binding pocket, it has been proposed that it may act as an amidase or a peptidase (By similarity). Exhibits a weak phospholipase activity, acting on various phospholipids, including phosphatidylcholine, phosphatidylinositol, phosphatidylethanolamine and lysophospholipids	Prognostic marker in liver cancer (unfavorable) and pancreatic cancer (unfavorable) Cancer enhanced (testis cancer) Cell line expression clusteri Stomach & Colon cancer - Absorption (mainly) Cell line specificityi Low cancer specificity	Cytogenetic location: 12p13.1 Genomic coordinates (GRCh38): 12:14,503,661-14,567,883
PLEKHF2	NA	NA	-1.23442		-1.74229	NA	NA	NA	NA		1.13551	NA	1.14682	NA	NA	NA	NA	NA		Pleckstrin Homology And FYVE Domain Containing 2	Predicted to enable phosphatidylinositol binding activity. Predicted to be involved in protein transport. Located in transport vesicle.		May play a role in early endosome fusion upstream of RAB5, hence regulating receptor trafficking and fluid-phase transport. Enhances cellular sensitivity to TNF-induced apoptosis	Prognostic summary Prognostic marker in renal cancer (favorable) Cancer specificityi Low cancer specificity Cell line expression clusteri Lymphoma - Humoral immune response (mainly) Cell line specificityi Low cancer specificity	Cytogenetic location: 8q22.1 Genomic coordinates (GRCh38): 8:95,133,785-95,156,685
PVR	NA	NA	1.05724		1.09144	NA	NA	NA	NA		NA	NA	-1.31064	NA	NA	NA	1.31845	NA		Poliovirus receptor	The protein encoded by this gene is a transmembrane glycoprotein belonging to the immunoglobulin superfamily. The external domain mediates cell attachment to the extracellular matrix molecule vitronectin, while its intracellular domain interacts with the dynein light chain Tctex-1/DYNLT1. The gene is specific to the primate lineage, and serves as a cellular receptor for poliovirus in the first st…		Mediates NK cell adhesion and triggers NK cell effector functions. Binds two different NK cell receptors: CD96 and CD226. These interactions accumulates at the cell-cell contact site, leading to the formation of a mature immunological synapse between NK cell and target cell. This may trigger adhesion and secretion of lytic granules and IFN-gamma and activate cytotoxicity of activated NK cells. Ma…	Prognostic summary Prognostic marker in cervical cancer (unfavorable), urothelial cancer (unfavorable) and lung cancer (unfavorable) Cancer specificityi Low cancer specificity Cell line expression clusteri Kidney - Mixed function (mainly) Cell line specificityi Low cancer specificity	Cytogenetic location: 19q13.31 Genomic coordinates (GRCh38): 19:44,643,910-44,666,162 RAB15, a member of the RAB family of small GTP-binding proteins, is an endocytic RAB that is also implicated in exocytosis
RAB15	NA	NA	-1.58798		-1.09582	NA	NA	NA	NA		NA	NA	2.18031	NA	NA	NA	NA	NA		Ras-Related Protein Rab-15	Predicted to enable GTP binding activity and GTPase activity. Involved in positive regulation of regulated secretory pathway. Located in cilium; endosome membrane; and perinuclear region of cytoplasm.		May act in concert with RAB3A in regulating aspects of synaptic vesicle membrane flow within the nerve terminal.	Prognostic summary Prognostic marker in liver cancer (unfavorable) Cancer specificityi Cancer enhanced (testis cancer) Cell line expression clusteri Ovarian & Endometrial cancers - Unknown function (mainly) Cell line specificityi Low cancer specificity	Cytogenetic location: 14q23.3 Genomic coordinates (GRCh38): 14:64,945,816-64,972,336
RARA	NA	NA	1.33431		1.29687	NA	NA	NA	NA		NA	NA	-1.09876	NA	NA	NA	NA	NA		Retinoic Acid Receptor Alpha	This gene represents a nuclear retinoic acid receptor. The encoded protein, retinoic acid receptor alpha, regulates transcription in a ligand-dependent manner. This gene has been implicated in regulation of development, differentiation, apoptosis, granulopoeisis, and transcription of clock genes. Translocations between this locus and several other loci have been associated with acute promyelocyti…		Receptor for retinoic acid (PubMed:19850744, PubMed:16417524, PubMed:20215566). Retinoic acid receptors bind as heterodimers to their target response elements in response to their ligands, all-trans or 9-cis retinoic acid, and regulate gene expression in various biological processes (PubMed:28167758). The RXR/RAR heterodimers bind to the retinoic acid response elements (RARE) composed of tandem 5…	Prognostic marker in endometrial cancer (favorable) Cancer specificityi Low cancer specificity Cell line expression clusteri Breast cancer - Unknown function (mainly) Cell line specificityi Low cancer specificity	Cytogenetic location: 17q21.2 Genomic coordinates (GRCh38): 17:40,309,180-40,357,643
RELB	NA	NA	1.02035		1.30104	NA	NA	NA	NA		-1.52548	NA	-1.55312	NA	NA	1.00962	1.85507	NA			Enables RNA polymerase II cis-regulatory region sequence-specific DNA binding activity and protein kinase binding activity. Involved in lymphocyte differentiation and negative regulation of interferon-beta production. Located in cytosol and nucleoplasm. Part of chromatin; nucleus; and transcription repressor complex. Colocalizes with centrosome. Implicated in breast cancer and immunodeficiency 53…		NF-kappa-B is a pleiotropic transcription factor which is present in almost all cell types and is involved in many biological processed such as inflammation, immunity, differentiation, cell growth, tumorigenesis and apoptosis. NF-kappa-B is a homo- or heterodimeric complex formed by the Rel-like domain-containing proteins RELA/p65, RELB, NFKB1/p105, NFKB1/p50, REL and NFKB2/p52. The dimers bind a…	Prognostic summary Prognostic marker in renal cancer (unfavorable) and breast cancer (favorable) Cancer specificityi Low cancer specificity Cell line expression clusteri B-cell cancers - Adaptive immune response (mainly) Cell line specificityi Low cancer specificity	Cytogenetic location: 17q21.2 Genomic coordinates (GRCh38): 17:40,309,180-40,357,643
RGS2	NA	NA	-1.70805		-1.53262	NA	NA	NA	NA		1.4044	NA	1.67083	NA	NA	NA	NA	NA		Regulator Of G Protein Signaling 2	Regulator of G protein signaling (RGS) family members are regulatory molecules that act as GTPase activating proteins (GAPs) for G alpha subunits of heterotrimeric G proteins. RGS proteins are able to deactivate G protein subunits of the Gi alpha, Go alpha and Gq alpha subtypes. They drive G proteins into their inactive GDP-bound forms. Regulator of G protein signaling 2 belongs to this family. T…		Regulates G protein-coupled receptor signaling cascades. Inhibits signal transduction by increasing the GTPase activity of G protein alpha subunits, thereby driving them into their inactive GDP-bound form (PubMed:11063746, PubMed:19478087). It is involved in the negative regulation of the angiotensin-activated signaling pathway (PubMed:28784619). Plays a role in the regulation of blood pressure i…	Prognostic summary Prognostic marker in renal cancer (unfavorable), breast cancer (favorable) and stomach cancer (unfavorable) Cancer specificityi Low cancer specificity Cell line expression clusteri Rabdoid cancer - Embryonic development (mainly) Cell line specificityi Cancer enhanced (Prostate cancer)	Cytogenetic location: 1q31.2 Genomic coordinates (GRCh38): 1:192,809,039-192,812,275
RIMS1	NA	NA	-5.41131		-3.28903	NA	NA	NA	NA		NA	NA	6.26826	NA	NA	NA	NA	NA			Regulating Synaptic Membrane Exocytosis 1		The protein encoded by this gene is a RAS gene superfamily member that regulates synaptic vesicle exocytosis. This gene also plays a role in the regulation of voltage-gated calcium channels during neurotransmitter and insulin release. Mutations have suggested a role cognition and have been identified as the cause of cone-rod dystrophy type 7. Multiple transcript variants encoding different isofor…	Rab (RAS-like protein) effector involved in exocytosis (By similarity).
RNF139-AS1	NA	NA	-1.24235		-1.05744	NA	NA	NA	NA		NA	NA	1.09564	NA	NA	NA	NA	NA
ROR1	NA	NA	1.31463		1.61405	NA	NA	NA	NA		-1.82594	NA	-1.60372	NA	NA	NA	NA	NA		Receptor Tyrosine Kinase Like Orphan Receptor 1	This gene encodes a receptor tyrosine kinase-like orphan receptor that modulates neurite growth in the central nervous system. The encoded protein is a glycosylated type I membrane protein that belongs to the ROR subfamily of cell surface receptors. It is a pseudokinase that lacks catalytic activity and may interact with the non-canonical Wnt signalling pathway. This gene is highly expressed duri…		Has very low kinase activity in vitro and is unlikely to function as a tyrosine kinase in vivo (PubMed:25029443). Receptor for ligand WNT5A which activate downstream NFkB signaling pathway and may result in the inhibition of WNT3A-mediated signaling (PubMed:25029443, PubMed:27162350). In inner ear, crucial for spiral ganglion neurons to innervate auditory hair cells	Prognostic summary Gene product is not prognostic Cancer specificityi Low cancer specificity Cell line expression clusteri Connective tissue cells - ECM organization (mainly) Cell line specificityi Low cancer specificity	Cytogenetic location: 1p31.3 Genomic coordinates (GRCh38): 1:63,774,017-64,181,498		wnt
SDAD1P1	NA	NA	-1.63275		-1.56879	NA	NA	NA	NA		NA	NA	1.67963	NA	NA	NA	NA	NA			NaN		NaN	NaN	NaN
SHISA4	NA	NA	-1.66345		-1.33482	NA	NA	NA	NA		NA	NA	1.94286	NA	NA	NA	NA	NA		Shisa Family Member 4	Predicted to be integral component of membrane.		NaN	Prognostic summary Gene product is not prognostic Cancer specificityi Cancer enhanced (glioma) Cell line expression clusteri Skin cancer - Membrane components (mainly) Cell line specificityi Low cancer specificity	Cytogenetic location: 1q32.1 Genomic coordinates (GRCh38): 1:201,888,677-201,892,587
SLC2A1-AS1	NA	NA	-1.82295		-1.37513	NA	NA	NA	NA		NA	NA	1.99073	NA	NA	NA	NA	NA
SMTN	NA	NA	1.06005		1.44625	NA	NA	NA	NA		NA	NA	-1.44904	NA	NA	NA	NA	NA		Smoothelin	NaN		NaN	NaN	NaN
SSBP3	NA	NA	-1.13362		-1.01829	NA	NA	NA	NA		NA	NA	1.38115	NA	NA	NA	NA	NA		Single Stranded DNA Binding Protein 3	This gene encodes a structural protein that is found exclusively in contractile smooth muscle cells. It associates with stress fibers and constitutes part of the cytoskeleton. This gene is localized to chromosome 22q12.3, distal to the TUPLE1 locus and outside the DiGeorge syndrome deletion. Alternative splicing of this gene results in multiple transcript variants encoding distinct isoforms.		Structural protein of the cytoskeleton.	Prognostic summary Prognostic marker in renal cancer (unfavorable) Cancer specificityi Low cancer specificity Cell line expression clusteri HUVEC & TIME - Signal transduction (mainly) Cell line specificityi Low cancer specificity	Cytogenetic location: 22q12.2 Genomic coordinates (GRCh38): 22:31,064,118-31,104,624
SURF2	NA	NA	1.11037		1.03159	NA	NA	NA	NA		NA	NA	-1.14054	NA	NA	NA	NA	NA		Surfeit locus protein 2	Predicted to enable single-stranded DNA binding activity and transcription coactivator activity. Predicted to be involved in head development and positive regulation of transcription by RNA polymerase II. Predicted to act upstream of or within hematopoietic progenitor cell differentiation. Predicted to be part of protein-containing complex. Predicted to be active in nucleus.		May be involved in transcription regulation of the alpha 2(I) collagen gene where it binds to the single-stranded polypyrimidine sequences in the promoter region.	Prognostic summary Prognostic marker in cervical cancer (favorable) and endometrial cancer (unfavorable) Cancer specificityi Low cancer specificity Cell line expression clusteri Myeloid cells - Innate immune response (mainly) Cell line specificityi Low cancer specificity	Cytogenetic location: 1p32.3 Genomic coordinates (GRCh38): 1:54,225,432-54,413,490
UNC5B	NA	NA	-2.35027		-2.25926	NA	NA	NA	NA		1.30789	NA	2.89873	NA	NA	NA	-2.2417	NA		Unc-5 Netrin Receptor B	This gene shares a bidirectional promoter with surfeit 1 (SURF1; GeneID: 6834), which is located on the opposite strand. It encodes a conserved protein that is expressed in a variety of tissues.		NaN	Prognostic summary Gene product is not prognostic Cancer specificityi Low cancer specificity Cell line expression clusteri Non-specific - Unknown function (mainly) Cell line specificityi Low cancer specificity	Cytogenetic location: 9q34.2 Genomic coordinates (GRCh38): 9:133,356,550-133,361,158
UPP1	NA	NA	1.75656		1.99503	NA	NA	NA	NA		NA	NA	-2.27448	NA	NA	1.79361	2.47701	NA		Uridine Phosphorylase 1	This gene encodes a member of the netrin family of receptors. This particular protein mediates the repulsive effect of netrin-1 and is a vascular netrin receptor. This encoded protein is also in a group of proteins called dependence receptors (DpRs) which are involved in pro- and anti-apoptotic processes. Many DpRs are involved in embryogenesis and in cancer progression. Two alternatively spliced…		Receptor for netrin required for axon guidance. Mediates axon repulsion of neuronal growth cones in the developing nervous system upon ligand binding. Axon repulsion in growth cones may be caused by its association with DCC that may trigger signaling for repulsion (By similarity).	Prognostic summary Prognostic marker in liver cancer (unfavorable), ovarian cancer (unfavorable) and renal cancer (unfavorable) Cancer specificityi Low cancer specificity Cell line expression clusteri Neuroblastoma - Neuronal signaling (mainly) Cell line specificityi Cancer enhanced (Neuroblastoma)	Cytogenetic location: 10q22.1 Genomic coordinates (GRCh38): 10:71,212,570-71,302,864
VSNL1	NA	NA	-1.21104		-1.36193	NA	NA	NA	NA		NA	-1.99974	1.91905	NA	NA	-1.74249	NA	NA		Visinin Like 1	Catalyzes the reversible phosphorylytic cleavage of uridine and deoxyuridine to uracil and ribose- or deoxyribose-1-phosphate (PubMed:7488099). The produced molecules are then utilized as carbon and energy sources or in the rescue of pyrimidine bases for nucleotide synthesis		NaN	Prognostic summary Prognostic marker in cervical cancer (unfavorable) and lung cancer (unfavorable) Cancer specificityi Cancer enhanced (testis cancer) Cell line expression clusteri Keratinocytes - Epithelial cell function (mainly) Cell line specificityi Cancer enhanced (Gallbladder cancer)	Cytogenetic location: 10q22.1 Genomic coordinates (GRCh38): 10:71,212,570-71,302,864
WDR62	NA	NA	1.17152		1.48872	NA	NA	NA	NA		NA	NA	-1.2526	NA	NA	NA	NA	NA		WD Repeat Domain 62	This gene is a member of the visinin/recoverin subfamily of neuronal calcium sensor proteins. The encoded protein is strongly expressed in granule cells of the cerebellum where it associates with membranes in a calcium-dependent manner and modulates intracellular signaling pathways of the central nervous system by directly or indirectly regulating the activity of adenylyl cyclase. Alternatively s…		Regulates (in vitro) the inhibition of rhodopsin phosphorylation in a calcium-dependent manner	Prognostic summary Prognostic marker in glioma (unfavorable) Cancer specificityi Low cancer specificity Cell line expression clusteri DU4475 - Unknown function (mainly) Cell line specificityi Cancer enhanced (Gallbladder cancer)	Cytogenetic location: 2p24.2 Genomic coordinates (GRCh38): 2:17,539,972-17,657,018
WDR63	NA	NA	-1.2841		-1.29523	NA	NA	NA	NA		NA	NA	1.97092	NA	NA	NA	NA	NA		Dynein Axonemal Intermediate Chain 3	This gene is proposed to play a role in cerebral cortical development. Mutations in this gene have been associated with microencephaly, cortical malformations, and cognitive disability. Alternative splicing results in multiple transcript variants		Required for cerebral cortical development. Plays a role in neuronal proliferation and migration (PubMed:20890278, PubMed:20729831). Plays a role in mother-centriole-dependent centriole duplication; the function seems also to involve CEP152, CDK5RAP2 and CEP63 through a stepwise assembled complex at the centrosome that recruits CDK2 required for centriole duplication (PubMed:26297806).	Prognostic summary Gene product is not prognostic Cancer specificityi Cancer enhanced (testis cancer) Cell line expression clusteri Ovarian & Endometrial cancers - Unknown function (mainly) Cell line specificityi Low cancer specificity	Cytogenetic location: 19q13.12 Genomic coordinates (GRCh38): 19:36,054,897-36,111,145
CASP1P2	NA	NA	-2.96789		-3.05753	NA	NA	NA	NA		NA	NA	NA	NA	NA	-4.59398	NA	NA		Caspase 1 Pseudogene 2	Enables Arp2/3 complex binding activity. Involved in negative regulation of Arp2/3 complex-mediated actin nucleation and negative regulation of cell migration. Located in cytoplasm. Acts as a negative regulator of cell migration, invasion, and metastasis downstream of p53/TP53, through inhibition of Arp2/3 complex-mediated actin polymerization (PubMed:32128961). Via its association with the multi…		Acts as a negative regulator of cell migration, invasion, and metastasis downstream of p53/TP53, through inhibition of Arp2/3 complex-mediated actin polymerization (PubMed:32128961). Via its association with the multisubunit axonemal dynein complex, is potentially involved in the regulation of cilia function (By similarity). May play a role in osteogenesis of dental tissue-derived mesenchymal ste…	Prognostic summary Gene product is not prognostic Cancer specificityi Group enriched (endometrial cancer, melanoma) Cell line expression clusteri L-1236 & L-428 - Unknown function (mainly) Cell line specificityi Cancer enhanced (Skin cancer)	WDR63 is a positive enhancer for osteogenic differentiation of stem cells from apical papilla (SCAPs)
CFH	NA	NA	-1.50533		-1.4982	NA	NA	NA	NA		1.35757	NA	NA	NA	NA	-1.42944	NA	NA		Complement Factor H	This gene is a member of the Regulator of Complement Activation (RCA) gene cluster and encodes a protein with twenty short consensus repeat (SCR) domains. This protein is secreted into the bloodstream and has an essential role in the regulation of complement activation, restricting this innate defense mechanism to microbial infections. Mutations in this gene have been associated with hemolytic-ur…		Glycoprotein that plays an essential role in maintaining a well-balanced immune response by modulating complement activation. Acts as a soluble inhibitor of complement, where its binding to self markers such as glycan structures prevents complement activation and amplification on cell surfaces (PubMed:21285368, PubMed:25402769). Accelerates the decay of the complement alternative pathway (AP) C3 …	Prognostic summary Prognostic marker in renal cancer (unfavorable) Cancer specificityi Cancer enriched (liver cancer) Cell line expression clusteri Keratinocytes - Epithelial cell function (mainly) Cell line specificityi Cancer enhanced (Gallbladder cancer)	Cytogenetic location: 1q31.3 Genomic coordinates (GRCh38): 1:196,652,043-196,747,504
DNAH3	NA	NA	-1.84954		-1.99557	NA	NA	NA	NA		NA	NA	NA	NA	NA	-1.89787	NA	NA		Dynein Axonemal Heavy Chain 3	This gene belongs to the dynein family, whose members encode large proteins that are constituents of the microtubule-associated motor protein complex. This complex is composed of dynein heavy, intermediate and light chains, which can be axonemal or cytoplasmic. This protein is an axonemal dynein heavy chain. It is involved in producing force for ciliary beating by using energy from ATP hydrolysis…		Force generating protein of respiratory cilia. Produces force towards the minus ends of microtubules. Dynein has ATPase activity; the force-producing power stroke is thought to occur on release of ADP. Involved in sperm motility; implicated in sperm flagellar assembly (By similarity)	Prognostic summary Gene product is not prognostic Cancer specificityi Low cancer specificity Cell line expression clusteri TT & NCI-H1385 - Synaptic signal transduction (mainly) Cell line specificityi Not detected	Cytogenetic location: 16p12.3 Genomic coordinates (GRCh38): 16:20,933,111-21,159,459
EGLN3	NA	NA	-1.13696		-1.10559	NA	NA	NA	NA		NA	NA	NA	NA	NA	-1.43042	NA	NA		Egl-9 Family Hypoxia Inducible Factor 3	Enables peptidyl-proline 4-dioxygenase activity. Involved in several processes, including activation of cysteine-type endopeptidase activity involved in apoptotic process; peptidyl-proline hydroxylation to 4-hydroxy-L-proline; and response to hypoxia. Located in cytosol and nucleus. Implicated in renal cell carcinoma. Biomarker of clear cell renal cell carcinoma.		Prolyl hydroxylase that mediates hydroxylation of proline residues in target proteins, such as PKM, TELO2, ATF4 and HIF1A Regulator of cardiomyocyte and neuronal apoptosis. In cardiomyocytes, inhibits the anti-apoptotic effect of BCL2 by disrupting the BAX-BCL2 complex (PubMed:20849813). In neurons, has a NGF-induced proapoptotic effect, probably through regulating CASP3 activity (PubMed:16098468…	Prognostic summary Prognostic marker in liver cancer (unfavorable) and renal cancer (unfavorable) Cancer specificityi Cancer enhanced (renal cancer) Cell line expression clusteri Kidney - Mixed function (mainly) Cell line specificityi Cancer enhanced (Kidney cancer)	Cytogenetic location: 14q13.1 Genomic coordinates (GRCh38): 14:33,924,227-33,951,074
GPX7	NA	NA	-1.35828		-1.17045	NA	NA	NA	NA		NA	NA	NA	NA	NA	-1.29307	NA	NA		Glutathione Peroxidase 7	Enables catalase activity. Predicted to be involved in cellular response to oxidative stress. Located in endoplasmic reticulum. It protects esophageal epithelia from hydrogen peroxide-induced oxidative stress. It suppresses acidic bile acid-induced reactive oxigen species (ROS) and protects against oxidative DNA damage and double-strand breaks.		It protects esophageal epithelia from hydrogen peroxide-induced oxidative stress. It suppresses acidic bile acid-induced reactive oxigen species (ROS) and protects against oxidative DNA damage and double-strand breaks.	Prognostic summary Prognostic marker in renal cancer (unfavorable) Cancer specificityi Low cancer specificity Cell line expression clusteri B-cell cancers - Adaptive immune response (mainly) Cell line specificityi Low cancer specificity	Cytogenetic location: 1p32.3 Genomic coordinates (GRCh38): 1:52,602,371-52,609,051
ZFP69B	NA	NA	1.33631		1.42954	NA	NA	NA	NA		NA	1.26814	NA	NA	NA	1.21157	NA	NA		ZFP69 Zinc Finger Protein B	Predicted to enable DNA-binding transcription repressor activity, RNA polymerase II-specific and RNA polymerase II transcription regulatory region sequence-specific DNA binding activity. Involved in Golgi organization. Located in nucleolus. May be involved in transcriptional regulation. Essential for Golgi structural integrity		May be involved in transcriptional regulation. Essential for Golgi structural integrity	Prognostic summary Gene product is not prognostic Cancer specificityi Low cancer specificity Cell line expression clusteri Non-specific - Cilium assembly (mainly) Cell line specificityi Low cancer specificity	NaN
ACTG1P1	NA	NA	-2.49157		-2.57456	NA	NA	NA	NA		NA	NA	NA	NA	NA	NA	NA	NA		Actin Gamma 1 Pseudogene 1			NaN	NaN	NaN
ACY3	NA	NA	-2.63729		-2.10061	NA	NA	NA	NA		NA	NA	NA	NA	NA	NA	NA	NA		Aminoacylase 3	Predicted to enable aminoacylase activity. Located in extracellular exosome. [provided by Alliance of Genome Resources, Apr 2022]
ARL6IP5	NA	NA	-1.18798		-1.22931	NA	NA	NA	NA		NA	NA	NA	NA	NA	NA	NA	NA		ADP Ribosylation Factor Like GTPase 6 Interacting Protein 5	Expression of this gene is affected by vitamin A. The encoded protein of this gene may be associated with the cytoskeleton. A similar protein in rats may play a role in the regulation of cell differentiation. The rat protein binds and inhibits the cell membrane glutamate transporter EAAC1. The expression of the rat gene is upregulated by retinoic acid, which results in a specific reduction in EAA…		Regulates intracellular concentrations of taurine and glutamate. Negatively modulates SLC1A1/EAAC1 glutamate transport activity by decreasing its affinity for glutamate in a PKC activity-dependent manner. Plays a role in the retention of SLC1A1/EAAC1 in the endoplasmic reticulum.	Prognostic summary Gene product is not prognostic Cancer specificityi Low cancer specificity Cell line expression clusteri Non-specific - Unknown function (mainly) Cell line specificityi Low cancer specificity	Cytogenetic location: 3p14.1 Genomic coordinates (GRCh38): 3:69,084,937-69,106,092
BHMT	NA	NA	-2.41146		-2.10434	NA	NA	NA	NA		NA	NA	NA	NA	NA	NA	NA	NA		Betaine--Homocysteine S-Methyltransferase	This gene encodes a cytosolic enzyme that catalyzes the conversion of betaine and homocysteine to dimethylglycine and methionine, respectively. Defects in this gene could lead to hyperhomocyst(e)inemia, but such a defect has not yet been observed. [provided by RefSeq, Jul 2008]
C1orf228	NA	NA	-2.88368		-2.35436	NA	NA	NA	NA		NA	NA	NA	NA	NA	NA	NA	NA		Armadillo Like Helical Domain Containing 1			Involved in the regulation of homocysteine metabolism. Converts betaine and homocysteine to dimethylglycine and methionine, respectively. This reaction is also required for the irreversible oxidation of choline	Prognostic summary Prognostic marker in endometrial cancer (favorable) Cancer specificityi Low cancer specificity Cell line expression clusteri Myeloid cells - Innate immune response (mainly) Cell line specificityi Cancer enhanced (Leukemia)	NaN
CBS	NA	NA	1.71615		2.54686	NA	NA	NA	NA		NA	NA	NA	NA	NA	NA	NA	NA		Cystathionine Beta-Synthase	The protein encoded by this gene acts as a homotetramer to catalyze the conversion of homocysteine to cystathionine, the first step in the transsulfuration pathway. The encoded protein is allosterically activated by adenosyl-methionine and uses pyridoxal phosphate as a cofactor. Defects in this gene can cause cystathionine beta-synthase deficiency (CBSD), which can lead to homocystinuria. This ge…		NaN
CCDC102B	NA	NA	-2.04614		-1.93841	NA	NA	NA	NA		NA	NA	NA	NA	NA	NA	NA	NA		Coiled-Coil Domain Containing 102B	CCDC102B (Coiled-Coil Domain Containing 102B) is a Protein Coding gene. Diseases associated with CCDC102B include Scleral Staphyloma and Degenerative Myopia. An important paralog of this gene is MYH13.	During interphase, forms fibers at the proximal ends of centrioles to maintain centrosome cohesion (PubMed:30404835).
COLCA2	NA	NA	-3.95671		-3.99681	NA	NA	NA	NA		NA	NA	NA	NA	NA	NA	NA	NA		POU Class 2 Homeobox Associating Factor 3	POU2AF3 (POU Class 2 Homeobox Associating Factor 3) is a Protein Coding gene. Diseases associated with POU2AF3 include Colorectal Cancer.	ranscriptional coactivator that specifically associates with POU2F3 (PubMed:35576971).	This complex drives the development of tuft cells, a rare a rare chemosensory cells that coordinate immune and neural functions within mucosal epithelial tissues (PubMed:35576971)	Prognostic marker in renal cancer (favorable)
CPQ	NA	NA	-1.27987		-1.89024	NA	NA	NA	NA		NA	NA	NA	NA	NA	NA	NA	NA		Carboxypeptidase Q	This gene encodes a metallopeptidase that belongs to the peptidase M28 family. The encoded protein may catalyze the cleavage of dipeptides with unsubstituted terminals into amino acids. [provided by RefSeq, Jul 2013]
CRELD1	NA	NA	-1.01511		-1.04571	NA	NA	NA	NA		NA	NA	NA	NA	NA	NA	NA	NA		Cysteine Rich With EGF Like Domains 1	This gene encodes a member of a subfamily of epidermal growth factor-related proteins. The encoded protein is characterized by a cysteine-rich with epidermal growth factor-like domain. This protein may function as a cell adhesion molecule. Mutations in this gene are the cause of atrioventricular septal defect. Alternate splicing results in multiple transcript variants		Transcriptional coactivator that specifically associates with POU2F3 (PubMed:35576971). This complex drives the development of tuft cells, a rare a rare chemosensory cells that coordinate immune and neural functions within mucosal epithelial tissues (PubMed:35576971). ( OCAT2_HUMAN,A8K830 )	Protein disulfide isomerase (By similarity). Promotes the localization of acetylcholine receptors (AChRs) to the plasma membrane (By similarity).	Prognostic summary Prognostic marker in glioma (unfavorable) Cancer specificityi Low cancer specificity Cell line expression clusteri Non-specific - Unknown function (mainly) Cell line specificityi Low cancer specificity
CYGB	NA	NA	-3.84549		-3.48077	NA	NA	NA	NA		NA	NA	NA	NA	NA	NA	NA	NA			Cytoglobin	This gene encodes a globin protein found in vertebrate cells. The encoded protein is described as a hexacoordinate hemoglobin which binds ligand differently from the pentacoordinate hemoglobins involved in oxygen transport, and may be involved in protection during oxidative stress. This gene is located on chromosome 17 in the same region as a retinal gene which is mutated in progressive rod-cone …	May have a protective function during conditions of oxidative stress. May be involved in intracellular oxygen storage or transfer.		Cytoglobin is a ubiquitously expressed hexacoordinate hemoglobin that may facilitate diffusion of oxygen through tissues, scavenge nitric oxide or other reactive oxygen species, or serve a protective function during oxidative stress (Trent and Hargrove, 2002)
CYR61	NA	NA	1.24316		1.40561	NA	NA	NA	NA		NA	NA	NA	NA	NA	NA	NA	NA		Cellular Communication Network Factor 1	The secreted protein encoded by this gene is growth factor-inducible and promotes the adhesion of endothelial cells. The encoded protein interacts with several integrins and with heparan sulfate proteoglycan. This protein also plays a role in cell proliferation, differentiation, angiogenesis, apoptosis, and extracellular matrix formation			Promotes cell proliferation, chemotaxis, angiogenesis and cell adhesion. Appears to play a role in wound healing by up-regulating, in skin fibroblasts, the expression of a number of genes involved in angiogenesis, inflammation and matrix remodeling including VEGA-A, VEGA-C, MMP1, MMP3, TIMP1, uPA, PAI-1 and integrins alpha-3 and alpha-5. CCN1-mediated gene regulation is dependent on heparin-bindi…	Prognostic summary Prognostic marker in renal cancer (unfavorable) Cancer specificityi Low cancer specificity Cell line expression clusteri Connective tissue cells - ECM organization (mainly) Cell line specificityi Low cancer specificity
DHRS12	NA	NA	-1.15613		-1.38832	NA	NA	NA	NA		NA	NA	NA	NA	NA	NA	NA	NA		Dehydrogenase/Reductase 12	The secreted protein encoded by this gene is growth factor-inducible and promotes the adhesion of endothelial cells. The encoded protein interacts with several integrins and with heparan sulfate proteoglycan. This protein also plays a role in cell proliferation, differentiation, angiogenesis, apoptosis, and extracellular matrix formation		Promotes cell proliferation, chemotaxis, angiogenesis and cell adhesion. Appears to play a role in wound healing by up-regulating, in skin fibroblasts, the expression of a number of genes involved in angiogenesis, inflammation and matrix remodeling including VEGA-A, VEGA-C, MMP1, MMP3, TIMP1, uPA, PAI-1 and integrins alpha-3 and alpha-5. CCN1-mediated gene regulation is dependent on heparin-bindi…	Prognostic summary Prognostic marker in renal cancer (unfavorable) Cancer specificityi Low cancer specificity Cell line expression clusteri Connective tissue cells - ECM organization (mainly) Cell line specificityi Low cancer specificity	Cytogenetic location: 1p22.3 Genomic coordinates (GRCh38): 1:85,580,761-85,583,950
DLX4	NA	NA	-3.08575		-2.68603	NA	NA	NA	NA		NA	NA	NA	NA	NA	NA	NA	NA			Distal-Less Homeobox 4	Many vertebrate homeo box-containing genes have been identified on the basis of their sequence similarity with Drosophila developmental genes. Members of the Dlx gene family contain a homeobox that is related to that of Distal-less (Dll), a gene expressed in the head and limbs of the developing fruit fly. The Distal-less (Dlx) family of genes comprises at least 6 different members, DLX1-DLX6. The…	May play a role in determining the production of hemoglobin S. May act as a repressor. During embryonic development, plays a role in palatogenesis.	Many vertebrate homeo box-containing genes have been identified on the basis of their sequence similarity with Drosophila developmental genes. Members of the Dlx gene family contain a homeobox that is related to that of Distal-less (Dll), a gene expressed in the head and limbs of the developing fruit fly. The Distal-less (Dlx) family of genes comprises at least 6 different members, DLX1-DLX6. The…	By electrophoretic mobility shift assay, Chase et al. (2002) confirmed that BP1 bound silencer I and silencer II of the beta-globin gene. It also bound Indian haplotype beta-globin sequences with high affinity. Analysis of the effect of transient BP1 transfection on reporter gene activity indicated that BP1 has repressor function toward the beta-globin promoter, acting through the 2 silencer elem…
DOCK8	NA	NA	-3.86343		-2.73963	NA	NA	NA	NA		NA	NA	NA	NA	NA	NA	NA	NA		Dedicator Of Cytokinesis 8	This gene encodes a member of the DOCK180 family of guanine nucleotide exchange factors. Guanine nucleotide exchange factors interact with Rho GTPases and are components of intracellular signaling networks. Mutations in this gene result in the autosomal recessive form of the hyper-IgE syndrome. Alternatively spliced transcript variants encoding different isoforms have been described.		Guanine nucleotide exchange factor (GEF) which specifically activates small GTPase CDC42 by exchanging bound GDP for free GTP (PubMed:28028151, PubMed:22461490). During immune responses, required for interstitial dendritic cell (DC) migration by locally activating CDC42 at the leading edge membrane of DC (By similarity). Required for CD4+ T-cell migration in response to chemokine stimulation by p…	Prognostic summary Prognostic marker in urothelial cancer (favorable) and renal cancer (favorable) Cancer specificityi Low cancer specificity Cell line expression clusteri B-cell cancers - Adaptive immune response (mainly) Cell line specificityi Group enriched (Leukemia, Lymphoma, Myeloma)	Cytogenetic location: 9p24.3 Genomic coordinates (GRCh38): 9:211,257-465,255
ENTPD3-AS1	NA	NA	-1.1619		-1.29328	NA	NA	NA	NA		NA	NA	NA	NA	NA	NA	NA	NA		ENTPD3 Antisense RNA 1
EPAS1	NA	NA	-1.11046		-1.32818	NA	NA	NA	NA		NA	NA	NA	NA	NA	NA	NA	NA		Endothelial PAS Domain Protein 1	This gene encodes a transcription factor involved in the induction of genes regulated by oxygen, which is induced as oxygen levels fall. The encoded protein contains a basic-helix-loop-helix domain protein dimerization domain as well as a domain found in proteins in signal transduction pathways which respond to oxygen levels. Mutations in this gene are associated with erythrocytosis familial type…		Transcription factor involved in the induction of oxygen regulated genes. Heterodimerizes with ARNT; heterodimer binds to core DNA sequence 5'-TACGTG-3' within the hypoxia response element (HRE) of target gene promoters (By similarity). Regulates the vascular endothelial growth factor (VEGF) expression and seems to be implicated in the development of blood vessels and the tubular system of lung. …	Prognostic summary Prognostic marker in renal cancer (favorable) Cancer specificityi Low cancer specificity Cell line expression clusteri Non-specific - Enzymes (mainly) Cell line specificityi Low cancer specificity	Cytogenetic location: 2p21 Genomic coordinates (GRCh38): 2:46,297,407-46,386,697
ESPN	NA	NA	-3.79554		-3.64876	NA	NA	NA	NA		NA	NA	NA	NA	NA	NA	NA	NA		Espin	This gene encodes a multifunctional actin-bundling protein. It plays a major role in regulating the organization, dimensions, dynamics, and signaling capacities of the actin filament-rich, microvillus-type specializations that mediate sensory transduction in various mechanosensory and chemosensory cells. Mutations in this gene are associated with autosomal recessive neurosensory deafness, and aut…		Multifunctional actin-bundling protein. Plays a major role in regulating the organization, dimension, dynamics and signaling capacities of the actin filament-rich microvilli in the mechanosensory and chemosensory cells (PubMed:29572253). Required for the assembly and stabilization of the stereociliary parallel actin bundles. Plays a crucial role in the formation and maintenance of inner ear hair …	Prognostic summary Gene product is not prognostic Cancer specificityi Low cancer specificity Cell line expression clusteri Myeloid leukemia - Oxygen transport (mainly) Cell line specificityi Cancer enhanced (Gallbladder cancer)	Cytogenetic location: 1p36.31 Genomic coordinates (GRCh38): 1:6,424,776-6,461,370
GLUL	NA	NA	-1.28839		-1.19761	NA	NA	NA	NA		NA	NA	NA	NA	NA	NA	NA	NA		Glutamate-Ammonia Ligase	The protein encoded by this gene belongs to the glutamine synthetase family. It catalyzes the synthesis of glutamine from glutamate and ammonia in an ATP-dependent reaction. This protein plays a role in ammonia and glutamate detoxification, acid-base homeostasis, cell signaling, and cell proliferation. Glutamine is an abundant amino acid, and is important to the biosynthesis of several amino acid…		Glutamine synthetase that catalyzes the ATP-dependent conversion of glutamate and ammonia to glutamine (PubMed:30158707, PubMed:16267323). Its role depends on tissue localization: in the brain, it regulates the levels of toxic ammonia and converts neurotoxic glutamate to harmless glutamine, whereas in the liver, it is one of the enzymes responsible for the removal of ammonia (By similarity). Esse…	Prognostic summary Prognostic marker in breast cancer (favorable) Cancer specificityi Cancer enhanced (liver cancer) Cell line expression clusteri Fibroblasts - Metabolism (mainly) Cell line specificityi Low cancer specificity	Cytogenetic location: 1q25.3 Genomic coordinates (GRCh38): 1:182,378,098-182,391,790
GPR155	NA	NA	-1.02206		-1.22613	NA	NA	NA	NA		NA	NA	NA	NA	NA	NA	NA	NA		G Protein-Coupled Receptor 155	Involved in cognition. Located in extracellular exosome. GPR155 (G Protein-Coupled Receptor 155) is a Protein Coding gene. Diseases associated with GPR155 include Noonan Syndrome 13 and Isolated Growth Hormone Deficiency, Type Ib. An important paralog of this gene is PREX1.			Prognostic summary Gene product is not prognostic Cancer specificityi Low cancer specificity Cell line expression clusteri DU4475 - Unknown function (mainly) Cell line specificityi Low cancer specificity
HCAR3	NA	NA	-2.16136		-1.50286	NA	NA	-3.82517	NA		NA	NA	NA	NA	NA	NA	NA	NA		Hydroxycarboxylic Acid Receptor 3	Predicted to enable GTP binding activity and purinergic nucleotide receptor activity. Predicted to be involved in G protein-coupled receptor signaling pathway. Located in cell junction. HCAR3 (Hydroxycarboxylic Acid Receptor 3) is a Protein Coding gene. Diseases associated with HCAR3 include Pellagra and Hypoalphalipoproteinemia, Primary, 1. Among its related pathways are GPCR downstream signalli…		Receptor for 3-OH-octanoid acid mediates a negative feedback regulation of adipocyte lipolysis to counteract prolipolytic influences under conditions of physiological or pathological increases in beta-oxidation rates. Acts as a low affinity receptor for nicotinic acid. This pharmacological effect requires nicotinic acid doses that are much higher than those provided by a normal diet	Prognostic summary Gene product is not prognostic Cancer specificityi Group enriched (cervical cancer, head and neck cancer, lung cancer, urothelial cancer) Cell line expression clusteri Keratinocytes - Epithelial cell function (mainly) Cell line specificityi Group enriched (Bladder cancer, Cervical cancer, Esophageal cancer, Gallbladder cancer, Head and neck cancer)	Cytogenetic location: 12q24.31 Genomic coordinates (GRCh38): 12:122,714,756-122,716,811
HES4	NA	NA	-1.14197		-1.62095	NA	NA	NA	NA		NA	NA	NA	NA	NA	NA	NA	NA		Hes Family BHLH Transcription Factor 4	Predicted to enable DNA-binding transcription factor activity, RNA polymerase II-specific and RNA polymerase II cis-regulatory region sequence-specific DNA binding activity. Predicted to be involved in anterior/posterior pattern specification and regulation of transcription by RNA polymerase II. Predicted to be part of chromatin. Predicted to be active in nucleus.		Transcriptional repressor. Binds DNA on N-box motifs: 5'-CACNAG-3'	Prognostic summary Prognostic marker in liver cancer (unfavorable), endometrial cancer (favorable) and renal cancer (unfavorable) Cancer specificityi Low cancer specificity Cell line expression clusteri Lymphoid cancers - Adaptive immune response (mainly) Cell line specificityi Low cancer specificity	Cytogenetic location: 1p36.33 Genomic coordinates (GRCh38): 1:998,964-1,000,097
HMGA1P2	NA	NA	2.22554		2.12463	NA	NA	NA	NA		NA	NA	NA	NA	NA	NA	NA	NA		High Mobility Group AT-Hook 1 Pseudogene 2	HMGA1P2 (High Mobility Group AT-Hook 1 Pseudogene 2) is a Pseudogene.
KLHDC1	NA	NA	-2.56181		-2.3559	NA	NA	NA	NA		NA	NA	NA	NA	NA	NA	NA	NA		Kelch Domain Containing 1	Enables ubiquitin ligase-substrate adaptor activity. Involved in ubiquitin-dependent protein catabolic process via the C-end degron rule pathway. Is active in Cul5-RING ubiquitin ligase complex and cytosol. Substrate-recognition component of a Cul5-RING (CRL5) E3 ubiquitin-protein ligase complex of the DesCEND (destruction via C-end degrons) pathway, which recognizes a C-degron located at the ext…		Substrate-recognition component of a Cul5-RING (CRL5) E3 ubiquitin-protein ligase complex of the DesCEND (destruction via C-end degrons) pathway, which recognizes a C-degron located at the extreme C terminus of target proteins, leading to their ubiquitination and degradation (PubMed:32200094). The C-degron recognized by the DesCEND pathway is usually a motif of less than ten residues and can be p…	Prognostic summary Prognostic marker in pancreatic cancer (favorable) Cancer specificityi Low cancer specificity Cell line expression clusteri Fibroblasts - Metabolism (mainly) Cell line specificityi Low cancer specificity	Cytogenetic location: 14q21.3 Genomic coordinates (GRCh38): 14:49,693,120-49,753,150
LINC00322	NA	NA	-3.8383		-3.7407	NA	NA	NA	NA		NA	NA	NA	NA	NA	NA	NA	NA		Long Intergenic Non-Protein Coding RNA 322	LINC00322 (Long Intergenic Non-Protein Coding RNA 322) is an RNA Gene, and is affiliated with the lncRNA class.
LINC00847	NA	NA	-1.06452		-1.28587	NA	NA	NA	NA		NA	NA	NA	NA	NA	NA	-1.10566	NA		Long Intergenic Non-Protein Coding RNA 847	LINC00847 (Long Intergenic Non-Protein Coding RNA 847) is an RNA Gene, and is affiliated with the lncRNA class.
LINC00933	NA	NA	-2.54579		-2.36883	NA	NA	NA	NA		NA	NA	NA	NA	NA	NA	NA	NA		Long Intergenic Non-Protein Coding RNA 933	LINC00933 (Long Intergenic Non-Protein Coding RNA 933) is an RNA Gene, and is affiliated with the lncRNA class.
LINC02163	NA	NA	-1.44038		-1.2249	NA	NA	NA	NA		NA	NA	NA	NA	NA	NA	NA	NA		NcRNA Involved In NHEJ Oncogenic Ligation Efficiency	NIHCOLE (NcRNA Involved In NHEJ Oncogenic Ligation Efficiency) is an RNA Gene, and is affiliated with the lncRNA class. Diseases associated with NIHCOLE include Colorectal Cancer and Retinitis Pigmentosa 11.
MIR200CHG	NA	NA	-1.15916		-1.18227	NA	NA	NA	NA		NA	NA	NA	NA	NA	NA	NA	NA		MIR200C And MIR141 Host Gene	MIR200CHG (MIR200C And MIR141 Host Gene) is an RNA Gene, and is affiliated with the lncRNA class. Diseases associated with MIR200CHG include Retinitis Pigmentosa 17.
MIR23B	NA	NA	-3.34247		-3.00373	NA	NA	NA	NA		NA	NA	NA	NA	NA	NA	NA	NA		MicroRNA 23b	microRNAs (miRNAs) are short (20-24 nt) non-coding RNAs that are involved in post-transcriptional regulation of gene expression in multicellular organisms by affecting both the stability and translation of mRNAs. miRNAs are transcribed by RNA polymerase II as part of capped and polyadenylated primary transcripts (pri-miRNAs) that can be either protein-coding or non-coding. The primary transcript …				Cytogenetic location: 9q22.32 Genomic coordinates (GRCh38): 9:95,085,208-95,085,304
MMP24-AS1	NA	NA	1.14698		1.17539	NA	NA	NA	NA		NA	NA	NA	NA	NA	NA	1.68965	NA		MMP24-AS1-EDEM2 Readthrough 3 ER Degradation-Enhancing Alpha-Mannosidase-Like Protein 2	This record represents naturally-occurring readthrough transcription between upstream GeneID:101410538 (MMP24 antisense RNA 1) and the ER degradation enhancing alpha-mannosidase like protein 2 (EDEM2) gene. Readthrough transcripts may encode proteins similar to those encoded by the EDEM2 gene. [provided by RefSeq, Aug 2017]		Prognostic summary Gene product is not prognostic Cancer specificityi Low cancer specificity Cell line expression clusteri Ovarian cancer RMG-I - Cellular stress response (mainly) Cell line specificityi Low cancer specificity
MOSPD3	NA	NA	-1.17724		-1.03109	NA	NA	NA	NA		NA	NA	NA	NA	NA	NA	NA	NA		Motile Sperm Domain Containing 3	This gene encodes a multi-pass membrane protein with a major sperm protein (MSP) domain. The deletion of a similar mouse gene is associated with defective cardiac development and neonatal lethality. Alternate transcriptional splice variants, encoding different isoforms, have been described.			Prognostic summary Gene product is not prognostic Cancer specificityi Low cancer specificity Cell line expression clusteri Non-specific - Transcription (mainly) Cell line specificityi Low cancer specificity	Cytogenetic location: 7q22.1 Genomic coordinates (GRCh38): 7:100,612,162-100,615,377
MR1	NA	NA	-1.00148		-1.11686	NA	NA	NA	NA		NA	NA	NA	NA	NA	NA	NA	NA		Major Histocompatibility Complex, Class I-Related	MAIT (mucosal-associated invariant T-cells) lymphocytes represent a small population of T-cells primarily found in the gut. The protein encoded by this gene is an antigen-presenting molecule that presents metabolites of microbial vitamin B to MAITs. This presentation may activate the MAITs to regulate the amounts of specific types of bacteria in the gut. Several transcript variants encoding diffe…			Prognostic summary Gene product is not prognostic Cancer specificityi Low cancer specificity Cell line expression clusteri Myeloma - Humoral immune response (mainly) Cell line specificityi Low cancer specificity	Cytogenetic location: 1q25.3 Genomic coordinates (GRCh38): 1:181,033,387-181,061,938
NGEF	NA	NA	1.02959		1.36182	NA	NA	NA	NA		NA	NA	NA	NA	NA	NA	NA	NA		Neuronal Guanine Nucleotide Exchange Factor	Enables guanyl-nucleotide exchange factor activity. Predicted to be involved in several processes, including activation of GTPase activity; ephrin receptor signaling pathway; and negative regulation of dendritic spine morphogenesis. Predicted to be located in cytosol. Predicted to be active in glutamatergic synapse.		Acts as a guanine nucleotide exchange factor (GEF) which differentially activates the GTPases RHOA, RAC1 and CDC42. Plays a role in axon guidance regulating ephrin-induced growth cone collapse and dendritic spine morphogenesis. Upon activation by ephrin through EPHA4, the GEF activity switches toward RHOA resulting in its activation. Activated RHOA promotes cone retraction at the expense of RAC1-…	Prognostic summary Gene product is not prognostic Cancer specificityi Cancer enhanced (testis cancer) Cell line expression clusteri Stomach & Colon cancer - Absorption (mainly) Cell line specificityi Low cancer specificity	Cytogenetic location: 2q37.1 Genomic coordinates (GRCh38): 2:232,878,701-233,013,256
NOTCH1	NA	NA	-1.27983		-1.32725	NA	NA	NA	NA		1.15482	NA	NA	NA	NA	NA	NA	NA		Notch Receptor 1	This gene encodes a member of the NOTCH family of proteins. Members of this Type I transmembrane protein family share structural characteristics including an extracellular domain consisting of multiple epidermal growth factor-like (EGF) repeats, and an intracellular domain consisting of multiple different domain types. Notch signaling is an evolutionarily conserved intercellular signaling pathway…		Functions as a receptor for membrane-bound ligands Jagged-1 (JAG1), Jagged-2 (JAG2) and Delta-1 (DLL1) to regulate cell-fate determination. Upon ligand activation through the released notch intracellular domain (NICD) it forms a transcriptional activator complex with RBPJ/RBPSUH and activates genes of the enhancer of split locus. Affects the implementation of differentiation, proliferation and ap…	Prognostic summary Prognostic marker in renal cancer (unfavorable) Cancer specificityi Low cancer specificity Cell line expression clusteri Lymphoid cancers - Adaptive immune response (mainly) Cell line specificityi Low cancer specificity	Cytogenetic location: 9q34.3 Genomic coordinates (GRCh38): 9:136,494,433-136,546,048
NR1D1	NA	NA	1.00991		1.40452	NA	NA	NA	NA		NA	NA	NA	NA	NA	NA	NA	NA		Nuclear Receptor Subfamily 1 Group D Member 1	This gene encodes a transcription factor that is a member of the nuclear receptor subfamily 1. The encoded protein is a ligand-sensitive transcription factor that negatively regulates the expression of core clock proteins. In particular this protein represses the circadian clock transcription factor aryl hydrocarbon receptor nuclear translocator-like protein 1 (ARNTL). This protein may also be in…		Transcriptional repressor which coordinates circadian rhythm and metabolic pathways in a heme-dependent manner. Modulates skeletal muscle oxidative capacity by regulating mitochondrial biogenesis and autophagy. In the ovarian granulosa cells acts as a transcriptional activator of STAR which plays a role in steroid biosynthesis. Plays a key role in the circadian regulation of microglial activation…	Prognostic summary Prognostic marker in melanoma (favorable) and colorectal cancer (unfavorable) Cancer specificityi Low cancer specificity Cell line expression clusteri Keratinocytes - Epithelial cell function (mainly) Cell line specificityi Low cancer specificity	Cytogenetic location: 17q21.1 Genomic coordinates (GRCh38): 17:40,092,793-40,100,589
NUDT14	NA	NA	-1.00325		-1.13155	NA	NA	NA	NA		NA	NA	NA	NA	NA	NA	NA	NA		Nudix Hydrolase 14	The protein encoded by this gene is a member of the Nudix hydrolase family. Nudix hydrolases eliminate potentially toxic nucleotide metabolites from the cell and regulate the concentrations and availability of many different nucleotide substrates, cofactors, and signaling molecules. This enzyme contains a Nudix hydrolase domain and is a UDPG pyrophosphatase that hydrolyzes UDPG to produce glucose…		Hydrolyzes UDP-glucose to glucose 1-phosphate and UMP and ADP-ribose to ribose 5-phosphate and AMP. The physiological substrate is probably UDP-glucose. Poor activity on other substrates such as ADP-glucose, CDP-glucose, GDP-glucose and GDP-mannose.	Prognostic summary Prognostic marker in renal cancer (favorable) and ovarian cancer (favorable) Cancer specificityi Low cancer specificity Cell line expression clusteri Non-specific - Unknown function (mainly) Cell line specificityi Low cancer specificity	Cytogenetic location: 14q32.33 Genomic coordinates (GRCh38): 14:105,172,939-105,181,312
PAXBP1-AS1	NA	NA	-1.60287		-1.18456	NA	NA	NA	NA		NA	NA	NA	NA	NA	NA	NA	NA		PAXBP1 Antisense RNA 1	PAXBP1-AS1 (PAXBP1 Antisense RNA 1) is an RNA Gene, and is affiliated with the lncRNA class.
PCDHGA8	NA	NA	-3.63163		-3.61395	NA	NA	NA	NA		NA	NA	NA	NA	NA	NA	NA	NA		Protocadherin gamma-A8	This gene is a member of the protocadherin gamma gene cluster, one of three related clusters tandemly linked on chromosome five. These gene clusters have an immunoglobulin-like organization, suggesting that a novel mechanism may be involved in their regulation and expression. The gamma gene cluster includes 22 genes divided into 3 subfamilies. Subfamily A contains 12 genes, subfamily B contains 7…		Potential calcium-dependent cell-adhesion protein. May be involved in the establishment and maintenance of specific neuronal connections in the brain.	Prognostic summary Gene product is not prognostic Cancer specificityi Not detected Cell line expression clusteri Non-specific - Transcription (mainly) Cell line specificityi Not detected	Cytogenetic location: 5q31.3 Genomic coordinates (GRCh38): 5:141,392,633-141,512,975
PCDHGB8P	NA	NA	-2.61582		-2.26619	NA	NA	NA	NA		NA	NA	NA	NA	NA	NA	NA	NA			PCDHGB8P (Protocadherin Gamma Subfamily B, 8 Pseudogene) is a Pseudogene.
PGAM1P8	NA	NA	-1.49836		-1.26472	NA	NA	NA	NA		NA	NA	NA	NA	NA	NA	NA	NA			PGAM1P8 (Phosphoglycerate Mutase 1 Pseudogene 8) is a Pseudogene.
PRSS8	NA	NA	-1.49689		-1.48138	NA	NA	NA	NA		1.22416	NA	NA	NA	NA	NA	NA	NA		Prostasin	This gene encodes a member of the peptidase S1 or chymotrypsin family of serine proteases. The encoded preproprotein is proteolytically processed to generate light and heavy chains that associate via a disulfide bond to form the heterodimeric enzyme. This enzyme is highly expressed in prostate epithelia and is one of several proteolytic enzymes found in seminal fluid. This protease exhibits tryps…		Possesses a trypsin-like cleavage specificity with a preference for poly-basic substrates. Stimulates epithelial sodium channel (ENaC) activity through activating cleavage of the gamma subunits (SCNN1G)	Prognostic summary Prognostic marker in renal cancer (favorable) Cancer specificityi Low cancer specificity Cell line expression clusteri Keratinocytes - Epithelial cell function (mainly) Cell line specificityi Low cancer specificity	Cytogenetic location: 16p11.2 Genomic coordinates (GRCh38): 16:31,131,433-31,135,727
RASD1	NA	NA	-3.23295		-2.80136	NA	NA	NA	NA		NA	NA	NA	NA	NA	NA	NA	NA		Dexamethasone-induced Ras-related protein 1			Small GTPase. Negatively regulates the transcription regulation activity of the APBB1/FE65-APP complex via its interaction with APBB1/FE65	Prognostic summary Gene product is not prognostic Cancer specificityi Low cancer specificity Cell line expression clusteri B-cell cancers - Adaptive immune response (mainly) Cell line specificityi Low cancer specificity	Cytogenetic location: 17p11.2 Genomic coordinates (GRCh38): 17:17,494,437-17,496,395
REEP1	NA	NA	-2.67262		-2.20181	NA	NA	NA	NA		NA	NA	NA	NA	NA	NA	NA	NA			This gene encodes a mitochondrial protein that functions to enhance the cell surface expression of odorant receptors. Mutations in this gene cause spastic paraplegia autosomal dominant type 31, a neurodegenerative disorder. Alternative splicing results in multiple transcript variants. [provided by RefSeq, Sep 2009]		Required for endoplasmic reticulum (ER) network formation, shaping and remodeling; it links ER tubules to the cytoskeleton. May also enhance the cell surface expression of odorant receptors (PubMed:20200447). May play a role in long-term axonal maintenance (PubMed:24478229).	Prognostic summary Gene product is not prognostic Cancer specificityi Cancer enhanced (glioma) Cell line expression clusteri Retina - Visual perception (mainly) Cell line specificityi Low cancer specificity	Cytogenetic location: 2p11.2 Genomic coordinates (GRCh38): 2:86,213,993-86,338,083
RFX5	NA	NA	-1.12631		-1.01064	NA	NA	NA	NA		NA	NA	NA	NA	NA	NA	NA	NA		DNA-binding protein RFX5	A lack of MHC-II expression results in a severe immunodeficiency syndrome called MHC-II deficiency, or the bare lymphocyte syndrome (BLS; MIM 209920). At least 4 complementation groups have been identified in B-cell lines established from patients with BLS. The molecular defects in complementation groups B, C, and D all lead to a deficiency in RFX, a nuclear protein complex that binds to the X bo…		Activates transcription from class II MHC promoters. Recognizes X-boxes. Mediates cooperative binding between RFX and NF-Y. RFX binds the X1 box of MHC-II promoters. ( RFX5_HUMAN,P48382 )	Prognostic summary Gene product is not prognostic Cancer specificityi Low cancer specificity Cell line expression clusteri Non-specific - RNA binding (mainly) Cell line specificityi Low cancer specificity	Cytogenetic location: 1q21.3 Genomic coordinates (GRCh38): 1:151,340,640-151,347,252
RNF224	NA	NA	2.60949		2.17148	NA	NA	NA	NA		NA	NA	NA	NA	NA	NA	NA	NA		RING finger protein 224	Predicted to enable metal ion binding activity. [provided by Alliance of Genome Resources, Apr 2022]			Prognostic summary Gene product is not prognostic Cancer specificityi Low cancer specificity Cell line expression clusteri Non-specific - Cilium assembly (mainly) Cell line specificityi Low cancer specifici
RNVU1-19	NA	NA	1.80158		1.91897	NA	NA	NA	NA		NA	NA	NA	NA	NA	NA	NA	NA			RNVU1-19 (RNA, Variant U1 Small Nuclear 19) is an RNA Gene, and is affiliated with the snRNA class.
RTBDN	NA	NA	-4.11074		-3.82877	NA	NA	NA	NA		NA	NA	NA	NA	NA	NA	NA	NA		Retbindin	This gene was first identified in a study of human eye tissues. The protein encoded by this gene is preferentially expressed in the retina and may play a role in binding retinoids and other carotenoids as it shares homology with riboflavin binding proteins. Alternative splicing results in multiple transcript variants and protein isoforms. [provided by RefSeq, Jul 2012]		Riboflavin-binding protein which might have a role in retinal flavin transport.	Prognostic summary Gene product is not prognostic Cancer specificityi Low cancer specificity Cell line expression clusteri Myeloma - Humoral immune response (mainly) Cell line specificityi Cancer enhanced (Lymphoma)	Cytogenetic location: 19p13.13 Genomic coordinates (GRCh38): 19:12,825,482-12,835,428
SERPINF2	NA	NA	-2.09582		-1.76395	NA	NA	NA	NA		NA	NA	NA	NA	NA	NA	NA	NA		Alpha-2-antiplasmin	This gene encodes a member of the serpin family of serine protease inhibitors. The protein is a major inhibitor of plasmin, which degrades fibrin and various other proteins. Consequently, the proper function of this gene has a major role in regulating the blood clotting pathway. Mutations in this gene result in alpha-2-plasmin inhibitor deficiency, which is characterized by severe hemorrhagic dia…		Serine protease inhibitor. The major targets of this inhibitor are plasmin and trypsin, but it also inactivates matriptase-3/TMPRSS7 and chymotrypsin.	Prognostic summary Prognostic marker in liver cancer (favorable) Cancer specificityi Cancer enriched (liver cancer) Cell line expression clusteri Liver cancer - Metabolism (mainly) Cell line specificityi Group enriched (Gastric cancer, Liver cancer)	Cytogenetic location: 17p13.3 Genomic coordinates (GRCh38): 17:1,742,871-1,755,265
SLPI	NA	NA	-2.54255		-2.51453	NA	NA	NA	NA		NA	NA	NA	NA	NA	NA	NA	NA		Antileukoproteinase	This gene encodes a secreted inhibitor which protects epithelial tissues from serine proteases. It is found in various secretions including seminal plasma, cervical mucus, and bronchial secretions, and has affinity for trypsin, leukocyte elastase, and cathepsin G. Its inhibitory effect contributes to the immune response by protecting epithelial surfaces from attack by endogenous proteolytic enzym…		Acid-stable proteinase inhibitor with strong affinities for trypsin, chymotrypsin, elastase, and cathepsin G (PubMed:3533531, 3462719, 2039600, 2110563, 10702419, 24121345). Modulates the inflammatory and immune responses after bacterial infection, and after infection by the intracellular parasite L.major. Down-regulates responses to bacterial lipopolysaccharide (LPS) (By similarity). Plays a rol…	Prognostic summary Prognostic marker in renal cancer (unfavorable) Cancer specificityi Low cancer specificity Cell line expression clusteri Ovarian & Endometrial cancers - Unknown function (mainly) Cell line specificityi Cancer enhanced (Head and neck cancer, Ovarian cancer)	Cytogenetic location: 20q13.12 Genomic coordinates (GRCh38): 20:45,252,239-45,254,564
SMOC2	NA	NA	-1.49377		-1.24149	NA	NA	NA	NA		1.47828	NA	NA	NA	NA	NA	NA	NA		SPARC-Related Modular Calcium-Binding Protein 2	This gene encodes a member of the SPARC family (secreted protein acidic and rich in cysteine/osteonectin/BM-40), which are highly expressed during embryogenesis and wound healing. The gene product is a matricellular protein which promotes matrix assembly and can stimulate endothelial cell proliferation and migration, as well as angiogenic activity. Associated with pulmonary function, this secreto…		Promotes matrix assembly and cell adhesiveness (By similarity). Can stimulate endothelial cell proliferation, migration, as well as angiogenesis. ( SMOC2_HUMAN,Q9H3U7 )	Prognostic summary Prognostic marker in renal cancer (unfavorable) Cancer specificityi Low cancer specificity Cell line expression clusteri Stomach & Colon cancer - Absorption (mainly) Cell line specificityi Cancer enhanced (Colorectal cancer)	Cytogenetic location: 6q27 Genomic coordinates (GRCh38): 6:168,441,184-168,667,992
SOX2-OT	NA	NA	-2.50646		-2.0645	NA	NA	NA	NA		NA	NA	NA	NA	NA	NA	NA	NA		SOX2 Overlapping Transcript (Non-Protein Coding)	This gene produces alternatively spliced long non-coding RNAs. These RNAs were observed to be upregulated in tumor cells and positively correlated to expression of the SRY-box 2 gene. Overexpression of these transcripts may promote cell proliferation. [provided by RefSeq, Dec 2017]			Prognostic summary Gene product is not prognostic Cancer specificityi Cancer enhanced (glioma) Cell line expression clusteri DU4475 - Unknown function (mainly) Cell line specificityi Low cancer specificity	Cytogenetic location: 3q26.33 Genomic coordinates (GRCh38): 3:181,056,680-181,742,228 Can stimulate endothelial cell proliferation, migration, as well as angiogenesis
STAC	NA	NA	1.26562		1.40163	NA	NA	NA	NA		NA	NA	NA	NA	NA	NA	NA	NA			Predicted to enable transmembrane transporter binding activity. Predicted to be involved in positive regulation of protein localization to plasma membrane; positive regulation of voltage-gated calcium channel activity; and skeletal muscle contraction. Predicted to act upstream of or within cellular response to heat; muscle contraction; and regulation of voltage-gated calcium channel activity. Pre…		Promotes expression of the ion channel CACNA1H at the cell membrane, and thereby contributes to the regulation of channel activity. Plays a minor and redundant role in promoting the expression of calcium channel CACNA1S at the cell membrane, and thereby contributes to increased channel activity. Slows down the inactivation rate of the calcium channel CACNA1C	Prognostic summary Gene product is not prognostic Cancer specificityi Low cancer specificity Cell line expression clusteri Neuroblastoma - Neuronal signaling (mainly) Cell line specificityi Cancer enhanced (Neuroblastoma)	Cytogenetic location: 3p22.3-p22.2 Genomic coordinates (GRCh38): 3:36,380,504-36,548,007 (from NCBI). Сysteine-rich and SH3 domains are frequently found in signal transduction proteins, and suggested that STAC may play a role in the neuron-specific signal transduction pathway
TMEM25	NA	NA	-1.11937		-1.02831	NA	NA	NA	NA		NA	NA	NA	NA	NA	NA	NA	NA		Transmembrane Protein 25	Predicted to be involved in negative regulation of excitatory postsynaptic potential and regulation of protein stability. Predicted to be located in late endosome and lysosome. [provided by Alliance of Genome Resources, Apr 2022]		In neurons, modulates the degradation of NMDA receptor GRIN2B subunit. Plays a role in the regulation of neuronal excitability.	Prognostic summary Prognostic marker in renal cancer (favorable) Cancer specificityi Low cancer specificity Cell line expression clusteri Keratinocytes - Epithelial cell function (mainly) Cell line specificityi Low cancer specificity	Cytogenetic location: 11q23.3 Genomic coordinates (GRCh38): 11:118,531,192-118,547,286 Zhang et al. (2019) found that Tmem25 was involved in Nmdar (138249)-mediated neurotransmission in the mouse hippocampal CA1 region by modulating Nr2b (138252)-mediated currents.
TMEM37	NA	NA	-4.48293		-5.04794	NA	NA	NA	NA		NA	NA	NA	NA	NA	NA	NA	NA		Transmembrane Protein 37	Predicted to enable calcium channel activity and voltage-gated ion channel activity. Predicted to be involved in calcium ion transmembrane transport and regulation of ion transmembrane transport. Predicted to be integral component of membrane. [provided by Alliance of Genome Resources, Apr 2022]		Thought to stabilize the calcium channel in an inactivated (closed) state. Modulates calcium current when coexpressed with CACNA1G (By similarity).	Prognostic summary Gene product is not prognostic Cancer specificityi Cancer enhanced (renal cancer) Cell line expression clusteri Liver cancer - Metabolism (mainly) Cell line specificityi Cancer enhanced (Liver cancer)	Cytogenetic location: 2q14.2 Genomic coordinates (GRCh38): 2:119,429,895-119,438,504. TMEM37 was enriched in beta cells of pancreatic islets and was downregulated in type-2 diabetic islets.
UPK3B	NA	NA	-2.76451		-2.34267	NA	NA	NA	NA		NA	NA	NA	NA	NA	NA	NA	NA		Uroplakin 3B	UPK3B is a minor component of the apical plaques of mammalian urothelium that binds and dimerizes with uroplakin-1b (UPK1B; MIM 602380), one of the major conserved urothelium membrane proteins. The other major conserved integral membrane proteins of urothelial plaques are UPK1A (MIM 611557), UPK2 (MIM 611558), and UPK3A (MIM 611559) (Deng et al., 2002 [PubMed 12446744]).		Uroplakin 3B component of the asymmetric unit membrane (AUM); a highly specialized biomembrane elaborated by terminally differentiated urothelial cells. May play an important role in AUM-cytoskeleton interaction in terminally differentiated urothelial cells. It also contributes to the formation of urothelial glycocalyx which may play an important role in preventing bacterial adherence (By similar…	Prognostic summary Gene product is not prognostic Cancer specificityi Group enriched (ovarian cancer, urothelial cancer) Cell line expression clusteri Ovarian & Endometrial cancers - Unknown function (mainly) Cell line specificityi Cancer enhanced (Ovarian cancer)	Cytogenetic location: 7q11.23 Genomic coordinates (GRCh38): 7:76,510,552-76,516,522 UPK3B is a minor component of the apical plaques of mammalian urothelium that binds and dimerizes with uroplakin-1b (UPK1B; 602380), one of the major conserved urothelium membrane proteins. The other major conserved integral membrane proteins of urothelial plaques are UPK1A (611557), UPK2 (611558), and UPK3A (6115…
VWA8-AS1	NA	NA	-1.78624		-1.59966	NA	NA	NA	NA		NA	NA	NA	NA	NA	NA	NA	NA		VWA8 Antisense RNA 1 (Non-Protein Coding)	VWA8-AS1 (VWA8 Antisense RNA 1 (Head To Head)) is an RNA Gene, and is affiliated with the lncRNA class. Diseases associated with VWA8-AS1 include Testicular Leukemia.
ZNF485	NA	NA	1.21952		1.39208	NA	NA	NA	NA		NA	NA	NA	NA	NA	NA	NA	NA		Zinc Finger Protein 485	Predicted to enable DNA-binding transcription activator activity, RNA polymerase II-specific and RNA polymerase II cis-regulatory region sequence-specific DNA binding activity. Predicted to be involved in regulation of transcription by RNA polymerase II. Predicted to be active in nucleus		May be involved in transcriptional regulation.	Prognostic marker in breast cancer (unfavorable)
